# Supplementary material for: Transcriptome analyses in infertile men reveal germ cell–specific expression and splicing patterns
Source: Life Sci Alliance. 2022 Nov 29;6(2):e202201633. doi: 10.26508/lsa.202201633 (PMC9713473; doi:10.26508/lsa.202201633)
Supplement: Supplementary file 4 [file LSA-2022-01633_TableS4.xlsx]

## Sheet: SPGvsSPC
Table S4: List of DEGs between spermatogonial arrest vs. spermatocyte arrest groups.
ensembl_gene_id	external_gene_name	SPG-1 normalized_counts M1570	SPG-2 normalized_counts M1575	SPG-3 normalized_counts M1072	SPG-4 normalized_counts M2822	SPC-1 normalized_counts M1369	SPC-2 normalized_counts M799	SPC-3 normalized_counts M921	baseMean	log2FoldChange	lfcSE	stat	pvalue	padj
ENSG00000286235	AL035461.3	0	0	0	0	93.4093	46.1371	0	16.1679	7.82677	2.51194	-3.11582	0.00183431	0.0127419
ENSG00000278289	CT45A6	0	0	0	0	17.4359	78.8012	7.41762	21.0799	7.39651	1.34521	-5.49839	3.8328e-08	2.61607e-06
ENSG00000188985	DHFRP1	0	0	0	0	42.3766	21.8084	22.0977	21.8618	7.13294	1.56553	-4.55625	5.20744e-06	0.000139624
ENSG00000285982	AC012213.5	0	0	0	0	45.5863	26.4504	7.99231	10.3659	7.0231	1.98266	-3.54226	0.000396715	0.00410215
ENSG00000180613	GSX2	0	0	0	0	26.5716	43.6969	3.1533	5.63817	6.89718	2.22577	-3.09879	0.00194311	0.0133107
ENSG00000124208	PEDS1-UBE2V1	0	0	0	0	32.1632	0	40.0397	30.5722	6.87775	2.20268	-3.12245	0.00179352	0.0125343
ENSG00000285446	Z84488.1	0	0	0	0	17.3134	36.2859	0	9.3196	6.44583	2.2893	-2.81563	0.00486818	0.026272
ENSG00000217414	DDX18P3	0	0	0	0	29.6384	13.8495	8.121	5.55756	6.38634	1.37498	-4.64469	3.40595e-06	9.93598e-05
ENSG00000285565	AL671762.1	0	0	0	0	0	47.3617	0	5.48458	6.2687	2.47243	-2.53544	0.0112306	0.0482484
ENSG00000265179	AP000894.2	0	0	2.00833	3.05311	132.905	123.226	29.0684	29.286	6.13274	0.990277	-6.19295	5.90472e-10	8.02283e-08
ENSG00000257046	SLCO1B3-SLCO1B7	0	0	0	0	13.666	29.2337	0	4.44654	6.12067	1.96292	-3.11815	0.00181988	0.0126797
ENSG00000276687	AL356130.1	0	0	0	0	14.9646	25.1783	2.53054	17.9772	6.11343	1.87665	-3.25763	0.00112348	0.00888499
ENSG00000147160	AWAT2	0	0	1.19165	0	39.5274	31.5685	22.4044	9.62619	6.09254	1.1147	-5.46562	4.6128e-08	2.9958e-06
ENSG00000170423	KRT78	0	0	1.04511	0	37.7519	26.9613	22.705	10.2303	6.08498	1.11287	-5.46784	4.55563e-08	2.96466e-06
ENSG00000286955	AC100858.3	0	0	0.966462	0	2.47581	52.1665	12.3893	121.944	6.07027	1.21741	-4.98621	6.15737e-07	2.46817e-05
ENSG00000251151	HOXC-AS3	0.890671	0	4.77874	0.761166	191.992	81.1311	60.7736	42.3307	6.00266	0.783455	-7.66179	1.83361e-14	1.30993e-11
ENSG00000243048	FTHL18	0	0	1.15407	0	9.91868	43.5308	10.6106	7.16773	5.94502	1.23547	-4.81196	1.49459e-06	5.12238e-05
ENSG00000244065	MARK2P17	0	0	5.5987	0	92.7124	102.06	60.7411	85.6236	5.91485	0.708895	-8.34375	7.1971e-17	1.10177e-13
ENSG00000218976	IMPDH1P9	0	0	0	1.03018	28.6492	13.9244	11.2771	7.83204	5.73312	1.15964	-4.94389	7.65784e-07	2.95895e-05
ENSG00000231808	LINC01388	0	0	0	0	21.4054	8.63376	1.88286	25.1949	5.70104	1.2047	-4.73232	2.21963e-06	7.07201e-05
ENSG00000227128	LBX1-AS1	0	0	0.472129	0	18.0022	7.44649	17.7974	42.6282	5.67399	1.13117	-5.01604	5.27462e-07	2.19081e-05
ENSG00000270754	NEK4P3	0	0	0	0	10.4336	12.1345	7.54584	4.58076	5.61573	1.24251	-4.51969	6.19315e-06	0.000162
ENSG00000136352	NKX2-1	0	0	0	0	6.58505	12.232	9.97588	3.80662	5.54705	1.41581	-3.91793	8.93144e-05	0.0013361
ENSG00000061492	WNT8A	0	0	0	1.31736	11.3367	29.3117	9.91784	17.68	5.52832	1.14387	-4.83299	1.34497e-06	4.71003e-05
ENSG00000204437	CTSLP6	0	0	0	0	10.5095	17.5309	0	7.75677	5.50614	1.41938	-3.87925	0.000104779	0.00150509
ENSG00000235699	CXorf51B	0	0	0	0	12.6585	8.91709	4.78477	32.8764	5.42539	1.30327	-4.1629	3.14234e-05	0.000596339
ENSG00000240661	AC063952.1	0	0	1.97807	0.659855	15.4939	10.7885	72.852	20.3163	5.41638	1.1535	-4.69562	2.65803e-06	8.17706e-05
ENSG00000268595	AC063977.3	0	0	0	0	3.50144	21.6819	0.948832	8.41977	5.40842	1.43559	-3.76739	0.000164963	0.00211875
ENSG00000204363	SPANXN5	0	0	0	0	1.01017	24.6964	0	16.5955	5.38772	1.73843	-3.09919	0.00194053	0.0132958
ENSG00000279708	AC133637.1	0	0	0	0	7.51025	11.4469	6.62683	3.71198	5.37773	1.21021	-4.44364	8.84504e-06	0.000217893
ENSG00000236521	NPAP1P4	1.21221	0	1.08505	0	18.5945	41.5409	10.1905	8.25216	5.36597	1.16597	-4.60216	4.18138e-06	0.000116788
ENSG00000204614	TRIM40	1.99055	0	0	0	30.6681	2.76172	12.3863	14.3265	5.32915	1.36396	-3.90711	9.34071e-05	0.00138317
ENSG00000171540	OTP	0	0	1.67575	0	27.1336	22.2119	10.9921	8.83697	5.29094	1.22337	-4.3249	1.52601e-05	0.000339035
ENSG00000269445	AC067969.2	0	0	2.35251	0	31.6821	23.853	11.6324	11.9398	5.2896	1.14704	-4.61154	3.99701e-06	0.000112815
ENSG00000204710	SPDYC	0	0	1.10213	1.01766	29.31	24.7837	11.1624	6.85511	5.27862	1.18941	-4.43804	9.07833e-06	0.000222957
ENSG00000256025	CACNA1C-AS4	0	0	0	0	4.89784	11.7123	7.09509	7.9363	5.25512	1.19161	-4.41011	1.03317e-05	0.000246579
ENSG00000158055	GRHL3	0	0.871272	0.749888	2.07429	33.919	57.7432	15.5499	30.6386	5.24794	0.836531	-6.27345	3.53125e-10	5.25568e-08
ENSG00000239649	MYADML	0	0	3.9393	0	36.2731	80.4346	2.5242	100.226	5.23165	1.10367	-4.74022	2.13485e-06	6.89068e-05
ENSG00000225057	AC012485.1	0	0	0	0	1.51572	17.508	4.0806	28.4356	5.2234	1.30462	-4.00377	6.23423e-05	0.00100966
ENSG00000174521	TTC9B	0.863734	0	0.755372	0	13.7239	16.1135	21.5334	4.90293	5.18953	1.25476	-4.13587	3.5361e-05	0.000652201
ENSG00000176635	HORMAD2	0	0	24.7264	0	195.945	342.94	153.874	226.649	5.1752	1.16419	-4.44532	8.77593e-06	0.000216356
ENSG00000125571	IL37	0	0	0	0	7.01075	13.5022	1.80271	4.68261	5.16341	1.30227	-3.96494	7.34138e-05	0.0011468
ENSG00000102055	PPP1R2C	1.2373	0	11.0545	1.02644	152.937	136.834	73.7105	78.4252	5.16279	0.748531	-6.89722	5.303e-12	1.39738e-09
ENSG00000279231	AL356585.3	1.15079	0	0	0	13.6425	14.2722	8.20113	3.9918	5.16035	1.46948	-3.51169	0.000445268	0.00447887
ENSG00000232494	AL161912.1	1.14812	0	1.06494	0	7.63045	41.709	10.0901	55.5065	5.14895	1.14759	-4.48676	7.23147e-06	0.000184799
ENSG00000124237	C20orf85	0	0	2.21887	0	11.7649	33.2684	14.9624	93.1712	5.14397	1.1156	-4.61093	4.00865e-06	0.000112846
ENSG00000267228	AC012254.2	0	0	3.68133	0	46.7448	32.2744	15.2561	7.64815	5.12628	1.73915	-2.94757	0.0032028	0.0193069
ENSG00000244402	RN7SL314P	0	0	1.1865	0	5.71063	23.8713	6.52083	16.9987	5.10319	1.15414	-4.42163	9.7958e-06	0.000236423
ENSG00000282419	TEX13D	0.744049	0	35.0297	6.83099	442.804	381.391	270.566	110.634	5.08951	0.81093	-6.27613	3.47098e-10	5.19e-08
ENSG00000132446	FTHL17	0	2.57478	9.91365	2.01188	133.274	146.859	92.5198	32.2443	5.08306	0.592115	-8.58457	9.11761e-18	2.094e-14
ENSG00000241353	PPP1R2P4	0	0	0	0	0	15.7971	4.71895	6.60524	5.06171	1.45563	-3.47733	0.000506441	0.00492385
ENSG00000286352	AC104451.2	0	0	0	0	6.28831	10.4444	3.71133	10.0677	5.05361	1.1763	-4.29619	1.73758e-05	0.000377942
ENSG00000257756	LINC02386	0	0	0	0	2.96265	15.5667	1.78006	6.79542	5.03268	1.34442	-3.74339	0.000181555	0.00226929
ENSG00000268629	TEX13A	0	1.29748	4.38149	1.03648	83.5137	38.1481	43.4868	29.914	5.01262	0.707608	-7.0839	1.40158e-12	4.84495e-10
ENSG00000224124	POM121L10P	1.23711	0	1.10616	0	7.09696	43.8796	4.6753	198.591	5.01118	1.18995	-4.21126	2.53954e-05	0.000507718
ENSG00000216990	HSPD1P10	0	1.16481	0	0	10.3628	19.4801	2.64853	8.69208	5.00554	1.36048	-3.67925	0.000233924	0.00273959
ENSG00000260422	Z97205.2	0	0	2.12933	0	11.038	32.5722	10.1613	19.0539	5.00376	1.26563	-3.95358	7.69905e-05	0.0011892
ENSG00000163499	CRYBA2	0	0	0	0	2.66698	11.2837	5.7418	6.60147	4.97824	1.23906	-4.01774	5.87599e-05	0.000966247
ENSG00000250133	HOXC-AS2	1.05323	0	8.57593	0	99.8539	44.7438	47.8517	24.9704	4.97272	0.964977	-5.1532	2.56077e-07	1.21781e-05
ENSG00000280412	AC004790.2	0	0	1.18967	0	7.95211	16.0372	8.8522	30.5535	4.97012	1.09077	-4.55651	5.20102e-06	0.000139568
ENSG00000233913	RPL10P9	0	0	0	0	7.36178	7.10111	4.62952	7.03801	4.95727	1.6346	-3.03272	0.00242362	0.0157626
ENSG00000233887	AL354685.1	0	0	10.9082	0	106.523	92.8689	57.5063	19.8309	4.95665	1.05287	-4.70773	2.50488e-06	7.81815e-05
ENSG00000254497	AC103681.1	0	0	0	0	3.92634	10.9544	3.95837	11.32	4.94659	1.25833	-3.93108	8.45647e-05	0.00128114
ENSG00000243918	EIF4BP8	1.21326	0	0	1.0265	19.2734	24.2581	8.46494	16.898	4.94546	1.13237	-4.36734	1.25771e-05	0.000290258
ENSG00000233217	MROH3P	1.20523	0	10.6878	2.06852	121.707	130.523	80.561	48.016	4.94253	0.605421	-8.16379	3.24665e-16	4.01436e-13
ENSG00000239552	HOXB-AS2	0	0	1.09873	0	13.3375	8.70135	9.38515	5.22164	4.94088	1.17159	-4.21725	2.47303e-05	0.000497828
ENSG00000277535	AL772284.1	0	0	21.7616	1.06091	224.023	157.093	144.104	52.9427	4.93678	0.898768	-5.49283	3.95549e-08	2.68272e-06
ENSG00000202444	RNU5E-6P	2.26075	2.8333	10.3835	6.05925	74.7435	410.367	10.8824	46.8056	4.92871	0.898925	-5.48289	4.18434e-08	2.7793e-06
ENSG00000237862	Z94160.1	0	0	7.57442	0	24.508	135.866	15.4799	218.999	4.9279	1.12587	-4.37696	1.20348e-05	0.000279145
ENSG00000184478	OR56A3	0	3.91471	0.51789	0	14.2033	34.0734	4.47165	15.0579	4.91852	1.30542	-3.76778	0.000164707	0.00211631
ENSG00000253798	AC008694.1	0	2.45843	1.0834	0	26.5593	42.8474	5.39763	106.009	4.88019	0.965115	-5.05659	4.26816e-07	1.84576e-05
ENSG00000229621	LINC01822	0.950787	0	0	0	8.57986	12.4689	7.03515	4.05671	4.86386	1.22654	-3.96552	7.32348e-05	0.00114511
ENSG00000230711	CTAGE13P	0	0	0	0	5.5555	9.78685	2.67863	19.217	4.86232	1.35188	-3.59671	0.000322263	0.00350798
ENSG00000268080	AC016885.3	0	0	0	0	6.088	10.5507	0.958106	4.36086	4.84791	1.33862	-3.62157	0.000292822	0.00326523
ENSG00000267952	AC008878.1	1.27711	0	0	0	19.4358	4.65082	5.80945	4.35699	4.84748	1.36544	-3.55013	0.000385037	0.00401444
ENSG00000259169	GNRHR2P1	0	0	0	0	1.828	15.7182	0	5.07656	4.82995	1.66329	-2.90384	0.00368613	0.0213864
ENSG00000268447	SSX2B	14.7642	11.1776	5.69381	4.68615	436.056	335.914	3.1645	80.4201	4.8243	1.66106	-2.90434	0.00368024	0.0213599
ENSG00000232030	MAGEB6B	0	0	4.35853	4.07981	80.8619	63.081	39.9063	13.7508	4.80883	0.857021	-5.6111	2.0104e-08	1.52791e-06
ENSG00000278464	AC068506.1	0	0	0.638586	0	1.47847	18.0185	3.69802	16.4394	4.76636	1.2782	-3.72896	0.000192271	0.00236462
ENSG00000230031	POTEB2	0	0	0	0	11.2186	5.52733	0	17.4581	4.75947	1.81132	-2.62763	0.00859815	0.0397808
ENSG00000187833	C2orf78	1.16568	1.2262	26.2924	0	228.473	223.074	134.478	142.049	4.75142	0.821344	-5.78493	7.25421e-09	6.47801e-07
ENSG00000260021	AC098934.2	0	0	0	0	5.69158	5.018	5.63892	7.10399	4.73478	1.23826	-3.82375	0.000131439	0.00178744
ENSG00000232197	AL596442.1	0	0	0	0	5.76635	8.08839	2.30976	6.59019	4.72676	1.64245	-2.87788	0.00400363	0.0227971
ENSG00000230835	AP001187.1	0	1.26903	1.08006	1.02379	27.0055	25.9735	13.9937	9.50355	4.72072	0.958199	-4.92666	8.3647e-07	3.17636e-05
ENSG00000162039	MEIOB	5.96909	2.58643	97.2775	4.95458	778.918	1014.15	413.309	352.643	4.71387	1.01016	-4.66644	3.06458e-06	9.13069e-05
ENSG00000182459	TEX19	3.58624	0	73.3619	0	630.105	590.642	281.012	219.757	4.69966	1.43285	-3.27993	0.00103832	0.00841655
ENSG00000105467	SYNGR4	0	1.14116	11.8205	0.917877	85.0506	152.208	38.4549	116.024	4.68765	0.725459	-6.46163	1.03584e-10	1.80978e-08
ENSG00000272694	Z94160.2	0	0	0	0	5.21349	9.49725	0.96731	37.2461	4.67823	1.12588	-4.15519	3.25019e-05	0.000611036
ENSG00000227616	AC063976.3	0	0	0	1.05123	11.0344	10.1906	4.84916	3.74547	4.67795	1.26488	-3.69833	0.000217024	0.00258883
ENSG00000236417	CTSLP1	0	0	0	0	2.8755	9.3204	3.69529	8.92367	4.67791	1.20372	-3.88622	0.000101818	0.0014751
ENSG00000124334	IL9R	0.387033	0.401035	1.40318	0	16.1344	7.00369	25.5781	7.90839	4.66784	1.12269	-4.15775	3.21404e-05	0.000606012
ENSG00000215277	RNF212B	0	0	7.37507	2.15716	57.779	110.992	39.8238	41.2829	4.66629	0.702637	-6.64112	3.11314e-11	6.29441e-09
ENSG00000185594	SPATA8	1.49103	3.62743	31.3826	5.08751	144.504	515.935	157.081	712.858	4.66014	0.710165	-6.56206	5.30712e-11	1.01556e-08
ENSG00000285711	LINC02835	1.17922	0	2.13605	1.01129	22.6717	41.0975	20.0654	18.446	4.64588	0.818181	-5.6783	1.36041e-08	1.10162e-06
ENSG00000276460	AC073869.2	0	0	1.07658	1.01413	17.6505	12.3526	10.9933	5.93825	4.6172	1.14093	-4.04687	5.19078e-05	0.000875516
ENSG00000146722	AC211486.1	0	1.0122	3.50494	0.811546	17.5603	75.1839	11.837	127.793	4.61344	0.823805	-5.60016	2.14155e-08	1.61233e-06
ENSG00000255714	LINC02460	0	0	0	0	7.09848	5.1398	2.76128	4.75111	4.60166	1.25163	-3.67654	0.000236423	0.00276182
ENSG00000124143	ARHGAP40	0	0	0	0	6.36466	7.83389	0.915665	14.6586	4.58792	1.29675	-3.53802	0.000403138	0.0041592
ENSG00000278803	AC236972.4	1.25287	0	6.5849	0	5.34854	93.8188	43.5543	16.1291	4.58625	1.07076	-4.28317	1.84252e-05	0.000393576
ENSG00000181408	UTS2R	1.24307	0	7.69529	0	87.0624	46.7989	28.936	30.2249	4.58586	0.845916	-5.42118	5.92057e-08	3.69582e-06
ENSG00000183305	MAGEA2B	6.3295	0	1.85032	1.68606	75.3843	56.9093	73.2942	26.8072	4.58067	0.836279	-5.47744	4.31512e-08	2.84268e-06
ENSG00000286028	AP002008.4	0	0	2.01137	0	9.92672	24.1841	5.42903	18.8682	4.56663	1.13613	-4.01945	5.8334e-05	0.000961704
ENSG00000165828	PRAP1	1.29525	1.33291	2.27271	6.09384	86.2726	70.6577	47.6445	30.1303	4.54869	0.551522	-8.24752	1.61715e-16	2.07953e-13
ENSG00000287442	AC079460.2	1.09432	0	0	0.998814	5.86823	21.0767	10.7945	3.87478	4.53188	1.24668	-3.63517	0.000277797	0.00313625
ENSG00000232715	LINC01022	0	0	0	0	6.933	5.23989	1.8935	10.7627	4.52677	1.23712	-3.65912	0.000253086	0.0029162
ENSG00000130957	FBP2	0	0	2.18993	1.02886	19.0058	30.5308	8.40504	8.90634	4.51985	0.985231	-4.58761	4.48353e-06	0.000122879
ENSG00000261241	LINC02128	0	0	0	0	4.99422	6.22527	2.87378	4.19232	4.51627	1.23182	-3.66634	0.000246044	0.00285326
ENSG00000237452	BHMG1	3.76816	0	62.0829	9.30745	546.677	426.971	320.372	149.505	4.5148	0.840392	-5.37226	7.77576e-08	4.62061e-06
ENSG00000021852	C8B	0	0	0	0	2.11422	11.8034	1.69738	5.26776	4.51291	1.61582	-2.79295	0.00522293	0.0277669
ENSG00000183150	GPR19	1.14925	0	2.59173	0.503346	22.3778	34.035	26.6008	17.6388	4.50822	0.627945	-7.17931	7.00621e-13	2.64983e-10
ENSG00000234141	AC006042.3	0	0	2.88597	0	7.8409	35.2214	11.5929	41.7953	4.50642	1.01152	-4.45512	8.38476e-06	0.000207989
ENSG00000212297	RNU6-821P	0	0	0	0	5.51147	7.81344	0.867462	4.18434	4.50374	1.38519	-3.25134	0.00114862	0.00902612
ENSG00000261949	GFY	0	0	2.28299	0	7.02644	18.3354	13.546	6.05326	4.50364	1.18147	-3.8119	0.000137901	0.0018527
ENSG00000125798	FOXA2	0	0	2.22304	0	10.6667	23.0924	4.75101	5.03616	4.50215	1.29779	-3.46908	0.000522237	0.00503414
ENSG00000244234	GMCL2	1.02473	0	3.70162	0	10.0591	66.2348	10.3586	186.195	4.49808	0.891887	-5.04333	4.575e-07	1.95842e-05
ENSG00000259282	SPATA8-AS1	0	0	3.37651	0	9.44325	39.0249	9.09205	46.3816	4.49797	1.02592	-4.38433	1.16345e-05	0.000270734
ENSG00000261239	ANKRD26P1	2.17607	1.30528	49.6863	23.7937	280.166	825.173	195.294	781.435	4.49264	0.957309	-4.69299	2.6924e-06	8.25909e-05
ENSG00000170777	TPD52L3	0	0	13.6497	1.27767	57.4899	180.417	30.0202	494.239	4.47715	1.06528	-4.2028	2.63637e-05	0.000523173
ENSG00000231128	AL137856.1	0.738951	0	5.7961	0.714154	48.3687	43.998	32.9083	58.8334	4.47418	0.697857	-6.41132	1.44265e-10	2.44097e-08
ENSG00000204919	PRR20A	0	0	2.18019	0	8.48048	16.3281	12.2722	5.16485	4.45683	1.18459	-3.76233	0.000168339	0.00215093
ENSG00000259116	AL049869.2	0	1.06683	1.78306	0	16.5097	24.3097	8.05263	28.8559	4.45282	0.94466	-4.71368	2.43288e-06	7.66035e-05
ENSG00000230523	LINC01756	0	0	1.07184	0	9.32161	8.38865	4.58435	4.73673	4.44814	1.18466	-3.75478	0.000173491	0.00219668
ENSG00000204091	TDRG1	3.69344	0	116.788	6.19693	582.503	1049.63	442.705	435.379	4.44717	1.33469	-3.33198	0.000862308	0.00732791
ENSG00000226488	LINC01824	0	0	0	0	1.21972	8.88697	4.0261	7.93096	4.44286	1.2645	-3.51354	0.000442171	0.00445888
ENSG00000226059	HMGB3P20	0	0	2.18887	1.03801	21.3662	21.9464	11.4004	10.0455	4.43836	1.00045	-4.43636	9.14932e-06	0.00022449
ENSG00000236446	CT47B1	0	5.26116	17.2869	18.1238	291.108	179.817	198.9	61.5696	4.43765	0.531759	-8.34523	7.10776e-17	1.10177e-13
ENSG00000277837	AC090340.1	0	2.44946	24.448	6.32404	111.762	337.749	97.4912	96.9309	4.43618	0.702629	-6.31369	2.72463e-10	4.21112e-08
ENSG00000287635	AL139381.1	0	1.19288	0	0	7.11601	10.3474	4.49718	3.82905	4.434	1.23879	-3.57929	0.000344529	0.00369937
ENSG00000285528	AC097104.1	0	0	0	0	7.07174	4.3688	1.82095	4.96429	4.42819	1.71811	-2.57737	0.0099555	0.0442546
ENSG00000197616	MYH6	0	0	4.16023	0	22.8764	5.36954	2.89624	4.02039	4.42767	1.38977	-3.18591	0.00144301	0.0107022
ENSG00000182931	WFDC10B	0	0	1.27647	0	4.63448	15.3559	2.16978	9.96078	4.41333	1.31888	-3.34626	0.000819102	0.00706154
ENSG00000154764	WNT7A	0	0	1.3636	0	18.5189	2.70376	11.7391	17.2262	4.41238	1.31644	-3.35175	0.000803018	0.00695459
ENSG00000223889	AC073188.1	1.2698	0	0	0	6.12175	12.1638	3.72238	9.28776	4.40961	1.15253	-3.82601	0.000130235	0.00177385
ENSG00000163424	TEX55	0	1.30288	0.870822	0	16.1632	8.75554	9.06502	266.491	4.40848	1.2781	-3.44924	0.000562166	0.00530608
ENSG00000178928	TPRX1	0	0	2.26144	2.10126	21.1554	28.0096	22.3991	10.7646	4.39512	0.882214	-4.98192	6.29562e-07	2.51106e-05
ENSG00000213304	AC008481.2	0	0	0	0	2.65989	6.43301	3.8238	4.02067	4.39251	1.30063	-3.37721	0.000732241	0.00649203
ENSG00000213296	AC005521.1	0	0	1.11724	1.03575	7.08859	24.4318	3.75775	5.91207	4.37575	1.28134	-3.41499	0.000637841	0.00584197
ENSG00000269096	CT45A3	6.88316	0	10.4432	23.365	154.886	393.837	91.5848	88.8882	4.37309	0.732175	-5.97274	2.33302e-09	2.40391e-07
ENSG00000243636	AL445493.2	0	0	0	0	4.47146	6.73622	1.81462	10.0062	4.37152	1.20013	-3.64254	0.000269963	0.00307169
ENSG00000199347	RNU5E-1	50.855	46.5233	73.0843	103.896	577.704	3301.63	375.675	472.039	4.36767	0.632266	-6.90797	4.91634e-12	1.33941e-09
ENSG00000236957	AL139010.1	0	0	1.14296	0	8.58809	10.1217	2.59388	3.58244	4.35609	1.38843	-3.13742	0.00170439	0.0120932
ENSG00000167459	LINC00905	1.49897	2.20679	49.6563	0	300.434	328.392	205.832	384.687	4.34383	1.12851	-3.84918	0.000118513	0.00165147
ENSG00000182583	VCX	3.25905	10.1753	55.2871	75.6951	1388.29	583.973	248.302	209.378	4.34226	0.778513	-5.57764	2.43805e-08	1.81012e-06
ENSG00000229183	PGA4	0	0.687182	0	0	6.77244	7.60415	3.46718	4.23451	4.33403	1.67398	-2.58905	0.00962405	0.0431452
ENSG00000148702	HABP2	0	1.03471	0.892191	0.847315	5.65087	28.8833	7.47822	7.80352	4.32496	1.11793	-3.86871	0.000109412	0.00155361
ENSG00000224462	C4BPAP1	1.14104	0	2.06669	0	14.4024	21.6953	12.8098	11.5682	4.30365	0.980176	-4.39069	1.1299e-05	0.00026456
ENSG00000070748	CHAT	1.22715	0	1.6421	2.01472	18.5628	39.5865	14.9242	11.1156	4.30263	0.964647	-4.46031	8.18394e-06	0.00020411
ENSG00000227660	UST-AS1	0	0	0	1.0036	5.28414	13.8459	0.91513	7.20667	4.29803	1.321	-3.25362	0.00113945	0.00897087
ENSG00000284516	VAMP9P	0	0	0	0	3.55065	4.73984	3.7554	3.64332	4.29004	1.27982	-3.35207	0.000802087	0.00694839
ENSG00000228799	LINC01939	0	0	0	0	0	7.63266	4.09336	16.5495	4.28978	1.36704	-3.138	0.00170104	0.0120744
ENSG00000215771	LRRC37A14P	0	0	2.20729	0	11.6328	14.8979	6.50011	13.4252	4.28261	1.09979	-3.89404	9.85891e-05	0.00144197
ENSG00000261491	DNM1P31	0	0	0	2.04571	16.428	8.82616	6.64811	8.10051	4.27124	1.12844	-3.7851	0.000153649	0.00201042
ENSG00000229894	GK3P	0	0	0	0	4.47641	5.75379	1.80872	46.6704	4.26816	1.31493	-3.24593	0.00117068	0.00915472
ENSG00000176774	MAGEB18	0	0	15.4239	4.04189	75.2726	153.414	58.2963	24.1602	4.26611	0.908757	-4.69445	2.67328e-06	8.21613e-05
ENSG00000264421	AC007448.3	0	0	0	0	2.03664	6.83393	2.8383	6.19818	4.25421	1.35955	-3.12912	0.00175329	0.0123336
ENSG00000267978	MAGEA9B	4.9718	4.51375	32.311	38.396	573.963	501.75	88.4514	108.744	4.24831	0.875724	-4.8512	1.2272e-06	4.35451e-05
ENSG00000269954	AC022239.1	0	0	0.707592	0.669078	13.2158	6.04238	6.1173	3.79685	4.24461	1.26097	-3.36615	0.00076226	0.00668991
ENSG00000228630	HOTAIR	1.32711	2.10209	18.5938	1.15269	116.93	127.132	60.0247	55.5674	4.24343	0.772441	-5.49353	3.93987e-08	2.67802e-06
ENSG00000264859	DSG2-AS1	0	0	0	0	0	8.60188	3.07395	12.2108	4.23743	1.43098	-2.96121	0.0030643	0.018707
ENSG00000266050	AC233702.6	0	0	7.66149	4.16402	33.7381	99.7244	32.718	26.9332	4.23521	0.895859	-4.72754	2.27254e-06	7.19072e-05
ENSG00000285532	LINC02788	0	0	1.21103	0	6.302	3.70453	9.88756	4.18515	4.234	1.32293	-3.20047	0.00137202	0.0103297
ENSG00000105251	SHD	0	0	0.734927	0	1.43637	15.7619	3.35627	3.90757	4.23357	1.5127	-2.79868	0.00513112	0.0274012
ENSG00000260450	LINC02134	0	0	0	0	2.79979	6.79022	1.61743	4.05479	4.22926	1.46114	-2.8945	0.00379765	0.0218771
ENSG00000243995	AL035660.2	0	0	2.01048	0.917544	20.9705	17.3458	5.88673	12.8151	4.22375	1.02029	-4.13977	3.47651e-05	0.000643795
ENSG00000229292	RFPL4AL1	0	4.98477	2.12121	0	27.5615	36.0956	32.207	10.8706	4.2219	0.901805	-4.68161	2.84637e-06	8.6163e-05
ENSG00000131126	TEX101	8.43498	3.59828	300.983	31.0331	1728.1	1987.84	1085.08	700.591	4.21817	1.17602	-3.58681	0.000334744	0.00361521
ENSG00000215131	C16orf90	0	0	3.32423	0	14.3759	21.4957	11.153	69.1221	4.21774	0.976557	-4.31899	1.56748e-05	0.000347011
ENSG00000214915	BX546450.1	0	0	8.14317	0	20.1713	57.8732	34.496	9.50241	4.2163	1.01372	-4.15922	3.1934e-05	0.000603395
ENSG00000154227	CERS3	2.93316	16.5752	21.7008	3.02594	135.054	411.358	68.6781	222.025	4.20836	0.841432	-5.00143	5.69064e-07	2.31573e-05
ENSG00000275852	LINC01742	0	0	0	0	7.34482	3.0336	0.935577	5.27276	4.20801	1.36206	-3.08944	0.00200536	0.0136325
ENSG00000256704	ENTR1P1	0	0	0	0	4.49944	5.85768	0.94094	7.75097	4.19888	1.34022	-3.13298	0.00173042	0.0122209
ENSG00000226348	VN2R10P	0	1.23098	0	0	3.94375	12.0838	2.71493	4.15135	4.19332	1.38748	-3.02225	0.00250906	0.0161438
ENSG00000229937	PRPS1L1	1.17139	0	8.44183	0	25.4329	89.9398	20.1759	96.9613	4.19192	0.777168	-5.39384	6.89662e-08	4.1991e-06
ENSG00000234578	AL355483.3	0	0	0.974405	0	5.52108	10.1414	2.71017	3.52365	4.17868	1.30412	-3.20422	0.00135428	0.0102296
ENSG00000283247	CCDC201	0	1.21058	0	0	9.41635	4.38138	4.51835	5.07442	4.17608	1.20744	-3.45862	0.000542954	0.00518003
ENSG00000214842	RAD51AP2	0.967922	0	102.76	11.316	572.809	663.212	320.498	263.206	4.16845	1.27472	-3.27009	0.00107511	0.00859236
ENSG00000244086	AC110749.1	0	0	0	0	4.12139	5.16026	1.84509	3.93764	4.16781	1.30613	-3.19097	0.00141794	0.0105837
ENSG00000215785	CFL1P6	0	0	0	2.09113	6.24318	17.1497	6.75434	8.56544	4.16694	1.12573	-3.70156	0.000214277	0.00256771
ENSG00000182798	MAGEB17	2.36919	2.63747	12.5154	1.99896	121.682	92.0471	49.3788	27.6435	4.16517	0.592327	-7.03188	2.03762e-12	6.55055e-10
ENSG00000232416	BPESC1	0	0	5.18713	2.01885	30.0612	50.2247	22.8127	16.5356	4.16276	0.686073	-6.06752	1.299e-09	1.49678e-07
ENSG00000236052	LINC01643	0	0	0	0	5.27905	3.87257	1.49778	16.358	4.16187	1.30284	-3.19445	0.00140097	0.0104984
ENSG00000237250	AL359924.1	0	0	1.05604	0	7.96605	7.52583	2.7688	3.64886	4.16102	1.28054	-3.24943	0.00115638	0.00907349
ENSG00000143452	HORMAD1	27.0407	8.8143	159.563	25.5687	946.282	1440.03	586.656	755.98	4.15737	0.861837	-4.82385	1.40813e-06	4.88333e-05
ENSG00000177143	CETN1	0	0	21.6188	0	72.3787	188.567	31.1187	418.887	4.15656	1.32312	-3.14149	0.00168093	0.0119685
ENSG00000260478	AC007333.1	0	0	0	0	5.43599	3.59707	1.48727	5.47535	4.14656	1.24375	-3.33391	0.000856349	0.00728497
ENSG00000128564	VGF	2.62151	2.49275	22.3863	3.22685	211.727	49.1655	150.807	35.5542	4.14513	0.811147	-5.1102	3.21811e-07	1.45918e-05
ENSG00000237286	CARD11-AS1	0	0	0	1.00085	3.9881	13.1486	0.909785	8.77137	4.1367	1.29904	-3.18444	0.00145036	0.0107459
ENSG00000259609	AC027807.1	0	0	1.03722	0	2.25475	10.0369	5.48839	4.45279	4.13613	1.26154	-3.27864	0.00104309	0.00842986
ENSG00000224887	NFYCP2	0	0	0	0	3.79099	6.13982	0.934352	4.05626	4.13531	1.415	-2.92248	0.00347251	0.0204833
ENSG00000169551	CT55	2.27598	0	19.1404	6.03972	121.735	139.803	109.823	42.2936	4.13395	0.618232	-6.68672	2.2823e-11	4.89143e-09
ENSG00000214045	IMPDH1P2	0	0	0	2.07632	13.4991	11.0667	4.67064	3.76542	4.13311	1.21621	-3.39836	0.000677918	0.00611325
ENSG00000163114	PDHA2	0	0	8.44188	1.0168	40.4463	65.1059	24.073	211.976	4.12534	0.654799	-6.30016	2.97343e-10	4.5519e-08
ENSG00000247131	AC025263.1	0	0	0	1.41072	3.36072	7.18464	8.73058	15.3982	4.12263	1.21325	-3.398	0.000678813	0.00611959
ENSG00000234442	BX276092.5	1.44367	0.499171	5.64461	26.4937	127.902	162.954	75.0056	36.2422	4.1195	1.02086	-4.03531	5.45311e-05	0.000910683
ENSG00000274183	H2AB1	1.34472	0	9.36313	0	73.0564	35.1591	31.0029	12.8629	4.11677	1.62394	-2.53505	0.0112432	0.048296
ENSG00000251503	CENPS-CORT	0	8.47664	2.26881	1.71763	45.1586	68.3081	14.9942	51.0145	4.11499	0.704145	-5.84396	5.09741e-09	4.80562e-07
ENSG00000185313	SCN10A	0	0	1.10662	0	6.09729	8.89462	2.89632	8.11886	4.11306	1.30163	-3.15993	0.00157809	0.0114469
ENSG00000267389	AC006504.4	0	0	4.42815	4.16815	42.5525	52.5582	20.8355	14.7365	4.11176	0.707898	-5.80841	6.3069e-09	5.75e-07
ENSG00000251155	SEPTIN14P4	0	1.33469	0	0.99606	12.7949	9.44333	7.06669	4.66768	4.11079	1.29312	-3.17898	0.00147795	0.0108995
ENSG00000272259	LINC01749	0	0.91338	1.57754	1.47552	28.7328	19.0336	8.08538	7.32497	4.10052	0.875286	-4.68478	2.80256e-06	8.53376e-05
ENSG00000269502	DMRTC1	2.63194	0	0	2.23699	32.9109	15.5777	12.799	5.67166	4.09811	1.27625	-3.21106	0.00132244	0.0100384
ENSG00000229060	AL451124.1	0	0	0	0	1.79374	7.7978	0.946684	15.1231	4.09084	1.38746	-2.94843	0.00319387	0.0192675
ENSG00000283259	AC242022.1	13.3274	24.2199	67.3366	42.5918	507.059	1136.45	245.391	566.035	4.0888	0.556123	-7.35233	1.94776e-13	8.94524e-11
ENSG00000257199	AC025161.1	0	0	3.39881	0	11.7068	24.8509	6.64397	9.0702	4.08355	1.02665	-3.97754	6.96322e-05	0.00110339
ENSG00000179133	C10orf67	2.62134	3.50904	17.1729	23.0189	202.627	327.485	52.8497	152.244	4.08133	0.641949	-6.35772	2.04776e-10	3.34169e-08
ENSG00000231858	AC067945.2	0	0	3.06724	0	17.0571	12.5186	12.0487	9.90495	4.0687	0.96386	-4.22126	2.42944e-05	0.000491497
ENSG00000187658	C5orf52	0	0	0	0	1.82164	3.74456	4.78179	23.6361	4.06721	1.1779	-3.45294	0.000554505	0.00526314
ENSG00000169059	VCX3A	46.3587	4.82661	137.19	33.5155	1318.65	841.253	621.553	287.7	4.06087	0.999888	-4.06132	4.87961e-05	0.000834857
ENSG00000279770	LINC00552	2.50874	1.27927	51.8066	9.32122	237.891	377.925	203.379	182.738	4.06069	0.736012	-5.51715	3.44537e-08	2.38711e-06
ENSG00000255753	AC009533.2	0	0	2.23968	0	7.734	16.9253	3.74658	4.1219	4.05949	1.26633	-3.20571	0.00134729	0.0101816
ENSG00000163623	NKX6-1	0	0	3.21947	1.04691	16.3162	29.3111	10.1576	16.0402	4.05825	0.925316	-4.3858	1.15558e-05	0.000269786
ENSG00000173253	DMRT2	0	0	2.25362	1.3174	24.5829	16.6087	9.57829	9.0545	4.05391	0.988043	-4.10297	4.07873e-05	0.000730084
ENSG00000287325	AC138647.2	0	0	0	0	5.43737	1.05664	3.70632	46.9107	4.05264	1.51392	-2.67691	0.00743037	0.0357271
ENSG00000232832	LMLN-AS1	0	0	2.11356	1.0069	13.0013	21.6234	6.50176	10.5583	4.0515	1.02484	-3.95332	7.70757e-05	0.00118955
ENSG00000176092	CRYBG2	0	0	2.75447	2.54597	39.8251	13.0103	26.1952	48.8144	4.04355	0.994778	-4.06478	4.80787e-05	0.0008261
ENSG00000260738	LINC00554	0	0	6.06585	0	16.6204	41.0696	21.9545	14.7658	4.04308	0.867726	-4.65939	3.1714e-06	9.41406e-05
ENSG00000237804	HNRNPA1P39	0	0	2.14039	0	16.7844	5.24996	5.55947	3.68773	4.04287	1.32703	-3.04655	0.00231488	0.0151999
ENSG00000161973	CCDC42	0	0	15.8252	3.24643	59.6709	135.212	41.5604	257.572	4.03843	1.05182	-3.83945	0.00012331	0.00170209
ENSG00000142698	C1orf94	0	1.70216	3.7664	1.38669	32.8272	35.851	13.5359	199.022	4.01422	0.742758	-5.40448	6.49956e-08	4.00283e-06
ENSG00000225446	LINC01763	0	0	1.50138	1.48444	18.2189	15.9282	9.71353	16.8703	4.01311	0.847633	-4.73449	2.19609e-06	7.00718e-05
ENSG00000212710	CTAGE1	0	0	6.74542	1.98531	44.1458	52.6752	17.8845	84.4744	4.0088	0.683104	-5.8685	4.39743e-09	4.23259e-07
ENSG00000168070	MAJIN	10.9916	1.21445	46.5273	11.7681	212.192	454.151	179.382	167.441	4.00207	0.735795	-5.43912	5.35457e-08	3.42224e-06
ENSG00000141255	SPATA22	10.0926	1.55371	119.815	20.0839	388.217	1027.78	393.086	808.032	3.99795	0.885191	-4.51648	6.28759e-06	0.000164203
ENSG00000140067	FAM181A	0	1.106	4.50287	0	7.71986	56.0785	8.41455	113.096	3.99541	0.894306	-4.4676	7.91002e-06	0.000199132
ENSG00000133980	VRTN	0.807267	0.823162	5.67072	2.6487	34.9473	59.6613	29.5106	35.0356	3.99517	0.555889	-7.187	6.62326e-13	2.59664e-10
ENSG00000231989	PPP1R2B	0	1.17881	3.89885	2.00004	17.8303	62.9117	8.09886	138.375	3.99495	0.803422	-4.97242	6.61229e-07	2.62111e-05
ENSG00000063015	SEZ6	0	0.954881	2.08499	0.984497	21.1289	16.4292	11.2916	8.17163	3.98887	0.905261	-4.40632	1.05143e-05	0.00024964
ENSG00000259831	LINC00567	0	2.43956	22.9731	1.02037	108.088	147.362	64.2242	103.448	3.98881	0.733494	-5.43809	5.3855e-08	3.43518e-06
ENSG00000273111	LYPD4	4.53263	2.36062	86.9102	14.7664	411.834	589.217	292.056	718.447	3.9839	0.929544	-4.28587	1.82027e-05	0.000390903
ENSG00000204616	TRIM31	1.37606	3.17954	0	0.580591	15.9692	10.4408	12.8788	24.4799	3.97491	0.920943	-4.31613	1.5879e-05	0.000350123
ENSG00000128692	EIF2S2P4	3.35763	0	0	0	9.53301	21.1824	8.34971	7.69736	3.97101	1.17199	-3.38826	0.000703377	0.0062969
ENSG00000226695	ANKRD20A10P	0	0	2.86691	0.990527	13.5237	32.7079	2.68007	6.52951	3.96712	1.13838	-3.48489	0.000492337	0.00481816
ENSG00000196361	ELAVL3	1.10925	22.4081	33.8429	5.66417	239.447	231.083	211.666	67.1341	3.96631	0.854852	-4.63976	3.48808e-06	0.000101114
ENSG00000273644	AC215522.1	0	0	1.07739	0	3.91281	10.2931	1.83305	3.73872	3.9643	1.36129	-2.91216	0.00358939	0.0209803
ENSG00000244171	PBX2P1	2.46497	2.55647	2.202	1.02985	20.2698	56.5158	18.6486	18.095	3.96402	0.900329	-4.40285	1.06837e-05	0.000253105
ENSG00000260442	ATP2A1-AS1	0	0	2.2504	0	9.31579	14.0413	3.01752	7.60196	3.96252	1.23018	-3.22109	0.00127706	0.00977262
ENSG00000203492	AL645937.1	0	0	0	0	1.10854	6.69942	1.53358	8.89782	3.96239	1.3465	-2.94272	0.0032534	0.0195715
ENSG00000224963	U82695.1	0	0.845762	0	2.51714	17.6497	6.16921	5.43745	3.82054	3.95931	1.28492	-3.08135	0.00206062	0.0139199
ENSG00000260759	AP001120.1	0	2.40732	3.07401	0	2.06135	61.9977	0	339.664	3.9573	1.54791	-2.55655	0.0105716	0.0461954
ENSG00000274391	TPTE	19.8166	9.34119	413.219	122.493	1675.91	3399.8	1499.1	1457.36	3.95633	0.910777	-4.3439	1.39973e-05	0.000317338
ENSG00000187600	LINC02583	0	0	1.96556	1.79581	1.58602	34.2591	11.0083	18.9909	3.9554	0.99995	-3.95559	7.63449e-05	0.00118281
ENSG00000285930	AC015813.8	0	0	4.17125	0	13.6829	30.6605	6.42323	8.95968	3.95219	1.06918	-3.69649	0.000218603	0.00260283
ENSG00000198883	PNMA5	13.7723	8.81208	74.7606	44.9592	722.423	544.052	393.919	223.167	3.94932	0.527292	-7.48983	6.89654e-14	3.88965e-11
ENSG00000011590	ZBTB32	0	1.67209	24.3566	0.665948	71.8539	168.679	49.8298	273.328	3.94863	1.06654	-3.70229	0.000213665	0.00256207
ENSG00000129673	AANAT	0	0.842664	2.1629	3.43957	20.134	39.0848	21.5772	18.5307	3.94821	0.737958	-5.35018	8.78691e-08	5.07148e-06
ENSG00000120498	TEX11	28.6759	21.7703	145.485	53.81	1047.95	1135.06	702.947	335.557	3.94104	0.500469	-7.8747	3.4157e-15	3.22964e-12
ENSG00000280081	LINC01667	13.5933	14.2901	42.6067	5.87916	346.922	310.033	219.417	298.563	3.93902	0.573735	-6.86558	6.62224e-12	1.68962e-09
ENSG00000109061	MYH1	0	0	2.14188	0	7.7222	11.3462	6.5579	37.9144	3.9332	1.32702	-2.96393	0.00303733	0.0185989
ENSG00000237510	GPAT2P1	2.37142	0	18.9484	16.9305	192.19	137.879	112.991	71.9524	3.93095	0.763546	-5.14828	2.62893e-07	1.24078e-05
ENSG00000280890	ELDR	0	0	1.03688	0	8.24322	5.43115	1.822	9.1641	3.9287	1.35362	-2.90236	0.00370365	0.0214493
ENSG00000250451	HOXC-AS1	0	1.15527	1.9487	0.874598	23.0079	14.6249	8.88055	8.11808	3.92708	0.887055	-4.4271	9.55076e-06	0.000231902
ENSG00000239620	PRR20G	1.24387	0	34.0948	13.1875	258.849	156.688	141.365	59.6783	3.92275	0.806028	-4.86676	1.13443e-06	4.08396e-05
ENSG00000130433	CACNG6	1.21504	1.20721	2.75756	3.47925	37.8537	30.4477	35.4513	13.1727	3.91871	0.625753	-6.26239	3.79112e-10	5.53986e-08
ENSG00000248717	LINC02222	0	0	1.05527	0	2.10279	10.6854	2.76687	41.0152	3.91661	1.16594	-3.3592	0.000781686	0.00680651
ENSG00000272515	AL355578.1	1.06344	0	0	0	2.63056	9.77836	2.67917	3.51018	3.91456	1.32144	-2.96234	0.00305312	0.0186529
ENSG00000086967	MYBPC2	13.8674	0	0.778696	2.18346	30.5793	15.8224	25.196	9.26641	3.9132	0.866217	-4.51758	6.25516e-06	0.000163489
ENSG00000271776	AL445209.1	0	0	8.07549	0	17.7781	64.8105	13.6675	77.1246	3.91086	0.845132	-4.62751	3.70094e-06	0.000105946
ENSG00000225362	CT62	0	0	1.96483	1.02302	8.33939	27.1312	5.7025	163.251	3.90867	1.05847	-3.69275	0.000221844	0.00262876
ENSG00000167195	GOLGA6C	0	0	4.39402	0	16.3569	19.4758	14.2011	90.0738	3.899	1.02083	-3.81942	0.000133766	0.00181524
ENSG00000260073	AC023824.1	0	0	0	0	2.01427	4.48136	2.70262	5.50819	3.89383	1.42994	-2.72308	0.00646767	0.0323871
ENSG00000259540	AC027020.1	0	0	2.81025	1.30565	23.4381	17.5528	2.52945	9.13241	3.89173	1.10618	-3.51818	0.000434516	0.00439271
ENSG00000188755	TBC1D3P2	0	0	2.92615	0	6.84475	19.5255	0.882219	44.9432	3.889	1.30152	-2.98805	0.00280762	0.0175431
ENSG00000214255	RPS2P6	0	1.28159	3.32024	0	19.0644	23.9327	7.47173	13.0898	3.88308	0.894502	-4.34106	1.418e-05	0.000320126
ENSG00000166796	LDHC	13.4035	2.4119	71.3028	10.6082	271.746	649.677	164.651	1136.68	3.88237	0.84402	-4.59985	4.2279e-06	0.000117671
ENSG00000249490	LINC02146	0	0	0.417709	1.51893	3.73165	13.5564	2.75969	3.69078	3.88111	1.23405	-3.14503	0.00166072	0.0118774
ENSG00000219294	PIP5K1P1	0	0	6.36719	1.00959	24.8649	46.0758	13.7308	30.4325	3.87931	0.822003	-4.71934	2.36611e-06	7.46475e-05
ENSG00000276399	FLJ36000	20.3228	11.1699	50.2523	17.2755	413.981	485.768	198.48	232.626	3.87806	0.440544	-8.80288	1.33345e-18	5.35846e-15
ENSG00000176988	FMR1NB	7.64515	6.97858	131.587	43.9114	814.795	691.847	593.287	261.873	3.87686	0.744224	-5.20927	1.89585e-07	9.54234e-06
ENSG00000260498	AC126696.3	0	0	0	1.66219	3.43226	5.05135	14.3069	16.8406	3.87315	1.2614	-3.07051	0.00213694	0.0143091
ENSG00000138892	TTLL8	0	0.863048	6.62592	0.703594	15.9665	52.3141	29.3037	60.5356	3.87224	0.885592	-4.37248	1.22841e-05	0.000284108
ENSG00000271321	CTAGE6	0	5.87196	0	0	22.7312	26.3668	12.5003	58.5313	3.86201	0.990636	-3.89851	9.67861e-05	0.00142197
ENSG00000184814	PRR23B	1.24549	0	10.9564	0	45.2626	60.7966	29.1353	18.2317	3.86184	0.765205	-5.0468	4.49262e-07	1.93086e-05
ENSG00000176563	CNTD1	4.27377	1.19187	39.6522	1.98904	152.438	274.033	90.3429	282.612	3.85934	0.974789	-3.95916	7.52151e-05	0.00116925
ENSG00000223638	RFPL4A	0	3.74864	18.2634	2.01599	74.2927	138.569	49.8612	20.7511	3.85641	0.915545	-4.21214	2.52958e-05	0.000506358
ENSG00000214992	AKAP17BP	0	1.23114	30.7973	11.2418	136.603	241.016	97.8727	57.7906	3.85508	0.819572	-4.70377	2.55399e-06	7.94436e-05
ENSG00000131747	TOP2A	104.089	24.7035	702.299	173.507	3525.99	5480.35	1840.99	2220.25	3.84723	0.939641	-4.09436	4.23332e-05	0.000749969
ENSG00000200972	RNU5A-8P	1.06533	1.37609	4.51109	3.94439	28.629	56.2726	35.3993	20.3071	3.8457	0.6387	-6.02113	1.73202e-09	1.87478e-07
ENSG00000179420	OR6W1P	0	0	2.19893	0	6.5593	9.44602	8.3162	5.44808	3.84425	1.15921	-3.31626	0.000912299	0.00764362
ENSG00000123496	IL13RA2	9.26989	10.8529	70.0575	15.8264	404.591	451.343	300.327	147.052	3.84117	0.58714	-6.54217	6.06316e-11	1.13325e-08
ENSG00000198670	LPA	5.09313	12.0645	29.0522	4.13534	279.659	145.597	116.503	70.9296	3.83916	0.772213	-4.97163	6.63926e-07	2.62532e-05
ENSG00000225510	PCDH8P1	1.70467	0.818622	5.90107	0.693773	36.1154	56.379	6.786	31.3152	3.83641	0.838583	-4.57487	4.76519e-06	0.000129385
ENSG00000287305	AC010969.3	0	0	0	1.00237	5.06507	8.6166	0.914026	4.87731	3.83465	1.29987	-2.95003	0.00317743	0.0191879
ENSG00000255875	PABPN1P2	0	0	0	2.08972	7.60479	2.89136	13.2602	4.94038	3.83228	1.27499	-3.00574	0.00264931	0.0168187
ENSG00000274219	AC025588.4	0	0	0	0	3.56314	4.43297	0.911041	4.67144	3.82852	1.39344	-2.74754	0.00600444	0.0306593
ENSG00000243648	AC109454.1	0	0	0	0	2.82665	5.96184	0	3.63714	3.82763	1.49872	-2.55393	0.0106516	0.0464496
ENSG00000121742	GJB6	0	0	0	0	1.95424	3.94655	2.82546	6.16249	3.82719	1.31517	-2.91003	0.00361394	0.021074
ENSG00000282815	TEX13C	4.68005	4.96138	54.8959	47.3501	546.488	422.738	226.969	127.155	3.82317	0.618324	-6.18312	6.28464e-10	8.38335e-08
ENSG00000235489	DBF4P1	1.05626	0	1.92074	0.993212	9.61137	27.8351	7.17792	34.008	3.8201	0.885976	-4.31175	1.61969e-05	0.000355943
ENSG00000175509	ACRP1	0	0	2.30834	1.05834	17.5752	8.72114	9.72957	4.94339	3.80874	1.07741	-3.53508	0.000407656	0.00418968
ENSG00000269058	CALR3	0	1.22737	18.5699	7.98091	58.641	182.157	56.8466	204.262	3.80657	0.744085	-5.11578	3.12445e-07	1.4288e-05
ENSG00000256799	AC005832.3	0	0	1.02878	0	5.97558	5.50836	2.73705	5.2021	3.79979	1.28591	-2.95493	0.00312742	0.0189838
ENSG00000227172	AC011290.1	0	2.26848	0	1.00934	15.052	11.1145	8.06813	6.11067	3.79896	1.0058	-3.77707	0.000158685	0.00206034
ENSG00000156009	MAGEA8	1.09834	0	4.98312	14.3489	87.8219	64.1412	59.5139	22.9819	3.79616	0.595639	-6.37325	1.85063e-10	3.05097e-08
ENSG00000229373	LINC00452	0	0	16.2008	6.32263	56.2901	144.091	41.3776	40.9321	3.79588	0.859414	-4.41683	1.00159e-05	0.000239935
ENSG00000135577	NMBR	0	0	0.771871	1.48427	4.37383	24.9024	1.33611	19.1381	3.79165	1.20953	-3.1348	0.0017197	0.0121693
ENSG00000228748	AL450306.1	1.94694	2.12074	9.5284	2.61423	11.1743	119.456	39.982	279.258	3.7905	0.740508	-5.11879	3.07501e-07	1.41021e-05
ENSG00000227352	ARHGEF7-AS1	0	0	1.15333	0	2.8275	6.91481	4.6357	5.25122	3.78872	1.25141	-3.02757	0.0024653	0.0159579
ENSG00000258385	AL391516.1	0	0	2.63311	0.95333	22.0346	12.3365	7.661	5.28861	3.78385	1.03331	-3.66188	0.000250376	0.00289535
ENSG00000288060	AL355338.1	0	0	1.08714	0	4.5541	4.87677	4.64092	3.74749	3.78266	1.41485	-2.67355	0.0075054	0.0359964
ENSG00000286256	AC084871.3	0	1.41957	0	0	4.52607	7.72753	2.11134	8.37847	3.77961	1.32367	-2.8554	0.00429822	0.0240312
ENSG00000226485	RBM22P3	0	0	16.1634	0	44.7694	94.4005	28.6363	106.375	3.77942	1.25429	-3.0132	0.00258508	0.0164858
ENSG00000226435	ANKRD18DP	2.74444	10.7168	22.8191	3.82286	87.0818	245.357	67.4022	157.608	3.77685	0.627011	-6.02358	1.70599e-09	1.86467e-07
ENSG00000234089	AC099654.1	1.08141	0	0.976344	0.924054	11.1377	14.8293	5.81172	642.584	3.77581	1.15326	-3.27403	0.00106024	0.00851052
ENSG00000224763	FDPSP8	0	1.25902	0	0	3.79232	9.36564	0.925047	4.31338	3.77188	1.34814	-2.79783	0.00514472	0.027451
ENSG00000226851	AC004112.1	0	0	1.05931	0	8.04882	3.12724	2.73296	3.88314	3.76997	1.25717	-2.99878	0.00271067	0.0171103
ENSG00000225493	LINC01107	0	0	0	0	3.53313	2.90511	1.90798	16.6379	3.76824	1.33571	-2.82116	0.00478501	0.0259485
ENSG00000267643	AP005264.3	0	0	3.3524	2.01365	11.8319	37.8883	7.36398	28.7684	3.76572	0.851559	-4.42215	9.77233e-06	0.000236211
ENSG00000141096	DPEP3	13.4125	9.98978	177.687	78.4309	1151.31	1160.8	542.908	418.492	3.76442	0.723585	-5.20246	1.96664e-07	9.83259e-06
ENSG00000004838	ZMYND10	4.12824	5.26915	33.3259	12.3312	169.191	335.743	104.145	728.821	3.76317	0.556299	-6.76465	1.33627e-11	3.09054e-09
ENSG00000181171	FER1L6-AS1	0	0	0	0	4.36941	2.20893	1.84352	5.28899	3.76184	1.28737	-2.92212	0.00347659	0.0204999
ENSG00000233966	UBE2SP1	0	0	0	0	2.47582	0.947903	4.96504	5.42863	3.76043	1.34107	-2.80406	0.00504641	0.0270522
ENSG00000259556	AC090971.3	1.15496	0	7.33586	1.01971	38.5943	30.6087	30.5963	14.0614	3.75912	0.705089	-5.33142	9.74475e-08	5.52512e-06
ENSG00000286737	AC092168.3	0	0	0	0.985752	2.48903	9.55374	1.77405	20.2838	3.75609	1.33147	-2.82102	0.00478718	0.0259525
ENSG00000179213	SIGLECL1	3.01269	0	9.46975	5.0039	72.7076	61.7997	42.0029	87.0387	3.75537	0.556832	-6.74416	1.53913e-11	3.4845e-09
ENSG00000264359	NEK4P2	1.28335	2.58723	3.41621	3.16407	42.3326	41.8121	22.8557	17.8882	3.75048	0.602713	-6.22267	4.88776e-10	6.77292e-08
ENSG00000186075	ZPBP2	6.23175	2.28814	104.594	14.6499	307.125	777.968	205.252	561.487	3.74676	1.00348	-3.73376	0.000188642	0.00233338
ENSG00000171560	FGA	0	0	3.13638	3.48256	17.5121	49.6047	6.03812	29.9871	3.74623	0.839301	-4.46352	8.06247e-06	0.000202021
ENSG00000231208	ZBTB46-AS1	0	2.63426	1.13481	3.08437	32.501	18.9162	17.9283	11.9537	3.74593	0.714844	-5.24021	1.60397e-07	8.34375e-06
ENSG00000154493	C10orf90	0	0	4.39344	0	6.15259	1.66386	14.0415	41.2896	3.74423	1.45306	-2.57678	0.00997244	0.0443238
ENSG00000164082	GRM2	23.8603	26.7225	69.2813	85.7729	796.334	785.522	467.25	381.979	3.73902	0.425422	-8.78898	1.5093e-18	5.39121e-15
ENSG00000250799	PRODH2	0	0	0	1.48986	4.83612	8.13992	1.39882	4.57846	3.73656	1.3222	-2.82601	0.00471317	0.025648
ENSG00000123569	H2BW1	0	0	4.49915	0	10.7236	19.1288	15.3015	3.83489	3.73597	1.28969	-2.89679	0.00376997	0.021765
ENSG00000268336	SIGLEC20P	2.50888	0	5.56806	2.05553	50.0631	37.9319	14.1611	12.5141	3.73154	0.726744	-5.1346	2.82749e-07	1.31356e-05
ENSG00000250666	LINC01596	0	0	5.51245	0	10.5244	34.1161	11.1676	20.1206	3.72908	0.915725	-4.07227	4.6557e-05	0.000804802
ENSG00000249937	LINC02223	0.986332	1.10303	0.678145	1.04609	15.6852	10.6725	8.81734	10.2777	3.72813	0.950267	-3.92325	8.7364e-05	0.00131639
ENSG00000162006	MSLNL	0	0	4.01955	0.992918	30.6947	13.7729	7.56694	6.2026	3.72536	1.19758	-3.11073	0.00186624	0.0129107
ENSG00000268940	CT45A1	0	0	30.786	10.1838	102.434	196.004	110.674	53.377	3.72274	0.943026	-3.94766	7.89202e-05	0.00121228
ENSG00000261296	AC126323.6	0.604698	13.2859	13.7154	0.56524	71.6917	134.26	58.344	127.09	3.71964	0.722399	-5.14902	2.61857e-07	1.23797e-05
ENSG00000261275	AC092447.8	1.19789	0	44.2212	3.07487	150.697	268.66	61.4091	406.333	3.7177	1.05545	-3.52238	0.000427693	0.00433909
ENSG00000231043	AC007238.1	1.20416	0	6.5159	0	25.0297	45.7858	6.61885	27.8372	3.71682	0.834437	-4.45428	8.41736e-06	0.000208636
ENSG00000213438	YBX2P1	0	0	2.31657	0	4.23981	14.2683	3.88503	15.99	3.71241	1.1263	-3.29612	0.000980312	0.00802523
ENSG00000234511	C5orf58	10.0533	6.01422	86.3581	19.2984	181.792	716.477	319.118	415.805	3.71027	0.727662	-5.09889	3.41654e-07	1.53187e-05
ENSG00000260423	LINC02367	18.5706	3.44841	46.0324	25.844	183.284	614.757	122.552	281.055	3.70753	0.605374	-6.12437	9.1045e-10	1.10868e-07
ENSG00000255181	CCDC166	0	0	0	1.05176	5.91935	7.26727	0	11.1568	3.70237	1.35892	-2.72449	0.00644001	0.0323035
ENSG00000236301	MRGPRG-AS1	0	0	0	0	1.46147	9.147	0.772582	27.9716	3.70003	1.26628	-2.92196	0.00347832	0.020505
ENSG00000227538	HNRNPFP1	0	0	0	1.03076	2.67732	3.95658	6.53546	5.09706	3.69544	1.30553	-2.83061	0.00464587	0.0253746
ENSG00000247213	LINC01498	0.438882	0	1.98211	3.38538	13.5857	20.359	11.2656	30.3567	3.68726	0.77929	-4.73157	2.22795e-06	7.0845e-05
ENSG00000151005	TKTL2	1.13285	2.41351	44.7389	7.01943	139.667	336.315	60.4243	562.35	3.68378	0.945995	-3.89408	9.8572e-05	0.00144197
ENSG00000165588	OTX2	0	0	1.01538	4.30313	17.5326	11.7414	18.2003	5.36145	3.68287	1.01217	-3.6386	0.000274126	0.0031056
ENSG00000232553	CLK2P1	0	0	7.7306	1.02928	22.4566	44.809	18.8411	95.8542	3.68133	0.791829	-4.64914	3.33317e-06	9.80373e-05
ENSG00000241721	SUMO1P1	0	0	1.18214	2.08593	10.0905	13.3157	9.67173	9.93651	3.68029	0.9593	-3.83643	0.000124834	0.00171723
ENSG00000227879	PSPC1P1	0	0	2.17509	1.01262	10.4463	17.062	4.67832	27.104	3.67618	0.966055	-3.80535	0.000141604	0.00189127
ENSG00000185056	C5orf47	5.21827	3.42379	100.258	56.5246	528.125	792.565	264.634	335.28	3.67219	0.951467	-3.8595	0.000113619	0.00159782
ENSG00000249787	AC113385.1	0	0	0	0	3.81357	4.1009	0	12.6916	3.67187	1.43099	-2.56597	0.0102888	0.045248
ENSG00000224582	LINC01015	0	0	12.0193	0	4.66447	78.4545	30.6141	167.769	3.67063	1.33204	-2.75564	0.00585777	0.030145
ENSG00000110944	IL23A	1.40582	1.85042	7.47168	2.35354	26.9059	68.8197	32.4705	34.7437	3.6669	0.595017	-6.16268	7.1522e-10	9.19716e-08
ENSG00000186897	C1QL4	0	2.60612	2.31736	0	16.4833	13.4841	14.5464	18.2728	3.66521	0.93341	-3.92669	8.61216e-05	0.00130166
ENSG00000077935	SMC1B	40.8414	17.1123	285.466	141.04	1338.58	2473.78	800.022	895.493	3.66505	0.85831	-4.27008	1.95404e-05	0.000413305
ENSG00000180336	MEIOC	38.3132	58.0033	229.569	111.084	1176.88	2144.54	828.254	1196.65	3.66087	0.484321	-7.55877	4.06884e-14	2.39053e-11
ENSG00000260394	LINC02867	5.73259	1.13106	0.993237	1.82449	43.3861	22.4837	22.975	13.9271	3.65926	0.657187	-5.56807	2.57572e-08	1.88354e-06
ENSG00000090402	SI	0	0	8.77504	2.9923	34.3701	62.984	20.6122	61.1671	3.65839	0.758853	-4.82094	1.42883e-06	4.92444e-05
ENSG00000213892	CEACAM16	0	0	0	1.06546	2.47649	5.95067	4.58765	3.55389	3.65597	1.29321	-2.82705	0.00469785	0.025589
ENSG00000214897	PNMA6E	20.7145	4.91179	87.8544	42.311	719.423	334.04	420.743	182.343	3.65463	0.693863	-5.26707	1.38615e-07	7.41465e-06
ENSG00000251461	AC091133.4	0	0	4.65751	0	14.2682	16.5914	12.2249	5.27983	3.64605	0.982387	-3.71142	0.000206098	0.00249647
ENSG00000279243	LINC02736	1.9579	6.2168	7.87611	2.64647	72.6043	80.9545	30.8499	28.447	3.64307	0.574847	-6.33747	2.33573e-10	3.68083e-08
ENSG00000075886	TUBA3D	31.1244	9.92748	191.877	110.539	1017.2	1540.37	659.202	994.377	3.63927	0.634219	-5.73819	9.56919e-09	8.22541e-07
ENSG00000217442	SYCE3	3.80477	0	9.52768	9.60072	87.4911	103.385	34.5408	84.3381	3.63827	0.590177	-6.1647	7.06157e-10	9.14067e-08
ENSG00000253603	CERNA3	0	1.30227	1.12424	0	9.01429	4.99131	7.45711	4.42921	3.63724	1.2252	-2.9687	0.00299065	0.0183796
ENSG00000167858	TEKT1	0	0	3.97039	1.84729	24.4869	28.3475	2.79939	106.486	3.63131	1.0162	-3.57343	0.000352335	0.00376558
ENSG00000230442	ASB15-AS1	0	0	0	0	0	4.17392	3.70368	21.4274	3.62918	1.25128	-2.90038	0.00372716	0.0215699
ENSG00000286080	AC011477.7	3.66342	5.07874	21.6812	2.03457	81.7783	164.761	56.954	233.152	3.62592	0.544397	-6.66044	2.73016e-11	5.69658e-09
ENSG00000244588	RAD21L1	7.10209	0	38.4948	4.42887	178.5	180.359	85.37	120.168	3.61795	0.73823	-4.90085	9.54224e-07	3.54231e-05
ENSG00000270946	CT45A9	0	0	9.35234	2.03179	38.2196	33.9731	35.8249	14.4171	3.61743	0.891975	-4.05552	5.00221e-05	0.000852057
ENSG00000108244	KRT23	1.12384	5.74335	2.64728	0	6.0218	59.5318	5.10977	149.274	3.61742	0.911746	-3.96757	7.26093e-05	0.00113644
ENSG00000125514	LINC00029	0	3.54844	4.88588	2.48948	35.1349	47.0824	15.6489	32.4506	3.61355	0.722167	-5.00375	5.62254e-07	2.29423e-05
ENSG00000206043	C18orf63	14.2914	8.99761	175.71	53.1896	653.61	1130.85	535.274	411.425	3.61276	0.710768	-5.08289	3.71733e-07	1.64381e-05
ENSG00000187984	ANKRD19P	0	0	7.83991	3.89327	8.59003	70.103	8.62268	144.624	3.60991	0.945938	-3.81623	0.000135509	0.00182962
ENSG00000147127	RAB41	2.24297	2.17344	17.7696	9.74948	127.234	125.972	59.3934	31.1638	3.60874	0.585164	-6.16706	6.95708e-10	9.09172e-08
ENSG00000235438	ESRRAP2	0.55403	3.40968	8.53004	15.136	70.8462	101.95	57.1979	74.6433	3.60751	0.57797	-6.24169	4.32864e-10	6.12527e-08
ENSG00000170893	TRH	0	2.54884	2.17544	0	13.9333	16.6116	11.2036	8.23671	3.60733	0.935488	-3.85609	0.000115214	0.0016153
ENSG00000126752	SSX1	3.53885	0	39.3365	13.2102	202.869	197.207	116.362	60.5052	3.6058	0.764745	-4.71504	2.41667e-06	7.61678e-05
ENSG00000161609	KASH5	16.1847	8.28259	176.504	70.6782	918.32	1115.26	448.167	651.11	3.6033	0.857946	-4.19991	2.67018e-05	0.000528251
ENSG00000285600	AC023593.1	1.19938	1.24365	1.07431	1.01939	16.2232	18.5647	6.44855	9.92017	3.60087	0.887457	-4.05752	4.95964e-05	0.000845439
ENSG00000269761	AC025278.2	0	1.29184	20.1155	4.15118	75.1119	115.183	45.2985	121.114	3.59813	0.62986	-5.7126	1.11266e-08	9.36379e-07
ENSG00000215115	CXorf49	3.63501	2.42925	43.8814	43.718	346.904	308.915	195.87	88.6276	3.59773	0.666723	-5.39614	6.80882e-08	4.15351e-06
ENSG00000278505	C17orf78	0	0	3.3265	0	6.04808	11.9163	12.7505	9.2859	3.59712	0.987545	-3.64248	0.000270019	0.00307169
ENSG00000118434	SPACA1	0	1.15044	4.7458	1.93886	14.758	45.9356	13.8444	112.593	3.59297	0.803642	-4.47086	7.79074e-06	0.0001969
ENSG00000133101	CCNA1	3.49575	2.53364	17.033	9.16105	115.121	141.276	41.1609	430.693	3.59155	0.53146	-6.75788	1.40021e-11	3.21529e-09
ENSG00000287947	AC116361.1	0	0	0	0	2.27797	3.35715	1.75778	4.93766	3.57287	1.36779	-2.61214	0.00899767	0.0411052
ENSG00000205097	FRG2	0	1.20429	1.0155	2.01223	12.7176	17.7968	8.14362	4.23425	3.57257	1.12835	-3.16619	0.0015445	0.0112642
ENSG00000235343	LINC01665	0	0	2.01551	1.94323	4.85273	25.7367	8.04141	19.0473	3.5697	0.943768	-3.78239	0.00015533	0.00202743
ENSG00000273313	RBAKDN	0	0	14.6104	0	12.8024	98.0394	17.74	326.562	3.56592	1.41047	-2.52818	0.0114655	0.0489891
ENSG00000205856	C22orf42	0	0	0	0	2.17092	4.68496	0.752953	47.3044	3.56074	1.39441	-2.55358	0.0106621	0.0464766
ENSG00000233395	LINC00841	0	0	0.568593	1.26841	2.48496	10.5248	3.79862	30.2337	3.555	1.30279	-2.72876	0.00635721	0.031983
ENSG00000215644	GCGR	0	0	4.89607	2.47722	40.0513	13.0341	18.3418	10.3909	3.55467	0.834642	-4.25892	2.05417e-05	0.000428535
ENSG00000105261	OVOL3	0	0	4.69825	0	12.4795	21.2676	6.71296	9.81081	3.55443	0.940269	-3.78023	0.000156685	0.0020418
ENSG00000177455	CD19	6.65469	5.65517	7.27469	0	87.6248	45.1493	39.4718	27.1144	3.55404	0.575614	-6.17433	6.6443e-10	8.7184e-08
ENSG00000259720	AC009562.1	0	0.637948	7.88201	2.25456	22.8719	40.1044	9.55819	22.3599	3.5467	0.829276	-4.27686	1.89544e-05	0.000403541
ENSG00000158525	CPA5	2.39077	0	0	1.38463	16.8307	16.9676	2.13057	95.8439	3.54455	1.16027	-3.05493	0.0022511	0.0148783
ENSG00000234387	AC073188.5	2.5609	0	9.05623	1.02637	43.0559	51.1344	17.1109	55.286	3.54449	0.604659	-5.86197	4.57416e-09	4.37649e-07
ENSG00000251697	RN7SKP24	0	0	2.34169	0	7.60177	6.88817	5.56462	8.4656	3.54233	1.18267	-2.9952	0.00274263	0.0172713
ENSG00000287765	AL136295.22	0	0	1.07804	0	5.04159	4.07779	2.80165	10.7071	3.54054	1.20649	-2.93457	0.00334013	0.0199255
ENSG00000227375	DLG1-AS1	1.09783	0	3.10815	2.11617	16.9045	36.8705	3.68424	31.4786	3.54045	0.943907	-3.75084	0.000176241	0.0022245
ENSG00000216436	H2AC2P	0	0	0	0	0.824465	3.49879	2.93463	17.9345	3.54037	1.21497	-2.91396	0.00356881	0.0208942
ENSG00000156219	ART3	40.4366	46.1767	209.136	103.583	934.149	1973.91	550.546	603.493	3.53033	0.493031	-7.16047	8.04022e-13	2.971e-10
ENSG00000287548	AC021269.3	0	0	7.20528	3.0374	27.0063	54.5618	11.8513	44.7095	3.52869	0.720956	-4.89446	9.85774e-07	3.6468e-05
ENSG00000171989	LDHAL6B	1.08878	3.53951	40.4403	1.97683	150.691	206.389	51.6207	240.625	3.52478	0.97549	-3.61334	0.000302277	0.00334858
ENSG00000259701	AC020891.3	0	0	2.31052	0	2.06095	15.7827	1.89193	39.016	3.52338	1.23193	-2.86006	0.00423559	0.0237679
ENSG00000285952	AC020663.4	0	2.5833	2.23054	4.14629	31.4616	37.2067	9.46901	14.6384	3.51663	0.767431	-4.58235	4.59789e-06	0.000125691
ENSG00000260281	ITFG1-AS1	0.997413	0	5.185	0	10.5503	35.4308	8.48295	69.5917	3.51513	0.827674	-4.247	2.16654e-05	0.000445903
ENSG00000226921	LINC00454	1.41491	0	21.0134	0	59.4622	92.1319	35.6687	50.0335	3.51411	0.914231	-3.84378	0.000121153	0.00168098
ENSG00000253470	AC016074.1	0	0	1.08928	0	1.97119	6.98257	2.7908	14.964	3.51393	1.19053	-2.95156	0.00316173	0.0191374
ENSG00000255790	AC078950.1	0	0	2.12831	0	6.48464	8.26763	4.34314	8.15575	3.50791	1.14352	-3.06764	0.00215759	0.0144204
ENSG00000137707	BTG4	0.935671	0	13.1471	9.69093	51.3094	114.615	37.7641	87.019	3.50297	0.650237	-5.38722	7.1556e-08	4.32403e-06
ENSG00000243902	ELFN2	0	0	1.09151	1.02412	8.22706	5.17383	5.58702	6.03118	3.50191	1.15679	-3.02726	0.00246785	0.0159631
ENSG00000164256	PRDM9	3.04611	1.06938	56.3908	5.25648	244.276	209.589	95.3837	81.1064	3.50027	0.863399	-4.05406	5.03371e-05	0.00085621
ENSG00000259907	AC004817.2	0	0	0	0	0	6.11405	0.932259	44.276	3.49629	1.24831	-2.80083	0.00509716	0.0272742
ENSG00000228836	CT45A5	0	0	2.06193	20.2036	35.3253	124.897	31.1333	39.3516	3.49259	1.03994	-3.35845	0.000783809	0.00681761
ENSG00000183035	CYLC1	0	0	0.817947	0.851323	2.26868	12.7963	1.53023	55.3803	3.49247	1.36166	-2.56487	0.0103213	0.0453602
ENSG00000231609	AC007098.1	0	0	2.84814	0.444359	7.33098	7.55583	7.91016	4.81274	3.48651	1.07091	-3.25565	0.00113135	0.00892892
ENSG00000286160	AC113618.2	0	0	2.23444	0	2.73301	11.7445	4.65878	3.92065	3.48601	1.3469	-2.58817	0.00964887	0.0432203
ENSG00000251172	AC117470.1	0	0	2.30021	0	5.64642	8.89706	4.64335	7.35311	3.4809	1.22762	-2.83549	0.00457553	0.0250928
ENSG00000254207	AC100797.1	0	0	0	2.11847	12.0533	3.63214	2.89874	3.83728	3.48059	1.25974	-2.76295	0.00572815	0.0296488
ENSG00000260615	RPL23AP97	0	0	2.30052	1.0294	7.96592	13.8589	6.63634	5.47942	3.47874	1.04033	-3.3439	0.000826105	0.00709717
ENSG00000285042	AC099499.2	0.971294	1.11326	0.882935	1.92792	16.3362	18.9477	6.90295	8.88962	3.47689	0.826327	-4.20764	2.58047e-05	0.000514622
ENSG00000171402	XAGE3	0	0	2.23739	3.25632	20.7253	23.3648	2.79749	4.88627	3.47212	1.0912	-3.18193	0.00146296	0.0108167
ENSG00000226411	AC079355.1	0	0	2.4493	4.20117	23.6069	23.6601	9.97789	12.4345	3.46711	0.809394	-4.28358	1.8391e-05	0.000393576
ENSG00000175175	PPM1E	16.4741	16.5312	86.0427	49.0801	405.204	742.983	252.387	346.664	3.46604	0.509933	-6.79704	1.0679e-11	2.562e-09
ENSG00000266648	SETP3	1.09571	1.20821	0	4.95346	20.9153	27.8902	13.5961	16.7083	3.46462	0.694831	-4.98628	6.15519e-07	2.46817e-05
ENSG00000272046	AL445647.1	1.04617	3.46684	19.7837	10.9754	84.5289	165.482	46.4453	87.9028	3.46327	0.660017	-5.24725	1.5439e-07	8.08361e-06
ENSG00000175305	CCNE2	6.87481	5.0032	38.529	26.3295	178.962	289.663	177.898	146.654	3.46269	0.522805	-6.62329	3.51296e-11	6.9285e-09
ENSG00000254814	AP003031.1	0	0	1.10723	0	0.901201	5.90226	4.63527	14.8585	3.46168	1.18785	-2.91424	0.00356556	0.0208824
ENSG00000279428	AC087164.2	2.42335	0	5.40494	1.0184	28.7811	32.4075	13.0252	12.4565	3.46162	0.735891	-4.70398	2.55134e-06	7.94436e-05
ENSG00000169856	ONECUT1	1.42164	6.34742	21.7972	5.28296	79.7018	132.029	62.1221	94.9063	3.46005	0.656163	-5.27317	1.34089e-07	7.19649e-06
ENSG00000007038	PRSS21	4.03953	2.09454	109.173	24.7712	482.255	431.374	242.931	310.3	3.45917	0.780774	-4.43044	9.40395e-06	0.000229029
ENSG00000233128	LINC01794	0	0	4.00844	1.00072	11.1381	25.7516	7.21964	8.80912	3.45678	0.93176	-3.70995	0.0002073	0.0025082
ENSG00000168509	HJV	0	0	0	0	2.48745	1.63004	2.4086	6.25391	3.45456	1.32847	-2.60039	0.00931167	0.042097
ENSG00000164334	FAM170A	0	0	5.59644	0.936704	25.2977	25.6212	7.24007	49.4355	3.45351	0.785448	-4.39687	1.09824e-05	0.000258655
ENSG00000273786	AC020658.4	0	0	0.882981	0	2.70792	3.64744	4.12746	3.8983	3.45062	1.36084	-2.53567	0.0112234	0.048228
ENSG00000143627	PKLR	1.24142	0	1.08925	0	3.48966	4.08222	16.1281	6.25324	3.44821	1.26703	-2.72148	0.00649903	0.032483
ENSG00000142025	DMRTC2	12.0964	2.33621	148.765	36.2881	604.544	690.115	335.634	333.168	3.44789	0.931688	-3.7007	0.000215009	0.00257203
ENSG00000287535	AC009630.4	1.21244	1.23334	1.06483	1.02091	12.9853	16.6172	7.39192	6.5175	3.44624	0.886523	-3.88737	0.000101337	0.00147212
ENSG00000178762	H2BC2P	0	0	8.05066	3.06702	17.3909	44.3973	30.5212	267.789	3.44313	0.638689	-5.39094	7.00914e-08	4.25862e-06
ENSG00000160886	LY6K	41.2298	17.4853	145.734	51.29	532.122	1046.34	504.669	339.639	3.44071	0.484192	-7.10608	1.19389e-12	4.26459e-10
ENSG00000066405	CLDN18	8.29372	1.77764	10.3846	16.102	107.323	156.192	44.489	38.9706	3.43679	0.532759	-6.45094	1.11161e-10	1.92472e-08
ENSG00000168348	INSM2	0	1.23627	8.68738	2.0974	41.0197	38.4719	20.4508	15.5471	3.43651	0.655503	-5.24254	1.58377e-07	8.26542e-06
ENSG00000265480	KRT18P55	5.12419	3.18679	22.1614	14.3574	116.109	191.386	58.8934	340.96	3.43039	0.486722	-7.04795	1.81577e-12	5.95647e-10
ENSG00000288034	AL049833.4	0	0	3.19772	0	3.94627	22.0242	0.92072	9.12441	3.42989	1.23757	-2.77147	0.00558043	0.029147
ENSG00000234085	AC064862.3	0	0	2.23683	0	2.64092	9.07753	6.63084	6.28794	3.42926	1.19545	-2.8686	0.00412288	0.0232857
ENSG00000124678	TCP11	22.5989	27.6019	75.2204	44.5065	350.378	724.037	310.023	1287.75	3.42789	0.496747	-6.90067	5.17587e-12	1.37515e-09
ENSG00000226252	AL135960.1	0	1.25895	2.15039	0	2.96824	24.4785	0	15.077	3.42643	1.33062	-2.57507	0.010022	0.0444886
ENSG00000146221	TCTE1	5.88745	4.87794	21.0864	6.93808	88.8424	174.464	52.0528	220.011	3.42321	0.539946	-6.33991	2.29905e-10	3.6589e-08
ENSG00000248399	AL645924.1	1.26365	0	1.2285	0	4.7326	9.60005	4.59054	8.80616	3.42001	1.19107	-2.87138	0.00408687	0.0231433
ENSG00000279285	AP005264.5	1.11817	1.22899	9.2038	1.98271	34.7123	59.6297	17.9046	37.4623	3.41999	0.624128	-5.47963	4.26227e-08	2.8187e-06
ENSG00000285712	AC068707.1	0	0	3.20234	0	12.6382	8.59034	5.49782	5.5466	3.4198	1.05312	-3.2473	0.00116507	0.00912008
ENSG00000250417	LINC02116	0	0	3.24744	0	10.3325	9.14325	7.27601	5.16783	3.41544	1.06382	-3.21054	0.00132485	0.0100498
ENSG00000242207	HOXB-AS4	1.99372	0	1.79102	0.821183	16.729	18.805	3.00101	5.95854	3.41507	1.13424	-3.01088	0.00260491	0.0165925
ENSG00000274499	AC012414.6	1.55479	1.68196	18.2633	0	14.6509	157.033	5.12175	95.4402	3.41321	1.32521	-2.5756	0.0100065	0.0444446
ENSG00000267706	AC020922.1	0	0	15.7291	0	58.4179	33.4445	33.4325	126.062	3.40495	0.842304	-4.04242	5.29018e-05	0.000888888
ENSG00000248998	EFL1P2	0	0	3.61575	0.966631	13.5013	15.826	11.2794	7.21167	3.40239	0.892609	-3.81174	0.000137995	0.00185307
ENSG00000198807	PAX9	0.844455	1.95554	0.614516	0	10.0909	7.81728	5.56933	4.08331	3.40101	1.02855	-3.30662	0.000944298	0.00783819
ENSG00000065328	MCM10	12.7583	8.72503	39.8758	14.5403	250.858	283.131	64.8512	81.9759	3.40059	0.56679	-5.99975	1.97627e-09	2.06276e-07
ENSG00000204253	HNRNPCP2	0	2.55448	4.33586	0	12.5984	32.0981	9.33735	12.817	3.39863	0.815634	-4.16686	3.08824e-05	0.000587461
ENSG00000126583	PRKCG	0	1.65208	21.4905	7.9972	87.4166	61.1099	76.6713	43.9173	3.39599	0.689283	-4.92684	8.35686e-07	3.17636e-05
ENSG00000156970	BUB1B	64.7811	20.5406	101.591	119.799	693.946	1324.64	407.234	518.713	3.39312	0.460003	-7.3763	1.62754e-13	7.58291e-11
ENSG00000150676	CCDC83	0	0	4.47483	0.905199	7.17545	32.1259	10.135	142.929	3.39275	0.874266	-3.88069	0.000104162	0.00150027
ENSG00000226527	AP000289.1	0	0	0	1.29738	1.94451	7.17194	2.23074	13.7685	3.39134	1.23558	-2.74474	0.0060558	0.0308578
ENSG00000259203	AC016044.1	2.07578	0	3.10389	15.1652	43.8571	65.5031	25.1936	27.8297	3.38816	0.611941	-5.53674	3.08149e-08	2.18056e-06
ENSG00000108242	CYP2C18	1.49857	0	2.71122	1.29467	12.4277	25.4146	4.79773	4.32742	3.38807	1.13885	-2.97498	0.0029301	0.0181113
ENSG00000260564	AL161912.2	2.95342	5.49041	16.1207	1.90233	35.2702	148.884	26.4118	137.652	3.38628	0.652969	-5.18597	2.14891e-07	1.04671e-05
ENSG00000149735	GPHA2	3.01246	2.11984	5.05624	3.25347	33.1511	48.8947	21.2503	21.4639	3.38593	0.555022	-6.10055	1.05707e-09	1.26329e-07
ENSG00000273777	CEACAM20	0	2.37823	4.10322	5.64278	38.7901	40.9985	13.968	15.0806	3.38495	0.739889	-4.57494	4.76361e-06	0.000129385
ENSG00000206552	KRBOX1-AS1	1.15436	0	2.08286	1.02086	8.65972	19.4478	6.45285	31.1055	3.37988	0.899786	-3.75631	0.000172435	0.00218607
ENSG00000175202	HIGD2B	0	0	2.19109	1.02994	8.54282	9.24657	8.42664	17.5935	3.37697	0.975224	-3.46276	0.000534661	0.00512166
ENSG00000125631	HTR5BP	0	0	0	0	3.42836	1.91751	0.949512	5.95454	3.37678	1.288	-2.62173	0.00874849	0.0402545
ENSG00000273983	H3C8	12.0938	7.01084	67.1308	54.5533	301.059	610.082	188.125	183.762	3.37188	0.583378	-5.77992	7.47368e-09	6.60065e-07
ENSG00000256870	SLC5A8	0	0	1.95639	0.989927	19.0653	1.17698	4.42829	9.3373	3.37155	1.17979	-2.85776	0.00426645	0.0238868
ENSG00000265828	MIR3939	1.24325	0	2.42557	0	12.7757	10.7808	4.18916	4.65237	3.36986	1.11617	-3.01914	0.00253497	0.0162533
ENSG00000233101	HOXB-AS3	13.0789	0	8.43524	1.31401	48.8172	82.5629	33.6455	26.4222	3.36969	0.805588	-4.18289	2.87825e-05	0.000556404
ENSG00000189030	VHLL	0	1.31533	1.12292	0	6.23044	7.86535	3.79444	3.94203	3.36748	1.18093	-2.85155	0.00435067	0.0242159
ENSG00000198033	TUBA3C	34.0894	18.9356	357.996	199.234	1455.27	2291.34	978.804	1789.55	3.36619	0.654976	-5.13941	2.75604e-07	1.28781e-05
ENSG00000163440	PDCL2	1.0657	1.18575	9.73201	2.97062	51.4049	46.2018	20.6463	85.0851	3.3637	0.802736	-4.19029	2.786e-05	0.000543803
ENSG00000284070	AP000356.2	7.36049	6.34585	51.3766	5.16115	135.926	377.286	30.8714	1420.58	3.36368	0.886977	-3.7923	0.000149258	0.00196735
ENSG00000250655	AC096661.1	0	0	1.0116	3.02687	18.0486	7.93236	7.31603	5.12171	3.36312	1.05322	-3.19318	0.00140713	0.0105333
ENSG00000223446	AL451065.1	0	0	6.67346	2.06585	23.0472	36.8811	9.36038	24.7731	3.36303	0.720065	-4.67046	3.00523e-06	8.98718e-05
ENSG00000189401	OTUD6A	50.0099	74.7984	159.768	66.6699	1015.11	1075.26	624.773	290.291	3.36231	0.316843	-10.6119	2.62289e-26	4.21604e-22
ENSG00000226846	LINC00348	1.08243	0	5.19813	1.60589	16.6587	39.6834	8.56465	21.7683	3.35948	0.844753	-3.97688	6.9826e-05	0.00110416
ENSG00000230399	RBBP8P1	1.09901	0	29.714	16.2891	139.18	144.276	83.3933	40.3411	3.35894	0.805427	-4.17038	3.04088e-05	0.000580857
ENSG00000226268	AC135977.1	0	0	1.04316	0	4.31292	5.4726	0.914162	71.5112	3.35673	1.18022	-2.84415	0.004453	0.0246437
ENSG00000270623	SPCS2P2	0	0	1.07605	2.01703	4.94902	15.7228	4.58017	4.49882	3.35658	1.20421	-2.78737	0.00531377	0.0281429
ENSG00000127564	PKMYT1	8.8794	16.411	174.23	53.8562	695.373	762.444	480.909	489.585	3.35306	0.623821	-5.37503	7.65681e-08	4.5753e-06
ENSG00000213222	TOMM40P4	0	0	2.19955	0	4.38289	11.1924	1.8472	3.81865	3.35242	1.31331	-2.55265	0.0106908	0.0465261
ENSG00000205106	LINC02716	0	0	3.49821	1.06196	10.1919	17.2604	7.8066	5.84514	3.35189	0.967166	-3.46569	0.000528882	0.00508144
ENSG00000230033	AC006357.1	1.16065	0	3.2409	0	25.4934	3.97598	4.61988	4.41586	3.35098	1.21274	-2.76316	0.00572452	0.0296443
ENSG00000091704	CPA1	0	2.86318	0.947171	1.15633	15.1243	16.532	4.58605	9.7328	3.35056	0.921158	-3.63733	0.000275474	0.0031161
ENSG00000237478	AL390023.1	0	0	2.38169	1.02783	11.6322	12.9196	1.85413	7.06135	3.3505	1.087	-3.08233	0.0020539	0.0138891
ENSG00000268009	SSX4	0	0	16.0976	2.2896	60.7506	59.9066	23.7412	20.0574	3.34527	0.923936	-3.62068	0.000293834	0.00327371
ENSG00000170748	RBMXL2	4.98495	1.25782	67.1514	39.704	238.446	424.688	203.838	360.298	3.3448	0.692227	-4.83194	1.35209e-06	4.72474e-05
ENSG00000274583	FAM74A4	1.12821	0	0	0	3.20873	3.28351	3.65722	3.87962	3.34136	1.30462	-2.56118	0.0104318	0.0457206
ENSG00000259397	AC021231.2	1.2417	0	0	1.03128	3.54324	10.9227	2.81993	5.26787	3.33739	1.20984	-2.75854	0.00580603	0.0299314
ENSG00000179766	ATP8B5P	4.19332	6.52848	43.2415	24.5932	158.166	326.799	119.063	227.112	3.33683	0.552269	-6.04203	1.52191e-09	1.69883e-07
ENSG00000143006	DMRTB1	14.085	7.26249	119.507	50.7371	446.031	648.434	361.895	418.265	3.33617	0.666614	-5.00465	5.59628e-07	2.28892e-05
ENSG00000214012	KRT18P38	0	0	1.1133	3.08203	9.73529	21.5434	1.89457	4.87583	3.33369	1.22074	-2.73088	0.00631661	0.0318334
ENSG00000229869	AL359878.2	0	0	2.27986	3.13862	13.3026	16.142	13.3502	10.5705	3.33028	0.766008	-4.34757	1.37651e-05	0.000312515
ENSG00000006047	YBX2	54.3653	24.9181	334.332	88.6338	1104.77	1854.61	827.543	2827.6	3.32877	0.599426	-5.55327	2.80379e-08	2.00749e-06
ENSG00000274274	GAGE13	6.1383	11.8906	37.4135	139.341	617.479	584.301	270.898	162.359	3.3286	0.88242	-3.77212	0.000161863	0.00208644
ENSG00000196475	GK2	3.30679	0	9.99034	3.96282	46.3449	71.8962	16.1082	348.03	3.32653	0.640532	-5.19339	2.06498e-07	1.01974e-05
ENSG00000264029	AC061975.3	0	1.39369	1.15716	2.98734	13.1487	20.722	9.81614	26.1075	3.32649	0.769634	-4.32217	1.54505e-05	0.000342789
ENSG00000169402	RSPH10B2	2.67769	4.12479	6.07421	17.5613	73.3232	72.5555	49.2868	168.146	3.32621	0.497356	-6.68777	2.26594e-11	4.88896e-09
ENSG00000174448	STARD6	0.485935	0	4.84265	3.65267	14.9311	27.0953	12.9417	46.2459	3.32604	0.629973	-5.27966	1.29427e-07	6.98123e-06
ENSG00000231976	FAM238B	2.09126	2.1476	33.7146	1.74905	65.741	184.96	48.0616	272.131	3.32389	0.958674	-3.46717	0.000525972	0.0050615
ENSG00000260958	AC023824.3	0.911402	0	2.03644	1.56764	7.17677	14.5096	14.0746	10.1486	3.32194	0.813229	-4.08487	4.41019e-05	0.000771883
ENSG00000279256	AL442639.1	0	0	1.01112	0	0	11.0142	0	70.2291	3.31885	1.24373	-2.66845	0.00762013	0.036465
ENSG00000103832	GOLGA8UP	1.20546	0	1.09264	1.02922	4.68091	18.9202	1.88449	55.2933	3.31883	1.07514	-3.08689	0.00202261	0.0137237
ENSG00000145920	CPLX2	0.799548	0.828017	7.80814	4.00977	55.4151	27.6425	19.5979	30.9807	3.31767	0.748538	-4.4322	9.32769e-06	0.000227689
ENSG00000146839	ZAN	0	1.30869	14.0885	7.42755	66.9937	54.4883	53.4979	66.2696	3.31613	0.627786	-5.28226	1.27603e-07	6.92245e-06
ENSG00000271736	LINC02772	1.01406	0	0	1.79443	5.40401	12.7992	2.39495	5.56382	3.31555	1.07411	-3.08679	0.00202332	0.0137256
ENSG00000263110	AC007861.2	0	0	0	1.03216	5.21817	2.84746	1.91015	6.26546	3.31159	1.20045	-2.75864	0.00580426	0.0299271
ENSG00000130643	CALY	3.48785	8.68199	6.17206	2.06665	55.5076	52.4874	27.9035	27.6667	3.31123	0.646103	-5.12492	2.97665e-07	1.37045e-05
ENSG00000283269	AC005524.1	2.2272	0	34.8052	11.7766	182.663	104.645	71.4567	53.3811	3.31087	0.851107	-3.89007	0.000100214	0.00146174
ENSG00000186714	CCDC73	8.732	7.56976	85.8977	62.372	415.07	600.586	210.628	181.251	3.30842	0.690016	-4.7947	1.62919e-06	5.5016e-05
ENSG00000251221	LINC01337	0	0	2.16573	1.00978	8.02982	11.3523	5.51262	8.23507	3.3082	0.982747	-3.36628	0.000761892	0.0066885
ENSG00000093009	CDC45	18.9612	6.95654	81.8206	47.8357	532.796	390.89	250.329	231.727	3.30773	0.562776	-5.87752	4.16453e-09	4.03257e-07
ENSG00000234424	AL353743.4	0	0	1.00879	2.02446	15.3284	7.91761	0.9155	4.87917	3.30594	1.23171	-2.68403	0.00727404	0.0352124
ENSG00000239831	RNF7P1	0	0	1.1911	1.02161	5.26989	8.95663	2.81338	5.76918	3.30277	1.18015	-2.79861	0.00513237	0.0274033
ENSG00000231046	AL360227.1	0	0	0	0	1.03247	4.22868	0.920852	7.83423	3.30171	1.29117	-2.55716	0.0105531	0.0461582
ENSG00000042813	ZPBP	4.8193	15.3372	53.4569	20.6087	160.391	441.337	105.698	340.668	3.30147	0.561525	-5.87947	4.11589e-09	3.99751e-07
ENSG00000242441	GTF2A1L	8.40564	0	11.6055	0	25.3142	53.5294	36.8008	172.579	3.30009	0.664634	-4.96527	6.86042e-07	2.6929e-05
ENSG00000284209	FP325313.1	0	0	3.10512	0	5.24154	11.9276	7.24636	23.1083	3.30001	1.01718	-3.24428	0.00117747	0.00918686
ENSG00000227117	HORMAD2-AS1	0	0	5.36061	2.06296	24.1546	21.6102	11.1836	13.0982	3.29838	0.730996	-4.51217	6.41684e-06	0.000167171
ENSG00000158402	CDC25C	2.62145	5.14769	40.0301	19.3866	239.745	169.036	86.5906	150.018	3.29588	0.695248	-4.74058	2.13104e-06	6.88528e-05
ENSG00000177483	RBM44	41.8897	24.7965	182.421	80.2776	713.383	1194.16	522.212	530.574	3.29452	0.520841	-6.32538	2.52605e-10	3.96134e-08
ENSG00000230361	VN1R32P	0	0	1.04471	3.00075	7.43754	21.2473	3.62014	18.6417	3.2929	0.960751	-3.42742	0.000609343	0.00564366
ENSG00000171495	MROH2B	2.21817	1.28667	4.93957	0	12.9784	34.6096	14.3256	411.58	3.29149	0.67022	-4.91105	9.05903e-07	3.39034e-05
ENSG00000225623	AGBL4-IT1	0	1.28019	2.09725	1.00497	9.23827	14.2123	9.14005	9.21417	3.28325	0.892224	-3.67985	0.000233373	0.00273613
ENSG00000286911	AC009533.3	4.71303	5.02729	23.6303	7.12013	59.1559	190.569	48.2248	100.988	3.27946	0.576719	-5.6864	1.29747e-08	1.06406e-06
ENSG00000223963	THAP12P8	0	0	2.99329	3.0045	11.906	22.2953	12.6604	8.22475	3.27803	0.803636	-4.079	4.52305e-05	0.000787261
ENSG00000185888	PRSS38	0	0	13.2507	0	40.0576	40.1829	16.7318	15.9465	3.27576	1.01251	-3.23529	0.00121518	0.00940477
ENSG00000249244	AC110373.1	0	0	4.90613	1.99994	14.4574	26.6955	12.5801	20.4387	3.27559	0.843955	-3.88123	0.000103928	0.00149824
ENSG00000104755	ADAM2	0	0	8.64159	6.78137	24.336	82.1634	6.14255	285.829	3.27413	1.03456	-3.16476	0.00155212	0.011307
ENSG00000246203	AL353807.3	4.81297	5.05087	6.53146	4.11486	35.6336	94.3807	18.8135	37.6933	3.27174	0.568015	-5.75995	8.41388e-09	7.35025e-07
ENSG00000254192	AC011365.1	1.20515	2.51357	1.08887	2.02021	14.5535	21.8172	12.9112	7.8985	3.27012	0.790074	-4.139	3.48816e-05	0.000645209
ENSG00000235166	LINC01440	0	0	1.08116	0	2.87668	4.42708	2.45832	11.9053	3.26598	1.29073	-2.53033	0.0113955	0.0487798
ENSG00000269186	LINC01082	0	0	0.515655	1.06689	4.12934	5.82722	1.93819	17.3138	3.2634	1.13479	-2.87578	0.0040303	0.0229158
ENSG00000223947	AC016738.1	1.18049	1.23081	13.7391	6.10027	49.2126	85.2516	30.3333	34.2855	3.26317	0.590417	-5.52689	3.25952e-08	2.28792e-06
ENSG00000094804	CDC6	25.6546	66.5526	147.106	50.9723	841.323	752.022	483.542	289.471	3.26287	0.427747	-7.62804	2.38351e-14	1.59417e-11
ENSG00000258137	AC079313.2	0	1.14149	2.32391	0	8.18787	11.41	4.72452	4.22155	3.26069	1.07305	-3.03871	0.00237596	0.0155501
ENSG00000229750	AC096649.1	0	0	0	1.09384	4.15138	3.5442	2.02624	7.04753	3.25682	1.21575	-2.67885	0.00738753	0.0356224
ENSG00000259909	AC100827.1	0	2.72444	9.12318	5.13584	46.558	51.0402	25.9688	16.6711	3.25671	0.679202	-4.79491	1.62746e-06	5.5016e-05
ENSG00000255298	OR8G5	0	0	2.6849	2.66421	11.2497	18.93	12.7738	14.155	3.25648	0.805017	-4.04523	5.22707e-05	0.000880712
ENSG00000262681	AC005722.3	1.20301	3.77048	0	2.04525	16.2377	17.6237	14.8547	6.29005	3.25554	0.766068	-4.24967	2.14088e-05	0.000441187
ENSG00000224653	AC023141.3	0	1.43608	0	0	3.52809	4.57603	1.91231	4.70045	3.25293	1.28328	-2.53485	0.0112495	0.0483166
ENSG00000274966	AC019322.3	0	0	3.59465	8.3916	30.5874	35.7894	22.4587	27.7003	3.24965	0.666026	-4.87916	1.06537e-06	3.89199e-05
ENSG00000183346	CABCOCO1	0	0.988592	2.42399	1.67742	4.55331	27.421	6.76485	46.6261	3.24963	0.943976	-3.44249	0.000576377	0.00541478
ENSG00000081248	CACNA1S	1.22295	0	1.09739	0	9.21254	5.12781	1.87446	4.32586	3.24897	1.20868	-2.68802	0.00718772	0.0348669
ENSG00000237054	PRMT5-AS1	0.872311	1.83365	5.49815	6.03562	32.4688	50.3549	20.867	70.961	3.24582	0.593002	-5.47354	4.41141e-08	2.88835e-06
ENSG00000236206	AL356441.1	0	4.40571	2.99144	2.93266	20.7243	35.7678	18.7687	12.8992	3.24532	0.628018	-5.16756	2.37173e-07	1.14484e-05
ENSG00000287675	AC078916.1	0	0	0	0	1.94685	1.0351	2.7517	6.13831	3.24092	1.27653	-2.53884	0.011122	0.0479161
ENSG00000280002	AC078925.4	2.35301	1.23972	9.59483	11.1266	72.332	76.2781	28.4836	28.252	3.23805	0.572124	-5.6597	1.5164e-08	1.20072e-06
ENSG00000154611	PSMA8	6.86236	3.69134	29.4609	20.8562	116.385	215.061	113.209	134.572	3.23682	0.459737	-7.04059	1.91434e-12	6.21637e-10
ENSG00000145700	ANKRD31	38.6345	47.4796	162.882	85.8342	645.61	1263.42	464.298	439.095	3.23653	0.434239	-7.45334	9.10047e-14	4.64384e-11
ENSG00000279388	AC073578.3	1.17071	0	5.25879	9.12037	37.9246	46.9795	29.276	22.0817	3.23057	0.622885	-5.18646	2.14326e-07	1.04554e-05
ENSG00000188175	HEPACAM2	0	0	4.15407	2.04439	7.94969	20.832	17.3607	19.2053	3.22631	0.719046	-4.48693	7.22562e-06	0.000184799
ENSG00000226121	AHCTF1P1	3.26376	12.9869	4.90378	0	21.0908	114.851	10.6516	129.543	3.22628	0.797784	-4.04405	5.25363e-05	0.000884723
ENSG00000132749	TESMIN	39.2673	29.608	74.983	45.4453	358.197	766.74	245.45	529.374	3.22404	0.39879	-8.08454	6.23998e-16	6.47106e-13
ENSG00000272360	AC116036.2	1.22573	0	1.1269	2.0457	10.912	11.8429	9.25062	13.0435	3.22382	0.821765	-3.92304	8.74386e-05	0.00131639
ENSG00000286941	AC244250.4	1.20892	0	11.9265	2.05046	30.5557	72.0976	5.54951	231.804	3.2219	0.860875	-3.74259	0.00018213	0.00227384
ENSG00000171811	CFAP46	58.797	12.8849	140.28	148.727	909.963	1115.86	498.493	926.944	3.22135	0.535619	-6.01426	1.80708e-09	1.92365e-07
ENSG00000164900	GBX1	0	2.33115	24.0873	1.41047	68.8633	86.1322	41.9448	65.0924	3.21745	0.810126	-3.97155	7.14079e-05	0.00112442
ENSG00000174898	CATSPERD	1.85549	1.16398	5.9902	2.8839	15.4015	60.1374	12.1329	105.046	3.21697	0.678761	-4.73947	2.1428e-06	6.89557e-05
ENSG00000139351	SYCP3	46.9594	63.2332	301.88	109.765	1190.53	1620.74	807.998	761.833	3.21645	0.495078	-6.49685	8.20173e-11	1.48966e-08
ENSG00000068985	PAGE1	4.79547	5.11876	38.459	33.6138	237.857	199.374	139.216	63.3423	3.21348	0.57118	-5.62603	1.84399e-08	1.4182e-06
ENSG00000188162	OTOG	14.9822	8.50015	37.3729	20.0264	213.958	287.367	73.8672	135.124	3.21298	0.46387	-6.92647	4.31481e-12	1.21491e-09
ENSG00000170925	TEX13B	0	1.27738	7.67354	5.09583	43.4645	41.3347	14.8914	9.13701	3.21218	0.836088	-3.84192	0.000122075	0.00169013
ENSG00000233122	CTAGE7P	1.11802	0	2.01779	4.04872	19.9335	19.4332	12.8263	20.8756	3.21217	0.789772	-4.06722	4.75782e-05	0.000818949
ENSG00000231512	SEPTIN14P21	4.71666	2.69076	9.2613	8.68047	46.2737	78.3431	44.0094	25.1867	3.212	0.554702	-5.79049	7.01818e-09	6.31953e-07
ENSG00000158077	NLRP14	2.21883	0	7.0154	15.957	58.3502	85.0076	36.9089	36.298	3.20914	0.605426	-5.30063	1.15404e-07	6.35278e-06
ENSG00000262492	AC104581.1	0	2.6003	1.08608	0	7.36636	12.0134	4.609	8.03328	3.20748	1.04616	-3.06594	0.00216989	0.0144906
ENSG00000134612	FOLH1B	0	2.54843	0	0	4.86762	4.69416	6.00679	5.16551	3.20585	1.27152	-2.52129	0.0116927	0.0497152
ENSG00000287540	AC116350.1	0	0	2.09792	5.08456	14.7599	22.1597	14.8158	5.30378	3.20523	1.02893	-3.11511	0.00183879	0.0127565
ENSG00000255104	AC005324.3	0	1.77079	8.23182	4.36298	0	82.8772	7.92206	21.7155	3.20248	1.14754	-2.79074	0.00525882	0.027918
ENSG00000270036	AC027243.2	0	1.23896	2.05624	0	12.0097	5.55572	5.43221	3.93818	3.20194	1.08682	-2.94617	0.0032174	0.0193804
ENSG00000214558	AL365217.1	3.52303	0	7.382	2.04678	36.0324	41.6062	12.9103	53.1013	3.19625	0.823089	-3.88324	0.000103075	0.00148728
ENSG00000234884	AL022329.1	2.06661	0	7.41386	5.3939	27.3898	59.0361	16.5019	61.7214	3.19415	0.610819	-5.2293	1.70152e-07	8.7521e-06
ENSG00000110148	CCKBR	0	1.19036	2.87004	0.8162	7.15198	9.90138	9.31325	5.33396	3.19196	1.07436	-2.97103	0.00296803	0.0183035
ENSG00000222046	DCDC2B	0	1.15474	2.97323	2.63241	21.9617	15.7721	9.35245	11.782	3.18858	0.743972	-4.28589	1.82012e-05	0.000390903
ENSG00000218014	KRT19P1	0	0	1.11975	0	1.72825	3.99281	3.79216	44.3053	3.18729	1.17119	-2.72142	0.00650029	0.0324843
ENSG00000253506	NACA2	1.16947	0	3.18381	3.02497	12.0789	27.8031	12.9001	78.4192	3.18717	0.701729	-4.54188	5.57537e-06	0.000148007
ENSG00000251038	AC090958.1	0	0	2.43145	0	7.8292	6.91605	0.961312	5.13781	3.18696	1.25596	-2.53746	0.011166	0.0480535
ENSG00000121634	GJA8	0	0	0	1.03689	2.61765	5.73016	0.946665	28.4671	3.18624	1.20523	-2.64369	0.00820079	0.0384587
ENSG00000287738	AL359764.3	1.10645	0	2.00325	2.01543	10.7746	22.3009	3.61978	5.2845	3.18592	0.95515	-3.33552	0.000851401	0.00725247
ENSG00000182759	MAFA	8.59583	0	53.6049	26.5978	251.394	204	152.424	78.133	3.18483	0.733725	-4.34064	1.42071e-05	0.000320287
ENSG00000181323	SPEM1	1.27086	0	0	1.03634	8.74401	3.79968	2.85029	84.9786	3.18157	1.254	-2.53714	0.0111762	0.0480838
ENSG00000254372	AC040914.1	0	0	1.17873	0	4.56598	2.02633	2.75272	9.2914	3.1747	1.20201	-2.64115	0.0082625	0.0386305
ENSG00000196388	INCA1	41.695	18.7597	95.7599	39.7484	529.199	541.635	257.883	231.891	3.17199	0.424475	-7.47275	7.85357e-14	4.27926e-11
ENSG00000279072	AC118758.2	141.163	301.358	1886.21	1381.46	9391.79	11542.6	4116.78	5794.17	3.17039	0.788288	-4.02186	5.77399e-05	0.000952886
ENSG00000259803	SLC22A31	2.7699	2.523	10.6713	8.05809	66.533	43.4015	48.0724	38.1882	3.16916	0.428635	-7.39361	1.42898e-13	6.95717e-11
ENSG00000203909	DPPA5	0	0	3.27303	0	10.9328	8.86461	2.75823	3.65303	3.16898	1.19992	-2.64099	0.0082663	0.0386369
ENSG00000230626	AC011005.1	1.25954	0	3.33692	1.02155	15.4838	16.3976	6.58749	16.7578	3.16759	0.824838	-3.84026	0.000122906	0.00169871
ENSG00000265766	CXADRP3	1.09435	0	32.5632	16.0473	58.7774	253.259	24.2016	154.375	3.16475	1.2232	-2.58727	0.00967406	0.0433029
ENSG00000230729	AL160270.1	1.27688	0	2.28678	0	5.17556	15.5489	2.86183	8.5759	3.16301	1.06646	-2.96589	0.00301806	0.0185092
ENSG00000261614	YBX3P1	0	0	6.61989	1.04496	10.9868	38.7686	2.82476	61.1247	3.16284	0.942537	-3.35567	0.000791744	0.00687361
ENSG00000227105	PARP1P1	0	0	4.32595	0	3.8028	18.4771	7.45061	4.0521	3.16133	1.21742	-2.59675	0.00941117	0.0424215
ENSG00000232765	AL158819.1	0	0	14.746	9.27252	58.2768	58.4081	46.3446	20.1984	3.16023	0.792225	-3.98905	6.63376e-05	0.00106525
ENSG00000205642	VCX3B	8.54355	27.4612	122.857	96.057	383.834	680.918	661.965	195.979	3.15939	0.615503	-5.13303	2.85113e-07	1.31693e-05
ENSG00000157856	DRC1	1.72858	11.3471	16.595	5.57162	53.444	127.737	42.9422	195.598	3.15923	0.584149	-5.40826	6.3641e-08	3.92693e-06
ENSG00000260721	AF067845.1	0	0	3.22854	1.02022	6.94393	15.3798	7.43199	33.766	3.15732	0.931787	-3.38845	0.000702881	0.00629597
ENSG00000276903	H2AC16	9.23222	6.67853	36.018	19.9222	123.555	227.672	134.734	104.066	3.15538	0.478457	-6.59491	4.25516e-11	8.29059e-09
ENSG00000109805	NCAPG	8.68017	18.8335	139.403	40.3003	313.083	855.119	203.471	248.276	3.15271	0.694851	-4.53725	5.69934e-06	0.0001508
ENSG00000147689	FAM83A	4.99227	4.28849	5.93154	0.706275	50.3044	41.9258	13.7736	13.7875	3.15032	0.685838	-4.59339	4.36104e-06	0.000120239
ENSG00000148513	ANKRD30A	3.58451	4.84881	252.08	31.5985	446.631	1238.76	247.435	752.631	3.14988	1.06449	-2.95905	0.00308587	0.018803
ENSG00000234267	TULP3P1	3.59141	0	1.0844	1.58994	5.44067	21.9197	10.0555	18.7086	3.14871	0.893116	-3.52553	0.000422633	0.00429962
ENSG00000265273	PGDP1	1.18613	1.2522	3.21478	1.01426	26.9646	8.34326	9.22233	5.90528	3.14546	0.917621	-3.42784	0.000608402	0.00563657
ENSG00000105605	CACNG7	0.727604	0	11.24	1.1895	21.2785	34.8223	20.4276	7.52655	3.14418	1.03808	-3.02885	0.00245483	0.0159109
ENSG00000214147	AC092952.1	1.19669	0	2.15349	1.01724	9.59408	17.1812	2.81157	3.55829	3.144	1.10808	-2.83733	0.0045493	0.0250151
ENSG00000267778	AC004221.1	0	2.61109	5.58262	1.01464	19.4783	21.5279	19.6766	10.6	3.14274	0.677948	-4.63566	3.55797e-06	0.000102441
ENSG00000197651	CCER1	0	0.836721	11.3323	4.72916	12.5911	88.1889	13.7699	228.409	3.1388	1.0666	-2.94281	0.0032525	0.0195698
ENSG00000226567	LINC00606	0	0	1.55063	0	7.39198	6.26461	0	12.1459	3.13847	1.22762	-2.55655	0.0105717	0.0461954
ENSG00000236834	LINC00421	0	0	5.52239	0	12.8342	19.6085	4.69477	13.098	3.13775	0.909191	-3.45114	0.000558217	0.00528587
ENSG00000227201	CNN2P1	3.7253	0	3.3643	5.16594	23.4416	40.2332	18.8855	14.8353	3.13326	0.612734	-5.11357	3.1613e-07	1.43748e-05
ENSG00000234296	AL390961.1	0	1.3509	13.7769	0	31.0624	57.1431	11.3458	100.495	3.13272	0.893038	-3.50794	0.000451594	0.00452692
ENSG00000179178	TMEM125	2.55535	0	3.0141	0.698678	14.7228	7.48479	22.6589	11.8828	3.12837	0.927823	-3.37174	0.000746961	0.0065844
ENSG00000177398	UMODL1	7.30313	0	3.79564	3.32865	50.7546	26.3259	10.3111	54.6419	3.12774	0.765316	-4.08686	4.37256e-05	0.000766879
ENSG00000253301	LINC01606	64.2094	35.4083	591.238	194.4	2093.29	2446.37	1256.43	2620.54	3.12443	0.668094	-4.67663	2.91628e-06	8.76191e-05
ENSG00000065371	ROPN1	1.18773	0	9.15588	0.9066	13.3958	56.1206	5.40531	451.773	3.12332	1.16647	-2.6776	0.00741524	0.0356757
ENSG00000237970	TMEM161BP1	1.06366	0	1.9298	0	1.31491	17.8262	1.77285	12.7711	3.1201	1.15895	-2.69218	0.00709873	0.0345511
ENSG00000176746	MAGEB6	3.49319	0	36.787	36.4658	190.322	195.069	118.632	55.3832	3.11987	0.792259	-3.93794	8.21833e-05	0.00125037
ENSG00000175718	RBMXL3	7.97051	5.23876	64.7382	53.2088	354.911	285.044	218.751	104.683	3.11478	0.619971	-5.02408	5.05865e-07	2.1159e-05
ENSG00000276088	RN7SL620P	0	0	0	3.11751	4.60972	15.1289	1.84424	6.24638	3.11472	1.13044	-2.75532	0.0058634	0.0301569
ENSG00000152430	BOLL	31.4982	17.1588	81.2567	29.2329	278.918	540.524	230.156	440.681	3.10768	0.443808	-7.00231	2.51778e-12	7.8584e-10
ENSG00000177112	IRAG1-AS1	2.50865	5.63319	12.0014	1.09798	1.83172	112.729	24.1325	128.133	3.10532	0.920102	-3.37497	0.00073823	0.00652354
ENSG00000280268	AC025125.1	0	2.27074	12.8989	0.97573	19.7972	61.6418	26.9785	31.2137	3.10378	0.755543	-4.10801	3.99077e-05	0.000717904
ENSG00000261800	AC023824.5	0	1.73089	5.27906	0.973354	25.3086	15.0256	12.1281	23.1135	3.1026	0.819584	-3.78558	0.00015335	0.00200811
ENSG00000229356	LRRC3-DT	0	0	2.19191	1.02192	11.8483	3.991	5.58486	4.39071	3.1015	1.06249	-2.91909	0.00351055	0.0206434
ENSG00000226070	AL139275.1	2.35521	2.50892	0	0	10.5334	9.29094	9.24851	8.1392	3.09988	0.87843	-3.52889	0.000417312	0.00426282
ENSG00000176160	HSF5	9.02429	13.0915	81.8544	35.567	217.182	546.06	137.582	883.452	3.09771	0.577448	-5.36449	8.11797e-08	4.76234e-06
ENSG00000225093	RPL3P7	0	1.27462	3.31253	1.03489	14.6766	19.0418	2.81837	8.55658	3.09728	0.903748	-3.42715	0.000609947	0.00564763
ENSG00000255262	ELOBP2	1.3338	0	2.35529	6.11127	20.6819	28.0961	17.8986	19.9767	3.09469	0.634781	-4.8752	1.08698e-06	3.94659e-05
ENSG00000100170	SLC5A1	6.46757	19.8194	43.3928	4.97117	172.941	186.503	110.203	88.1494	3.08744	0.688642	-4.48338	7.34706e-06	0.000187352
ENSG00000237289	CKMT1B	0	0	2.88805	2.30035	16.7944	11.3445	13.1576	7.51632	3.08705	0.902939	-3.41889	0.000628776	0.00578094
ENSG00000261192	RNF126P1	0	1.84108	3.24847	0	3.82177	20.7652	7.23348	36.4766	3.08556	0.918475	-3.35944	0.000781003	0.00680241
ENSG00000157965	SSX8P	0	0	19.7589	1.46744	59.3975	50.7685	25.541	13.7505	3.08535	1.03727	-2.97451	0.00293461	0.0181322
ENSG00000140478	GOLGA6D	15.2869	0	30.8234	4.10384	92.2094	154.92	73.6076	259.094	3.08346	0.739642	-4.16886	3.06132e-05	0.000583721
ENSG00000130943	PKDREJ	7.94483	7.20288	15.3588	2.03422	74.5823	84.4784	48.7882	140.633	3.08333	0.451356	-6.83125	8.4177e-12	2.06574e-09
ENSG00000267605	AC016590.1	48.7326	43.1049	134.815	119.631	781.035	785.018	629.145	727.868	3.08185	0.413207	-7.45838	8.75954e-14	4.61642e-11
ENSG00000128040	SPINK2	3.24022	1.25517	48.4313	28.4702	123.212	323.477	80.5066	434.742	3.07944	0.707582	-4.35205	1.34868e-05	0.000307717
ENSG00000257129	AC126177.1	0	1.11167	0.95985	2.06732	3.28602	14.4243	5.80228	9.60296	3.0764	1.17244	-2.62394	0.00869188	0.0400727
ENSG00000214946	TBC1D26	1.75503	5.88182	12.1194	4.99372	43.8623	70.1243	35.3708	103.854	3.0763	0.685132	-4.49009	7.11934e-06	0.000182952
ENSG00000271065	AC107031.1	0	0	2.24817	0	4.63571	3.17991	6.40272	12.0355	3.07519	1.18037	-2.60528	0.00917999	0.0416539
ENSG00000121446	RGSL1	0.962906	1.87142	9.07715	1.82007	16.5849	43.4257	23.849	180.182	3.07463	0.872891	-3.52236	0.00042773	0.00433909
ENSG00000150783	TEX12	7.52445	12.0391	25.7801	16.8997	133.602	163.901	97.1243	72.5346	3.07015	0.391072	-7.85061	4.14004e-15	3.59713e-12
ENSG00000126803	HSPA2	249.92	172.038	513.222	143.82	2040.41	3147.75	1601.47	2193.24	3.06992	0.358665	-8.5593	1.13553e-17	2.43367e-14
ENSG00000197748	CFAP43	29.7116	35.657	111.85	61.7234	288.758	1025.41	191.487	721.836	3.06666	0.531148	-5.77364	7.75776e-09	6.83278e-07
ENSG00000134690	CDCA8	25.7738	18.5541	90.3841	52.3207	393.584	568.272	217.514	276.181	3.0659	0.506949	-6.04775	1.46882e-09	1.65103e-07
ENSG00000112984	KIF20A	6.39015	17.1187	50.6405	53.4589	260.976	393.277	177	210.677	3.06578	0.521018	-5.88421	3.9995e-09	3.89624e-07
ENSG00000277858	H2AB2	3.94655	2.65658	0	5.11522	13.6707	47.9434	11.4358	18.769	3.06448	0.739839	-4.1421	3.44146e-05	0.000639145
ENSG00000165584	SSX3	9.72887	3.416	60.4233	34.2702	297.436	209.843	170.348	95.819	3.06057	0.634974	-4.82	1.4356e-06	4.9413e-05
ENSG00000273331	TM4SF19-TCTEX1D2	0	0	2.15297	2.01367	8.51227	14.4602	4.59509	4.02793	3.05866	1.03429	-2.95725	0.00310393	0.0188915
ENSG00000235687	LINC00993	1.5497	0	18.0221	3.52023	38.5295	90.9873	22.7724	72.288	3.05773	0.713146	-4.28766	1.80564e-05	0.000388799
ENSG00000168148	H3-4	11.7119	6.57008	477.71	18.6083	1228.38	1263.82	720.182	2167.59	3.05664	1.19804	-2.55136	0.0107304	0.046629
ENSG00000230159	BX119904.1	0	1.25135	5.14935	1.00837	13.5283	26.9706	7.17819	10.52	3.05564	0.904836	-3.37701	0.000732782	0.0064947
ENSG00000228705	LINC00659	1.6834	1.98524	1.73452	0	7.49476	11.6319	9.33638	11.0998	3.05476	0.9241	-3.30566	0.00094754	0.00785416
ENSG00000072571	HMMR	29.3249	13.8412	80.9811	28.5446	301.627	510.817	145.722	309.89	3.05205	0.502452	-6.07431	1.24521e-09	1.43997e-07
ENSG00000077080	ACTL6B	0	0	4.68114	0.843406	10.5145	17.0989	6.51258	6.71678	3.05194	0.889711	-3.43026	0.000603011	0.00560187
ENSG00000286755	AC135893.1	7.10103	1.2681	2.14293	0	15.3547	41.5235	7.44789	17.0663	3.05146	0.804871	-3.79123	0.000149901	0.00197501
ENSG00000124818	OPN5	0.815847	0.882628	3.68966	2.24124	15.5898	26.087	8.93839	140.639	3.0513	0.628098	-4.85801	1.18573e-06	4.22135e-05
ENSG00000261741	FRG2KP	0	0	3.11116	1.96604	11.9419	15.8618	6.24807	41.0375	3.05063	0.767508	-3.97473	7.04602e-05	0.00111201
ENSG00000105011	ASF1B	28.1901	8.95862	121.752	41.8973	375.163	563.451	313.343	269.487	3.04959	0.534513	-5.70535	1.16103e-08	9.71998e-07
ENSG00000244515	KRT18P34	0	0	2.20701	0	4.40756	4.88698	4.70124	4.74954	3.0473	1.19453	-2.55105	0.01074	0.0466579
ENSG00000287577	AC009533.4	5.89266	7.52281	12.8182	12.2279	54.2521	141.029	46.1969	80.7338	3.0458	0.435953	-6.98655	2.81729e-12	8.70868e-10
ENSG00000182645	CCDC172	7.53699	2.57579	42.7308	24.9321	85.7059	325.774	77.3964	96.1944	3.04506	0.688588	-4.42218	9.77088e-06	0.000236211
ENSG00000204952	FBXO47	7.59393	1.18743	58.7141	18.9528	160.829	252.322	125.59	100.124	3.04366	0.6986	-4.3568	1.31979e-05	0.000302413
ENSG00000283361	CFAP97D2	0	4.71026	5.42664	5.20263	26.1437	54.8194	18.8646	14.3462	3.03968	0.584477	-5.20069	1.9855e-07	9.8961e-06
ENSG00000121101	TEX14	43.9215	27.5315	310.054	224.037	1096.44	1880.07	747.021	968.62	3.03573	0.583014	-5.20696	1.91964e-07	9.64258e-06
ENSG00000277174	AC095038.2	0	1.12107	0	1.92682	4.46649	12.7736	2.58608	3.95266	3.03376	1.15674	-2.62268	0.00872419	0.0401787
ENSG00000065618	COL17A1	23.5857	5.39228	68.887	18.9445	285.001	233.603	187.943	148.636	3.03339	0.605937	-5.00612	5.55392e-07	2.2803e-05
ENSG00000124232	RBPJL	1.52652	0	1.31067	3.19341	20.2645	12.8584	6.67887	7.12924	3.03219	0.880663	-3.44308	0.000575133	0.00540625
ENSG00000228759	FAF2P1	0	1.2381	1.04586	2.01779	13.5283	11.8837	1.84726	8.25992	3.03167	0.985252	-3.07705	0.00209061	0.0140724
ENSG00000231590	AC235565.1	2.31409	0	6.30347	4.02094	38.2714	25.2439	16.3815	9.44785	3.03099	0.676454	-4.48071	7.43951e-06	0.000188914
ENSG00000254237	AC021242.2	2.07272	2.80283	9.5161	0	41.5864	19.8051	30.1725	21.3342	3.03067	0.820226	-3.69492	0.000219953	0.00261186
ENSG00000265287	AC005726.4	6.22348	2.28272	8.49541	1.93791	35.3931	65.5078	17.3271	41.5404	3.03057	0.60381	-5.01908	5.19208e-07	2.16211e-05
ENSG00000227088	AC012494.1	0	0	0.273941	3.87406	7.50994	4.72367	1.76288	5.21379	3.02945	1.10081	-2.75201	0.00592308	0.0303789
ENSG00000268696	ZNF723	4.11878	3.41772	14.9767	11.6214	81.4968	93.3168	37.544	63.7851	3.0293	0.597221	-5.07233	3.92972e-07	1.72586e-05
ENSG00000228927	TSPY3	20.9728	5.35842	0	30.0384	208.144	98.4043	41.2829	42.0541	3.02907	0.971188	-3.11893	0.00181508	0.012658
ENSG00000286276	AL390066.2	0	0	2.13541	2.02522	8.94881	13.4176	4.62631	4.98174	3.02903	0.977831	-3.0977	0.00195029	0.013349
ENSG00000231216	GS1-600G8.3	9.3756	4.95322	39.0921	43.6041	221.634	250.491	127.569	78.3323	3.02847	0.543082	-5.57645	2.45476e-08	1.81833e-06
ENSG00000170608	FOXA3	1.12489	1.13585	5.97221	4.65255	26.006	26.0177	29.5457	13.6869	3.02604	0.575183	-5.26101	1.43266e-07	7.62538e-06
ENSG00000205452	AC140658.1	2.60917	0	8.75227	2.2978	24.0857	38.0618	22.7855	18.7952	3.0187	0.758483	-3.97992	6.89383e-05	0.00109723
ENSG00000100721	TCL1A	1.96937	1.82306	19.2355	10.2888	72.4452	103.167	35.2026	37.7386	3.01783	0.590481	-5.1108	3.2079e-07	1.45661e-05
ENSG00000171483	SSX6P	0	0	8.93377	11.3962	45.3099	56.2198	23.5986	17.0432	3.01631	0.946691	-3.18616	0.00144175	0.0106968
ENSG00000256625	AC092747.2	4.49975	6.16881	22.5894	17.9739	103.502	151.641	61.0513	64.3442	3.01618	0.465045	-6.48579	8.8269e-11	1.57648e-08
ENSG00000142319	SLC6A3	5.33619	2.1069	0.906877	0.849712	16.6737	11.8433	9.28704	7.74146	3.01114	0.906593	-3.32138	0.000895741	0.00754224
ENSG00000215477	RCN1P1	0	0	2.18759	2.06153	11.394	8.94757	6.60303	7.72444	3.00848	0.90476	-3.32517	0.000883657	0.00746199
ENSG00000010318	PHF7	215.087	180.518	486.312	218.609	1779.58	3657.34	1214.52	5473.13	3.00595	0.396537	-7.58051	3.44195e-14	2.16964e-11
ENSG00000172818	OVOL1	2.69422	0	19.1268	22.1064	120.879	93.5249	49.3721	244.296	3.00566	0.609345	-4.9326	8.11409e-07	3.10908e-05
ENSG00000090889	KIF4A	7.30839	13.232	32.8373	55.9384	245.532	270.817	140.94	82.2846	3.00561	0.54111	-5.55453	2.78359e-08	2.00373e-06
ENSG00000148773	MKI67	40.384	103.493	102.577	85.3113	712.183	833.797	436.327	350.52	3.00478	0.345046	-8.70834	3.08345e-18	9.01153e-15
ENSG00000134183	GNAT2	1.818	1.92703	0	5.68431	18.3394	24.7265	6.37881	14.6146	3.0035	0.80467	-3.73259	0.000189521	0.00234123
ENSG00000129152	MYOD1	1.31492	0	2.25405	0	6.38842	12.7897	1.8864	4.38296	3.00259	1.1385	-2.63731	0.00835656	0.0389625
ENSG00000265933	LINC00668	11.7034	19.0817	66.2435	41.776	180.676	408.648	240.529	351.329	3.00231	0.447696	-6.70615	1.99829e-11	4.37014e-09
ENSG00000217950	NOC2LP2	1.23163	2.55175	10.968	17.3684	79.8464	64.5119	55.0521	37.0175	3.00177	0.515822	-5.81938	5.90668e-09	5.44091e-07
ENSG00000286263	AL391832.4	2.31047	3.67682	3.13068	0	7.35356	31.9137	14.6327	9.63462	3.00085	0.826309	-3.63163	0.000281636	0.0031713
ENSG00000224863	LINC01398	0	1.00961	0	2.24683	3.91103	12.7559	2.88689	6.39425	3.00035	1.13996	-2.63198	0.00848889	0.0394251
ENSG00000215474	SKOR2	2.46763	0	8.80459	4.33134	26.5424	38.7202	30.6112	15.1907	2.99907	0.607613	-4.93583	7.98124e-07	3.06548e-05
ENSG00000286121	AC093298.2	2.12251	1.16997	0.960443	0	10.5732	12.5625	2.67584	4.06741	2.99889	1.01455	-2.95589	0.00311772	0.0189575
ENSG00000115155	OTOF	5.83026	5.93504	31.9571	20.8918	147.376	179.767	48.5497	53.2847	2.99702	0.651461	-4.60046	4.21568e-06	0.00011744
ENSG00000269586	CT45A10	15.5352	2.84375	35.1305	59.7246	278.072	282.867	118.255	88.4157	2.99679	0.639932	-4.68299	2.82723e-06	8.58571e-05
ENSG00000221843	C2orf16	3.37802	2.42018	18.2974	4.02779	61.4204	58.7276	48.7386	670.938	2.99008	0.960304	-3.11368	0.00184769	0.0128127
ENSG00000239468	RN7SL569P	1.22747	0	1.19356	1.0261	3.82318	13.1181	3.70583	5.20821	2.9857	1.11113	-2.6871	0.00720758	0.0349381
ENSG00000267293	AC012569.1	1.15967	0	6.23149	5.09603	25.8289	41.4212	9.27399	28.1207	2.9847	0.823776	-3.6232	0.000290986	0.00325152
ENSG00000277726	AL109811.3	3.16992	0	1.14384	1.38258	7.24716	17.6712	6.25493	6.86116	2.98265	0.997762	-2.98934	0.00279576	0.0175108
ENSG00000267075	AC015818.8	47.494	18.9786	163.104	120.166	849.99	930.006	298.082	784.964	2.98227	0.549568	-5.42657	5.74475e-08	3.61413e-06
ENSG00000187642	PERM1	1.87734	1.49009	4.52133	9.68273	53.3334	5.51403	43.2837	17.1408	2.98183	0.914478	-3.26069	0.00111143	0.00882101
ENSG00000179902	C1orf194	0	1.43303	5.82416	0	12.7955	22.241	3.0685	169.646	2.97966	0.89131	-3.34301	0.000828744	0.00711414
ENSG00000272975	MYHAS	0	0	4.21238	3.05043	15.0057	21.5243	9.16309	12.0454	2.97782	0.712881	-4.17716	2.95172e-05	0.000566518
ENSG00000287587	AL158216.1	1.16775	1.26046	1.05987	1.01203	6.26256	14.841	5.53466	17.7572	2.97709	0.873077	-3.40988	0.000649914	0.00593226
ENSG00000187166	H1-7	1.30719	0	4.57411	6.39148	30.712	33.0173	10.6422	298.754	2.97659	0.813608	-3.65851	0.00025369	0.00292002
ENSG00000196427	NBPF4	0	0	10.8122	4.09324	32.3145	34.6658	22.9036	57.1497	2.97354	0.790901	-3.75969	0.000170125	0.00216515
ENSG00000145975	FAM217A	3.46086	2.93589	12.318	5.56962	26.3792	78.5411	41.1335	119.512	2.97349	0.58235	-5.10602	3.29007e-07	1.48344e-05
ENSG00000183185	GABRR3	0.792413	0	2.14662	0.745129	13.3959	8.61813	2.66752	5.15783	2.97245	1.01876	-2.91772	0.00352598	0.0207
ENSG00000287243	THCAT155	2.33829	0	6.88097	4.21805	37.8452	32.0265	12.7968	12.5151	2.9714	0.64768	-4.58775	4.48041e-06	0.000122879
ENSG00000284800	AC235565.2	0	0	31.9741	29.2527	123.084	163.219	75.6741	46.8443	2.97004	0.969201	-3.06443	0.00218087	0.0145428
ENSG00000214335	CTAGE16P	0	0	3.00589	2.01685	8.26023	17.1456	6.39463	15.6739	2.96832	0.87311	-3.39971	0.000674562	0.00608939
ENSG00000257056	LINC02282	0	1.21938	4.24806	5.13616	21.8198	29.5479	15.0794	12.2106	2.96778	0.642748	-4.61733	3.88715e-06	0.000110295
ENSG00000188877	POTEA	0	0	7.62911	0.971137	4.80291	46.7169	1.74972	112.093	2.96555	1.01041	-2.93498	0.00333565	0.0199025
ENSG00000161132	AC007663.1	0	0	1.10763	3.1191	10.4443	8.08567	7.53497	3.98018	2.96356	0.959436	-3.08885	0.00200931	0.0136507
ENSG00000271981	AL158211.2	0	1.21603	3.10371	1.00322	7.44468	19.5507	5.37298	5.80342	2.96288	0.936254	-3.16461	0.00155289	0.01131
ENSG00000278338	VWA8-AS1	0	0	7.98295	2.66319	19.4115	40.5452	7.98197	17.837	2.96134	0.796288	-3.71893	0.000200066	0.00244201
ENSG00000205359	SLCO6A1	0	7.22919	23.7106	15.9293	61.2725	159.304	63.5826	221.791	2.9586	0.573273	-5.1609	2.45771e-07	1.17926e-05
ENSG00000240707	LINC01168	0.469434	0	19.0888	12.0692	59.838	93.2838	27.2049	33.5911	2.95819	1.06531	-2.77683	0.00548913	0.0287824
ENSG00000169679	BUB1	81.2971	69.935	335.717	176.747	1444.64	1619.63	818.915	878.537	2.95489	0.417547	-7.07679	1.47528e-12	5.04546e-10
ENSG00000183304	FAM9A	3.52938	1.26495	21.2093	18.3268	102.178	91.755	69.1556	37.9004	2.95114	0.523167	-5.64092	1.6914e-08	1.31979e-06
ENSG00000260653	AC237221.1	4.20059	13.6988	26.5358	9.20341	83.3101	157.56	60.396	200.663	2.94892	0.552455	-5.33785	9.40555e-08	5.36116e-06
ENSG00000230570	AL139095.3	0	1.22725	0	3.00445	7.83273	14.0103	3.65901	6.32344	2.94751	1.00799	-2.92416	0.00345391	0.0203999
ENSG00000131650	KREMEN2	1.51486	2.14879	8.76709	1.18393	34.7019	22.7514	26.0934	12.7201	2.94192	0.628855	-4.67822	2.89379e-06	8.70248e-05
ENSG00000103067	ESRP2	9.41935	3.39854	8.1961	3.04314	49.754	43.4799	30.4307	131.741	2.93942	0.452344	-6.49819	8.12945e-11	1.48492e-08
ENSG00000077327	SPAG6	23.3365	7.97325	79.1374	86.5108	319.63	625.502	186.257	765.905	2.93644	0.591389	-4.96532	6.85881e-07	2.6929e-05
ENSG00000248608	AC133963.1	1.30113	1.28729	4.48071	4.10913	28.9868	24.2659	13.2189	12.4474	2.93642	0.611551	-4.80159	1.57411e-06	5.35498e-05
ENSG00000187686	KRT18P59	5.21259	13.0019	17.9649	12.8331	96.5925	157.727	27.325	112.84	2.93427	0.56602	-5.18404	2.17133e-07	1.05603e-05
ENSG00000139800	ZIC5	1.14646	1.1839	55.8765	10.6381	66.6806	248.48	79.7643	103.469	2.9267	0.886	-3.30328	0.000955621	0.00790257
ENSG00000234629	WDR82P1	1.17355	1.24895	10.6359	8.02537	42.502	52.311	30.2327	28.9809	2.9259	0.502854	-5.81858	5.93493e-09	5.45131e-07
ENSG00000186288	PABPC1L2A	2.38293	1.23995	5.31459	4.06944	32.8772	25.3594	17.4247	11.1947	2.92561	0.712405	-4.10666	4.01418e-05	0.00072134
ENSG00000260426	AC008060.4	2.43048	0	3.25563	0	17.6149	9.04096	5.56709	5.30165	2.92496	0.912014	-3.20715	0.00134059	0.0101382
ENSG00000250081	AC025176.1	0	2.56561	0	0.985392	9.84651	6.75105	2.69668	6.32037	2.92369	1.07704	-2.71456	0.00663647	0.0329602
ENSG00000233436	BTBD18	5.41366	0	27.3976	25.434	167.993	94.9519	73.4495	51.215	2.92348	0.680516	-4.29598	1.73922e-05	0.000378042
ENSG00000229926	IL9RP1	0	2.59005	3.33167	1.02128	23.3686	9.86647	5.66409	5.02117	2.91598	1.05701	-2.75871	0.00580291	0.0299271
ENSG00000259010	NUP50P1	1.15809	0	1.03925	7.07335	17.1399	23.9643	13.7098	9.30916	2.91409	0.779417	-3.7388	0.000184898	0.00230035
ENSG00000234139	AL035420.1	7.65924	2.64275	11.9044	1.33611	40.4123	52.2125	27.7293	31.0315	2.91408	0.501716	-5.80823	6.31376e-09	5.75e-07
ENSG00000005189	REXO5	210.367	109.952	385.011	84.7911	1308.22	2280.04	881.962	2353.51	2.91395	0.546838	-5.32872	9.89073e-08	5.59801e-06
ENSG00000248229	AC106872.4	0	1.26954	2.1508	2.01826	3.10392	22.057	6.44269	8.64812	2.91375	0.930191	-3.13242	0.00173374	0.0122336
ENSG00000281491	DNAJB5-DT	2.38058	1.24712	4.37001	1.02021	16.881	20.4618	13.8293	7.75048	2.91289	0.700383	-4.159	3.19641e-05	0.000603395
ENSG00000165496	RPL10L	1.20131	1.26209	22.9139	12.0788	80.8222	94.3695	40.3715	147.987	2.91249	0.618642	-4.70788	2.50307e-06	7.81815e-05
ENSG00000146857	STRA8	0	0	3.03782	3.82015	23.4282	8.95499	8.70071	7.64918	2.91163	0.935458	-3.11251	0.00185501	0.0128468
ENSG00000258692	SALL4P7	0	1.22668	4.18226	11.1246	28.1537	52.1347	16.4604	16.8722	2.91037	0.702421	-4.14334	3.42285e-05	0.000636793
ENSG00000233342	AL139393.2	0	0.852443	2.16622	6.36502	12.8691	27.1231	12.5824	11.4733	2.90968	0.80562	-3.61173	0.000304165	0.00336255
ENSG00000146005	PSD2	11.9969	6.77489	42.9084	12.0166	144.156	121.025	121.726	53.6882	2.90966	0.474795	-6.12825	8.88506e-10	1.09128e-07
ENSG00000249515	LINC02113	1.23385	0	1.1506	1.02631	5.67836	9.17803	4.65893	5.40274	2.90852	1.05148	-2.76612	0.00567285	0.0294431
ENSG00000264177	AL353997.2	13.7188	3.7795	38.4206	40.2375	195.022	260.132	91.4783	208.106	2.90776	0.53068	-5.47931	4.26996e-08	2.8187e-06
ENSG00000220008	LINGO3	0	0	2.3501	1.12248	12.5518	1.96005	4.84996	5.7647	2.90624	1.11133	-2.6151	0.0089201	0.0408495
ENSG00000069018	TRPC7	2.3937	0.828872	3.55252	11.2719	45.3203	37.8411	6.78045	21.0112	2.90619	0.76572	-3.79537	0.000147426	0.00195119
ENSG00000215148	PRSS41	0	0	1.08413	5.03922	16.5267	14.0337	5.48286	8.31314	2.90472	1.08926	-2.66668	0.00766056	0.0365877
ENSG00000268505	AC135012.3	0	0	2.09948	1.01978	4.15294	11.8771	2.75933	123.214	2.90306	1.04268	-2.78422	0.00536565	0.0283429
ENSG00000258957	AL359317.2	1.93205	0	7.78695	6.1475	22.7232	47.0161	19.5518	43.4542	2.90273	0.565395	-5.13399	2.83662e-07	1.31359e-05
ENSG00000146047	H2BC1	112.206	34.8788	1007.73	663.456	2918.76	4848	2427.67	10172.8	2.9019	0.999798	-2.90249	0.00370206	0.0214478
ENSG00000261303	AC022748.2	2.64821	6.37999	31.1129	15.8556	115.362	145.589	55.8552	116.26	2.9004	0.606974	-4.77846	1.76643e-06	5.90917e-05
ENSG00000251365	LINC02236	5.43511	0.834583	6.7343	2.85412	23.1017	38.5931	21.8696	13.9065	2.89887	0.564211	-5.13792	2.77802e-07	1.29244e-05
ENSG00000198054	DSCR8	1.43506	3.40274	13.172	26.8727	113.295	100.306	44.3398	72.0966	2.89716	0.595485	-4.86522	1.14329e-06	4.0975e-05
ENSG00000179008	C14orf39	6.71578	4.41895	70.2197	71.4739	234.884	466.238	144.667	201.804	2.89704	0.786516	-3.68338	0.00023016	0.00270779
ENSG00000225280	AL158013.1	1.4815	0	9.88694	7.79132	32.39	49.3829	28.7047	25.6684	2.89684	0.670741	-4.31886	1.56839e-05	0.000347011
ENSG00000269956	MKNK1-AS1	0	0	0.914456	1.75725	8.63688	5.5967	1.59676	12.9957	2.89621	1.06087	-2.73002	0.006333	0.0318812
ENSG00000164508	H2AC1	56.3196	24.3048	465.151	253.704	1207.17	2241.63	1013.39	3702.48	2.89489	0.86106	-3.362	0.000773789	0.00675972
ENSG00000231482	AC105450.1	0.966062	0	0.86624	2.52632	13.449	9.43968	4.58131	4.17113	2.89356	1.02188	-2.83159	0.00463166	0.02531
ENSG00000134588	USP26	1.7891	1.31362	9.17207	12.7224	47.1436	44.0965	49.9695	30.2054	2.89267	0.610946	-4.73473	2.19343e-06	7.00718e-05
ENSG00000233002	TBC1D26-AS1	1.49651	0	5.80322	1.84444	25.0845	17.161	9.51665	7.84849	2.89186	0.726965	-3.97798	6.95018e-05	0.00110279
ENSG00000276627	AL117372.1	0.924017	2.8574	28.8438	12.2326	92.9626	119.09	35.262	46.9676	2.88963	0.7099	-4.07047	4.69188e-05	0.000809199
ENSG00000255042	AC109635.2	2.05753	1.09023	12.0199	14.3294	59.3447	83.5659	25.1322	82.7904	2.88945	0.678302	-4.25983	2.04584e-05	0.000428187
ENSG00000253100	AC009623.1	0	1.74313	2.92661	1.12458	10.9423	14.4366	4.75796	58.8025	2.88792	0.997423	-2.89538	0.00378694	0.0218451
ENSG00000231167	YBX1P2	1.22238	2.55626	1.0991	0	6.59245	12.7406	6.55278	16.8215	2.88697	0.990462	-2.91477	0.00355949	0.0208587
ENSG00000077800	FKBP6	26.0597	33.3929	152.739	115.764	694.301	773.063	341.026	526.691	2.88647	0.519892	-5.55206	2.82324e-08	2.01692e-06
ENSG00000287429	AC009121.4	1.23709	2.62796	2.25546	3.05538	13.3659	25.0546	13.1214	11.8279	2.8839	0.64761	-4.45313	8.46257e-06	0.000209434
ENSG00000177504	VCX2	6.26351	5.14974	45.7301	58.8887	280.07	240.393	125.624	72.9221	2.88242	0.685563	-4.20445	2.61715e-05	0.000520059
ENSG00000278678	CYCSP41	0	0	6.85416	2.05044	10.9777	26.1393	12.8768	13.7294	2.88143	0.7745	-3.72038	0.000198925	0.00243065
ENSG00000117983	MUC5B	0.802203	2.39094	6.21051	5.076	12.9056	11.2058	61.8799	20.4817	2.88097	0.920692	-3.12914	0.0017532	0.0123336
ENSG00000234244	AL512641.1	0	0	1.81375	2.04316	7.46152	7.17431	8.29511	4.16787	2.88004	1.02795	-2.80174	0.00508286	0.0272158
ENSG00000225509	AIFM1P1	1.16469	1.2283	3.14806	5.03951	17.8319	34.7652	7.31637	8.32019	2.87871	0.869378	-3.31123	0.000928876	0.00774794
ENSG00000187812	AC019294.1	0	0	1.57317	1.53673	10.9148	3.4694	3.35606	38.4424	2.87455	1.11874	-2.56946	0.0101857	0.0449079
ENSG00000169994	MYO7B	2.48127	8.25921	43.5111	17.4306	178.407	138.983	71.1163	62.7643	2.87335	0.670825	-4.2833	1.8414e-05	0.000393576
ENSG00000213194	CDK7P1	0	0	3.92387	0	8.5816	10.7795	4.44934	7.42593	2.87292	0.976827	-2.94107	0.00327077	0.0196348
ENSG00000105982	RNF32	5.61969	2.95426	36.9218	59.316	143.753	292.158	111.602	300.691	2.87256	0.656794	-4.37361	1.2221e-05	0.000283056
ENSG00000099958	DERL3	24.9066	12.9153	22.9481	21.3175	172.463	177.437	104.204	122.597	2.87144	0.38445	-7.46895	8.0835e-14	4.33114e-11
ENSG00000236279	CLEC2L	1.58481	0	3.17665	2.01175	18.1931	11.9597	8.1565	6.79358	2.86854	0.804232	-3.56681	0.000361355	0.0038251
ENSG00000241462	AC100832.1	0	0	6.36358	3.91783	11.4264	30.855	16.6975	12.9535	2.86431	0.746904	-3.83491	0.000125608	0.00172419
ENSG00000196570	PFN3	0	0	0	3.37011	8.1216	5.48326	4.81171	17.3744	2.8599	1.11449	-2.5661	0.0102849	0.0452426
ENSG00000138152	BTBD16	0	0	0.679577	7.54937	12.1257	9.30818	6.43168	25.1631	2.85805	0.996065	-2.86934	0.00411334	0.0232627
ENSG00000237265	BX276092.7	2.44567	4.17806	29.415	23.0855	136.504	107.68	69.7634	41.0103	2.85233	0.654752	-4.35636	1.32245e-05	0.000302806
ENSG00000267244	AC012615.6	0	0	2.04674	1.34175	8.64646	6.08224	5.51836	42.7169	2.85103	1.03487	-2.75496	0.00586993	0.0301815
ENSG00000253404	AC034243.1	1.27537	1.32391	2.29538	0	2.60184	13.6222	9.61109	6.76288	2.84964	0.958081	-2.97432	0.0029364	0.0181398
ENSG00000181626	ANKRD62	74.3261	72.0855	184.708	106.007	626.918	1399.04	339.279	670.628	2.84649	0.432896	-6.57545	4.85073e-11	9.33781e-09
ENSG00000287378	AC129803.1	1.0583	0	0.950926	1.99256	6.79278	12.2425	3.60389	6.14656	2.84387	1.04126	-2.73118	0.00631086	0.0318185
ENSG00000181652	ATG9B	16.2747	5.84393	44.7337	11.1839	152.256	183.715	85.8675	160.262	2.84294	0.583077	-4.87576	1.0839e-06	3.94623e-05
ENSG00000213365	AP000593.1	0	0	2.19836	2.03076	7.36049	11.0473	5.60197	5.95484	2.84285	0.922574	-3.08143	0.00206009	0.0139199
ENSG00000281473	PISRT1	0	0	3.0684	1.96977	14.2613	9.31068	5.38129	4.20716	2.84246	0.942905	-3.01458	0.00257336	0.0164372
ENSG00000198555	AC133561.1	1.22091	1.25864	56.4952	13.3637	162.589	171.672	56.637	56.7699	2.84094	0.885471	-3.2084	0.00133477	0.0101061
ENSG00000281016	AC092574.2	0	1.25462	2.12187	0	7.21733	6.31595	4.58641	3.97281	2.83934	1.04221	-2.72435	0.00644278	0.0323073
ENSG00000177324	BEND2	73.948	72.4217	186.889	123.415	793.513	1064.28	602.753	331.934	2.8363	0.298082	-9.51517	1.81409e-21	1.16639e-17
ENSG00000158553	POM121L2	0	0	5.85814	2.76998	3.48492	32.0555	13.1562	94.7867	2.83576	0.786526	-3.60542	0.000311643	0.00342871
ENSG00000249035	CLMAT3	2.32274	1.62985	1.66652	0.663893	20.4128	6.35946	8.10394	7.39747	2.833	0.912362	-3.10513	0.00190195	0.0130873
ENSG00000139797	RNF113B	2.5179	1.28234	33.354	10.3907	77.0789	133.341	46.2662	257.272	2.82883	0.657159	-4.30464	1.67256e-05	0.000365281
ENSG00000237119	LINC01056	1.23671	0	6.60251	9.21687	38.8271	40.2617	14.9392	16.0459	2.82844	0.674239	-4.19501	2.7286e-05	0.00053618
ENSG00000214646	COMMD4P1	14.0628	4.76422	21.4277	3.70195	86.8798	89.9694	50.8353	66.3832	2.82613	0.458938	-6.15796	7.36859e-10	9.40021e-08
ENSG00000154438	ASZ1	22.5924	14.4629	82.7921	75.4748	371.273	473.192	190.529	198.151	2.82149	0.496121	-5.6871	1.29213e-08	1.06406e-06
ENSG00000166863	TAC3	2.25221	2.9472	5.37779	4.7212	17.6353	46.2858	20.1388	21.4049	2.81869	0.550019	-5.12472	2.9798e-07	1.37045e-05
ENSG00000128408	RIBC2	5.00463	7.06485	17.8207	20.8999	103.556	135.345	33.679	148.806	2.81798	0.524482	-5.3729	7.74823e-08	4.61278e-06
ENSG00000140534	TICRR	40.9303	19.9092	146.821	105.627	739.756	573.296	349.111	223.947	2.81722	0.525648	-5.35952	8.34441e-08	4.84287e-06
ENSG00000269037	LINC01838	0	0	5.43582	0	0.966426	24.794	3.69901	92.6529	2.81414	1.05052	-2.6788	0.00738868	0.0356226
ENSG00000187902	SHISA7	0	2.24118	1.98587	0	9.95932	7.20877	5.86046	8.14968	2.81237	0.992684	-2.8331	0.00460987	0.0252209
ENSG00000121270	ABCC11	13.9497	18.699	26.3876	33.9008	212.362	175.878	90.58	140.629	2.81161	0.32428	-8.67032	4.30921e-18	1.15444e-14
ENSG00000226754	AL606760.1	12.7794	4.94664	23.4283	8.75602	89.9408	118.097	57.6756	96.2651	2.81157	0.434136	-6.47624	9.40393e-11	1.67026e-08
ENSG00000223559	AC073136.1	2.1778	0	1.95969	2.93939	8.17385	21.2899	9.70627	11.5803	2.81047	0.705475	-3.9838	6.78212e-05	0.00108419
ENSG00000170516	COX7B2	1.40162	1.23618	14.925	11.4313	42.7052	80.8005	35.9054	94.2292	2.80728	0.571553	-4.91167	9.03053e-07	3.38361e-05
ENSG00000178125	PPP1R42	4.94519	0	4.98306	3.00506	10.3635	52.7819	7.05339	45.9816	2.80431	0.746561	-3.75631	0.00017244	0.00218607
ENSG00000230798	FOXD3-AS1	1.40785	1.90253	4.09061	0	14.5994	12.7119	12.1051	14.2739	2.80387	0.717261	-3.90913	9.26275e-05	0.00137473
ENSG00000242911	AC140059.1	0	0	1.10011	2.97679	6.78466	10.0277	6.30115	7.46127	2.80292	0.950507	-2.94887	0.00318938	0.019244
ENSG00000054356	PTPRN	0	9.59323	5.48993	11.1144	44.6055	65.4417	20.7436	18.4796	2.80046	0.785273	-3.56622	0.000362171	0.00383122
ENSG00000165188	RNF183	4.10907	2.56082	8.94102	1.46073	21.7817	46.8154	20.459	23.4757	2.79862	0.604317	-4.63104	3.63831e-06	0.000104339
ENSG00000251676	SNHG27	29.5642	28.2984	63.5028	12.1124	98.8224	373.022	220.4	447.248	2.79709	0.54811	-5.10315	3.34046e-07	1.50195e-05
ENSG00000168505	GBX2	2.1995	0	0	1.88925	6.81692	11.1519	4.12304	4.25877	2.79534	1.00074	-2.79326	0.00521791	0.0277541
ENSG00000257016	SLC25A39P2	0	0	2.42827	2.10928	6.10905	14.1789	3.805	6.61256	2.79416	0.964701	-2.89641	0.00377464	0.021782
ENSG00000159374	M1AP	18.9368	16.1587	77.3233	31.5316	256.693	291.175	192.823	141.987	2.79177	0.418093	-6.67739	2.43232e-11	5.11074e-09
ENSG00000125084	WNT1	1.24088	0	7.46212	0	12.1727	14.1513	20.3188	8.97237	2.79067	0.845523	-3.30052	0.000965058	0.00794079
ENSG00000105131	EPHX3	1.22402	5.16384	3.39558	6.19783	30.5565	37.7123	15.7391	17.0639	2.78649	0.54539	-5.10917	3.23579e-07	1.46513e-05
ENSG00000199197	RN7SKP72	2.50354	0	1.18269	2.0713	9.5323	16.7892	3.76842	5.56922	2.78469	0.967624	-2.87787	0.00400375	0.0227971
ENSG00000268660	LETM1P2	3.74684	0	13.2803	11.2976	52.4601	63.9862	34.0259	57.6374	2.78298	0.48873	-5.69432	1.23867e-08	1.02896e-06
ENSG00000143512	HHIPL2	1.8671	3.25287	25.3988	6.49162	33.227	107.038	28.6636	131.963	2.7815	0.653355	-4.25726	2.06951e-05	0.000430341
ENSG00000287080	H3C3	62.5325	37.5098	200.762	173.588	728.878	1112.01	612.33	462.607	2.78115	0.453202	-6.13668	8.42625e-10	1.04995e-07
ENSG00000229258	LPGAT1-AS1	0	1.36291	1.82899	1.72963	5.88751	14.6146	4.9764	22.536	2.77963	0.985492	-2.82056	0.00479405	0.0259705
ENSG00000286729	AC137695.3	2.4223	3.8095	3.26966	0	10.9798	27.3359	9.28328	13.7488	2.77813	0.714704	-3.88711	0.000101446	0.00147236
ENSG00000263938	AC100832.2	0.980191	0	0.89349	2.83831	5.28213	15.1325	5.08327	5.80596	2.7765	0.998472	-2.78075	0.00542339	0.0285407
ENSG00000267053	AC092296.2	455.903	294.89	493.708	422.774	2715.76	3586.89	2267.55	3201.03	2.77626	0.282926	-9.81267	9.93091e-23	7.98147e-19
ENSG00000285303	AC004381.4	1.05666	2.30577	0	0.963482	3.75573	12.8958	5.20861	7.64246	2.77612	0.926809	-2.99536	0.00274124	0.0172659
ENSG00000196092	PAX5	9.57857	1.53908	10.5837	3.80714	53.2149	42.1205	35.9581	30.8424	2.77554	0.538113	-5.15792	2.49709e-07	1.19459e-05
ENSG00000226049	TLK2P1	4.48591	7.20645	11.1126	1.98998	41.9416	65.977	19.8451	24.1659	2.77452	0.534777	-5.18818	2.12359e-07	1.03911e-05
ENSG00000174279	EVX2	1.21734	0	10.6965	2.10232	18.8685	30.7274	25.1209	40.1705	2.77433	0.598677	-4.6341	3.58486e-06	0.00010299
ENSG00000260389	WBP11P1	3.15771	0	6.7919	3.80889	18.3071	47.3701	7.74467	19.9642	2.77393	0.753226	-3.68274	0.000230741	0.0027122
ENSG00000255507	UVRAG-DT	1.84387	0	7.12361	1.33314	10.612	23.6397	11.2163	50.9524	2.76725	0.616199	-4.49084	7.09433e-06	0.000182455
ENSG00000237850	AC091304.1	0	0	6.82899	0	9.94493	13.9656	10.8796	99.184	2.7667	0.812296	-3.40603	0.000659148	0.0059926
ENSG00000261764	KRT18P18	0	1.28605	3.35366	2.06635	13.3251	14.9446	6.6536	7.67054	2.76662	0.76954	-3.59517	0.000324182	0.0035174
ENSG00000264334	AC134978.1	0	1.27072	7.68337	5.05539	24.2147	31.9626	17.5646	11.7533	2.76629	0.642225	-4.30736	1.65213e-05	0.000361556
ENSG00000279359	AL359195.2	2.30746	4.87223	9.37021	2.01424	8.24296	74.4287	12.713	84.5911	2.76512	0.746616	-3.70353	0.000212617	0.00255236
ENSG00000249053	AC106794.1	0	0	4.61811	4.14133	12.7863	22.4307	10.5234	10.3308	2.76058	0.805734	-3.42616	0.000612177	0.0056585
ENSG00000172987	HPSE2	6.01388	4.94573	33.2169	30.4598	208.37	92.9586	80.937	78.3027	2.76035	0.561182	-4.91881	8.70727e-07	3.27011e-05
ENSG00000156414	TDRD9	91.2611	114.837	668.698	464.92	2416.09	3015.37	1381.45	1408.54	2.7603	0.601968	-4.58545	4.53003e-06	0.000124047
ENSG00000121152	NCAPH	45.6828	30.3749	202.015	120.875	808.053	927.802	286.105	554.046	2.75994	0.51408	-5.36869	7.93091e-08	4.67822e-06
ENSG00000166984	TCP10L2	1.57788	2.6721	15.3475	8.09423	32.682	113.203	4.72135	90.5515	2.75621	0.847116	-3.25363	0.00113939	0.00897087
ENSG00000285758	AC036214.4	0.999216	1.50982	6.83434	3.66671	24.1884	29.1698	15.3713	11.7589	2.75596	0.619535	-4.44843	8.65009e-06	0.000213808
ENSG00000197472	ZNF695	1.35034	3.70991	14.5484	19.758	28.9549	109.852	57.7051	42.5336	2.75138	0.678823	-4.05316	5.05295e-05	0.000859027
ENSG00000177359	AC024940.1	41.7035	11.4187	42.5144	54.6769	149.258	506.014	107.882	461.093	2.75051	0.575754	-4.77722	1.77732e-06	5.93327e-05
ENSG00000285467	AL136419.1	0	7.65901	7.73814	0	31.2774	29.832	14.9989	20.7579	2.74918	0.762734	-3.60437	0.000312911	0.00343731
ENSG00000214182	PTMAP5	0	1.14862	4.84192	3.78093	21.5301	20.4051	9.45309	6.37381	2.74886	0.801381	-3.43016	0.000603232	0.00560187
ENSG00000161860	SYCE2	3.75302	12.9597	33.5061	11.0707	114.99	116.644	58.0897	84.9787	2.74845	0.548082	-5.01467	5.31241e-07	2.20082e-05
ENSG00000239642	MEIKIN	2.2403	5.44187	67.9434	16.1762	126.338	239.497	86.4669	85.5945	2.74756	0.821352	-3.34517	0.000822323	0.00707792
ENSG00000124159	MATN4	0	2.51214	10.4812	13.6089	70.4511	41.9778	23.3711	18.7331	2.74745	0.679543	-4.04308	5.2754e-05	0.00088707
ENSG00000136110	CNMD	0	0.904492	6.92718	6.63998	19.5927	41.7501	9.41506	14.6195	2.74668	0.783812	-3.50426	0.000457876	0.00457044
ENSG00000260907	AC015818.2	8.91799	6.08128	35.5732	19.8807	102.457	175.685	80.4603	105.099	2.74324	0.456109	-6.01444	1.80515e-09	1.92365e-07
ENSG00000035499	DEPDC1B	8.01104	6.24943	51.6007	22.9974	125.295	245.099	74.5536	115.559	2.74064	0.589853	-4.64631	3.37931e-06	9.88518e-05
ENSG00000243507	AC005908.1	1.23263	1.30553	2.25692	0	2.87559	17.8202	2.77316	14.7355	2.73899	1.00667	-2.72085	0.00651133	0.0325243
ENSG00000270038	AL133467.4	0	0	4.23669	2.03342	5.35168	20.1025	7.34025	6.11369	2.73858	0.927935	-2.95126	0.0031648	0.0191425
ENSG00000230449	RPL7P4	1.12127	2.45118	0	0.9864	7.65937	10.9322	3.63414	8.16856	2.73799	0.93676	-2.92283	0.00346866	0.0204644
ENSG00000118156	ZNF541	219.821	28.2157	196.795	96.5243	1001.03	1060.81	615.08	580.797	2.73791	0.487561	-5.61553	1.95958e-08	1.49636e-06
ENSG00000226835	ARHGAP29-AS1	0.762157	0	9.39734	1.53716	30.6774	14.5484	13.6725	22.2525	2.7378	0.738571	-3.70689	0.000209816	0.00253007
ENSG00000175229	GAL3ST3	0	0	4.49954	4.28394	7.97088	25.4435	14.4353	8.08608	2.7335	0.837969	-3.26205	0.00110609	0.00878209
ENSG00000131187	F12	0	0	1.7107	5.52393	16.8967	12.2907	11.151	11.3064	2.72999	0.881315	-3.09763	0.00195073	0.013349
ENSG00000143167	GPA33	0	1.24192	2.14885	1.02044	4.72798	7.34847	10.1243	4.41298	2.72909	0.926731	-2.94486	0.00323103	0.0194551
ENSG00000227545	AC006455.2	0	0	1.1363	4.18613	12.0616	11.1276	4.71921	13.845	2.72874	0.789323	-3.45706	0.000546103	0.00520336
ENSG00000279998	FP475955.3	2.24511	0	4.03972	9.0908	18.2335	48.5232	11.7561	18.51	2.72694	0.81387	-3.35059	0.000806403	0.00697263
ENSG00000213433	RPLP1P6	7.21662	3.87928	5.59807	5.03434	33.0744	56.1508	19.3512	18.4947	2.72627	0.551759	-4.94105	7.77028e-07	2.98802e-05
ENSG00000286795	AL161652.1	1.04639	2.32967	1.91052	6.82295	10.1474	43.0581	7.90291	56.463	2.72607	0.753317	-3.61876	0.000296021	0.0032929
ENSG00000092345	DAZL	66.1838	85.7966	573.093	368.663	1670.35	2518.73	1233.73	1103.6	2.72375	0.547829	-4.9719	6.62997e-07	2.62488e-05
ENSG00000187475	H1-6	74.1072	61.5748	441.079	452.131	1681.21	2454.61	960.316	1728.35	2.72219	0.64044	-4.2505	2.13296e-05	0.000439835
ENSG00000279711	AP004782.1	8.34819	12.4179	29.8451	16.3281	83.8306	200.177	49.9182	80.4691	2.72121	0.484111	-5.62104	1.89813e-08	1.45288e-06
ENSG00000261449	AC103724.3	4.97167	3.80721	5.50746	0	24.4358	32.6701	12.0642	17.7483	2.72083	0.652843	-4.16767	3.07735e-05	0.000586082
ENSG00000185156	MFSD6L	0	1.26463	3.28797	1.04181	8.98196	13.8228	5.58118	115.864	2.72052	0.77452	-3.51253	0.000443865	0.00446895
ENSG00000255293	WIZP1	0	1.29301	4.47568	3.11113	13.9318	20.7459	10.4616	8.00103	2.71986	0.692686	-3.92654	8.61777e-05	0.0013019
ENSG00000168619	ADAM18	1.45189	0	11.2154	6.37283	18.0299	61.6785	10.6194	79.7919	2.7198	0.701994	-3.87439	0.000106891	0.00153007
ENSG00000112246	SIM1	1.54234	0	6.84389	7.00112	29.0949	46.932	5.57033	20.3639	2.71867	0.905524	-3.00232	0.00267929	0.0169555
ENSG00000259075	POC1B-GALNT4	5.67221	0	0	17.4739	37.1387	70.1464	9.24145	21.869	2.71813	0.934717	-2.90797	0.00363782	0.0211902
ENSG00000213085	CFAP45	6.04108	21.0851	30.7285	7.0046	112.084	124.41	75.2091	184.867	2.71772	0.449094	-6.05155	1.4346e-09	1.62966e-07
ENSG00000227206	AL645937.2	1.16682	0	1.10566	3.06474	4.1404	14.7628	8.43167	12.338	2.71708	0.88797	-3.05988	0.00221423	0.0147255
ENSG00000248795	AC098859.1	0	1.28625	1.10932	4.09117	17.875	7.67799	7.52586	5.47761	2.71707	0.877155	-3.0976	0.00195095	0.013349
ENSG00000286459	AP006287.3	2.49744	0	17.6028	19.5013	91.1218	66.769	41.0631	43.9222	2.71647	0.63694	-4.26487	2.0002e-05	0.000420828
ENSG00000255313	AC100858.1	1.74424	0	4.86334	0	2.34589	22.9396	4.11563	62.6149	2.7155	0.915693	-2.96552	0.00302175	0.0185282
ENSG00000268100	ZNF725P	1.069	0	10.6653	3.97143	34.8227	32.2116	13.5041	25.4467	2.71447	0.731561	-3.71051	0.00020684	0.00250452
ENSG00000006611	USH1C	0	1.57658	13.2179	1.19573	43.2101	15.1592	26.4381	14.1776	2.70771	0.894775	-3.02614	0.00247697	0.0160092
ENSG00000287128	AL445238.2	0	1.17326	3.87489	3.96321	21.1469	21.3192	4.46072	15.285	2.70701	0.769742	-3.51678	0.000436821	0.00441324
ENSG00000270300	PHACTR2P1	3.70584	4.30778	7.36963	0.80921	25.3839	41.2961	9.54473	13.5417	2.70631	0.700835	-3.86155	0.000112669	0.00158827
ENSG00000164611	PTTG1	16.2433	16.3985	41.6155	40.3167	214.722	247.371	104.225	280.932	2.70356	0.390381	-6.92545	4.34599e-12	1.21491e-09
ENSG00000234068	PAGE2	7.56812	3.52346	56.8256	62.886	220.587	260.346	160.815	73.483	2.70306	0.682	-3.96343	7.388e-05	0.0011524
ENSG00000287722	AL356295.1	2.33879	0	0.917119	0.879905	3.65583	10.4578	3.21736	7.28797	2.70164	0.999658	-2.70257	0.00688066	0.0338381
ENSG00000207751	AP000553.1	2.46244	2.5743	4.39844	0	13.5608	12.8882	18.8294	9.05777	2.69985	0.805687	-3.35099	0.000805225	0.00696807
ENSG00000248347	AC120036.1	0	1.16006	10.3853	4.9294	21.5627	54.9163	7.11336	31.434	2.69929	0.788008	-3.42547	0.000613746	0.00566811
ENSG00000205777	GAGE1	0.835027	9.94935	31.7904	57.5376	146.788	233.39	96.559	58.9391	2.69854	0.821313	-3.28564	0.00101751	0.0082695
ENSG00000240280	TCAM1P	48.8071	35.4106	126.761	64.5248	431.963	649.296	250.51	449.876	2.69833	0.372062	-7.25238	4.09511e-13	1.70973e-10
ENSG00000226877	AL354733.1	3.7299	3.03194	15.7632	15.9868	60.6547	77.1313	50.4845	79.1106	2.6978	0.531466	-5.07615	3.85151e-07	1.69382e-05
ENSG00000187741	FANCA	74.9184	77.4848	377.714	205.261	1486.1	1347.85	745.717	643.697	2.69586	0.442726	-6.08923	1.13453e-09	1.34587e-07
ENSG00000278685	IQCA1L	2.36747	2.4376	2.10207	0	10.1339	3.18834	23.3626	54.9634	2.69576	0.880026	-3.06327	0.00218932	0.0145901
ENSG00000182791	CCDC87	8.54802	8.80625	29.445	19.4646	97.7221	173.552	54.2585	160.563	2.69533	0.478177	-5.63667	1.73374e-08	1.34954e-06
ENSG00000266306	AC061975.5	1.18702	6.26579	18.4515	13.1916	41.2392	108.075	43.5002	163.283	2.69427	0.550554	-4.89375	9.89307e-07	3.65566e-05
ENSG00000268318	LINC01872	0	1.64547	4.25672	3.11725	15.0078	23.0378	7.18689	33.6699	2.69312	0.706505	-3.81189	0.00013791	0.0018527
ENSG00000227148	AC069285.2	0	0	3.56521	0	3.53336	10.2507	2.85933	7.61464	2.69297	1.0539	-2.55523	0.0106117	0.0463133
ENSG00000230339	AC015818.1	0	0	7.44398	5.12144	30.9183	17.0984	13.2191	26.8937	2.6906	0.616509	-4.36425	1.27562e-05	0.000293759
ENSG00000166268	MYRFL	3.97221	1.0594	2.68145	0.88043	14.0254	19.1324	8.51851	17.4123	2.68924	0.818414	-3.28592	0.0010165	0.00826462
ENSG00000278916	CEP83-DT	2.23958	6.00722	21.0768	12.9975	72.8357	109.076	26.1247	96.0678	2.68639	0.534028	-5.03043	4.8937e-07	2.05651e-05
ENSG00000227543	SPAG5-AS1	9.53553	14.9652	36.5889	13.6169	107.387	190.485	61.4861	148.95	2.68551	0.429351	-6.2548	3.98037e-10	5.76787e-08
ENSG00000101890	GUCY2F	1.16373	0	1.04703	2.02718	9.3137	4.43441	7.33392	4.36688	2.68523	0.964294	-2.78465	0.00535847	0.0283143
ENSG00000112273	HDGFL1	26.7246	20.3894	208.382	153.743	693.945	849.042	432.821	915.989	2.68386	0.655349	-4.09532	4.21592e-05	0.000747976
ENSG00000151287	TEX30	52.9242	52.1641	180.982	102.096	587.2	859.494	421.394	483.743	2.67923	0.377789	-7.09188	1.32306e-12	4.62769e-10
ENSG00000226933	NRBF2P2	2.33736	0	6.3864	10.1945	37.0394	36.0274	21.2069	15.6615	2.67888	0.568437	-4.71271	2.44439e-06	7.68156e-05
ENSG00000224309	ANKRD30BP2	3.54914	5.7743	65.8398	12.5259	70.5049	247.475	111.66	226.066	2.67806	0.71462	-3.74752	0.000178589	0.00224531
ENSG00000203910	C1orf146	2.01235	3.34302	22.6062	8.4114	56.506	70.0519	50.4069	34.1872	2.6749	0.540956	-4.94476	7.62386e-07	2.94936e-05
ENSG00000006788	MYH13	3.64006	0	5.43695	8.25079	35.3132	32.9812	16.9375	10.0229	2.67392	0.608252	-4.39607	1.10229e-05	0.000259227
ENSG00000230565	ZNF32-AS2	4.67494	0	0	1.00534	8.15082	15.0204	3.67474	14.6663	2.6716	0.914597	-2.92107	0.00348833	0.0205465
ENSG00000196273	LINC00523	0.981503	2.05332	0.885706	0.615224	4.0617	18.088	1.5152	12.4162	2.67098	1.00479	-2.65824	0.00785495	0.0372669
ENSG00000285483	AL590381.1	0	0	4.18059	0.997364	7.36246	12.0843	7.08486	12.2937	2.669	0.788362	-3.3855	0.000710494	0.00634471
ENSG00000283599	BX276092.9	8.29511	8.45422	65.5987	43.9957	254.741	217.582	135.558	78.3028	2.66754	0.635867	-4.19511	2.72734e-05	0.00053618
ENSG00000283679	AC025278.3	0	0	20.0933	6.14941	38.2851	60.9122	27.278	79.4253	2.66747	0.727777	-3.66522	0.000247123	0.00285979
ENSG00000230796	AC064862.1	1.33432	1.47959	1.26261	0	8.20564	6.25643	3.53436	6.51982	2.66354	1.01675	-2.61967	0.00880159	0.0404277
ENSG00000064218	DMRT3	5.16527	3.15224	42.4662	26.2146	124.159	156.212	83.2588	68.6587	2.66353	0.683088	-3.89925	9.64928e-05	0.00141905
ENSG00000233756	DSCAM-IT1	2.61729	0	1.6077	2.94285	4.64278	16.0931	13.5633	5.18681	2.6629	0.963598	-2.7635	0.00571859	0.0296327
ENSG00000239344	AC090686.1	0	1.23508	3.10741	0.998458	9.59128	6.29912	10.0349	4.43084	2.66232	0.880003	-3.02535	0.00248343	0.0160284
ENSG00000231476	AC074389.2	0	1.25923	7.57485	12.7154	49.2608	38.7096	16.3195	26.4005	2.66148	0.763397	-3.48636	0.000489633	0.00479608
ENSG00000105146	AURKC	18.2817	15.1032	60.1755	43.3414	245.008	255.335	153.626	239.567	2.65955	0.383292	-6.9387	3.95733e-12	1.13589e-09
ENSG00000166126	AMN	4.14052	2.75715	10.8673	25.3859	57.1603	60.1334	58.6607	29.8167	2.65889	0.573797	-4.63386	3.58917e-06	0.000103022
ENSG00000251350	LINC02475	2.71911	2.80946	21.9126	2.94313	38.821	80.5718	28.7151	97.3875	2.65855	0.644312	-4.12618	3.68835e-05	0.000674477
ENSG00000188508	KRTDAP	3.19025	0	7.64116	0.919511	21.9424	26.6274	6.80171	13.6516	2.65621	0.825856	-3.21631	0.00129852	0.00989959
ENSG00000126259	KIRREL2	0	1.71403	7.76185	0.860332	20.5314	27.013	3.29663	9.00769	2.65611	0.937304	-2.83378	0.00460016	0.0251839
ENSG00000050438	SLC4A8	299.743	378.975	646.135	667.571	2862.41	4710.8	1831.36	2422.69	2.65445	0.309213	-8.58455	9.11907e-18	2.094e-14
ENSG00000176979	TRIM60	7.96159	2.93362	7.87698	7.07962	46.607	50.4888	21.3751	19.3047	2.65207	0.515031	-5.14934	2.614e-07	1.23763e-05
ENSG00000196074	SYCP2	74.8316	69.6064	432.826	218.506	1223.1	1730.36	803.537	1003.79	2.65158	0.506304	-5.23713	1.63094e-07	8.4567e-06
ENSG00000188386	PPP3R2	9.08959	9.79874	18.1313	0.815375	7.26388	167.005	5.1538	577.973	2.65092	1.00669	-2.63331	0.00845578	0.0393111
ENSG00000244219	TMEM225B	15.6184	18.4605	29.4955	16.0529	69.6537	248.138	59.054	403.144	2.64912	0.456896	-5.79808	6.70795e-09	6.07948e-07
ENSG00000235519	LINC01815	0	0	4.69098	3.40682	15.1021	17.0424	4.03719	19.4922	2.64758	0.771825	-3.43028	0.000602958	0.00560187
ENSG00000157060	SHCBP1L	37.618	32.7222	85.8315	36.151	210.932	551.633	165.486	651.201	2.64611	0.427096	-6.19557	5.80746e-10	7.97855e-08
ENSG00000259083	AL132639.3	0	1.35424	1.14413	1.0403	6.79967	6.68652	2.84283	6.20569	2.64015	1.03601	-2.54839	0.0108221	0.0469068
ENSG00000266826	IGBP1P2	3.61078	0	15.1514	15.3608	46.1719	76.5279	40.0625	52.8931	2.63787	0.591881	-4.45675	8.321e-06	0.000206566
ENSG00000164113	ADAD1	18.8397	7.92122	116.491	64.4311	316.702	448.743	203.071	624.178	2.63508	0.627979	-4.19612	2.71523e-05	0.000534532
ENSG00000254689	LINC02235	17.1774	21.6233	38.2762	17.3242	150.63	188.527	96.1138	105.45	2.6344	0.352497	-7.47353	7.80693e-14	4.27926e-11
ENSG00000198526	PABPC1P2	2.30317	0	5.1837	4.03374	13.9501	34.8008	7.27685	23.3827	2.63359	0.669357	-3.93451	8.3365e-05	0.0012665
ENSG00000217576	AL158066.1	21.7816	0	21.657	74.3344	170.155	251.228	128.762	100.145	2.63245	0.783168	-3.36129	0.000775807	0.00676632
ENSG00000279935	AL353611.2	1.18709	0	11.7375	3.04137	21.8872	35.286	19.1821	26.3875	2.6306	0.664354	-3.95963	7.50666e-05	0.00116807
ENSG00000270831	NF1P1	7.98367	0	0	22.1921	50.3795	74.7242	16.4022	25.0632	2.63013	1.02903	-2.55593	0.0105905	0.0462463
ENSG00000120054	CPN1	3.94139	1.00579	4.33493	8.61701	29.9988	33.2263	14.2645	13.0997	2.62839	0.646816	-4.06358	4.83252e-05	0.000829256
ENSG00000235592	AC004674.1	2.40111	0	14.2119	14.2507	57.4585	63.004	25.8011	22.716	2.62835	0.640645	-4.10267	4.08412e-05	0.000730641
ENSG00000284696	LINC02808	2.97906	3.27425	2.78688	4.38996	34.3476	12.5672	18.1092	63.4792	2.62817	0.559262	-4.69936	2.60981e-06	8.08846e-05
ENSG00000224960	PPP4R3C	3.22771	3.56337	32.2188	39.1708	136.988	150.414	78.0221	49.8084	2.6273	0.65254	-4.02627	5.66691e-05	0.000940041
ENSG00000203811	H3C14	35.8085	29.1589	164.368	50.8407	465.352	428.704	403.703	297.52	2.62312	0.499901	-5.24728	1.54365e-07	8.08361e-06
ENSG00000268651	CTAG1A	11.7605	0	63.3137	57.8437	242.285	209.959	163.301	74.1888	2.62223	0.836794	-3.13366	0.00172638	0.0121977
ENSG00000231528	FAM225A	58.9625	134.823	158.038	194.22	797.612	1242.91	482.345	1134.5	2.62165	0.518044	-5.06066	4.17803e-07	1.81507e-05
ENSG00000188152	NUTM2G	0	0	2.27874	1.04166	7.93129	4.83396	2.86045	17.4647	2.62121	1.03247	-2.53877	0.0111243	0.0479184
ENSG00000256151	ADGRD1-AS1	1.11877	1.57095	17.1956	9.82575	59.5127	55.3126	28.5006	26.731	2.62021	0.604206	-4.33663	1.44686e-05	0.00032459
ENSG00000123388	HOXC11	3.23228	1.04571	5.64778	1.3222	16.0055	17.1792	16.3054	8.0186	2.61854	0.733879	-3.56808	0.000359609	0.003812
ENSG00000218819	TDRD15	14.915	10.4754	103.973	95.6109	304.875	592.92	141.249	364.877	2.61836	0.666675	-3.9275	8.58342e-05	0.00129793
ENSG00000119547	ONECUT2	13.4752	11.3616	39.8985	33.6143	219.052	129.059	113.103	56.514	2.61748	0.432704	-6.04913	1.45632e-09	1.64564e-07
ENSG00000258732	AC025884.1	7.55654	4.12683	16.3567	11.2517	83.8695	71.3872	27.7261	30.2812	2.61637	0.529338	-4.94272	7.70404e-07	2.96966e-05
ENSG00000268916	CSAG3	0	0	14.512	8.70896	51.2994	36.8262	19.853	16.4337	2.61568	0.832209	-3.14306	0.0016719	0.0119282
ENSG00000286703	AC005682.2	5.42571	2.37427	3.94026	1.00317	16.3039	29.9854	12.58	14.5555	2.61468	0.669806	-3.90363	9.476e-05	0.00139677
ENSG00000197238	H4C11	8.23356	42.7433	127.264	82.7318	183.976	578.893	437.488	300.993	2.61357	0.764363	-3.41928	0.000627875	0.00577537
ENSG00000214819	CDRT15L2	1.67062	0	1.51296	1.85024	8.03793	10.8454	4.2745	28.6208	2.61254	1.00661	-2.59537	0.0094489	0.0425673
ENSG00000260593	AC009097.2	0	1.26831	3.40096	1.06066	4.13526	13.2033	9.17564	6.61365	2.60989	0.932701	-2.79821	0.00513873	0.0274236
ENSG00000233316	DSCR10	1.19723	0	3.25901	2.04252	8.32896	13.1992	9.27343	6.80385	2.60987	0.788695	-3.3091	0.000935976	0.00779932
ENSG00000261166	AC073429.2	4.19313	1.16204	23.4717	13.9063	27.9074	145.668	24.4048	29.221	2.60955	0.783479	-3.33072	0.000866222	0.00735145
ENSG00000256209	AC073578.1	0.889508	2.20226	11.643	5.99817	40.6656	33.1272	22.9702	21.4399	2.60751	0.557082	-4.68065	2.85965e-06	8.6421e-05
ENSG00000263887	AC053481.2	1.13795	0	3.08558	2.04297	3.50448	15.921	10.0908	6.14159	2.60711	0.946439	-2.75465	0.00587544	0.0302021
ENSG00000144962	SPATA16	0	0	4.37767	0	4.04116	15.4279	1.59565	252.908	2.60652	0.960048	-2.71499	0.00662787	0.0329401
ENSG00000274373	AC148476.1	3.73598	0	10.082	7.23694	40.8077	35.6147	21.7417	15.4503	2.60606	0.557603	-4.67368	2.95846e-06	8.86381e-05
ENSG00000205078	SYCE1L	24.5969	7.34516	12.2078	19.9179	105.354	144.441	38.1876	89.6552	2.60499	0.455303	-5.72145	1.05619e-08	8.91196e-07
ENSG00000259783	LINC02259	0	1.12645	9.38444	0.886342	13.8596	27.6328	5.55591	33.0086	2.60439	0.726979	-3.58249	0.000340339	0.00366765
ENSG00000128578	STRIP2	177.068	166.113	424.522	198.829	1785.09	1770.98	845.437	815.897	2.60382	0.320925	-8.11348	4.91915e-16	5.45314e-13
ENSG00000197921	HES5	0	0	6.89752	3.26692	25.4497	12.7114	8.64514	8.18371	2.60366	0.808433	-3.22062	0.00127913	0.00978151
ENSG00000233183	AL138889.1	242.887	221.264	528.787	204.661	1965.15	2638.11	850.07	2538.12	2.60365	0.406961	-6.39779	1.57642e-10	2.61231e-08
ENSG00000258969	LINC02307	0.946171	1.01115	2.5818	0	6.70616	10.5432	4.15814	5.0394	2.60331	0.939648	-2.77052	0.00559669	0.0291703
ENSG00000235989	MORC2-AS1	4.89122	12.953	34.2019	22.6965	73.2693	206.165	59.3686	409.674	2.60266	0.576444	-4.51503	6.3307e-06	0.000165194
ENSG00000152670	DDX4	101.083	38.6441	645.853	597.677	2130.63	2819.88	1346.81	1645.18	2.60163	0.841414	-3.09197	0.0019883	0.0135395
ENSG00000151725	CENPU	45.6273	29.8	168.741	102.132	540.829	772.1	273.578	587.39	2.6011	0.464288	-5.60235	2.11463e-08	1.5958e-06
ENSG00000286999	AL121581.3	1.23984	2.55315	3.29033	1.02406	22.151	9.75437	4.66751	5.79063	2.60018	0.830405	-3.13122	0.00174082	0.0122755
ENSG00000260482	AC008870.1	0	3.56423	15.1121	8.94608	43.0032	43.0958	40.985	21.0052	2.5998	0.919962	-2.82599	0.00471346	0.025648
ENSG00000153132	CLGN	39.4807	29.3939	74.3396	25.125	150.708	523.236	93.8272	793.903	2.59956	0.499819	-5.20101	1.98213e-07	9.89466e-06
ENSG00000241149	ZNF722P	1.07972	4.77019	10.7979	10.0152	40.307	50.0239	33.4171	26.0296	2.59896	0.486445	-5.34276	9.15399e-08	5.23634e-06
ENSG00000179148	ALOXE3	0	0	24.1658	2.04844	31.9608	56.8238	19.3875	19.9716	2.59831	0.981059	-2.64848	0.00808553	0.0380855
ENSG00000164556	FAM183BP	2.45649	1.27728	2.19942	2.0696	12.0949	21.6833	2.80293	60.3327	2.59781	0.920238	-2.82298	0.004758	0.0258422
ENSG00000131153	GINS2	23.8956	27.6126	73.4184	33.3501	254.142	312.097	159.193	133.328	2.59719	0.364703	-7.12138	1.06854e-12	3.85972e-10
ENSG00000134760	DSG1	2.22905	2.37153	1.73359	1.20052	15.6725	11.8428	3.76231	45.7422	2.59689	0.724653	-3.58363	0.000338852	0.00365306
ENSG00000287392	AC097520.2	0	0	6.12993	2.99133	21.1962	14.8623	8.15516	12.5216	2.59489	0.695911	-3.72877	0.000192418	0.00236512
ENSG00000213232	PPP1R2P10	0	2.56856	9.68563	10.1326	32.0221	56.0333	15.8928	24.5636	2.59386	0.663229	-3.91095	9.1933e-05	0.00136827
ENSG00000276410	H2BC3	33.0675	33.6924	116.102	72.4797	279.717	467.001	411.82	272.37	2.59267	0.489805	-5.29328	1.20144e-07	6.57987e-06
ENSG00000166920	C15orf48	5.99796	7.12744	21.5461	28.335	72.9365	143.286	78.5173	188.77	2.59089	0.412501	-6.28092	3.36571e-10	5.05612e-08
ENSG00000232706	NUTM2HP	2.49353	5.12058	3.30816	0	14.7555	19.3113	14.1116	17.8312	2.59023	0.909353	-2.84843	0.00439357	0.024406
ENSG00000243981	AC064862.6	1.70024	0.972267	7.24698	6.99985	17.3693	55.7631	4.35292	37.6766	2.58964	0.777101	-3.33244	0.000860885	0.00731968
ENSG00000054796	SPO11	2.13859	3.71574	43.3947	27.8002	103.227	179.854	68.4768	65.9866	2.58947	0.713256	-3.6305	0.000282878	0.00318416
ENSG00000276210	LINC00226	0	0	4.64599	3.36974	12.5282	21.2986	4.34347	36.0146	2.58931	0.985307	-2.62793	0.00859069	0.0397658
ENSG00000162728	KCNJ9	1.22577	2.51213	7.63129	0	19.5724	15.9157	15.9039	11.022	2.5889	0.672191	-3.85143	0.000117428	0.00163995
ENSG00000273388	AC005291.2	1.23425	0	2.30104	2.07546	12.6799	9.36633	3.79657	5.49459	2.58818	0.870677	-2.97261	0.00295284	0.0182203
ENSG00000184661	CDCA2	39.082	27.6118	204.5	175.43	796.045	846.818	371.775	506.274	2.58653	0.537336	-4.81362	1.48217e-06	5.09069e-05
ENSG00000287980	AL391557.1	0	2.43253	4.0995	2.9965	17.1372	22.7374	4.51753	17.0353	2.58365	0.70806	-3.64891	0.000263352	0.00300755
ENSG00000255101	AC103843.1	1.20313	1.28839	12.1469	3.0254	27.9407	28.829	24.3929	17.3868	2.58076	0.550054	-4.69182	2.7078e-06	8.29841e-05
ENSG00000002726	AOC1	10.348	6.64988	6.15498	8.10463	24.3447	60.3495	53.8694	28.4999	2.58037	0.61522	-4.19422	2.73806e-05	0.000537711
ENSG00000092850	TEKT2	6.49976	5.27395	12.7368	4.54646	54.0643	51.8748	24.5612	244.181	2.57867	0.611774	-4.21506	2.49709e-05	0.000501415
ENSG00000254840	AC024405.2	0.783701	12.4402	18.2235	21.4883	78.3641	105.324	39.3303	80.481	2.57694	0.711133	-3.62372	0.000290398	0.00325059
ENSG00000124116	WFDC3	6.68651	9.1665	19.1041	13.677	64.9894	123.632	31.3252	178.391	2.57673	0.461065	-5.58866	2.28831e-08	1.70684e-06
ENSG00000271926	AC008972.1	0	0	2.87992	1.89624	3.58249	11.8106	7.7493	5.64566	2.57543	0.920691	-2.79728	0.00515352	0.0274752
ENSG00000234008	PPP1R2P2	0	0	5.33647	2.04855	8.7143	17.2033	8.44705	14.9992	2.57425	0.807667	-3.18727	0.00143623	0.0106682
ENSG00000268170	AC073342.1	3.13447	5.7518	11.4357	2.91245	33.5888	45.6531	26.0907	24.2024	2.57334	0.484892	-5.30703	1.11428e-07	6.17621e-06
ENSG00000244501	RN7SL623P	1.23663	0	3.48327	2.05265	6.67151	12.9446	11.2219	5.97582	2.57313	0.793763	-3.24169	0.00118823	0.00925589
ENSG00000236313	VN1R53P	0	1.21561	9.1044	0.996799	14.1367	27.2834	11.5938	32.6786	2.57183	0.664622	-3.86962	0.000109005	0.00155023
ENSG00000079393	DUSP13	2.19216	0	0	3.1091	7.02354	9.25849	10.3568	73.3458	2.57142	0.971813	-2.646	0.00814491	0.0382711
ENSG00000126787	DLGAP5	11.0864	14.1184	91.5286	66.7111	311.82	381.772	131.104	235.249	2.57009	0.573293	-4.48303	7.35915e-06	0.000187466
ENSG00000267733	AP005264.4	15.6464	20.0954	37.2183	14.0129	106.227	218.93	61.4305	134.016	2.56728	0.423249	-6.06566	1.31413e-09	1.50343e-07
ENSG00000178836	AC114812.1	0	2.3346	14.0601	11.2906	49.9169	51.7979	23.4688	80.3783	2.56634	0.649082	-3.95379	7.69219e-05	0.00118889
ENSG00000145491	ROPN1L	11.7345	3.25917	35.9056	9.26436	72.4924	161.27	29.3258	714.391	2.56395	0.606971	-4.22417	2.39824e-05	0.000486426
ENSG00000047597	XK	25.5971	18.5372	49.1939	31.546	149.025	290.308	118.671	77.9639	2.5632	0.374973	-6.8357	8.1603e-12	2.01798e-09
ENSG00000166866	MYO1A	20.1046	5.41991	40.5028	39.6577	176.992	185.012	101.742	127.75	2.56317	0.544266	-4.70941	2.4844e-06	7.77688e-05
ENSG00000183034	OTOP2	0	1.76632	3.0755	1.53759	13.3576	8.76367	4.28137	17.912	2.55835	0.816481	-3.13338	0.00172805	0.0122069
ENSG00000215317	THUMPD1P1	1.16285	0	2.11322	1.02452	6.45887	8.47912	4.62744	3.55841	2.55785	1.01554	-2.5187	0.0117788	0.0499624
ENSG00000277352	AP001065.4	1.19085	0	2.17217	3.02322	4.56378	13.9849	11.0228	18.9998	2.5554	0.7556	-3.38195	0.000719731	0.00641294
ENSG00000177602	HASPIN	11.0073	5.02092	36.9799	35.4859	122.234	195.962	75.6994	152.349	2.5553	0.54896	-4.6548	3.24289e-06	9.59084e-05
ENSG00000226072	AC016772.1	0	2.30276	0.933993	1.9535	12.6056	7.72346	3.49515	5.88059	2.55471	0.912813	-2.79872	0.00513056	0.0274012
ENSG00000115297	TLX2	3.63893	0	9.4971	7.00844	32.0367	41.3228	17.9	18.0921	2.55398	0.613618	-4.16217	3.15236e-05	0.000597889
ENSG00000241728	AP001062.3	2.40526	2.50674	5.04629	8.94985	28.991	41.2827	15.5161	15.2283	2.55203	0.559167	-4.56398	5.01924e-06	0.000135595
ENSG00000255441	SIGLEC10-AS1	1.39798	0	5.79859	8.53513	21.2617	27.064	24.4126	15.4242	2.5517	0.551684	-4.62529	3.74073e-06	0.000106611
ENSG00000165059	PRKACG	0	0	8.8165	1.02736	20.7651	14.8474	8.45024	72.5221	2.55086	0.778669	-3.27592	0.00105317	0.00847279
ENSG00000141433	ADCYAP1	15.7927	109.282	15.9672	16.1511	259.786	313.658	117.799	72.3095	2.55071	0.735539	-3.46782	0.000524706	0.00505278
ENSG00000180116	C12orf40	18.0724	21.4022	57.9584	50.8603	196.123	334.884	120.679	163.254	2.5499	0.41976	-6.07467	1.24244e-09	1.43997e-07
ENSG00000101812	H2BW2	25.0493	14.8691	14.2787	16.4236	63.0263	142.675	104.52	29.5717	2.54937	0.614425	-4.14919	3.33652e-05	0.000624344
ENSG00000184029	DSCR4	1.93114	0	5.27109	9.18617	31.3243	34.6068	8.27989	14.6408	2.54903	0.715575	-3.56221	0.000367748	0.00387491
ENSG00000181418	DDN	6.34068	1.27132	2.23829	1.06463	14.7232	17.7377	14.2667	7.75859	2.54894	0.635515	-4.01082	6.05077e-05	0.000985911
ENSG00000154479	CCDC173	17.1665	11.4014	25.5375	21.4817	88.8999	211.997	37.2615	248.233	2.5469	0.609578	-4.17814	2.93906e-05	0.000564615
ENSG00000118193	KIF14	32.1578	22.5794	138.132	92.4928	440.546	601.322	212.406	236.799	2.54585	0.505013	-5.04115	4.62731e-07	1.97818e-05
ENSG00000234183	LINC01952	1.04498	1.16012	3.92841	0.860742	7.43171	17.4028	6.31746	8.64913	2.54258	0.734117	-3.46346	0.000533286	0.00511153
ENSG00000143228	NUF2	22.1637	5.86908	60.1318	38.3624	139.224	278.741	132.119	245.988	2.54093	0.509958	-4.98262	6.27292e-07	2.50823e-05
ENSG00000214614	AC142086.1	0	0	13.4153	10.0051	57.4741	26.0709	20.0505	38.8932	2.53918	0.858075	-2.95915	0.00308486	0.0188004
ENSG00000204279	PAGE3	0	0	7.33146	4.84117	20.0866	18.969	14.72	10.9307	2.53686	0.715427	-3.54594	0.00039122	0.0040597
ENSG00000141371	C17orf64	11.4784	4.13286	22.8593	0	30.4851	91.3761	41.5166	165.945	2.53422	0.711599	-3.5613	0.00036902	0.00388196
ENSG00000170312	CDK1	12.7425	5.21946	53.4475	39.6501	120.178	266.409	94.0855	137.395	2.52935	0.580704	-4.35567	1.32663e-05	0.000303116
ENSG00000175063	UBE2C	2.41695	2.5486	21.9605	20.4142	78.3901	96.8501	32.955	46.0896	2.52919	0.628263	-4.02568	5.68109e-05	0.000941421
ENSG00000258927	AL133467.2	0	2.09916	11.1452	7.41117	30.6053	40.4805	18.6089	17.482	2.52718	0.629359	-4.01548	5.93248e-05	0.000972199
ENSG00000288568	AC092720.3	7.59124	5.39788	29.4633	23.645	153.743	89.1491	52.2818	98.1248	2.52685	0.477439	-5.2925	1.20658e-07	6.59677e-06
ENSG00000270607	AC009549.1	1.14863	0	1.03716	5.02854	9.41977	16.3776	7.28495	12.7634	2.5248	0.725935	-3.478	0.000505167	0.00491618
ENSG00000278522	POTEB3	42.9036	35.7095	256.595	51.8908	239.601	1309.76	122.575	1240	2.52433	0.700095	-3.6057	0.000311317	0.0034263
ENSG00000248710	AC079594.1	2.13202	2.33931	8.71884	10.927	17.1838	60.4772	27.8969	32.3621	2.52426	0.706843	-3.57118	0.000355381	0.00377939
ENSG00000274698	AC099521.1	3.36225	2.40632	8.14095	10.0131	39.9773	46.5144	19.8113	27.868	2.52405	0.498962	-5.05859	4.22369e-07	1.82996e-05
ENSG00000085999	RAD54L	61.7275	26.9536	185.787	60.1563	497.889	542.504	413.047	309.346	2.52218	0.42334	-5.95782	2.55627e-09	2.62552e-07
ENSG00000232724	TRIM80P	0	1.27011	5.52358	0	10.6559	9.25737	9.3945	4.86199	2.52202	0.858166	-2.93885	0.00329429	0.0197252
ENSG00000272736	AC005323.2	0	1.54243	7.52433	0	8.17353	23.3273	8.56992	10.0133	2.52178	0.857883	-2.93953	0.00328705	0.0196966
ENSG00000106013	ANKRD7	56.8124	51.1173	214.764	114.997	440.036	1062.53	390.944	2105.38	2.52085	0.438045	-5.75479	8.67521e-09	7.55801e-07
ENSG00000161800	RACGAP1	84.1374	65.5083	201.096	174.726	809.802	1056.76	395.562	634.136	2.52013	0.400427	-6.29361	3.1017e-10	4.68139e-08
ENSG00000144821	MYH15	5.40696	1.92281	22.7654	39.1105	124.187	127.551	46.9099	63.4598	2.51976	0.672005	-3.74962	0.000177102	0.00223099
ENSG00000286807	AC093639.2	6.16443	0	12.1051	1.94131	34.1878	39.6	16.4915	13.2638	2.51855	0.637043	-3.9535	7.70162e-05	0.0011892
ENSG00000224209	LINC00466	15.3253	11.7151	42.4348	6.07917	75.7323	160.128	90.7161	144.269	2.51813	0.483402	-5.20919	1.89671e-07	9.54234e-06
ENSG00000262904	TMPOP2	1.14472	0	7.22982	5.07223	13.3766	36.1512	10.1258	24.1177	2.51714	0.786855	-3.19899	0.0013791	0.0103794
ENSG00000160188	RSPH1	18.88	19.4355	29.1767	17.6984	116.195	172.08	80.3757	189.258	2.51696	0.340514	-7.39167	1.44995e-13	6.95717e-11
ENSG00000140955	ADAD2	33.8067	28.1972	147.113	162.672	559.653	732.451	322.142	583.58	2.51695	0.493283	-5.10245	3.35288e-07	1.50543e-05
ENSG00000283408	MIR548A1HG	2.41752	0	12.9216	8.75615	38.0506	56.243	21.7162	50.7081	2.51646	0.526291	-4.7815	1.73995e-06	5.83272e-05
ENSG00000196844	PATE2	15.9381	1.15844	2.92706	5.76955	22.8019	62.1373	14.7024	16.3039	2.5163	0.656774	-3.8313	0.000127466	0.00174405
ENSG00000137948	BRDT	58.1037	71.2657	138.323	85.533	434.045	823.937	295.632	887.299	2.51606	0.362799	-6.93514	4.05818e-12	1.15453e-09
ENSG00000129173	E2F8	0.952489	1.01646	17.8521	3.31683	11.6691	28.6495	29.0248	30.7473	2.51521	0.684033	-3.67703	0.000235968	0.00275826
ENSG00000224458	GUSBP6	1.4594	3.70344	19.0444	14.1547	84.2406	57.8641	21.8776	28.1556	2.51463	0.674395	-3.72872	0.000192458	0.00236512
ENSG00000177807	KCNJ10	3.29086	0.784845	4.61835	4.09996	20.3648	19.8815	11.4419	7.76735	2.51239	0.677747	-3.70697	0.000209751	0.00253007
ENSG00000174225	ARL13A	0	0	7.3161	3.8048	19.509	9.57584	10.3759	17.7015	2.51136	0.710838	-3.53296	0.000410934	0.00421314
ENSG00000101222	SPEF1	3.34863	2.77973	7.77509	7.94041	19.1822	58.1916	18.6369	58.3667	2.51062	0.527352	-4.7608	1.92824e-06	6.32541e-05
ENSG00000137766	UNC13C	13.979	13.7869	49.9217	18.838	191.961	158.384	57.6821	129.559	2.51027	0.498706	-5.03358	4.81412e-07	2.0329e-05
ENSG00000181378	CFAP65	8.65788	1.13689	50.631	42.8562	106.478	259.387	69.526	251.787	2.50919	0.765789	-3.2766	0.00105064	0.00846147
ENSG00000251574	AC099520.1	3.1083	1.51514	9.33036	7.14651	20.1696	47.8729	17.2722	32.0392	2.50725	0.584959	-4.2862	1.81752e-05	0.000390903
ENSG00000213420	GPC2	28.0818	51.34	78.4481	58.5089	370.072	341.014	213.307	168.204	2.50595	0.282138	-8.882	6.56707e-19	3.01598e-15
ENSG00000166451	CENPN	27.2199	46.7092	65.5047	39.2253	452.156	231.768	80.1764	129.261	2.50535	0.454173	-5.51629	3.46228e-08	2.39366e-06
ENSG00000172361	CFAP53	19.483	19.6607	65.2846	36.448	121.33	406.629	73.0277	349.624	2.50271	0.585364	-4.27548	1.90728e-05	0.000404988
ENSG00000256249	AC026333.3	0	0.74033	2.91702	3.45469	9.38202	15.4477	3.65473	5.13813	2.50228	0.927473	-2.69795	0.00697671	0.0341291
ENSG00000105278	ZFR2	18.7231	30.384	132.56	77.653	435.293	442.581	214.626	271.125	2.50178	0.537273	-4.65645	3.21708e-06	9.53205e-05
ENSG00000236409	NRADDP	1.9709	1.04076	5.22659	1.69112	7.02991	26.9801	5.7413	8.2142	2.50048	0.808202	-3.09388	0.00197556	0.0134751
ENSG00000279516	FAM230C	1.76953	0.9241	21.3098	11.504	41.1464	70.905	35.0062	63.6558	2.50045	0.808106	-3.09421	0.00197335	0.0134719
ENSG00000259031	AL845552.2	1.35342	2.67226	3.56943	0	16.1348	7.04973	7.80906	4.63256	2.49904	0.854291	-2.92528	0.00344151	0.0203528
ENSG00000283039	KLF18	0	1.26267	4.34573	1.03028	7.3804	13.8739	7.43215	4.68248	2.49898	0.856469	-2.91777	0.0035254	0.0207
ENSG00000101447	FAM83D	16.7014	14.86	95.5492	66.9024	294.192	353.601	178.236	125.512	2.49816	0.537511	-4.64765	3.35734e-06	9.84303e-05
ENSG00000078487	ZCWPW1	156.47	152.45	411.702	207.205	1372.38	1569.95	1001.79	763.913	2.49767	0.300425	-8.31379	9.26948e-17	1.35452e-13
ENSG00000160963	COL26A1	3.06253	7.58687	11.6606	17.6122	102.795	33.7409	38.8786	24.0293	2.49742	0.650246	-3.84073	0.000122669	0.00169688
ENSG00000165325	DEUP1	25.0833	2.1939	36.1554	10.715	100.012	147.513	62.9563	160.549	2.49627	0.596207	-4.18693	2.82754e-05	0.000548912
ENSG00000203496	AL133216.1	1.1813	2.53321	5.36585	0	18.1926	8.93021	11.1445	7.32574	2.49534	0.904173	-2.7598	0.00578366	0.0298688
ENSG00000244009	B3GAT3P1	1.25718	0	4.43657	2.02437	13.4154	13.3862	6.58	5.99471	2.49271	0.792517	-3.14531	0.0016591	0.0118711
ENSG00000188375	H3-5	1.15126	0	3.11158	1.0163	3.09954	18.4786	1.82836	72.8698	2.49017	0.90824	-2.74176	0.00611118	0.031071
ENSG00000238269	PAGE2B	17.85	10.3507	110.549	115.348	358.905	452.631	261.484	138.021	2.48867	0.641552	-3.87914	0.000104825	0.00150509
ENSG00000075218	GTSE1	28.2941	29.8026	71.6764	68.0617	307.698	393.098	146.961	198.806	2.48825	0.372382	-6.68199	2.35719e-11	5.01847e-09
ENSG00000024526	DEPDC1	49.3527	30.5363	75.0069	57.4639	279.803	468.532	160.585	254.799	2.4871	0.346949	-7.16847	7.5839e-13	2.83497e-10
ENSG00000164142	FAM160A1	81.7727	46.583	202.025	311.048	1326.04	985.404	384.543	495.033	2.48706	0.542841	-4.58156	4.61515e-06	0.000126056
ENSG00000180138	CSNK1A1L	2.27617	0	5.12048	11.0888	16.2765	39.0061	24.6056	33.296	2.48643	0.722397	-3.44192	0.00057761	0.00542204
ENSG00000002079	MYH16	3.53593	2.92582	9.48507	8.32802	44.8871	47.7399	14.1809	33.4287	2.48592	0.60576	-4.1038	4.06421e-05	0.000728296
ENSG00000230411	OR3D1P	4.44188	0	7.0986	0	8.67475	28.7365	12.4565	16.7913	2.48262	0.695994	-3.56701	0.000361071	0.0038251
ENSG00000223731	SUPT20HL1	13.2705	13.7941	23.6751	15.2277	118.012	111.117	48.8531	34.5047	2.48223	0.405034	-6.12844	8.87428e-10	1.09128e-07
ENSG00000215572	ESRRAP1	3.91121	1.29713	14.6947	5.18513	55.9398	35.4174	15.2913	33.7893	2.48139	0.585305	-4.23948	2.24039e-05	0.000458298
ENSG00000277893	SRD5A2	2.19996	1.18515	10.9151	1.98539	29.7815	18.5708	21.3815	23.442	2.48013	0.675529	-3.67139	0.000241234	0.00280985
ENSG00000137812	KNL1	267.692	221.022	1121.71	1070	4334.01	4474.1	2401.32	2441.34	2.47926	0.477777	-5.18915	2.11251e-07	1.03839e-05
ENSG00000151475	SLC25A31	9.77734	2.37236	70.8636	75.0041	218.639	308.377	136.335	271.214	2.47893	0.740123	-3.34934	0.000810032	0.00699273
ENSG00000224540	TFDP1P1	2.42195	1.26279	1.09375	1.02244	5.56242	15.7408	2.78199	40.4166	2.47778	0.81014	-3.05845	0.00222484	0.0147761
ENSG00000100526	CDKN3	4.99007	4.68854	12.3682	3.13665	31.9881	54.8937	19.0119	285.729	2.47704	0.581538	-4.25947	2.04914e-05	0.00042832
ENSG00000213885	RPL13AP7	0	2.33234	4.21592	0	4.01503	16.4521	5.80804	8.28171	2.47688	0.937577	-2.64179	0.00824683	0.0385808
ENSG00000213962	API5P2	0	0	5.91942	1.9886	10.9739	18.6908	5.39487	4.65734	2.47679	0.92499	-2.67764	0.00741439	0.0356757
ENSG00000229214	LINC00242	2.26229	2.33721	1.18494	2.85836	17.4749	9.41944	9.62272	7.27915	2.47358	0.752037	-3.28917	0.00100483	0.0081926
ENSG00000162398	LEXM	0	1.20427	7.88584	0	10.0498	17.5955	10.0916	26.7669	2.47279	0.790054	-3.12991	0.00174863	0.0123152
ENSG00000197309	OR10D3	2.68677	1.945	13.1943	22.1341	53.5709	77.6654	36.6483	27.5531	2.47219	0.656896	-3.76343	0.000167596	0.00214486
ENSG00000251611	FAM160A1-DT	1.24568	1.35182	2.3101	5.15985	17.6028	15.8354	10.1943	7.92645	2.47033	0.675547	-3.65678	0.0002554	0.0029376
ENSG00000198788	MUC2	2.23235	2.82768	13.6646	5.58784	46.6561	37.6213	15.5811	21.6009	2.46975	0.656626	-3.76128	0.000169049	0.00215744
ENSG00000213645	SLC25A1P3	0	1.34629	3.48497	1.06156	4.94779	14.6782	4.8348	8.85632	2.46699	0.897753	-2.74796	0.00599669	0.0306343
ENSG00000251199	AC015631.1	8.37434	6.87838	22.7743	9.32036	53.9671	104.482	40.6845	38.3869	2.46559	0.454183	-5.42862	5.67905e-08	3.5939e-06
ENSG00000197446	CYP2F1	9.18297	1.36453	17.6937	5.18782	71.9818	49.1142	17.9829	22.251	2.46405	0.662912	-3.71701	0.000201591	0.00245482
ENSG00000214617	SLC6A10P	24.8224	52.9378	355.612	287.245	1446.76	931.675	600.811	573.566	2.46376	0.662942	-3.7164	0.000202082	0.00245894
ENSG00000215817	ZC3H11B	5.42855	4.68385	13.7242	13.6488	41.0327	92.641	24.4144	137.557	2.46339	0.502125	-4.90592	9.29887e-07	3.47201e-05
ENSG00000286844	AC068688.1	4.27608	3.51369	39.9638	17.6653	58.3005	181.216	32.94	32.352	2.46239	0.783844	-3.14142	0.00168128	0.0119685
ENSG00000286785	LINC01622	2.09892	6.02646	18.6138	7.65285	54.4837	61.3778	26.3046	76.8078	2.45986	0.647125	-3.80121	0.000143994	0.00191444
ENSG00000198414	TATDN2P1	10.5131	2.47095	42.0573	56.9317	194.73	150.474	119.928	64.6683	2.45936	0.638393	-3.85243	0.000116953	0.00163539
ENSG00000245694	CRNDE	61.8962	29.2542	157.793	151.33	476.269	735.92	433.606	697.857	2.45915	0.422251	-5.82391	5.74868e-09	5.34128e-07
ENSG00000147082	CCNB3	15.3919	53.4416	132.302	95.2148	369.965	578.811	279.761	188.283	2.45888	0.489781	-5.02036	5.15738e-07	2.15045e-05
ENSG00000152292	SH2D6	7.15083	4.89851	55.8344	10.3796	89.4443	144.405	65.5862	56.6962	2.45872	0.602004	-4.08422	4.42242e-05	0.000773514
ENSG00000230445	LRRC37A6P	2.72347	21.9367	27.2394	20.58	73.9259	181.79	41.5586	127.512	2.45867	0.570146	-4.31235	1.61531e-05	0.000355583
ENSG00000237649	KIFC1	10.1508	31.4048	99.5771	68.1826	293.095	384.843	185.576	189.923	2.45835	0.550313	-4.46718	7.92565e-06	0.000199213
ENSG00000142619	PADI3	2.39605	0	7.52343	2.0358	20.2686	21.5794	8.26554	6.60761	2.45342	0.7723	-3.17677	0.00148923	0.0109606
ENSG00000129654	FOXJ1	7.81211	8.93583	26.22	17.1926	77.3345	107.55	65.455	150.652	2.45314	0.413763	-5.92886	3.05049e-09	3.06394e-07
ENSG00000238235	TSPY11P	0	0	6.56249	8.222	31.9033	16.8722	13.1791	7.75682	2.45226	0.952522	-2.5745	0.0100386	0.0445562
ENSG00000181333	HEPHL1	1.11645	1.20179	8.08254	3.03276	16.2316	27.8651	12.748	11.0305	2.45072	0.680514	-3.60128	0.00031665	0.00346364
ENSG00000121621	KIF18A	18.9131	19.9895	125.08	94.5164	381.447	427.311	249.056	258.702	2.44901	0.519955	-4.71005	2.47658e-06	7.76751e-05
ENSG00000204379	XAGE1A	21.4879	6.45717	138.489	111.736	345.011	545.809	247.473	147.517	2.44673	0.735849	-3.32505	0.00088403	0.00746318
ENSG00000273419	AC004877.1	2.41385	3.75292	6.46595	5.13241	33.0724	21.9362	18.4971	10.3723	2.44613	0.590072	-4.14549	3.39091e-05	0.000631948
ENSG00000268530	AC008403.2	0.927739	2.1253	7.12761	8.41898	28.7805	37.5422	11.8784	31.1327	2.44439	0.64363	-3.79782	0.000145976	0.00193599
ENSG00000181773	GPR3	1.2109	1.24535	3.22962	1.02402	10.4688	10.6884	6.48542	3.60757	2.44135	0.870297	-2.80519	0.00502871	0.0269708
ENSG00000260903	XKR7	0	2.51161	3.2584	6.21011	22.4663	14.6013	13.0606	14.1477	2.44086	0.610138	-4.0005	6.32097e-05	0.00102165
ENSG00000163012	ZSWIM2	0	0	14.4524	6.30893	22.3262	47.9993	20.9637	63.1579	2.4405	0.694585	-3.51361	0.000442055	0.00445888
ENSG00000260254	AP000997.3	0	0	5.14442	4.01977	15.6005	16.6947	7.2482	6.4851	2.44007	0.758757	-3.21587	0.00130048	0.00990268
ENSG00000188280	FAM230G	0.711541	0	13.9272	7.41107	27.7214	22.2146	33.9643	84.5353	2.4387	0.785066	-3.10636	0.00189406	0.0130599
ENSG00000132016	C19orf57	51.3644	37.9142	100.077	107.897	511.614	440.147	259.763	223.243	2.43714	0.337094	-7.22985	4.83538e-13	1.9431e-10
ENSG00000106462	EZH2	67.9852	48.2161	242.552	204.07	679.202	1015.7	595.398	534.606	2.43657	0.435179	-5.59899	2.15598e-08	1.61821e-06
ENSG00000226553	IMPDH1P7	0	3.87059	3.33594	2.07367	10.8882	17.1117	9.35399	6.41981	2.43353	0.726231	-3.3509	0.000805491	0.0069685
ENSG00000132958	TPTE2	12.0743	14.8723	38.663	29.5074	121.166	192.198	76.2819	122.753	2.43259	0.388259	-6.26538	3.71911e-10	5.45946e-08
ENSG00000124635	H2BC11	79.1724	84.176	214.463	154.254	641.992	903.415	609.158	543.046	2.4312	0.360825	-6.73788	1.60709e-11	3.61293e-09
ENSG00000238098	ABCA17P	29.6547	10.0707	42.2581	25.0285	148.123	176.648	116.97	205.321	2.43113	0.442008	-5.50021	3.79344e-08	2.59471e-06
ENSG00000100162	CENPM	6.83062	23.8136	20.4129	17.0696	114	106.793	56.6177	56.6281	2.42962	0.389267	-6.24152	4.33338e-10	6.12527e-08
ENSG00000223631	LINC01120	15.2573	11.3763	51.9162	44.2553	159.533	241.124	105.158	197.582	2.42908	0.451339	-5.38193	7.36922e-08	4.43643e-06
ENSG00000222042	AP001341.1	0	0	9.85516	5.13612	26.2563	27.6515	8.30793	17.5522	2.42791	0.729096	-3.33003	0.000868367	0.00736383
ENSG00000236253	SLC25A3P1	1.82493	0	14.6281	13.6643	44.956	62.6256	16.3264	69.7472	2.4276	0.760282	-3.19303	0.0014079	0.0105333
ENSG00000213231	TCL1B	0.85915	0	8.98538	8.64324	38.5101	17.4671	17.682	11.9503	2.42576	0.850079	-2.85357	0.00432313	0.0241201
ENSG00000143476	DTL	60.9344	34.6273	201.36	183.16	710.778	941.753	289.405	436.714	2.42559	0.507799	-4.77668	1.78215e-06	5.94322e-05
ENSG00000187581	COX8C	5.87314	1.25323	39.5159	10.2048	84.1474	84.354	62.774	81.8983	2.42406	0.622187	-3.89603	9.77833e-05	0.00143279
ENSG00000111665	CDCA3	16.0987	27.0654	66.6655	27.5506	183.079	278.296	86.001	208.231	2.42142	0.449394	-5.38819	7.11692e-08	4.30876e-06
ENSG00000272514	CFAP206	12.1312	0	50.913	28.2104	124.609	165.505	77.4869	442.543	2.41934	0.950859	-2.54437	0.0109475	0.0473228
ENSG00000143194	MAEL	55.9898	56.1431	276.468	254.128	867.8	1224.43	490.397	869.383	2.41866	0.503882	-4.80005	1.58627e-06	5.39064e-05
ENSG00000249478	AC010307.3	0.675128	0.709176	3.03691	1.74257	10.7772	8.58592	6.19499	7.45178	2.41686	0.810472	-2.98204	0.0028633	0.0178049
ENSG00000148408	CACNA1B	38.3634	105.491	280.887	181.03	897.144	952.327	592.899	392.426	2.41521	0.466664	-5.17547	2.27336e-07	1.10066e-05
ENSG00000174460	ZCCHC12	4.75068	4.97535	9.62393	7.13338	33.0534	57.0431	16.5652	13.7973	2.41108	0.648352	-3.71879	0.000200182	0.00244201
ENSG00000286610	AL356433.1	0	1.23586	5.30672	14.0688	30.0116	43.6173	10.7935	15.0317	2.40886	0.793428	-3.03601	0.0023973	0.0156611
ENSG00000269802	AC011491.3	2.38312	1.27669	3.32923	3.02391	17.2303	15.8757	7.43161	11.8501	2.40664	0.669355	-3.59547	0.00032381	0.00351566
ENSG00000162643	DNAI3	5.85605	5.09611	22.9403	14.5224	23.3836	98.2586	74.5134	240.308	2.40551	0.507757	-4.73752	2.16345e-06	6.94811e-05
ENSG00000234694	AL139289.1	7.38525	2.58051	7.76858	5.18879	29.3261	46.5421	15.9766	20.5029	2.40494	0.511971	-4.69742	2.63475e-06	8.12878e-05
ENSG00000242686	PDE6B-AS1	2.52074	12.495	2.18786	4.69945	23.4286	14.7427	35.1875	17.5754	2.40281	0.654227	-3.67275	0.000239953	0.00279594
ENSG00000205177	C11orf91	5.83142	4.59438	3.15265	3.00667	25.0123	18.4236	21.4463	18.1222	2.40279	0.557804	-4.30759	1.65043e-05	0.00036143
ENSG00000117281	CD160	1.75548	1.91496	3.98419	1.60299	16.1939	16.8015	5.10816	7.05019	2.40069	0.825863	-2.90688	0.00365052	0.0212411
ENSG00000287136	AC073578.5	3.74284	0	7.87485	5.19169	27.3725	28.2021	12.2631	12.8806	2.39951	0.550672	-4.35742	1.31603e-05	0.000301767
ENSG00000254111	AC124067.3	1.844	2.79607	18.5455	6.29869	47.7422	59.582	16.3081	35.1783	2.39736	0.647151	-3.70448	0.000211821	0.00254661
ENSG00000139537	CCDC65	15.4226	3.47351	29.889	6.91879	51.3995	131.767	39.4936	184.044	2.39728	0.589952	-4.06351	4.83397e-05	0.000829256
ENSG00000075388	FGF4	2.31987	1.20666	3.12579	1.03994	11.3256	12.0898	7.32359	5.74936	2.39692	0.75626	-3.16944	0.00152734	0.0111745
ENSG00000120051	CFAP58	14.2908	9.18113	19.7586	27.4168	109.707	123.817	44.5603	132.366	2.39664	0.508665	-4.71162	2.45752e-06	7.71526e-05
ENSG00000166596	CFAP52	4.19318	2.9535	23.1412	6.26556	20.9642	105.293	20.5851	119.829	2.39386	0.622384	-3.84628	0.000119923	0.00166752
ENSG00000275126	H4C13	0	6.51584	14.9132	7.07591	19.3896	49.4713	43.7347	25.596	2.39326	0.760349	-3.14758	0.0016463	0.0118084
ENSG00000264265	LINC01925	1.31261	2.72311	6.09615	5.68055	21.8937	8.10905	33.3207	21.3617	2.39229	0.730368	-3.27546	0.00105491	0.00847873
ENSG00000205832	C16orf96	16.3592	16.6784	47.7922	41.5061	198.501	187.566	99.6554	178.359	2.39145	0.404734	-5.90869	3.44849e-09	3.42166e-07
ENSG00000267178	PHF5CP	0	1.34888	3.46102	1.02307	12.2974	6.90307	3.71694	6.47122	2.39123	0.883092	-2.70779	0.00677329	0.0334482
ENSG00000179165	PXT1	4.51797	6.00853	12.2196	25.9798	60.0203	87.2189	47.8847	34.4047	2.38685	0.441312	-5.40852	6.35468e-08	3.92693e-06
ENSG00000274292	AC084018.2	21.3904	13.6215	29.4482	17.4512	102.669	138.483	82.4127	95.7228	2.38662	0.31577	-7.55811	4.08982e-14	2.39053e-11
ENSG00000117399	CDC20	16.1792	43.3158	94.9947	67.6107	304.636	430.792	147.58	288.462	2.38643	0.452843	-5.26988	1.36514e-07	7.31444e-06
ENSG00000153060	TEKT5	9.03593	2.13727	18.2996	8.54533	47.5297	69.148	29.4577	166.367	2.38538	0.77525	-3.07692	0.00209149	0.0140724
ENSG00000173769	TOPAZ1	29.314	25.9504	203.306	177.331	646.614	694.084	370.272	281.897	2.38526	0.619673	-3.84923	0.000118492	0.00165147
ENSG00000104147	OIP5	6.68978	5.89771	53.9	37.5679	162.087	148.605	96.9706	101.227	2.38314	0.54663	-4.3597	1.30244e-05	0.000299076
ENSG00000176165	FOXG1	2.40599	6.1368	48.7431	27.4765	100.037	158.301	75.6191	128.713	2.38292	0.698265	-3.41263	0.000643383	0.00588602
ENSG00000220161	LINC02076	28.7494	27.9999	64.5491	50.0627	199.766	345.068	129.693	217.84	2.38259	0.336879	-7.07254	1.52122e-12	5.0942e-10
ENSG00000186790	FOXE3	0	0	2.27542	2.22112	4.80396	9.67944	3.70284	5.61681	2.38088	0.924556	-2.57516	0.0100195	0.0444838
ENSG00000188037	CLCN1	2.395	2.47775	5.33886	2.00789	24.508	17.3922	6.40132	15.8171	2.37973	0.627216	-3.79412	0.000148169	0.00195781
ENSG00000171587	DSCAM	6.49364	1.12259	51.3136	46.414	123.184	230.231	60.0809	65.8176	2.37953	0.772897	-3.07871	0.00207897	0.0140114
ENSG00000280639	LINC02204	38.0317	14.5978	107.4	81.9505	403.731	309.451	234.621	128.466	2.37937	0.496231	-4.79489	1.62768e-06	5.5016e-05
ENSG00000270904	ATP6V1G1P5	2.51828	0	3.57289	3.06295	16.3235	12.2143	7.53107	4.87389	2.37857	0.771808	-3.08181	0.00205743	0.0139101
ENSG00000162510	MATN1	7.73933	12.7381	9.86764	2.77767	54.9254	29.5058	34.5217	12.1884	2.37771	0.689527	-3.44832	0.000564088	0.00532266
ENSG00000238212	LINC02096	5.08611	18.9915	78.7466	123.214	292.651	384.877	205.193	112.602	2.37707	0.729346	-3.25918	0.00111736	0.00885404
ENSG00000226642	ACTG1P12	3.66355	3.82482	13.2877	13.4126	47.9151	68.5148	19.6596	24.6401	2.37659	0.513687	-4.62654	3.71834e-06	0.000106275
ENSG00000286684	AL358976.1	0	0	6.48851	7.14291	18.8235	23.6295	12.959	13.8749	2.37555	0.655077	-3.62637	0.000287429	0.00322522
ENSG00000241255	AL136126.1	2.35938	0	0	3.06238	6.22511	8.91137	6.37976	3.82264	2.37554	0.90368	-2.62875	0.00857004	0.0397026
ENSG00000229525	AC053503.1	4.56291	0	8.23841	8.1583	26.9963	46.9382	10.0109	22.2035	2.37524	0.637489	-3.72594	0.00019459	0.00238403
ENSG00000227359	AC017074.1	8.58477	5.16497	20.0528	3.03577	54.9128	58.9767	29.6399	20.7481	2.37515	0.585357	-4.05762	4.95762e-05	0.000845439
ENSG00000253614	AC025674.2	9.45312	10.3255	5.67164	9.83119	47.1466	61.0338	29.1768	57.6912	2.37292	0.416946	-5.69119	1.26157e-08	1.04528e-06
ENSG00000237118	CYP2F2P	5.18439	2.65235	7.98111	6.24834	28.8312	44.8161	13.0971	12.511	2.37201	0.650962	-3.64385	0.000268588	0.00305757
ENSG00000223404	LINC00397	0	0	5.51816	1.10922	5.08184	12.2052	9.32425	13.7319	2.3684	0.801987	-2.95317	0.00314533	0.0190605
ENSG00000163806	SPDYA	43.9068	84.0346	69.5376	44.058	201.691	545.28	187.978	440.41	2.36803	0.379236	-6.24422	4.25925e-10	6.08561e-08
ENSG00000258982	AL133523.1	2.52758	0	3.54116	2.05485	13.0511	10.9754	7.43431	5.37062	2.3671	0.827005	-2.86225	0.00420644	0.0236437
ENSG00000236362	GAGE12F	73.2721	20.9027	536.56	491.1	2294.94	1277.06	768.473	627.013	2.36644	0.920507	-2.57081	0.0101462	0.0448359
ENSG00000166947	EPB42	7.57325	16.9855	70.3403	30.6489	181.628	184.499	119.413	77.2395	2.36524	0.495234	-4.77601	1.78809e-06	5.95686e-05
ENSG00000160957	RECQL4	52.9858	64.3542	159.713	224.346	778.973	733.44	424.524	377.064	2.36495	0.416461	-5.67868	1.35737e-08	1.10162e-06
ENSG00000230645	LINC01818	1.79847	0	2.3046	6.02684	18.2699	16.9194	2.7332	8.77903	2.36419	0.857914	-2.75574	0.00585596	0.0301405
ENSG00000234170	LINC02645	2.55313	1.61127	14.5435	15.1429	52.6032	60.6717	24.2216	39.6995	2.36243	0.65748	-3.59316	0.000326697	0.00353863
ENSG00000115850	LCT	2.06032	3.22651	7.77549	1.61177	19.325	24.8483	12.7344	10.3622	2.36225	0.650203	-3.6331	0.000280034	0.00315547
ENSG00000237636	ANKRD26P3	3.9434	13.5503	41.8176	81.9434	142.499	313.23	78.9758	368.313	2.36195	0.644021	-3.66751	0.000244922	0.00284559
ENSG00000225684	FAM225B	95.7901	139.086	176.98	181.303	626.423	1233.34	432.461	984.855	2.36099	0.334471	-7.05888	1.67851e-12	5.56297e-10
ENSG00000278001	AL591926.4	2.46301	6.7982	2.33369	0	9.06398	21.3974	11.4305	16.2708	2.3574	0.712461	-3.30881	0.000936924	0.00780213
ENSG00000176177	ENTHD1	7.66328	8.31637	43.8063	73.5372	160.961	250.679	100.709	145.668	2.35719	0.59079	-3.9899	6.61022e-05	0.001062
ENSG00000129991	TNNI3	2.13348	4.5281	7.80688	7.26475	31.2816	40.2473	12.6821	29.5807	2.35541	0.542693	-4.34023	1.42336e-05	0.00032066
ENSG00000287822	AC098679.5	0	0	4.45823	4.06061	9.19831	16.3058	8.39425	6.36144	2.35338	0.814636	-2.88888	0.00386617	0.0221867
ENSG00000286181	AC232271.3	0.912301	1.92049	19.0198	11.6841	66.4897	32.7845	26.1019	19.8026	2.3527	0.690319	-3.40813	0.000654095	0.00596027
ENSG00000275026	GXYLT1P4	5.46617	1.25588	7.03161	5.11053	21.7253	38.2401	14.824	26.0693	2.35269	0.548045	-4.29287	1.76375e-05	0.000381858
ENSG00000141294	LRRC46	5.55475	4.0402	22.2798	36.881	50.6323	176.342	28.4485	261.4	2.35223	0.682851	-3.44472	0.000571641	0.00537814
ENSG00000249436	LINCR-0003	0	0.484614	1.98062	4.90038	15.0882	9.34179	4.08217	9.27356	2.35222	0.897398	-2.62115	0.00876329	0.0403017
ENSG00000277957	SENP3-EIF4A1	47.9804	15.2335	30.6304	33.0104	106.233	168	210.71	132.482	2.34717	0.33738	-6.95705	3.47463e-12	1.01548e-09
ENSG00000132972	RNF17	72.0822	21.5723	352.069	362.877	1049.79	1511.81	527.037	809.062	2.34639	0.655588	-3.57907	0.000344826	0.00370132
ENSG00000174562	KLK15	6.85729	0	2.81711	7.32459	19.5555	28.3171	13.1108	15.5434	2.34634	0.607743	-3.86075	0.000113041	0.00159109
ENSG00000251188	AC079140.3	1.01231	0	11.2059	1.97925	15.3472	32.3651	8.97244	11.188	2.34552	0.815952	-2.87458	0.00404568	0.022974
ENSG00000183206	POTEC	97.3583	111.622	429.776	430.808	993.577	2714.21	367.294	1635.94	2.34462	0.570317	-4.11108	3.93809e-05	0.000710447
ENSG00000124610	H1-1	65.2631	32.1037	242.234	178.897	636.936	794.419	547.431	387.234	2.34408	0.483803	-4.84512	1.26538e-06	4.45557e-05
ENSG00000214071	BX842568.1	0	2.58359	5.51816	2.97672	14.6255	17.9606	10.1655	6.00237	2.34397	0.699146	-3.35262	0.000800516	0.00693852
ENSG00000149548	CCDC15	41.343	91.3733	136.553	104.364	366.77	809.897	246.073	329.034	2.34376	0.480301	-4.87977	1.06212e-06	3.88454e-05
ENSG00000258654	AC026495.1	0	0	12.3706	1.88581	15.8179	28.0972	13.4218	26.5316	2.34263	0.750029	-3.12339	0.00178782	0.0125081
ENSG00000261569	AC138907.7	0	1.03932	5.32074	1.62571	7.34407	13.1746	8.09427	17.561	2.34112	0.810901	-2.88706	0.0038886	0.0222558
ENSG00000253584	AC091987.1	0.945056	2.13315	4.3676	4.83509	13.3188	19.3151	16.3722	10.6558	2.34111	0.575893	-4.06519	4.79937e-05	0.000825081
ENSG00000227745	AC098826.2	4.20136	9.49794	21.2305	1.99044	17.8312	102.025	20.8255	55.92	2.33974	0.75056	-3.11733	0.00182496	0.0126906
ENSG00000230148	HOXB-AS1	6.9043	8.33652	42.2224	23.8807	97.595	148.663	66.6544	64.3219	2.33769	0.498013	-4.69403	2.67869e-06	8.22489e-05
ENSG00000234551	LINC01309	41.1979	65.9849	102.814	96.0666	700.068	270.616	190.583	202.302	2.33704	0.55781	-4.18967	2.79358e-05	0.000544248
ENSG00000185689	C6orf201	12.6835	3.0668	14.4518	10.2914	54.4239	72.6798	19.0993	144.531	2.33372	0.635242	-3.67375	0.000239015	0.00278704
ENSG00000287751	AC015818.10	0	0	2.17366	8.08671	19.3189	16.5727	4.58258	15.1542	2.33115	0.909976	-2.56177	0.0104141	0.0456806
ENSG00000181085	MAPK15	10.1553	5.40737	21.9169	22.9395	111.348	81.4496	42.0806	112.813	2.33091	0.459743	-5.07002	3.97774e-07	1.73981e-05
ENSG00000286522	H3C2	87.3147	47.2919	366.634	338.227	1079.06	1298.78	793.356	619.524	2.33062	0.552689	-4.21687	2.47717e-05	0.000498348
ENSG00000263563	UBBP4	15.667	14.8418	111.598	91.6311	275.124	475.221	133.856	264.291	2.32957	0.645598	-3.60839	0.0003081	0.00340021
ENSG00000226979	LTA	0	0	8.32518	8.83155	14.1449	38.4089	12.8046	14.4001	2.32914	0.791805	-2.94156	0.0032656	0.0196189
ENSG00000187624	C17orf97	31.3402	21.0223	58.8346	25.6689	149.912	218.714	140.154	251.623	2.32853	0.514794	-4.52322	6.09049e-06	0.000159704
ENSG00000274766	BX072579.2	0.691916	0	22.0023	7.23274	42.0047	53.4102	14.0855	24.0158	2.32845	0.887519	-2.62355	0.00870188	0.0400973
ENSG00000242608	RPS23P5	0	1.23379	3.11454	1.9865	10.6009	7.74206	6.3871	3.67255	2.32811	0.887287	-2.62385	0.00869425	0.0400778
ENSG00000231254	PCED1CP	4.03111	3.78826	23.9629	11.3794	71.1527	53.8561	40.3309	31.1194	2.32796	0.478081	-4.86938	1.11947e-06	4.03914e-05
ENSG00000183856	IQGAP3	38.8173	44.3049	95.2653	44.2458	299.254	405.227	141.498	199.971	2.32481	0.511273	-4.54709	5.4392e-06	0.000145112
ENSG00000286626	AC090469.1	6.62041	0	10.0072	3.95788	21.4147	43.1242	15.3093	39.0751	2.32258	0.525584	-4.41904	9.91394e-06	0.000238379
ENSG00000259536	AC091045.1	2.67986	0	7.29175	8.02689	39.1452	21.3881	10.8657	27.717	2.3223	0.706438	-3.28733	0.00101141	0.00823158
ENSG00000183844	FAM3B	9.15693	10.3552	34.6949	43.7207	85.7793	236.213	49.4356	96.1132	2.31986	0.567585	-4.08725	4.36523e-05	0.000766012
ENSG00000246283	AC090510.1	8.78598	11.9998	13.9597	8.76941	37.3561	102.311	24.8485	69.7033	2.31939	0.57875	-4.00759	6.13425e-05	0.000996986
ENSG00000146410	MTFR2	23.2627	1.86482	18.7138	14.3945	96.789	94.0299	25.1543	68.9387	2.31925	0.566293	-4.0955	4.21262e-05	0.000747976
ENSG00000104112	SCG3	12.5423	3.42822	27.4618	34.7564	71.9223	163.161	60.9246	52.738	2.31842	0.527671	-4.39368	1.11446e-05	0.000261324
ENSG00000055957	ITIH1	1.61474	3.88223	8.00043	3.79196	15.0813	34.0667	12.2612	11.7725	2.31773	0.752582	-3.07971	0.00207201	0.0139734
ENSG00000273062	AL449106.1	7.63736	3.71782	8.03716	1.14821	13.2356	49.2824	14.313	33.6791	2.31736	0.670025	-3.45861	0.000542971	0.00518003
ENSG00000151962	RBM46	38.5558	35.2089	213.92	182.931	581.953	846.801	340.37	447.158	2.31732	0.548144	-4.22757	2.36225e-05	0.000480297
ENSG00000166246	C16orf71	32.1193	21.5971	53.4328	48.0337	245.071	267.845	81.793	412.78	2.31615	0.45064	-5.13969	2.75198e-07	1.28778e-05
ENSG00000175189	INHBC	2.3704	6.20522	10.7331	5.07977	35.729	43.3152	12.9278	23.4542	2.31549	0.556738	-4.15904	3.19586e-05	0.000603395
ENSG00000180422	LINC00304	9.46698	7.0735	15.9535	15.5585	68.4136	64.916	47.9957	29.2738	2.31547	0.374162	-6.18842	6.07695e-10	8.20848e-08
ENSG00000215568	GAB4	17.8646	3.67397	26.7104	51.6377	132.791	152.998	92.5745	85.6998	2.31236	0.508375	-4.54852	5.40238e-06	0.000144309
ENSG00000185697	MYBL1	30.2302	59.5727	138.456	66.7862	302.139	569.321	230.759	341.341	2.31206	0.42459	-5.44541	5.16858e-08	3.31656e-06
ENSG00000280417	AC096887.2	4.87443	2.46535	7.53792	5.32302	17.0131	46.5458	13.07	50.2496	2.31165	0.535437	-4.31731	1.57941e-05	0.000348728
ENSG00000185055	EFCAB10	2.73346	3.60736	4.25408	3.13822	12.0643	33.0821	7.29341	51.4408	2.31083	0.596084	-3.87669	0.000105886	0.00151762
ENSG00000197172	MAGEA6	12.3825	7.11561	83.4019	65.2553	308.808	183.884	133.64	83.5675	2.31071	0.639434	-3.61367	0.000301889	0.0033466
ENSG00000180113	TDRD6	218.556	80.1302	553.065	438.466	1734.1	2129.38	933.404	1174.24	2.3076	0.52636	-4.38408	1.16476e-05	0.000270734
ENSG00000118160	SLC8A2	27.2107	5.73716	56.1443	49.502	207.053	193.557	115.166	96.157	2.30693	0.597994	-3.85778	0.000114424	0.00160773
ENSG00000250765	AC138035.2	3.57594	5.09647	3.24213	14.1203	37.8719	46.2353	13.9726	14.9871	2.30689	0.691394	-3.33658	0.000848173	0.00724028
ENSG00000248762	AC012339.1	1.08972	1.20974	5.98697	6.04007	33.8676	12.7129	8.1493	8.76087	2.30517	0.770224	-2.99286	0.0027638	0.017357
ENSG00000254454	RCC2P6	3.61444	4.97148	5.37994	3.07099	21.7875	34.1418	7.32457	20.2263	2.30465	0.624077	-3.6929	0.000221711	0.00262816
ENSG00000258199	AC073896.4	1.24255	6.5949	14.5908	9.35546	50.7313	40.2912	28.4666	29.8348	2.30339	0.514407	-4.47775	7.5433e-06	0.000190946
ENSG00000157456	CCNB2	27.7029	17.4342	94.4654	98.3473	325.071	358.214	199.833	359.001	2.30338	0.479605	-4.80265	1.56576e-06	5.33786e-05
ENSG00000125207	PIWIL1	42.089	58.9792	231.189	124.505	460.872	919.852	304.612	1388.25	2.30183	0.476194	-4.8338	1.3395e-06	4.70113e-05
ENSG00000187690	EZHIP	23.0804	26.8975	64.8982	43.7387	259.595	208.341	121.68	79.0441	2.30123	0.380441	-6.04884	1.4589e-09	1.64564e-07
ENSG00000275793	RIMBP3	8.88286	0	17.8193	5.27393	44.8602	53.2804	20.7888	623.995	2.29883	0.535502	-4.29285	1.7639e-05	0.000381858
ENSG00000126890	CTAG2	4.79792	5.17226	32.3354	20.2743	90.9464	88.291	52.5305	33.8823	2.2984	0.603929	-3.80574	0.000141378	0.00189014
ENSG00000175513	TSGA10IP	0	6.99194	0.932952	0	6.83017	17.7607	2.5996	31.0739	2.29743	0.856105	-2.68359	0.00728373	0.0352434
ENSG00000284738	AL358472.5	12.0886	11.3805	29.3377	14.173	86.9919	116.829	45.3719	72.6791	2.29683	0.374527	-6.13261	8.64473e-10	1.07301e-07
ENSG00000235768	BRD7P5	1.16315	0	3.1536	2.05131	9.49195	7.40727	7.43887	5.47843	2.296	0.817559	-2.80836	0.00497948	0.0267559
ENSG00000164078	MST1R	10.7627	6.54844	41.4066	42.8759	159.466	152.324	55.63	93.3749	2.29544	0.640448	-3.58412	0.000338219	0.00364868
ENSG00000257443	AC068305.2	3.49072	0	3.23162	2.0194	10.9782	12.3577	9.29932	5.16684	2.29528	0.79083	-2.90236	0.00370359	0.0214493
ENSG00000213307	RPL18P11	0	0	4.50953	2.04016	6.84634	11.3556	6.63402	5.86622	2.29488	0.812825	-2.82333	0.00475271	0.0258178
ENSG00000261771	DNAAF4-CCPG1	0	4.04924	28.3059	5.88898	51.7188	77.8992	16.3055	34.0564	2.29414	0.888671	-2.58154	0.00983618	0.0438637
ENSG00000259697	AC126323.2	60.7673	51.1838	108.102	64.1668	295.354	592.426	158.764	358.942	2.2933	0.403595	-5.6822	1.32977e-08	1.08501e-06
ENSG00000186281	GPAT2	79.3527	83.0517	181.402	122.706	804.58	616.806	299.192	309.571	2.29169	0.344711	-6.64815	2.96804e-11	6.03902e-09
ENSG00000105717	PBX4	17.1988	13.9756	41.4059	40.3167	144.28	173.646	91.8756	100.903	2.29166	0.3404	-6.73225	1.67063e-11	3.72968e-09
ENSG00000159450	TCHH	7.4913	16.3396	24.2519	23.8187	114.528	83.4308	68.8935	41.7184	2.29079	0.355124	-6.45067	1.1136e-10	1.92472e-08
ENSG00000051180	RAD51	15.6278	15.1175	49.313	48.2037	180.765	187.778	105.182	162.969	2.28951	0.425691	-5.37835	7.51726e-08	4.50028e-06
ENSG00000145451	GLRA3	9.11309	5.06687	11.3598	8.82506	39.795	83.665	14.064	36.5309	2.28909	0.534545	-4.28231	1.84962e-05	0.000394569
ENSG00000253399	AC078852.1	6.21139	6.5307	6.7346	7.01822	39.0758	38.1174	20.3441	16.7844	2.2886	0.469844	-4.87099	1.11043e-06	4.01103e-05
ENSG00000166897	ELFN2	4.82896	51.434	27.794	28.4018	75.84	194.141	86.4075	381.067	2.28754	0.604243	-3.7858	0.000153214	0.00200811
ENSG00000167476	JSRP1	3.40808	0.717062	0.656115	7.53541	26.1796	8.19973	3.29193	15.5902	2.28567	0.827955	-2.76062	0.0057691	0.0298127
ENSG00000186393	KRT26	1.14177	0	3.09698	5.02749	19.9049	8.80068	6.45799	5.39518	2.2853	0.862524	-2.64955	0.00805985	0.0380202
ENSG00000269072	AC063977.5	2.39757	8.79195	12.9185	10.3844	47.8997	54.0139	25.8732	25.16	2.28519	0.458948	-4.9792	6.38464e-07	2.53918e-05
ENSG00000278922	AC002310.5	3.79096	6.39211	7.91354	3.20931	21.6262	40.228	16.0996	42.0093	2.28505	0.517002	-4.4198	9.87929e-06	0.000237902
ENSG00000234394	AL353608.3	7.94449	3.09348	3.54301	8.60565	52.3776	25.7279	7.24085	198.488	2.28479	0.773605	-2.95343	0.00314266	0.0190515
ENSG00000223601	EBLN1	1.14463	1.23653	2.07201	1.0136	5.57019	10.1419	4.58273	9.25818	2.28117	0.829902	-2.74872	0.00598285	0.0305781
ENSG00000114487	MORC1	42.2597	27.109	191.633	171.156	536.982	684.031	357.627	371.155	2.28083	0.516865	-4.41281	1.02038e-05	0.00024389
ENSG00000140986	RPL3L	30.8162	31.2929	86.6105	54.6532	363.953	206.24	168.256	131.081	2.28037	0.369267	-6.1754	6.59962e-10	8.69526e-08
ENSG00000255344	LINC02706	0	0	0.903802	8.89181	8.42268	9.50159	10.7655	12.8453	2.28008	0.83394	-2.7341	0.00625509	0.0316103
ENSG00000214391	TUBAP2	0	0	4.30658	7.10373	15.3702	18.1264	10.1182	8.35948	2.27769	0.711278	-3.20225	0.00136358	0.010283
ENSG00000156222	SLC28A1	6.39677	1.33163	1.8222	1.08975	15.0471	14.7151	9.12055	6.10674	2.27751	0.799761	-2.84774	0.00440314	0.024435
ENSG00000275714	H3C1	176.152	133.875	503.524	382.087	1139.51	2032.33	1180.25	1022.59	2.27726	0.403216	-5.64775	1.62564e-08	1.27466e-06
ENSG00000206549	AC109583.1	17.3255	6.27351	12.0625	2.07707	59.7264	43.407	32.5718	28.6733	2.27628	0.561296	-4.05539	5.00506e-05	0.000852057
ENSG00000154920	EME1	17.1722	21.4296	44.4222	38.1893	161.534	206.176	90.2397	142.748	2.2742	0.347364	-6.54702	5.86957e-11	1.10348e-08
ENSG00000288002	AC091912.3	1.12192	3.6531	3.05484	5.11998	8.39306	29.6964	9.14387	7.50032	2.2731	0.815083	-2.7888	0.00529042	0.0280515
ENSG00000160207	HSF2BP	37.4099	39.4167	94.3015	101.117	308.1	425.47	262.407	294.183	2.27281	0.310253	-7.32567	2.37704e-13	1.04681e-10
ENSG00000151846	PABPC3	0	3.59819	32.9239	18.0335	48.075	127.449	24.4121	351.864	2.2696	0.747978	-3.03431	0.00241083	0.0157263
ENSG00000261194	LINC01898	2.20098	2.37689	5.98945	7.98871	28.8124	30.0105	11.633	20.2248	2.26791	0.584867	-3.87764	0.000105473	0.00151238
ENSG00000170627	GTSF1	12.5709	13.7939	117.968	75.1901	200.767	414.743	179.285	440.407	2.26707	0.652344	-3.47527	0.000510341	0.00494761
ENSG00000167900	TK1	4.26123	11.4503	10.9225	11.1373	57.935	49.0898	28.3741	25.6515	2.26699	0.441152	-5.13879	2.7651e-07	1.29017e-05
ENSG00000160973	FOXH1	0	0	6.91699	7.27937	15.2308	20.2423	12.5088	7.08416	2.26683	0.893359	-2.53742	0.0111673	0.0480535
ENSG00000178795	GDPD4	0.724662	5.02111	54.787	60.1794	139.667	179.759	110.717	113.738	2.26628	0.828724	-2.73467	0.00624436	0.0315734
ENSG00000165164	CFAP47	17.5859	8.48997	42.7359	74.8106	207.38	190.196	122.833	99.6266	2.26615	0.555913	-4.07645	4.5729e-05	0.000793445
ENSG00000011426	ANLN	37.8221	30.3761	223.183	197.229	523.043	811.368	427.08	378.916	2.26602	0.55403	-4.09007	4.31242e-05	0.000759232
ENSG00000128262	POM121L9P	27.1435	35.8921	62.547	19.0863	68.1233	394.745	57.4271	1102.58	2.2659	0.608163	-3.7258	0.000194693	0.00238438
ENSG00000278238	AL359513.1	1.16129	1.28702	6.4929	3.03527	21.7539	14.5691	8.2621	29.4993	2.26402	0.583013	-3.8833	0.000103047	0.00148728
ENSG00000232727	YWHAEP1	0	0	8.23292	3.0132	16.7714	19.7642	6.45197	42.3106	2.26299	0.678328	-3.33613	0.000849532	0.00724615
ENSG00000161681	SHANK1	55.0498	7.5565	49.0289	115.577	420.534	204.734	189.42	117.988	2.26272	0.555646	-4.07224	4.65638e-05	0.000804802
ENSG00000285856	AL353704.1	6.54545	2.38008	9.88287	8.97048	23.7132	64.8876	13.4386	36.7074	2.26167	0.582948	-3.87971	0.000104582	0.00150362
ENSG00000272589	ZSWIM8-AS1	2.45628	0	11	6.22041	35.1223	21.2368	15.9611	21.6581	2.26115	0.633939	-3.56683	0.000361332	0.0038251
ENSG00000180279	LINC01869	2.49627	2.10561	17.5963	6.20164	42.1762	30.5299	29.6232	24.7937	2.26111	0.524908	-4.30763	1.65011e-05	0.00036143
ENSG00000158639	PAGE5	6.82527	2.58522	71.4339	63.0097	187.643	210.818	122.356	72.4089	2.26042	0.701509	-3.22223	0.00127197	0.00974261
ENSG00000176933	TOB2P1	3.67433	1.28295	8.87705	4.15786	25.4572	31.2723	9.34586	18.9792	2.25936	0.544588	-4.14876	3.34284e-05	0.000625163
ENSG00000005471	ABCB4	4.58752	4.02246	37.1523	13.7599	95.74	76.1465	33.6422	34.6734	2.25823	0.701861	-3.21748	0.00129321	0.00986337
ENSG00000010379	SLC6A13	4.33371	4.83729	14.2052	5.68237	28.2741	54.305	20.6357	39.9919	2.25814	0.550029	-4.10549	4.03456e-05	0.000724193
ENSG00000253293	HOXA10	1.94121	3.26744	2.61721	1.04585	11.9132	10.84	9.76798	5.07998	2.25794	0.780545	-2.89277	0.00381859	0.0219729
ENSG00000127412	TRPV5	15.8638	10.1056	3.89136	8.23391	40.5447	54.9025	35.4801	35.8426	2.25734	0.474411	-4.75818	1.95343e-06	6.39499e-05
ENSG00000181800	CELF2-AS1	3.40541	1.20701	14.3621	6.01116	26.4664	47.4558	18.1407	44.9514	2.25731	0.555503	-4.06353	4.83351e-05	0.000829256
ENSG00000207274	SNORA70I	1.23384	0	1.21944	7.18632	12.1027	15.4895	8.85716	7.22013	2.25653	0.843379	-2.67559	0.00745979	0.0358364
ENSG00000153230	OR14K1	0	0	5.23746	5.98304	12.3533	16.7862	13.5944	12.6161	2.25517	0.6257	-3.60424	0.000313066	0.00343731
ENSG00000242781	LINC02050	1.1186	0	15.4131	2.86285	18.1719	40.0777	12.1082	25.7496	2.25502	0.726867	-3.10239	0.00191966	0.0131866
ENSG00000186638	KIF24	70.643	57.7805	212.667	201.627	697.496	849.609	399.915	564.715	2.25453	0.417259	-5.40318	6.54689e-08	4.02427e-06
ENSG00000213401	MAGEA12	9.88485	7.79961	37.5767	38.6215	170.236	82.9236	84.8902	43.6017	2.25256	0.51911	-4.33928	1.42952e-05	0.000321597
ENSG00000205301	MGAT4D	0	0	5.88464	5.52391	7.84164	30.9004	8.76692	224.636	2.25211	0.601271	-3.74559	0.000179973	0.0022583
ENSG00000285978	AC113348.2	0	1.25626	10.7948	1.02948	10.505	27.9304	9.28363	19.0996	2.25114	0.792807	-2.83946	0.00451906	0.0248834
ENSG00000171405	XAGE5	0.93562	4.00501	3.39747	10.2022	24.3456	27.0792	10.4817	9.16081	2.2504	0.660352	-3.40788	0.000654699	0.00596409
ENSG00000186086	NBPF6	5.94948	0	9.97254	0	22.4541	22.123	11.4287	31.5513	2.24766	0.844825	-2.6605	0.00780238	0.037086
ENSG00000260776	AC104758.2	10.1066	5.33522	31.1895	2.70921	27.8028	122.643	26.9008	113.181	2.24716	0.744242	-3.01939	0.00253283	0.0162494
ENSG00000233437	AC118758.1	10.2809	24.6741	37.816	26.6021	127.485	148.293	79.973	89.4672	2.24654	0.380655	-5.90177	3.59632e-09	3.53561e-07
ENSG00000215117	LINC00588	0	0	1.95114	2.9868	6.83369	5.98084	6.29304	23.6805	2.24613	0.787088	-2.85372	0.00432104	0.0241126
ENSG00000239589	LINC00879	6.85744	1.03705	24.9156	27.8912	77.9688	89.4791	50.4324	72.6073	2.24474	0.5878	-3.81889	0.000134053	0.0018176
ENSG00000255992	AC131009.1	4.94228	1.30914	4.50634	0	11.3657	17.8784	8.37943	8.68189	2.24472	0.739824	-3.03413	0.00241229	0.0157263
ENSG00000188425	NANOS2	2.52735	3.81493	13.3182	12.2713	31.8366	58.0819	25.3301	18.8915	2.24419	0.711369	-3.15475	0.00160637	0.011597
ENSG00000166763	STRCP1	14.595	23.914	21.6689	0	69.6598	116.784	26.0558	47.0497	2.24419	0.632859	-3.54611	0.000390961	0.00405831
ENSG00000013810	TACC3	281.048	190.469	398.013	374.868	1586.1	1910.83	927.726	1111.24	2.2429	0.285446	-7.85752	3.91808e-15	3.59713e-12
ENSG00000284672	AC109583.4	13.2932	0	9.7725	7.22224	28.8441	42.0639	37.1453	17.9537	2.24235	0.553354	-4.05229	5.07185e-05	0.000860875
ENSG00000120669	SOHLH2	11.4032	16.9902	18.5861	40.1485	114.934	113.128	83.4236	184.985	2.24162	0.476674	-4.70263	2.56828e-06	7.9773e-05
ENSG00000180210	F2	6.76007	0.78654	10.6742	3.44884	38.246	18.6135	16.9365	10.9444	2.24111	0.753596	-2.97388	0.00294058	0.0181621
ENSG00000286651	PRSS43P	9.52419	4.99496	10.7493	12.2195	35.1449	47.7711	51.5175	21.8942	2.24079	0.447468	-5.00771	5.5082e-07	2.26732e-05
ENSG00000176601	MAP3K19	0	0.802766	19.1602	9.71131	19.661	58.2372	24.4307	121.118	2.24068	0.802824	-2.79099	0.00525464	0.0279033
ENSG00000149380	P4HA3	18.5107	25.6791	34.6072	20.3492	188.669	74.468	92.4513	66.2941	2.24047	0.355885	-6.29548	3.06446e-10	4.65798e-08
ENSG00000286959	AC104383.1	0	6.05964	2.05128	3.00164	14.4805	15.6814	9.01205	9.49838	2.23908	0.670659	-3.33862	0.000841944	0.00720054
ENSG00000168491	CCDC110	29.081	39.8374	24.265	31.5769	100.476	232.798	101.847	554.584	2.23886	0.372239	-6.01456	1.80376e-09	1.92365e-07
ENSG00000246863	GPR176-DT	10.3627	8.51028	33.6485	19.9311	65.928	153.078	37.2748	100.098	2.23615	0.529599	-4.22234	2.4178e-05	0.000489467
ENSG00000231105	ECE1-AS1	3.20577	4.58736	9.16227	3.62451	20.515	42.689	9.75148	18.2787	2.23498	0.598882	-3.73192	0.000190024	0.0023428
ENSG00000122728	TAF1L	36.1686	19.7114	102.754	85.3084	326.775	376.307	162.084	183.352	2.23457	0.447285	-4.99585	5.85769e-07	2.3717e-05
ENSG00000263612	AF186192.3	1.23612	2.55949	11.9437	5.11893	31.2442	27.8181	16.6861	19.2004	2.2329	0.515057	-4.33524	1.45598e-05	0.000325953
ENSG00000227802	DNAJB3	0	1.23631	17.8661	14.1094	39.4368	52.8163	26.7086	87.0599	2.23273	0.802992	-2.78052	0.00542725	0.0285557
ENSG00000198681	MAGEA1	7.03484	2.48516	44.5752	49.7839	175.96	110.622	82.0423	51.264	2.23267	0.689108	-3.23995	0.00119552	0.00929695
ENSG00000197177	ADGRA1	0	3.72601	6.05387	5.72312	20.9941	20.0595	13.533	10.5322	2.2321	0.730466	-3.05572	0.0022452	0.0148625
ENSG00000241361	SLC25A24P1	0	2.45554	11.6025	2.94407	28.3121	21.6114	12.4969	22.1456	2.23021	0.673027	-3.3137	0.000920708	0.00769803
ENSG00000271494	AC034205.3	2.38532	1.24678	6.44916	5.05742	29.6472	14.5156	10.0913	7.55414	2.23001	0.744908	-2.99367	0.00275645	0.0173312
ENSG00000242756	RHOT1P3	0	2.69456	7.89758	7.17683	18.8775	36.9181	8.36021	29.3923	2.22784	0.620676	-3.58938	0.000331462	0.00358541
ENSG00000287780	AC104850.2	2.29036	2.45811	2.1079	1.99762	13.0693	10.7051	7.31148	7.30167	2.2277	0.685852	-3.24809	0.00116184	0.0090989
ENSG00000283117	MGC4859	2.16554	2.3656	7.81333	10.9745	25.5389	47.1078	11.6694	22.2168	2.22654	0.594634	-3.74438	0.00018084	0.00226476
ENSG00000184100	BRD7P2	2.32254	2.48651	26.229	14.3162	37.8672	96.1026	26.8592	33.7257	2.22397	0.733166	-3.03337	0.00241836	0.0157475
ENSG00000223723	TFDP1P2	1.21161	0	3.27677	6.11073	16.5568	14.6623	7.40173	6.02793	2.22348	0.767576	-2.89676	0.00377035	0.021765
ENSG00000197849	OR8G1	1.94765	3.22447	12.3674	13.8917	16.8375	72.4581	23.9636	24.7859	2.22186	0.70969	-3.13075	0.00174362	0.0122898
ENSG00000287144	AC097511.1	7.99587	3.66721	44.6523	26.0539	90.3542	167.927	31.7684	46.6682	2.21952	0.665142	-3.33691	0.000847154	0.00724028
ENSG00000101412	E2F1	59.5013	44.3193	127.33	66.1846	432.114	370.919	237.782	175.638	2.21773	0.298283	-7.43498	1.04585e-13	5.17261e-11
ENSG00000165182	CXorf58	2.66131	2.8871	8.73614	15.2539	43.245	36.763	18.1075	21.2747	2.21665	0.556292	-3.98468	6.757e-05	0.00108179
ENSG00000196408	NOXO1	5.21436	3.49747	7.7767	3.83656	20.2541	33.3835	20.7649	17.1134	2.2159	0.523877	-4.22981	2.33893e-05	0.000476502
ENSG00000157653	C9orf43	67.9325	29.5803	118.525	64.4054	258.003	536.826	184.218	349.163	2.21475	0.399504	-5.54375	2.96063e-08	2.10572e-06
ENSG00000095777	MYO3A	7.38847	6.62181	94.772	48.9248	199.516	224.861	114.888	155.59	2.21386	0.662178	-3.3433	0.00082789	0.00711061
ENSG00000287534	AC110792.4	2.21591	8.34999	2.00323	6.95958	18.0627	36.2576	13.4739	19.654	2.21371	0.558722	-3.96209	7.42972e-05	0.00115778
ENSG00000100218	RSPH14	16.0491	25.5312	20.0742	14.3704	68.7296	122.428	67.2222	96.6238	2.21168	0.326746	-6.7688	1.29853e-11	3.02502e-09
ENSG00000167646	DNAAF3	9.35854	16.1899	19.4674	9.62835	49.1591	83.9609	56.3337	315.262	2.21162	0.393075	-5.62648	1.83929e-08	1.41797e-06
ENSG00000221867	MAGEA3	22.3264	6.21706	81.2433	78.6242	269.084	189.724	196.408	96.0135	2.20732	0.625936	-3.52643	0.000421202	0.00428942
ENSG00000102904	TSNAXIP1	41.5911	27.7795	61.9388	43.1724	191.92	296.059	111.827	272.243	2.2073	0.326077	-6.76926	1.29439e-11	3.02502e-09
ENSG00000198930	CSAG1	3.42569	1.52883	1.924	6.87839	23.3794	18.9359	6.19895	6.47563	2.20685	0.784133	-2.81438	0.00488713	0.0263521
ENSG00000257698	GIHCG	89.0113	67.8086	98.1583	61.7456	363.934	502.374	230.176	508.361	2.20516	0.26113	-8.44469	3.04841e-17	6.12502e-14
ENSG00000258773	AC087636.1	1.07609	0	3.57512	4.12303	5.25219	16.2876	10.9826	5.32396	2.20371	0.847122	-2.60141	0.00928405	0.042009
ENSG00000162779	AXDND1	24.9396	27.1384	49.796	46.3967	155.279	262.057	103.822	296.697	2.20241	0.364864	-6.03624	1.57744e-09	1.75472e-07
ENSG00000186509	OR9Q1	3.4343	0	3.11475	0	9.40446	8.47989	5.28542	5.6259	2.20184	0.843896	-2.60914	0.00907703	0.0413092
ENSG00000145113	MUC4	4.94316	1.48398	62.8235	20.5577	110.076	122.558	66.3389	93.1097	2.20149	0.738422	-2.98134	0.00286989	0.0178386
ENSG00000287887	AL391560.2	2.24676	0	5.08085	1.99225	2.12681	27.1591	4.48774	113.991	2.20128	0.755364	-2.91419	0.00356609	0.0208824
ENSG00000258484	SPESP1	95.7974	92.9562	126.452	98.0577	341.495	750.133	334.773	358.481	2.20082	0.333113	-6.60682	3.92655e-11	7.697e-09
ENSG00000261713	SSTR5-AS1	1.76818	0.586579	3.80665	3.36522	10.8376	10.1721	11.7497	7.79353	2.20072	0.730651	-3.012	0.00259536	0.0165383
ENSG00000181143	MUC16	3.05918	15.9871	24.8663	137.316	222.554	131.71	271.254	252.282	2.19972	0.785948	-2.79881	0.00512917	0.0274012
ENSG00000261359	PYCARD-AS1	1.27558	3.81219	6.75965	3.17802	11.8561	30.0011	10.469	7.11909	2.19808	0.734419	-2.99295	0.00276296	0.017357
ENSG00000231086	TSSK1A	1.23113	3.90643	6.71009	2.05528	13.3579	26.1295	8.44197	12.2081	2.19596	0.697745	-3.14723	0.00164827	0.0118173
ENSG00000188525	AC010969.1	3.69361	6.85017	25.071	21.6648	117.525	53.0047	29.305	36.6668	2.19579	0.615038	-3.57017	0.000356751	0.00379009
ENSG00000231784	DBIL5P	25.9293	8.3769	23.6382	27.3643	60.3642	158.663	70.8086	118.327	2.19531	0.410459	-5.34842	8.87243e-08	5.11166e-06
ENSG00000089558	KCNH4	1.26281	12.5914	5.54529	2.07039	36.3514	21.0198	15.1446	11.6446	2.19424	0.6564	-3.34284	0.000829245	0.00711654
ENSG00000178233	TMEM151B	2.23401	2.24763	14.9478	12.4504	49.0428	34.97	26.9474	26.3377	2.19354	0.647869	-3.38577	0.000709795	0.00634375
ENSG00000287493	AC069503.5	1.11575	1.213	4.07884	0.999593	3.50394	16.0888	6.36652	11.0229	2.19236	0.796676	-2.75188	0.00592541	0.0303812
ENSG00000156466	GDF6	3.61093	0	8.57409	5.23701	16.1768	28.6031	16.7876	15.2958	2.19234	0.561774	-3.90253	9.51934e-05	0.00140187
ENSG00000223518	CSNK1A1P1	5.21032	3.37336	27.8399	11.1598	48.5312	75.7774	40.295	65.7178	2.19006	0.546587	-4.00679	6.15483e-05	0.000998651
ENSG00000268758	ADGRE4P	10.9052	17.742	33.3546	9.54076	55.4286	128.023	63.3972	54.8122	2.18925	0.460696	-4.75205	2.01364e-06	6.55871e-05
ENSG00000246323	AC113382.1	4.51202	4.85555	5.09013	7.01041	23.6219	37.5094	13.5024	33.4321	2.18841	0.488219	-4.48243	7.37975e-06	0.000187693
ENSG00000124092	CTCFL	109.695	119.361	314.74	242.754	1054.95	977.144	672.097	415.842	2.18642	0.311184	-7.02613	2.12346e-12	6.75892e-10
ENSG00000119715	ESRRB	3.16232	1.55163	9.61181	1.88424	14.925	21.486	9.45782	24.2154	2.18592	0.678986	-3.21939	0.00128465	0.00981206
ENSG00000155265	GOLGA7B	8.19074	5.8053	29.9948	23.1724	94.0958	85.1328	53.0091	39.8698	2.18579	0.476027	-4.59174	4.39568e-06	0.00012109
ENSG00000066279	ASPM	64.8304	47.7368	279.012	305.351	731.317	1192.51	456.332	510.141	2.1857	0.546888	-3.99662	6.42539e-05	0.00103593
ENSG00000247624	CPEB2-DT	18.4398	12.8911	25.4932	12.7997	62.8664	140.836	35.5123	125.128	2.184	0.422492	-5.16933	2.34928e-07	1.13571e-05
ENSG00000287419	AL121929.3	5.90978	11.1509	3.19347	0	20.7346	34.6265	11.9645	10.0713	2.18375	0.693028	-3.15103	0.00162693	0.011693
ENSG00000142235	LMTK3	17.4679	10.9132	14.9703	7.82344	66.2067	54.6399	42.4257	27.5982	2.18113	0.38475	-5.66894	1.4368e-08	1.15475e-06
ENSG00000153044	CENPH	51.9342	38.8083	140.144	120.754	405.182	545.148	252.745	229.422	2.18049	0.373165	-5.84323	5.1198e-09	4.81261e-07
ENSG00000113722	CDX1	6.87455	2.81448	18.1384	14.9343	55.2485	74.9464	18.6104	20.8155	2.17898	0.625325	-3.48456	0.000492942	0.00482262
ENSG00000185247	MAGEA11	14.5185	5.86496	63.7412	43.3141	204.101	153.621	75.8999	60.6394	2.17773	0.608138	-3.58098	0.000342307	0.00368043
ENSG00000245059	AC092718.1	2.37871	1.25716	2.15124	3.06729	8.78251	16.2814	5.56032	11.0067	2.17625	0.73984	-2.94151	0.00326616	0.0196189
ENSG00000130294	KIF1A	159.846	371.12	487.897	670.924	2856.03	1938.37	928.897	1025.38	2.17472	0.416849	-5.21704	1.81808e-07	9.21886e-06
ENSG00000237136	C4orf51	0.640885	0	16.5235	6.61409	30.9531	15.6019	19.6852	19.6798	2.17277	0.855847	-2.53873	0.0111255	0.0479184
ENSG00000288038	AL445588.1	4.24606	0	27.1428	4.89744	20.5605	87.1447	16.7236	21.372	2.17172	0.851664	-2.54998	0.010773	0.0467699
ENSG00000260648	AC020658.3	4.6619	1.23139	8.42602	6.08829	20.0712	37.8496	12.7836	18.0271	2.17078	0.573855	-3.7828	0.000155074	0.00202491
ENSG00000127578	WFIKKN1	26.1211	14.9568	31.8457	45.8529	140.473	178.751	83.6563	62.622	2.16555	0.430349	-5.03207	4.8521e-07	2.0417e-05
ENSG00000130695	CEP85	143.963	197.172	453.962	414.867	1597.23	1658.58	817.155	915.242	2.16442	0.349992	-6.1842	6.2417e-10	8.36076e-08
ENSG00000176732	PFN4	8.56062	12.811	29.8676	13.6208	71.938	104.491	37.9742	245.808	2.16123	0.43864	-4.92712	8.34502e-07	3.17636e-05
ENSG00000151838	CCDC175	6.15194	2.09782	18.7071	43.5023	56.8113	132.289	49.923	60.9962	2.15972	0.678033	-3.18528	0.00144615	0.0107221
ENSG00000287329	FP326651.1	24.5323	20.9167	23.0469	10.1287	127.025	50.5712	84.8135	75.7611	2.15894	0.505488	-4.271	1.94599e-05	0.000412119
ENSG00000244998	AC100803.2	2.40158	3.79771	8.65346	3.05155	16.7779	30.0945	13.8289	14.3373	2.15878	0.599196	-3.6028	0.000314806	0.00344934
ENSG00000171450	CDK5R2	2.61181	1.26661	9.13633	5.44435	22.4683	26.3072	14.3577	13.4795	2.15869	0.598589	-3.6063	0.000310588	0.00342062
ENSG00000134160	TRPM1	3.65209	2.88582	12.3164	7.96983	31.3097	37.8258	21.7323	71.142	2.15666	0.465721	-4.63079	3.6427e-06	0.000104372
ENSG00000273100	AL596442.2	1.18886	2.50632	4.27416	2.02471	11.586	10.0386	11.9942	4.77074	2.15607	0.797363	-2.704	0.00685109	0.033736
ENSG00000166823	MESP1	3.55542	0	10.6624	11.4339	32.9372	40.3531	14.4763	22.9878	2.156	0.624246	-3.45376	0.000552822	0.00525465
ENSG00000133020	MYH8	2.35248	3.71468	9.5126	2.04013	20.7559	30.3398	8.36147	13.7171	2.15316	0.658007	-3.27225	0.00106695	0.00855586
ENSG00000224223	VSTM2A-OT1	0	1.12921	8.1679	5.85944	29.8979	15.7774	7.88305	9.47665	2.1525	0.747115	-2.88108	0.00396317	0.0226007
ENSG00000228295	LINC00392	17.9203	19.9572	68.8866	67.8317	209.801	266.807	110.191	91.7311	2.15172	0.46194	-4.65801	3.19281e-06	9.46885e-05
ENSG00000288271	AL136981.4	0	7.52046	15.0751	9.21763	41.8788	44.85	20.5498	77.9688	2.15141	0.567164	-3.79328	0.000148671	0.00196202
ENSG00000254733	AP001831.1	2.41134	1.24191	5.28488	2.01945	16.2039	11.8399	9.19777	8.42079	2.15046	0.635084	-3.38609	0.00070895	0.00633796
ENSG00000177138	FAM9B	40.6113	40.7412	68.1124	56.4232	265.952	272.359	153.767	112.6	2.14981	0.255929	-8.40003	4.46368e-17	8.44107e-14
ENSG00000137225	CAPN11	3.29583	4.52338	17.4343	2.154	26.8106	63.5697	10.2122	256.069	2.14951	0.636408	-3.37757	0.000731296	0.00648722
ENSG00000147256	ARHGAP36	1.20712	0	8.66263	6.43659	23.2847	21.7595	12.7526	12.5389	2.14922	0.616065	-3.48863	0.000485498	0.00476507
ENSG00000151164	RAD9B	43.7571	55.4575	215.99	104.073	407.387	619.009	358.627	393.847	2.14915	0.418629	-5.13378	2.83983e-07	1.31359e-05
ENSG00000161594	KLHL10	1.74206	3.69209	5.33147	6.14822	9.40557	29.6599	14.075	173.317	2.14855	0.828844	-2.59223	0.00953561	0.0428808
ENSG00000116032	GRIN3B	1.23188	2.34613	4.29922	3.06366	24.3499	5.37222	8.01865	7.37495	2.14854	0.773623	-2.77725	0.00548215	0.0287645
ENSG00000235296	AC145207.1	0	1.33981	3.42934	9.26592	22.0434	11.8977	14.2641	6.39768	2.14824	0.803022	-2.6752	0.00746851	0.0358729
ENSG00000105737	GRIK5	226.219	118.837	227.896	84.5753	784.32	997.736	395.946	585.813	2.14489	0.385143	-5.56907	2.56102e-08	1.87987e-06
ENSG00000188316	ENO4	14.0473	6.9366	17.5307	6.66206	38.2647	69.9564	42.6224	35.4258	2.14476	0.370217	-5.79324	6.90413e-09	6.23466e-07
ENSG00000178460	MCMDC2	55.5057	57.0338	136.317	98.9216	315.451	581.08	259.444	332.147	2.14445	0.338356	-6.33786	2.32972e-10	3.68083e-08
ENSG00000164647	STEAP1	11.5962	6.67306	25.6382	19.8047	70.7594	79.2929	62.5528	30.3311	2.14366	0.49903	-4.29565	1.74182e-05	0.000378352
ENSG00000167634	NLRP7	9.55338	5.47989	41.7409	24.5044	92.3988	160.245	16.8293	66.906	2.13947	0.78835	-2.71386	0.00665038	0.0330034
ENSG00000164796	CSMD3	61.0425	39.4524	133.881	129.966	461.076	601.958	145.767	360.025	2.13621	0.468726	-4.55747	5.17734e-06	0.000139112
ENSG00000197503	LINC00477	2.3523	4.91409	5.31516	3.0389	10.7678	31.9957	9.15224	19.8274	2.1345	0.593568	-3.59606	0.000323076	0.0035128
ENSG00000215612	HMX1	4.45396	0	2.67341	4.9124	13.5894	15.3373	13.7208	8.13038	2.13317	0.623545	-3.42103	0.000623843	0.00574486
ENSG00000235436	DPY19L2P4	9.34329	8.0743	18.7506	4.91709	29.9982	77.7012	28.9384	122.822	2.1328	0.534521	-3.99012	6.60391e-05	0.00106151
ENSG00000273174	AC108673.2	1.19617	3.89104	1.10341	1.00126	7.36533	6.11979	9.21029	4.42751	2.13267	0.82866	-2.57364	0.0100635	0.0446121
ENSG00000125414	MYH2	0	3.76008	11.822	7.17543	41.2905	18.5308	15.9342	12.1593	2.13086	0.737534	-2.88917	0.00386258	0.02217
ENSG00000169224	GCSAML	23.0749	19.8769	25.5407	31.6147	103.894	130.215	96.9474	97.919	2.12992	0.351097	-6.06647	1.30751e-09	1.50121e-07
ENSG00000250448	AC092335.1	2.1828	2.36862	0	3.96024	7.91267	17.9963	2.676	19.2912	2.12984	0.800051	-2.66212	0.00776491	0.0369872
ENSG00000253223	AC110998.1	3.49379	0	8.41213	4.05519	16.2563	31.2487	6.4504	22.8182	2.12915	0.643927	-3.3065	0.000944695	0.00783946
ENSG00000266450	AC019183.1	2.22927	0	4.12218	6.01507	13.6653	20.4126	8.15794	8.01823	2.12839	0.706051	-3.01449	0.0025741	0.0164387
ENSG00000165480	SKA3	13.2792	6.15014	63.7746	59.3481	146.039	225.629	94.8261	110.524	2.12782	0.59205	-3.59398	0.000325669	0.00353008
ENSG00000286447	AC109782.1	1.01154	0	1.79052	5.62105	15.3465	2.47192	10.8806	10.0924	2.12746	0.8186	-2.5989	0.00935235	0.0422334
ENSG00000236444	UBE2L5	17.1396	18.2155	23.2142	21.2474	51.378	169.291	44.4699	206.18	2.12539	0.47683	-4.45733	8.29867e-06	0.000206171
ENSG00000240790	AC073934.1	3.87496	1.31839	4.63608	0	6.65552	14.4836	10.4752	6.25255	2.12401	0.837547	-2.53599	0.0112131	0.0481924
ENSG00000198797	BRINP2	0.91239	11.7213	12.4846	2.27708	16.4325	49.1843	5.42957	35.2796	2.12278	0.783761	-2.70846	0.0067597	0.0334067
ENSG00000069764	PLA2G10	3.84598	1.27466	3.37318	4.24414	17.1862	19.9295	4.81443	9.8823	2.1226	0.727334	-2.91833	0.00351909	0.0206791
ENSG00000271013	LRRC37A9P	40.8177	28.3149	63.4121	46.6946	142.283	350.996	94.304	312.143	2.12147	0.389052	-5.45292	4.955e-08	3.19225e-06
ENSG00000172426	RSPH9	12.125	3.78083	10.8544	4.04725	42.6716	46.5988	11.1605	70.6814	2.12016	0.481869	-4.39987	1.08315e-05	0.000256225
ENSG00000163749	CCDC158	138.853	119.861	248.827	177.736	657.334	1150.61	425.579	843.569	2.11872	0.331125	-6.39855	1.56861e-10	2.61231e-08
ENSG00000115257	PCSK4	129.946	23.9131	135.722	87.5008	432.247	526.216	255.984	635.332	2.11805	0.42794	-4.9494	7.44418e-07	2.89028e-05
ENSG00000197990	ZNF734P	4.46417	0	6.05325	9.12767	22.2275	32.0073	11.841	11.4291	2.11785	0.618035	-3.42676	0.000610837	0.00565099
ENSG00000177689	MAGEB10	48.1533	19.553	85.4169	65.8261	271.261	270.306	175.519	106.079	2.11776	0.348035	-6.0849	1.16565e-09	1.36764e-07
ENSG00000182652	OR4Q3	1.09354	0	5.95618	9.97861	21.7312	24.0061	11.6977	22.6513	2.11701	0.732453	-2.8903	0.00384869	0.0221061
ENSG00000146216	TTBK1	8.14411	20.1465	39.4846	34.2224	132.965	131.528	69.5955	72.7879	2.11507	0.394379	-5.36303	8.18368e-08	4.79215e-06
ENSG00000142945	KIF2C	63.6955	40.7398	170.196	171.528	524.264	619.077	319.625	717.276	2.11494	0.457137	-4.6265	3.71904e-06	0.000106275
ENSG00000164675	IQUB	53.603	42.4644	77.3507	57.5086	191.866	414.752	147.429	404.231	2.11484	0.345106	-6.1281	8.89369e-10	1.09128e-07
ENSG00000288063	AC099050.1	0	1.24278	5.37695	3.04084	11.2174	12.2037	9.15726	15.1727	2.11479	0.631713	-3.34771	0.000814822	0.0070303
ENSG00000183324	REC114	4.00583	1.41012	20.849	23.4909	38.301	101.116	27.2806	104.513	2.1128	0.621362	-3.40027	0.000673202	0.00608265
ENSG00000259098	AC025884.2	0	6.31266	19.5973	23.0058	95.6867	32.7364	30.9344	31.2084	2.1117	0.732279	-2.88374	0.00392983	0.0224335
ENSG00000265843	LINC01029	5.93463	0.614638	43.2696	28.6526	74.7993	118.545	58.1915	42.9042	2.11142	0.80626	-2.61879	0.00882434	0.0405206
ENSG00000163631	ALB	8.45096	14.5114	19.5912	21.2809	72.929	114.507	26.2418	30.6433	2.10874	0.550682	-3.82932	0.000128497	0.00175596
ENSG00000285822	AC129926.2	2.18881	1.20853	26.0986	17.9648	84.5428	51.471	19.0668	18.4655	2.10675	0.805297	-2.61611	0.00889379	0.0407871
ENSG00000109832	DDX25	89.7848	32.1062	188.037	139.207	405.887	717.724	320.27	790.576	2.1061	0.427774	-4.9234	8.50515e-07	3.2092e-05
ENSG00000288029	AC115282.2	6.58769	2.37254	1.98366	12.0462	22.4043	38.4943	14.411	20.0109	2.10337	0.611941	-3.43721	0.000587737	0.00549175
ENSG00000203690	TCP10L3	31.6642	15.2324	62.469	42.1228	130.19	283.265	82.2582	293.888	2.10261	0.426649	-4.92819	8.29932e-07	3.16873e-05
ENSG00000261697	AC010531.4	10.2229	8.06182	23.6539	11.5349	62.1767	60.9461	52.799	65.4768	2.10136	0.444114	-4.73158	2.22778e-06	7.0845e-05
ENSG00000258947	TUBB3	24.8489	65.1191	72.1525	88.9662	262.029	361.701	187.824	227.271	2.10099	0.394827	-5.3213	1.03026e-07	5.76015e-06
ENSG00000214725	CDIPTOSP	1.22134	1.28412	13.411	5.11117	22.3761	34.2206	12.2077	117.859	2.1009	0.756154	-2.7784	0.00546278	0.028691
ENSG00000064270	ATP2C2	2.15986	8.08397	13.8154	17.3566	49.4418	40.3743	41.6563	39.2688	2.10029	0.73297	-2.86545	0.00416411	0.0234642
ENSG00000135436	FAM186B	21.4375	16.981	34.0315	37.618	111.873	160.997	81.6518	479.655	2.10004	0.418068	-5.02322	5.08127e-07	2.12146e-05
ENSG00000227598	Z94721.1	7.28181	0	4.50883	3.14026	13.228	22.674	12.146	14.7575	2.09834	0.630292	-3.32916	0.000871086	0.00737521
ENSG00000181358	CTAGE10P	1.09484	2.37139	4.94498	1.9914	5.79711	19.0758	9.01005	25.9445	2.09658	0.728926	-2.87625	0.00402425	0.0228936
ENSG00000197992	CLEC9A	7.6964	3.76158	10.6759	4.69043	25.0709	40.6718	18.5516	30.0431	2.09616	0.636171	-3.29497	0.000984337	0.00805203
ENSG00000237766	GGTA2P	5.81643	6.22469	5.27222	2.01666	13.1751	40.1737	8.25732	19.471	2.09602	0.656582	-3.19232	0.00141136	0.0105517
ENSG00000176302	FOXR1	2.23829	1.16346	27.0402	24.0768	70.2068	70.3877	35.9443	29.2516	2.09331	0.729635	-2.86898	0.00411793	0.0232741
ENSG00000284716	AL034417.3	3.35358	2.41345	2.03731	5.06977	12.1232	20.4161	9.11212	6.41183	2.0932	0.760263	-2.75326	0.00590052	0.0302971
ENSG00000255251	PRR23D1	2.37485	1.24682	6.45007	12.2092	27.3334	31.1927	14.7386	17.6877	2.09231	0.65818	-3.17892	0.00147822	0.0108995
ENSG00000230534	AL392046.1	4.5465	3.51254	2.84383	2.19476	12.6907	20.4566	8.68593	28.1087	2.09228	0.649093	-3.22339	0.00126682	0.00971975
ENSG00000248150	LINC02150	0	2.48185	5.29893	3.04764	13.2723	12.9669	9.20595	9.80714	2.09222	0.701195	-2.9838	0.00284696	0.0177303
ENSG00000270816	LINC00221	19.298	16.2061	44.4483	46.3756	149.091	192.08	64.5052	106.023	2.08985	0.417922	-5.00056	5.71628e-07	2.32322e-05
ENSG00000238222	MKRN4P	3.62069	2.50243	18.3467	22.4914	58.1061	64.1767	30.474	25.2346	2.08887	0.56673	-3.68583	0.00022796	0.00268639
ENSG00000185304	RGPD2	344.33	56.0504	276.765	436.97	1097.56	2184.25	274.951	847.51	2.08884	0.652009	-3.2037	0.00135675	0.0102459
ENSG00000277738	AC126175.2	3.61373	1.30028	25.4034	18.4802	41.6322	83.0031	32.7715	26.7526	2.08873	0.763462	-2.73587	0.00622163	0.0314893
ENSG00000179299	NSUN7	83.9624	25.0932	44.2255	53.6538	219.518	320.929	101.984	272.476	2.08831	0.420301	-4.96861	6.74344e-07	2.65998e-05
ENSG00000186871	ERCC6L	7.53832	5.83731	22.0174	19.543	58.6952	73.7864	45.577	32.6091	2.08688	0.414716	-5.03207	4.85211e-07	2.0417e-05
ENSG00000198901	PRC1	98.4931	103.002	193.773	152.56	658.594	772.318	333.719	436.059	2.08569	0.297688	-7.00631	2.44694e-12	7.71218e-10
ENSG00000008405	CRY1	258.605	253.826	478.893	280.004	1409.95	1810.45	829.556	830.32	2.08557	0.290293	-7.18437	6.75168e-13	2.59993e-10
ENSG00000168078	PBK	7.48174	8.00808	61.5509	21.9276	75.5637	176.661	60.4598	350.298	2.08339	0.607955	-3.42688	0.000610563	0.00565008
ENSG00000105376	ICAM5	50.1535	8.92455	13.5527	12.7078	98.4988	98.735	66.3147	63.681	2.08219	0.628141	-3.31485	0.000916907	0.00767623
ENSG00000232684	ATP11A-AS1	3.61192	2.52994	3.2348	2.04291	13.5113	14.2819	8.36622	17.506	2.08139	0.66715	-3.11983	0.00180958	0.0126329
ENSG00000170959	DCDC1	64.525	60.2531	125.49	165.263	327.206	738.306	254.052	386.322	2.08116	0.393444	-5.28959	1.22588e-07	6.6796e-06
ENSG00000216359	AL139039.1	2.34486	2.51492	6.46496	3.01907	20.4205	14.5072	11.0221	7.57047	2.08088	0.720695	-2.88733	0.00388528	0.0222558
ENSG00000279475	AC087894.2	1.22853	1.35066	18.4868	5.03493	34.4825	35.2999	13.8657	11.7885	2.0804	0.794555	-2.61833	0.00883623	0.0405578
ENSG00000204832	ST8SIA6-AS1	35.8144	25.7162	36.11	39.6292	145.727	193.467	98.9795	107.691	2.08031	0.287659	-7.23184	4.76487e-13	1.939e-10
ENSG00000224273	AC005077.2	3.61569	5.21887	24.2323	14.2906	53.3878	67.3046	31.9449	37.1335	2.08019	0.512145	-4.06173	4.87114e-05	0.000834741
ENSG00000187942	LDLRAD2	0.777767	10.817	19.2254	4.4506	42.7321	27.5541	27.8728	19.9648	2.07995	0.631861	-3.29179	0.000995531	0.00812912
ENSG00000168658	VWA3B	13.2169	11.7921	50.18	42.2297	141.98	163.096	66.9961	458.999	2.07971	0.55302	-3.76064	0.000169476	0.00216114
ENSG00000260683	AL591643.1	9.25902	7.39385	26.1351	23.428	72.2228	91.2013	48.5054	28.9496	2.07928	0.548658	-3.78976	0.000150791	0.00198592
ENSG00000166578	IQCD	39.6535	17.1575	28.8653	10.8602	90.7937	154.294	56.9433	215.554	2.07675	0.414072	-5.01545	5.29108e-07	2.19481e-05
ENSG00000206192	ANKRD20A9P	16.9128	10.0587	71.9962	77.048	174.045	324.844	60.2273	274.597	2.07655	0.647188	-3.20857	0.00133397	0.0101047
ENSG00000184368	MAP7D2	112.976	67.7153	275.288	224.165	725.77	979.119	448.072	376.557	2.07383	0.397144	-5.22185	1.77142e-07	9.02499e-06
ENSG00000230314	ELOVL2-AS1	8.53247	15.7945	46.4731	41.6031	102.022	171.682	83.2342	140.066	2.07159	0.471032	-4.39798	1.09263e-05	0.000257709
ENSG00000178217	SH2D4B	3.16163	10.9095	11.1193	14.3806	53.66	24.7763	46.1417	20.1314	2.06751	0.467246	-4.42488	9.64939e-06	0.000233767
ENSG00000156269	NAA11	6.40927	7.95015	83.1231	80.6361	219.567	224.808	117.579	135.193	2.06744	0.669541	-3.08785	0.00201607	0.0136909
ENSG00000127423	AUNIP	27.2092	33.4239	85.695	77.9235	243.417	335.197	130.191	161.435	2.06744	0.395783	-5.22367	1.75409e-07	8.9794e-06
ENSG00000243710	CFAP57	11.7802	9.77925	117.979	101.145	267.526	327.386	155.867	289.418	2.06694	0.660128	-3.13113	0.00174138	0.0122767
ENSG00000180537	RNF182	9.92432	8.34606	48.9702	52.7001	124.335	185.279	70.7549	81.5801	2.06609	0.576029	-3.58679	0.00033478	0.00361521
ENSG00000115163	CENPA	6.03396	2.18539	23.702	16.4788	61.6878	66.7287	25.9063	27.6075	2.06474	0.612494	-3.37104	0.000748849	0.00659561
ENSG00000231473	RB1-DT	9.29444	13.0694	11.8658	32.5644	77.8458	81.3851	37.0803	51.7572	2.06464	0.483516	-4.27007	1.95416e-05	0.000413305
ENSG00000223393	AL118511.1	8.13951	1.11171	3.27996	2.06741	20.0102	21.038	3.31547	19.6448	2.06288	0.754412	-2.73442	0.00624898	0.0315918
ENSG00000196155	PLEKHG4	237.011	273.143	538.147	460.809	1816.14	1981.28	930.535	1026.4	2.06153	0.296295	-6.9577	3.45881e-12	1.01548e-09
ENSG00000257842	LINC02588	7.68988	9.49417	19.4699	2.26543	20.3923	73.4904	26.3885	96.4327	2.05913	0.535725	-3.84363	0.000121229	0.00168131
ENSG00000215029	TCP11X2	1.35222	4.34615	14.2405	12.4236	34.0243	41.3834	29.4015	21.7877	2.05776	0.579722	-3.54957	0.000385862	0.00401837
ENSG00000129355	CDKN2D	26.0672	25.8218	56.4318	41.7862	192.895	156.848	120.779	159.031	2.05729	0.272162	-7.55906	4.06003e-14	2.39053e-11
ENSG00000251273	LINC02228	4.42902	9.86189	24.3166	20.4133	56.9534	107.995	26.0801	87.3834	2.0565	0.550184	-3.73783	0.000185613	0.00230657
ENSG00000138778	CENPE	127.247	87.6675	264.541	281.266	609.882	1209.3	560.996	445.186	2.05577	0.375451	-5.47545	4.36392e-08	2.86309e-06
ENSG00000269504	AC003973.1	1.83127	3.80708	13.5054	11.7511	37.8013	30.5213	28.8068	70.303	2.05509	0.66942	-3.06996	0.0021409	0.0143297
ENSG00000070985	TRPM5	1.37897	1.37342	6.94199	6.57934	24.8988	16.8777	10.7941	12.1921	2.05486	0.601208	-3.41789	0.000631095	0.00579174
ENSG00000261127	AC133548.2	12.9805	3.66044	64.5001	70.354	192.907	206.137	75.3928	195.242	2.05477	0.669471	-3.06924	0.00214605	0.0143522
ENSG00000173898	SPTBN2	180.601	114.601	654.856	627.456	2255.04	1624.03	1014.66	2066.08	2.04975	0.492919	-4.15839	3.20499e-05	0.000604659
ENSG00000189275	LINC01164	0	2.5376	2.60849	8.31076	22.3623	14.0057	6.60178	9.69029	2.04884	0.743565	-2.75542	0.00586165	0.0301568
ENSG00000249226	SUCLG2P4	7.79021	1.21044	2.02636	1.9888	8.87128	18.769	12.6027	9.06151	2.04869	0.655596	-3.12493	0.00177845	0.0124598
ENSG00000066923	STAG3	460.73	528.246	1104.17	599.296	3395.45	3151.74	1809.67	2214.78	2.04863	0.285184	-7.18353	6.79339e-13	2.59993e-10
ENSG00000287409	AC004936.1	0	0	7.94708	3.93638	4.81677	23.112	10.8017	17.5162	2.0476	0.782429	-2.61698	0.00887108	0.0406953
ENSG00000187682	ERAS	2.0265	7.03911	3.60285	2.52349	17.8972	16.1997	9.53303	7.8141	2.04668	0.702005	-2.91548	0.00355138	0.0208263
ENSG00000117477	CCDC181	33.1765	23.2637	43.1709	36.1503	110.367	234.481	78.5849	183.344	2.0461	0.355679	-5.75264	8.78608e-09	7.63392e-07
ENSG00000121211	MND1	12.1202	11.8175	39.529	37.9439	126.516	132.531	58.6173	66.2269	2.0458	0.58664	-3.48731	0.000487897	0.00478344
ENSG00000267465	AC011525.2	1.83801	0	7.06581	3.28455	9.96476	24.074	8.02905	49.3426	2.04561	0.602654	-3.39434	0.000687937	0.0061897
ENSG00000164778	EN2	13.0995	2.43084	13.721	3.16552	40.3156	39.226	21.2183	23.0155	2.04477	0.552145	-3.70333	0.000212791	0.00255254
ENSG00000274422	AC245060.5	462.353	420.493	877.887	1271.28	3794.71	4695.98	889.043	1554.19	2.04388	0.515438	-3.96532	7.32964e-05	0.00114552
ENSG00000253868	FER1L6-AS2	3.92866	2.48697	32.731	49.4416	70.871	133.737	68.238	94.7126	2.04358	0.733497	-2.78607	0.00533509	0.0282236
ENSG00000163467	TSACC	5.98566	4.87044	27.5453	11.0432	33.6837	96.7725	22.1258	830.851	2.0415	0.580566	-3.51639	0.000437456	0.00441827
ENSG00000264570	SNX19P3	15.2312	1.23917	27.6424	68.0024	160.384	137.759	49.6126	51.8629	2.03943	0.724393	-2.81537	0.0048721	0.0262888
ENSG00000223831	AC005006.1	4.81622	2.64112	19.6797	17.6506	55.9144	61.6559	22.4947	21.1284	2.03937	0.607626	-3.35629	0.000789959	0.00686366
ENSG00000242866	STRC	94.3586	53.8631	105.945	86.8907	379.926	433.243	237.242	297.749	2.03773	0.257497	-7.91363	2.49991e-15	2.43537e-12
ENSG00000224888	AC138028.2	27.1889	38.8595	35.2236	26.2853	164.079	126.32	100.239	65.3811	2.03747	0.342413	-5.95034	2.67588e-09	2.73093e-07
ENSG00000146670	CDCA5	34.493	29.3565	123.981	95.3502	307.165	375.363	198.276	348.415	2.03721	0.413451	-4.92734	8.33569e-07	3.17636e-05
ENSG00000232021	LEF1-AS1	19.5749	31.7597	25.2347	28.076	115.043	143.994	61.7626	209.86	2.0367	0.283022	-7.19627	6.18832e-13	2.45608e-10
ENSG00000286731	AP001360.2	4.81011	7.58529	22.8447	18.3147	20.0658	125.7	20.3479	34.4879	2.03661	0.732117	-2.78181	0.00540569	0.0284702
ENSG00000285373	LINC02478	7.7608	9.57617	14.3585	6.77507	49.5647	41.7158	27.2652	60.4297	2.03492	0.40633	-5.00805	5.49852e-07	2.26624e-05
ENSG00000189134	NKAPL	30.5784	30.1574	49.777	51.7775	175.981	237.187	87.6077	185.803	2.03287	0.365832	-5.55684	2.74707e-08	1.99352e-06
ENSG00000249642	AC097521.1	1.9756	0.888702	12.3488	6.8796	27.1483	31.5016	8.59532	57.6209	2.03081	0.623495	-3.25714	0.0011254	0.00889282
ENSG00000135451	TROAP	25.0906	14.179	56.6069	46.4704	182.561	181.298	76.0217	193.021	2.0303	0.418907	-4.84667	1.25549e-06	4.43046e-05
ENSG00000260830	AL135744.1	3.78674	1.31241	3.36762	1.02769	7.15161	16.0004	5.65463	19.044	2.02976	0.659463	-3.07791	0.00208461	0.0140406
ENSG00000159625	DRC7	10.8698	9.27787	50.2026	10.3415	46.035	186.437	19.2445	321.201	2.02891	0.721307	-2.81283	0.00491082	0.0264532
ENSG00000214794	KRT18P42	2.43978	0	5.5178	9.12607	29.6316	16.4952	7.48563	9.409	2.02865	0.735499	-2.7582	0.00581213	0.0299522
ENSG00000231171	LINC01098	7.24108	5.56235	10.2069	15.715	38.4936	56.1368	24.8718	29.1218	2.02782	0.497936	-4.07246	4.65202e-05	0.000804802
ENSG00000263105	AC009171.2	2.53389	0	7.18517	1.0365	10.8246	13.1949	8.50657	7.2265	2.02735	0.743422	-2.72706	0.00639023	0.032114
ENSG00000043355	ZIC2	5.4098	6.91065	14.0361	2.99268	23.9422	25.6355	37.5341	39.7837	2.02722	0.569304	-3.56087	0.000369628	0.00388581
ENSG00000257489	AC010203.1	11.7339	6.33697	10.7222	12.5351	34.9036	66.1361	26.7356	72.1977	2.02684	0.413377	-4.90314	9.43169e-07	3.51344e-05
ENSG00000227145	IL21-AS1	4.84357	5.5383	11.0532	28.6648	60.6894	68.2249	27.439	40.0541	2.02535	0.562746	-3.59905	0.000319388	0.00348411
ENSG00000258028	AL135878.1	1.89365	3.72678	24.983	25.1679	61.9145	72.3635	36.2797	48.0391	2.02404	0.68903	-2.93753	0.00330841	0.0198024
ENSG00000236963	LINC01141	0.637389	4.19899	6.89475	2.85255	19.9835	13.7914	10.5416	25.8246	2.0226	0.694891	-2.91067	0.00360652	0.0210537
ENSG00000144485	HES6	33.9505	36.1116	75.5529	31.4834	264.516	93.4743	180.808	117.555	2.02152	0.376374	-5.37102	7.82904e-08	4.63495e-06
ENSG00000163923	RPL39L	25.5011	46.2171	74.1011	54.6251	157.522	343.281	111.748	276.634	2.02091	0.388733	-5.19871	2.00674e-07	9.94032e-06
ENSG00000197653	DNAH10	52.4837	26.8173	367.014	201.309	682.639	935.998	347.919	831.45	2.02078	0.616289	-3.27895	0.00104194	0.00842883
ENSG00000198178	CLEC4C	15.0576	11.3256	29.3648	28.2414	127.196	70.9119	58.0868	39.5236	2.01994	0.406977	-4.96327	6.93152e-07	2.70759e-05
ENSG00000184735	DDX53	13.9935	4.73489	62.3279	57.3125	163.148	180.891	79.3736	81.0111	2.01964	0.612148	-3.29927	0.000969361	0.00796397
ENSG00000279605	AC067930.5	2.53797	2.58396	8.9052	8.30487	31.6168	29.5041	8.5532	57.3751	2.01705	0.526185	-3.83334	0.000126415	0.00173304
ENSG00000073146	MOV10L1	148.983	129.362	380.711	330.785	1117.23	1245.59	651.267	737.71	2.01634	0.362255	-5.56608	2.60533e-08	1.89923e-06
ENSG00000240204	SMKR1	4.65648	3.66314	13.6892	10.2547	38.9646	32.7308	27.4125	226.216	2.0146	0.589526	-3.41732	0.000632403	0.00580208
ENSG00000197213	ZSCAN5B	3.32007	12.0638	21.9264	18.8715	66.8603	69.4913	39.212	29.1545	2.01439	0.468767	-4.29721	1.72963e-05	0.000376723
ENSG00000203772	SPRN	8.87923	6.35298	7.87255	3.18291	20.6973	48.1505	10.4211	33.66	2.01416	0.686126	-2.93555	0.00332955	0.0198755
ENSG00000198010	DLGAP2	13.8349	8.74681	139.924	132.737	273.391	420.649	191.76	381.522	2.01407	0.672929	-2.99299	0.00276256	0.017357
ENSG00000253626	EIF5AL1	20.4964	18.2151	20.5139	14.0987	37.3881	150.51	34.5434	243.789	2.01385	0.510799	-3.94256	8.06169e-05	0.00123178
ENSG00000259458	MGC15885	0	0	9.07547	7.58644	13.8114	22.9794	13.8321	9.09336	2.0138	0.755424	-2.66579	0.00768088	0.0366793
ENSG00000237232	ZNF295-AS1	10.7977	12.097	16.7778	12.1341	37.3564	70.0792	51.1516	105.612	2.01348	0.448757	-4.4868	7.23019e-06	0.000184799
ENSG00000184388	PABPC1L2B	2.40287	1.22707	9.64298	8.40553	24.0035	27.7848	15.6827	14.2048	2.01313	0.573288	-3.51155	0.000445498	0.00447934
ENSG00000249346	LINC01016	105.705	66.164	155.988	80.623	387.727	613.073	234.403	961.311	2.01189	0.384479	-5.23276	1.67002e-07	8.61761e-06
ENSG00000278811	LINC00624	21.1281	16.9924	240.737	94.9788	234.472	689.079	209.137	213.582	2.01183	0.710782	-2.83045	0.00464824	0.025379
ENSG00000164045	CDC25A	79.0332	49.0029	198.977	163.319	571.98	597.308	314.448	340.167	2.01147	0.382283	-5.26173	1.42704e-07	7.62068e-06
ENSG00000184139	RPL7AP28	2.37798	0	2.18242	2.0122	7.49571	10.2043	2.76956	22.8135	2.01101	0.760794	-2.64331	0.00820999	0.0384688
ENSG00000174844	DNAH12	39.1209	33.0739	95.763	169.875	265.815	551.276	201.887	446.035	2.00856	0.53603	-3.74711	0.000178885	0.00224728
ENSG00000261182	AL596211.1	3.84381	1.09684	3.48897	15.6114	23.0378	25.5806	24.1398	12.2943	2.00684	0.646721	-3.1031	0.00191507	0.0131663
ENSG00000111247	RAD51AP1	21.9356	26.6906	35.5825	51.8863	103.727	232.943	77.8477	125.842	2.00612	0.383236	-5.23468	1.65269e-07	8.55568e-06
ENSG00000146215	CRIP3	26.451	11.8542	20.8144	8.52221	54.3565	106.907	41.4014	110.557	2.00427	0.430844	-4.65195	3.28815e-06	9.69792e-05
ENSG00000228218	ATF4P3	4.8861	0	5.55754	8.18696	20.411	22.6896	14.1035	11.0514	2.00395	0.655455	-3.05734	0.00223309	0.014805
ENSG00000205634	LINC00898	1.27144	0	10.8713	10.7084	17.6311	43.657	10.3055	60.4821	2.00385	0.678929	-2.95149	0.00316242	0.0191374
ENSG00000287261	AL139243.1	3.66339	8.98762	5.46803	5.11988	15.7671	40.62	13.1454	39.7091	2.00297	0.53327	-3.75601	0.000172643	0.00218768
ENSG00000223611	SUPT20HL2	32.9139	46.7085	113.539	88.6199	356.32	289.425	204.36	139.881	2.00095	0.349665	-5.72249	1.04973e-08	8.90418e-07
ENSG00000173093	CCDC63	0	3.25585	9.01281	11.7015	29.076	26.3823	16.2707	76.5141	2.00057	0.723597	-2.76475	0.00569663	0.0295427
ENSG00000102098	SCML2	175.193	129.413	330.548	187.665	877.315	1004.1	591.21	399.828	2.00027	0.275998	-7.24738	4.24899e-13	1.75124e-10
ENSG00000228966	HOMER2P1	2.50736	0	6.72019	3.08153	15.1527	17.4708	4.72238	18.8289	1.99753	0.769154	-2.59704	0.00940297	0.0423965
ENSG00000196091	MYBPC1	2.6734	4.82979	12.05	12.135	40.9083	40.3525	15.7945	55.0189	1.99738	0.601962	-3.31812	0.000906262	0.00761487
ENSG00000130427	EPO	0	1.28786	4.56124	3.25907	11.1575	6.94144	9.55443	4.45359	1.99687	0.770541	-2.59152	0.00955524	0.0429265
ENSG00000249196	TMEM132D-AS1	6.80616	0.745006	24.2721	17.5294	57.4739	61.6083	22.5064	27.071	1.99612	0.77393	-2.5792	0.00990289	0.0440878
ENSG00000141161	UNC45B	8.39089	4.93495	4.20957	4.70401	30.2618	22.0219	14.8118	20.377	1.9961	0.559817	-3.56563	0.000362986	0.00383732
ENSG00000150667	FSIP1	15.248	19.1379	33.9728	37.2401	101.265	165.323	51.7525	119.665	1.9951	0.494371	-4.03563	5.44566e-05	0.000910386
ENSG00000254826	AP001922.3	0	0	6.54801	6.10781	13.5999	15.4927	10.1777	12.4654	1.99487	0.728089	-2.73987	0.00614633	0.0312103
ENSG00000277693	AP003900.1	25.0673	26.7949	172.213	68.6855	278.735	311.77	284.31	233.166	1.994	0.575228	-3.46644	0.000527391	0.00507141
ENSG00000105889	STEAP1B	30.3017	19.7135	41.2524	46.4163	161.683	176.978	78.1438	84.7533	1.99092	0.340546	-5.84627	5.02732e-09	4.7675e-07
ENSG00000196876	SCN8A	79.4489	70.9136	235.339	310.798	904.496	584.476	588.216	327.918	1.98909	0.407322	-4.88333	1.04311e-06	3.82369e-05
ENSG00000233585	AC231533.2	7.48102	8.93399	13.4434	14.142	50.8828	49.9082	30.1308	20.5461	1.98904	0.420125	-4.73439	2.1971e-06	7.00718e-05
ENSG00000238133	MAP3K20-AS1	6.70888	2.06823	39.9216	53.2684	98.1445	122.565	82.304	44.5565	1.98769	0.716625	-2.77369	0.00554247	0.0289864
ENSG00000287823	AL603783.1	3.42495	2.60781	4.43236	3.52002	22.4182	13.1188	7.0204	7.49994	1.98754	0.781552	-2.54307	0.0109884	0.0474746
ENSG00000130829	DUSP9	8.25088	3.04516	16.323	21.9892	57.0848	57.0629	31.9403	25.3223	1.9847	0.51397	-3.8615	0.000112693	0.00158827
ENSG00000258317	AC034102.6	0.826099	4.4189	0	3.57264	9.59819	10.2857	5.15916	11.0937	1.98355	0.729469	-2.71917	0.00654463	0.03265
ENSG00000101306	MYLK2	4.63027	5.90992	12.7384	10.0142	46.5531	37.9094	15.2003	17.1973	1.98184	0.547388	-3.62054	0.00029399	0.00327371
ENSG00000138180	CEP55	28.1043	17.606	38.5526	41.0254	139.626	174.212	63.6737	139.65	1.98064	0.400807	-4.94162	7.74758e-07	2.98287e-05
ENSG00000235824	LINC00837	14.9857	10.5337	38.9784	30.42	75.5141	164.189	47.3784	220.367	1.97927	0.47789	-4.14169	3.44752e-05	0.000639531
ENSG00000279641	AC120057.3	3.7619	1.27586	9.97142	6.2976	22.0295	25.3817	16.9001	12.3783	1.97876	0.605681	-3.26701	0.0010869	0.00866179
ENSG00000271888	AL136162.1	2.34894	2.46172	4.25324	4.16117	11.6545	17.9502	10.0715	9.0552	1.97646	0.657599	-3.00558	0.00265076	0.0168231
ENSG00000169607	CKAP2L	31.5486	32.6522	89.6512	194.428	308.715	527.713	183.66	244.34	1.97623	0.518563	-3.81097	0.000138424	0.00185651
ENSG00000218823	PAPOLB	44.1296	26.8219	53.3006	32.5668	148.439	207.375	108.698	420.875	1.97516	0.369463	-5.34604	8.98974e-08	5.16998e-06
ENSG00000274376	ADAMTS7P1	11.7949	7.83574	40.4747	34.6621	84.3241	136.979	56.8221	78.9603	1.97505	0.472428	-4.18064	2.90693e-05	0.000560936
ENSG00000103375	AQP8	1.21263	1.2536	3.23036	1.99258	7.19628	6.32851	9.52561	5.08548	1.97467	0.769162	-2.5673	0.0102493	0.0451486
ENSG00000278416	PMS2P2	18.6357	14.182	2.21074	3.10751	34.2577	51.7385	24.4364	22.6953	1.97428	0.646406	-3.05425	0.00225625	0.0149032
ENSG00000264397	MIR3180-5	5.04629	2.83338	3.7748	3.18906	23.2747	12.1953	8.08996	7.6231	1.97243	0.660026	-2.98842	0.00280426	0.0175357
ENSG00000164109	MAD2L1	69.4881	58.8248	100.146	85.0036	251.994	430.51	241.678	220.292	1.97184	0.242455	-8.13282	4.19422e-16	4.81556e-13
ENSG00000165244	ZNF367	18.8514	27.1952	52.7685	35.9209	112.751	199.354	87.0795	141.066	1.97109	0.360325	-5.47031	4.49259e-08	2.93394e-06
ENSG00000137261	KIAA0319	11.2398	16.5156	36.6609	40.0685	120.819	136.834	52.2064	62.6026	1.96904	0.446695	-4.40801	1.04322e-05	0.000248228
ENSG00000219682	AL133268.1	3.48999	0	4.18398	5.04574	10.5784	20.5379	7.3493	6.85897	1.96844	0.731184	-2.69212	0.00709991	0.0345516
ENSG00000284906	AC091057.5	1.4548	0	21.7219	11.5671	36.1905	50.5839	16.3847	39.7176	1.96759	0.728314	-2.70158	0.00690118	0.0338923
ENSG00000166351	POTED	16.9318	4.81919	100.214	104.734	192.162	405.672	68.7272	235.843	1.96691	0.749279	-2.62507	0.00866311	0.0399744
ENSG00000265688	MAFG-DT	15.3675	24.1632	24.9085	17.0505	84.443	111.601	42.7446	61.368	1.96593	0.35301	-5.56906	2.56123e-08	1.87987e-06
ENSG00000215784	FAM72D	0	14.4477	27.1551	18.1567	91.763	25.0577	59.1801	37.4725	1.96468	0.732961	-2.68048	0.00735176	0.0354925
ENSG00000287225	Z84468.2	1.01998	5.22207	3.69767	3.5331	8.79305	17.8474	13.5527	5.95117	1.96273	0.690573	-2.84218	0.00448067	0.0247372
ENSG00000164651	SP8	2.36107	1.11706	6.84454	6.18215	14.4134	24.8334	11.8719	10.7719	1.9627	0.623188	-3.14945	0.0016358	0.0117436
ENSG00000286952	AC093928.1	3.31397	1.19009	10.0115	6.94859	26.9944	31.9089	5.39365	11.8859	1.96207	0.712796	-2.75264	0.00591169	0.0303371
ENSG00000283709	FAM238C	67.8875	38.0327	114.391	22.1955	133.553	441.989	133.068	1145.3	1.96124	0.554941	-3.53414	0.00040911	0.0042006
ENSG00000142731	PLK4	71.6944	18.2789	135.23	148.718	326.044	543.254	218.591	299.321	1.95816	0.489181	-4.00293	6.25624e-05	0.00101247
ENSG00000174145	NWD2	4.4846	3.58415	11.1007	11.0478	28.4651	48.9981	12.6028	14.791	1.95809	0.554597	-3.53065	0.000414534	0.00424139
ENSG00000185823	NPAP1	144.248	153.876	274.298	217.076	814.846	994.086	496.126	488.01	1.95797	0.267572	-7.31754	2.52552e-13	1.09717e-10
ENSG00000158246	TENT5B	21.5919	11.4827	37.9836	32.3743	122.361	124.238	57.5399	77.4469	1.95756	0.366295	-5.34422	9.08068e-08	5.21296e-06
ENSG00000229613	LINC01501	2.8181	2.7776	4.92701	2.42875	7.71999	26.1316	4.62056	32.7219	1.95737	0.681844	-2.8707	0.00409566	0.023189
ENSG00000266296	ARIH2P1	0	1.24988	8.54123	7.07538	21.844	15.8529	12.9247	8.36798	1.9564	0.695965	-2.81106	0.00493787	0.0265767
ENSG00000254480	LINC02749	2.1162	3.40944	2.92468	2.70215	4.26448	21.0737	7.42036	7.92786	1.95575	0.726661	-2.69142	0.00711494	0.0346143
ENSG00000235790	PEF1-AS1	2.27661	4.13791	2.25552	3.21942	7.60578	16.9345	10.0424	18.5202	1.95528	0.61447	-3.18207	0.00146228	0.0108151
ENSG00000227011	LINC02876	5.14605	0	15.8908	16.7667	38.5556	52.956	21.6925	28.1912	1.95396	0.637601	-3.06455	0.00217996	0.0145428
ENSG00000157851	DPYSL5	30.9356	38.6526	92.8234	43.5078	173.735	248.095	170.426	124.229	1.95128	0.366283	-5.32724	9.97181e-08	5.61425e-06
ENSG00000232944	AC092423.1	2.41568	2.76616	7.0975	9.08074	27.7542	21.4916	14.2638	12.7323	1.94867	0.635987	-3.06401	0.00218392	0.0145601
ENSG00000236303	LINC02646	5.9709	7.39366	27.3078	33.584	80.4475	90.5668	46.9988	46.9982	1.94862	0.472658	-4.12268	3.74488e-05	0.000682484
ENSG00000197320	AC060834.1	0	7.68078	6.63745	2.0738	18.1702	20.2117	8.44625	12.4797	1.94847	0.674864	-2.8872	0.00388689	0.0222558
ENSG00000101188	NTSR1	1.68266	1.1938	4.19623	5.89573	19.1698	11.025	8.79972	6.41671	1.94519	0.688648	-2.82466	0.00473315	0.0257377
ENSG00000272281	TPTE2P2	52.2315	46.065	222.191	176.916	523.153	544.545	365.831	369.682	1.94505	0.465366	-4.17962	2.92002e-05	0.000562786
ENSG00000251533	LINC00605	5.7636	1.21381	11.4661	16.0982	43.7903	39.3273	19.0082	21.3021	1.94361	0.526703	-3.69014	0.000224134	0.00265102
ENSG00000262772	LINC01977	64.5614	48.8761	91.2992	56.0125	210.952	337.324	205.736	129.484	1.94312	0.26513	-7.32893	2.32003e-13	1.03589e-10
ENSG00000223774	AL513217.1	6.41305	2.79203	4.79873	3.25668	16.798	18.5363	14.4402	10.8236	1.94294	0.562569	-3.4537	0.000552958	0.00525465
ENSG00000186280	KDM4D	30.2076	29.2687	71.8586	66.4703	172.117	304.484	96.6244	365.818	1.94197	0.412862	-4.70367	2.5552e-06	7.94436e-05
ENSG00000229967	MAGEA4-AS1	0	1.81737	9.58999	11.4513	27.5598	21.2875	20.2284	8.94557	1.94125	0.725814	-2.67458	0.00748222	0.0359314
ENSG00000181433	SAGE1	11.2872	3.60899	49.4092	68.8839	159.108	141.623	84.9276	70.0393	1.93971	0.667313	-2.90675	0.00365201	0.0212459
ENSG00000155495	MAGEC1	47.28	32.6624	296.237	235.32	687.279	733.106	339.585	251.67	1.93868	0.609299	-3.18182	0.00146353	0.0108181
ENSG00000129204	USP6	199.421	192.002	790.532	681.622	2067.56	2163.75	1126.25	1222.68	1.9369	0.425169	-4.55559	5.22388e-06	0.000139948
ENSG00000286176	AC116317.1	9.00404	5.99465	79.1819	37.4334	159.872	151.071	68.8334	56.4103	1.93615	0.639912	-3.02564	0.00248104	0.0160226
ENSG00000128228	SDF2L1	60.4919	41.6907	68.5946	28.2208	186.418	215.088	167.866	111.899	1.93588	0.315973	-6.12675	8.96942e-10	1.09638e-07
ENSG00000179468	OR9A2	2.25176	3.63595	5.10132	4.98169	18.4489	19.2576	8.94668	9.33913	1.93571	0.634658	-3.05001	0.00228835	0.0150719
ENSG00000255139	AP000442.1	4.91943	1.52566	3.47808	3.31318	11.8173	12.3805	15.1659	20.569	1.93468	0.632386	-3.05933	0.00221835	0.0147468
ENSG00000182901	RGS7	13.1572	2.56534	34.4608	59.3015	122.513	136.508	58.2841	57.558	1.9338	0.624702	-3.09556	0.00196441	0.0134226
ENSG00000177679	SRRM3	27.5422	30.3458	30.4299	31.7698	135.984	137.722	71.9979	75.3322	1.93293	0.296492	-6.51932	7.06262e-11	1.29742e-08
ENSG00000254518	LINC02750	8.88322	6.54895	33.9234	30.7721	103.252	89.233	39.2378	61.8693	1.92761	0.490561	-3.9294	8.51566e-05	0.0012889
ENSG00000282692	AC129915.3	4.71784	1.24668	8.5743	10.0774	24.6195	32.5205	15.5476	25.8991	1.92733	0.480528	-4.01085	6.05012e-05	0.000985911
ENSG00000122952	ZWINT	45.0361	52.8077	122.985	129.996	366.597	433.282	203.321	276.771	1.92534	0.3645	-5.28213	1.27691e-07	6.92245e-06
ENSG00000222012	AC005481.1	12.1466	12.5774	27.9904	36.8745	91.0703	113.288	54.1454	58.3557	1.92474	0.406433	-4.73569	2.18316e-06	6.99742e-05
ENSG00000152192	POU4F1	6.93488	4.83667	24.7797	17.5447	49.9703	68.809	37.357	27.5055	1.92228	0.494593	-3.8866	0.000101658	0.00147473
ENSG00000225813	AC009299.1	18.5688	32.7213	40.7716	30.2253	101.732	180.569	65.4741	101.189	1.92186	0.660605	-2.90925	0.00362298	0.0211191
ENSG00000255931	AP003108.1	13.1194	8.34349	9.25667	9.68217	31.0184	46.0785	35.1312	26.8173	1.92161	0.424974	-4.52171	6.13428e-06	0.00016059
ENSG00000277879	AL391988.1	13.4764	8.4932	8.11832	9.01912	41.2821	35.4165	34.2556	20.991	1.92079	0.368386	-5.21407	1.84737e-07	9.35263e-06
ENSG00000249637	AC008438.1	11.1093	12.5645	4.19591	1.56374	35.5782	27.7421	14.24	23.9698	1.92056	0.51839	-3.70485	0.00021152	0.00254394
ENSG00000215515	IFIT1P1	2.23231	1.20927	5.06081	1.99714	13.1146	11.0912	6.33357	6.67395	1.92041	0.748582	-2.5654	0.0103057	0.04531
ENSG00000186513	OR9Q2	3.19131	1.93173	4.84789	3.27904	6.87086	22.9316	7.58181	8.47346	1.91989	0.752243	-2.55222	0.0107038	0.04657
ENSG00000233080	LINC01399	0.781093	0.827336	10.9386	15.0166	25.8143	30.1475	19.0849	14.5428	1.91951	0.752806	-2.5498	0.0107783	0.0467804
ENSG00000180777	ANKRD30B	23.3413	32.6645	110.639	79.8765	100.087	533.331	66.1683	779.888	1.91921	0.615542	-3.11792	0.00182133	0.0126797
ENSG00000161036	LRWD1	165.865	192.54	327.233	213.012	896.358	1147	502.895	2329.65	1.91813	0.328555	-5.83807	5.28096e-09	4.94963e-07
ENSG00000133640	LRRIQ1	41.8551	33.2933	107.308	154.648	351.042	422.028	186.102	359.519	1.91741	0.431728	-4.44124	8.94437e-06	0.000219835
ENSG00000149926	TLCD3B	74.137	41.0263	106.78	57.0237	260.739	381.387	148.928	582.177	1.91686	0.318327	-6.02165	1.72647e-09	1.87478e-07
ENSG00000162782	TDRD5	30.63	28.0188	157.836	177.326	369.603	535.72	213.329	384.211	1.91677	0.52633	-3.64176	0.000270783	0.00307929
ENSG00000113430	IRX4	0	2.67985	8.5127	3.06185	12.5163	10.5259	18.0369	9.3078	1.91571	0.732503	-2.61529	0.00891508	0.0408358
ENSG00000287133	AC007279.1	5.21831	4.56767	8.48162	14.7257	29.8588	44.5062	20.9246	29.2768	1.91533	0.477287	-4.01296	5.99625e-05	0.000980506
ENSG00000276368	H2AC14	18.4489	13.32	79.1465	90.6935	173.041	213.995	187.08	122.624	1.91464	0.516312	-3.7083	0.000208654	0.00251889
ENSG00000076382	SPAG5	162.074	177.337	316.763	302.29	1061.3	1213.14	452.03	993.742	1.91462	0.323668	-5.91537	3.31132e-09	3.30597e-07
ENSG00000249738	AC008691.1	9.47228	6.70955	27.2313	9.07579	55.0541	64.7537	24.2857	78.9181	1.91366	0.565224	-3.38568	0.000710032	0.00634411
ENSG00000112742	TTK	41.0921	29.2341	168.872	176.31	415.031	542.013	221.039	434.635	1.91221	0.506256	-3.77715	0.000158632	0.00206034
ENSG00000259553	AC140725.1	8.34356	5.74088	25.2086	6.33806	35.5322	70.5367	28.9751	35.3445	1.91105	0.500648	-3.81716	0.000134998	0.00182579
ENSG00000213140	ELK2AP	2.72115	0	5.79764	3.15274	10.5903	17.7921	4.81551	30.5448	1.9104	0.680328	-2.80806	0.00498411	0.0267718
ENSG00000124721	DNAH8	33.9544	28.8915	301.416	253.85	641.263	796.574	303.127	1349.32	1.90954	0.657465	-2.90439	0.00367971	0.0213599
ENSG00000237899	AL031289.1	1.23143	1.30939	3.38192	3.0324	7.89819	11.4046	6.55619	8.89154	1.90636	0.747892	-2.54897	0.010804	0.0468603
ENSG00000214776	AC092821.1	116.79	126.22	313.819	141.371	729.845	861.544	370.762	495.775	1.90594	0.47472	-4.01487	5.9478e-05	0.000973993
ENSG00000279987	AC008103.1	2.35709	2.49681	9.66354	6.08414	28.6667	13.5209	16.5213	77.6082	1.90437	0.692108	-2.75155	0.00593145	0.0304073
ENSG00000227518	MIR1302-9HG	3.46788	3.61552	10.314	17.5198	33.444	45.5138	21.9209	31.1465	1.90374	0.43814	-4.34505	1.39243e-05	0.000315906
ENSG00000092853	CLSPN	283.44	290.694	533.777	366.389	1549.41	1716.66	871.687	810.492	1.90282	0.273922	-6.94659	3.74216e-12	1.08381e-09
ENSG00000128346	C22orf23	33.5914	4.60592	22.8634	0.825806	38.7035	96.5593	25.8044	280.421	1.90181	0.67508	-2.81716	0.00484508	0.0261781
ENSG00000215512	AP005901.1	40.2223	37.7284	110.902	47.2409	146.554	379.069	137.041	312.355	1.90055	0.472427	-4.02295	5.74745e-05	0.000949069
ENSG00000178723	GLULP4	5.94016	1.25187	2.15378	5.06372	8.70195	23.0503	9.23868	10.267	1.90019	0.655916	-2.89701	0.00376743	0.0217559
ENSG00000160471	COX6B2	167.734	223.219	211.525	165.671	789.211	850.861	510.372	751.321	1.89998	0.210764	-9.01474	1.97335e-19	1.05732e-15
ENSG00000229920	RPS4XP5	5.57057	7.35565	5.93689	6.06691	19.8267	25.3464	23.7149	15.4959	1.89997	0.412317	-4.60803	4.06507e-06	0.000114234
ENSG00000230563	AL121757.1	9.14847	14.5116	10.6369	1.27859	13.2845	39.2238	45.787	84.5989	1.89783	0.603505	-3.14468	0.00166267	0.0118861
ENSG00000242390	RPL6P9	3.39485	1.22466	7.17964	1.98578	11.812	18.597	9.04662	8.73884	1.89781	0.629785	-3.01342	0.00258322	0.0164838
ENSG00000265717	AC103808.3	2.34038	5.06215	6.43118	6.04434	16.3571	27.0245	12.8833	13.4335	1.8965	0.542211	-3.49772	0.000469258	0.00465609
ENSG00000226903	LINC00354	3.38513	1.17867	9.01076	4.47035	13.9742	30.2637	9.19778	33.1789	1.89635	0.599381	-3.16384	0.00155701	0.0113323
ENSG00000186777	ZNF732	22.7748	3.70505	77.2041	38.2293	130.481	184.684	84.1151	83.4595	1.89633	0.591193	-3.20764	0.00133831	0.0101266
ENSG00000151952	TMEM132D	1.35501	0	7.40102	15.1051	24.7176	25.3122	19.0641	14.6463	1.89611	0.729957	-2.59756	0.00938887	0.0423685
ENSG00000228509	AC006460.1	58.1204	64.5473	184.36	137.63	438.941	561.258	238.757	218.701	1.89541	0.374443	-5.06195	4.14997e-07	1.80532e-05
ENSG00000240747	KRBOX1	37.4878	33.621	71.3856	95.5592	221.732	288.223	156.967	272.235	1.89221	0.334708	-5.65332	1.5738e-08	1.24006e-06
ENSG00000226983	LINC01692	9.10208	5.10402	21.0628	11.1684	40.2009	58.3444	32.2346	21.6757	1.89186	0.420974	-4.49402	6.9891e-06	0.000180037
ENSG00000118492	ADGB	16.2156	17.5673	58.3225	22.6299	76.9252	197.935	36.202	309.151	1.89055	0.525766	-3.5958	0.000323399	0.0035128
ENSG00000171124	FUT3	1.55503	1.57735	19.2695	11.8699	31.3765	35.5517	17.514	22.3507	1.89037	0.718847	-2.62973	0.00854526	0.0396182
ENSG00000131773	KHDRBS3	106.47	98.4469	251.065	167.065	558.932	785.883	387.515	926.035	1.88986	0.335377	-5.63504	1.75016e-08	1.35904e-06
ENSG00000184716	SERINC4	7.43639	5.02448	42.1828	36.1616	92.7756	110.617	51.3653	54.6222	1.88841	0.581356	-3.24829	0.00116103	0.0090947
ENSG00000139144	PIK3C2G	14.6836	12.1625	28.122	12.8698	91.1214	63.2504	38.3007	34.389	1.88805	0.477272	-3.95592	7.62421e-05	0.00118179
ENSG00000163793	DNAJC5G	72.8656	60.8135	130.308	89.568	305.641	450.866	221.667	332.605	1.88427	0.341897	-5.51123	3.56344e-08	2.44781e-06
ENSG00000268606	MAGEA2	70.4803	5.62088	70.312	44.8916	280.783	130.93	116.831	65.7502	1.88221	0.578369	-3.25434	0.00113658	0.00895776
ENSG00000121690	DEPDC7	13.224	16.1118	36.2306	14.1707	80.3839	97.7725	43.387	152.166	1.88122	0.40037	-4.6987	2.61818e-06	8.10099e-05
ENSG00000260094	LINC00564	3.03295	1.14551	22.0428	13.6287	30.5366	65.6019	15.7857	20.2157	1.88094	0.730934	-2.57334	0.0100723	0.0446281
ENSG00000166845	C18orf54	50.7231	54.765	169.778	174.943	403.925	626.613	213.349	389.512	1.87981	0.475927	-3.94979	7.82189e-05	0.00120477
ENSG00000163249	CCNYL1	185.245	189.971	210.185	179.104	814.517	823.614	475.938	390.125	1.87981	0.24314	-7.73136	1.06407e-14	8.69642e-12
ENSG00000160298	C21orf58	94.7687	52.8708	117.715	76.3549	317.684	444.283	180.971	207.326	1.87946	0.29755	-6.31646	2.67631e-10	4.15643e-08
ENSG00000213225	NOC2LP1	33.0792	37.7289	69.9417	44.8185	208.471	201.027	102.399	122.64	1.87944	0.308625	-6.08972	1.13108e-09	1.34587e-07
ENSG00000253974	NRG1-IT1	4.97711	0	14.5283	10.6946	25.5599	49.1194	11.5351	57.9794	1.87941	0.644383	-2.9166	0.00353865	0.020763
ENSG00000071539	TRIP13	97.2148	95.7436	192.826	161.602	498.469	707.405	310.464	384.168	1.87788	0.316762	-5.92838	3.05936e-09	3.06394e-07
ENSG00000119969	HELLS	220.866	203.34	554.098	526.07	1450.86	1692.34	999.191	768.496	1.87746	0.342028	-5.4892	4.03769e-08	2.72065e-06
ENSG00000040275	SPDL1	75.8284	96.8526	250.07	160.555	422.072	710.52	473.368	559.718	1.87619	0.356872	-5.25732	1.46171e-07	7.75428e-06
ENSG00000196118	CCDC189	50.6828	31.2973	73.5	53.2309	215.21	201.777	162.254	155.87	1.87601	0.437421	-4.2888	1.79639e-05	0.000387386
ENSG00000272138	LINC01607	2.84384	3.63745	11.2741	15.2167	37.9713	39.921	6.3488	19.222	1.87514	0.682868	-2.74598	0.00603313	0.0307667
ENSG00000173404	INSM1	4.99383	1.21642	10.071	7.86866	23.924	25.2825	17.8435	12.2165	1.87383	0.628508	-2.9814	0.00286937	0.0178386
ENSG00000229205	LINC00200	23.8016	11.4511	59.2594	67.721	174.814	171.503	106.182	83.4347	1.87361	0.457607	-4.09436	4.23343e-05	0.000749969
ENSG00000039600	SOX30	44.6022	30.919	161.303	149.214	343.311	508.626	211.537	701.974	1.87251	0.516719	-3.62384	0.000290266	0.00325025
ENSG00000222004	LINC02860	2.30683	0	10.4473	5.0639	22.8962	19.6793	8.23198	25.8577	1.87191	0.599278	-3.1236	0.00178651	0.0125017
ENSG00000183632	TP53TG3	3.57304	1.61976	29.5929	14.273	34.5836	71.1746	33.6057	71.9444	1.8696	0.657175	-2.84491	0.00444241	0.0246003
ENSG00000236908	LINC02827	1.04009	4.35718	12.1871	12.4762	29.562	18.7683	37.4117	12.3766	1.86759	0.649267	-2.87647	0.00402157	0.0228824
ENSG00000101057	MYBL2	80.4029	71.606	266.406	255.341	730.639	737.413	378.977	358.251	1.86686	0.406032	-4.59782	4.26928e-06	0.000118522
ENSG00000266850	AC090912.2	2.47855	0	6.54995	8.24999	25.0323	16.5991	7.10225	8.82862	1.86654	0.729288	-2.5594	0.0104853	0.0459051
ENSG00000286234	AC079790.2	10.7398	8.71332	31.0763	13.1556	54.8634	84.0333	37.3099	44.8536	1.86637	0.428232	-4.3583	1.31075e-05	0.000300771
ENSG00000182586	LINC00334	4.52658	7.8876	17.4006	18.5643	55.9189	43.3363	31.62	30.2636	1.86626	0.457876	-4.07591	4.58354e-05	0.000794777
ENSG00000164532	TBX20	6.96419	2.3917	19.6101	2.90173	31.4882	35.1479	21.237	16.6067	1.86571	0.574175	-3.24937	0.00115663	0.00907349
ENSG00000100473	COCH	15.8189	20.6062	22.6636	7.35774	58.0078	60.1047	59.817	30.7311	1.86555	0.382657	-4.87526	1.08663e-06	3.94659e-05
ENSG00000261038	AL133457.1	10.179	7.33384	35.185	20.0075	48.6571	120.636	31.0577	36.5774	1.86383	0.545164	-3.41884	0.000628887	0.00578094
ENSG00000267151	MIR2117HG	5.09376	2.64032	4.61433	0	11.0392	14.843	6.75977	7.91189	1.86091	0.712131	-2.61316	0.00897096	0.0410065
ENSG00000198056	PRIM1	79.4374	89.2198	137.908	85.9555	372.284	421.069	273.644	207.266	1.86083	0.247724	-7.51171	5.83586e-14	3.3502e-11
ENSG00000167670	CHAF1A	218.54	181.034	346.329	200.956	1070.29	885.062	627.375	486.993	1.8603	0.224721	-8.27826	1.2499e-16	1.67424e-13
ENSG00000187999	HNRNPA1P61	3.41751	1.24269	2.07083	4.00073	15.6748	9.73339	4.54769	15.1837	1.85953	0.689056	-2.69867	0.00696179	0.0340911
ENSG00000117724	CENPF	201.606	237.915	371.696	411.863	1041.1	1725.71	575.042	753.717	1.85845	0.353299	-5.26026	1.43849e-07	7.64373e-06
ENSG00000273058	AL359921.2	6.06109	6.51724	3.36212	4.13586	18.3256	15.335	20.3283	10.6823	1.85816	0.616149	-3.01576	0.00256336	0.0163896
ENSG00000225151	GOLGA2P7	193.185	153.415	558.134	404.247	1077.91	1511.32	972.147	827.665	1.85811	0.387685	-4.79284	1.64439e-06	5.54435e-05
ENSG00000260510	AC004381.1	1.23471	1.35981	6.93655	7.10805	8.3743	23.9179	14.7942	22.1104	1.85703	0.603819	-3.07548	0.00210165	0.0141228
ENSG00000227741	AL121987.2	15.2824	10.1535	13.4881	11.7853	47.5373	50.1601	39.872	33.2891	1.85612	0.334124	-5.55519	2.77317e-08	2.00342e-06
ENSG00000170779	CDCA4	55.1354	43.9754	127.116	117.433	353.799	362.179	221.66	179.917	1.85572	0.327567	-5.66517	1.46881e-08	1.17229e-06
ENSG00000275857	AC009133.4	4.8081	0	4.44586	5.118	12.3192	20.1063	7.42815	13.0673	1.85528	0.633799	-2.92724	0.0034199	0.020277
ENSG00000180574	EIF2S3B	11.6691	6.78574	21.9185	11.1457	47.4927	63.8943	28.5383	27.2223	1.85077	0.449567	-4.11678	3.84197e-05	0.000696864
ENSG00000284626	AC091167.7	0.745531	1.53812	8.38272	7.38346	10.2822	16.2259	12.4884	21.3296	1.84862	0.667428	-2.76977	0.0056096	0.0292186
ENSG00000162620	LRRIQ3	26.9759	15.5329	58.6704	35.2809	110.233	182.466	73.5626	219.586	1.84837	0.393239	-4.70038	2.59682e-06	8.05816e-05
ENSG00000174255	ZNF80	14.0137	10.135	38.2868	29.0684	89.4852	121.96	37.4867	38.7305	1.84791	0.469025	-3.93989	8.15197e-05	0.00124263
ENSG00000259254	AC022405.1	4.31443	0	7.9058	5.94272	22.7168	20.2588	7.97839	11.3827	1.84689	0.632659	-2.91924	0.00350883	0.0206408
ENSG00000123975	CKS2	49.104	73.7033	176.689	102.58	287.693	471.426	327.558	306.124	1.84669	0.390031	-4.73472	2.19363e-06	7.00718e-05
ENSG00000064199	SPA17	63.5624	58.8886	86.8512	125.661	199.405	576.706	128.38	631.202	1.84636	0.460513	-4.00935	6.08849e-05	0.000991053
ENSG00000284668	LINC02780	8.39184	4.79079	24.1537	16.5319	61.1278	59.5777	29.6346	29.7191	1.84617	0.460611	-4.0081	6.12101e-05	0.000995337
ENSG00000171595	DNAI2	2.39692	3.72522	16.3881	5.04811	21.596	41.0597	10.5069	211.174	1.84565	0.630244	-2.92846	0.00340644	0.0202272
ENSG00000279249	AC007614.1	46.1033	63.5067	125.479	50.3025	275.797	371.127	123.528	170.152	1.84486	0.437927	-4.21271	2.52322e-05	0.000505713
ENSG00000284922	AP000812.4	7.48425	4.5581	3.45994	3.25072	22.3095	18.0426	5.33037	28.6816	1.84415	0.566807	-3.25357	0.00113964	0.00897087
ENSG00000203907	OOEP	6.93102	6.98975	32.7124	33.0275	88.1361	85.2297	37.9108	44.3124	1.84396	0.544536	-3.38629	0.000708437	0.00633632
ENSG00000131721	RHOXF2	14.6838	22.8236	48.6727	112.665	378.546	72.2686	85.8804	85.8409	1.84325	0.664994	-2.77184	0.00557412	0.0291282
ENSG00000178965	ERICH3	5.88143	15.877	38.8402	7.24043	43.0943	115.675	14.1584	705.129	1.84264	0.651696	-2.82746	0.00469191	0.0255697
ENSG00000196990	FAM163B	1.24625	6.31555	11.0144	15.4961	35.6157	39.7868	18.6849	19.8484	1.84232	0.530303	-3.47409	0.000512594	0.00496501
ENSG00000184908	CLCNKB	3.15074	9.58102	4.71736	10.0129	30.8229	18.985	23.684	22.1008	1.84122	0.529347	-3.47828	0.000504649	0.00491322
ENSG00000102221	JADE3	274.315	261.474	427.297	362.997	1341.77	1260.7	966.469	645.647	1.84118	0.186677	-9.86291	6.02746e-23	6.45903e-19
ENSG00000253433	NCRNA00250	3.49079	0	6.50637	4.03336	11.6429	18.8806	8.21654	13.1003	1.83641	0.607493	-3.02293	0.00250343	0.0161122
ENSG00000117650	NEK2	128.409	120.816	227.621	170.011	606.633	780.04	348.995	635.853	1.83603	0.31827	-5.76879	7.98408e-09	6.99379e-07
ENSG00000248663	LINC00992	1.09826	0	5.05469	3.8914	9.92394	12.4622	6.2447	12.1971	1.83603	0.651629	-2.8176	0.0048384	0.0261552
ENSG00000255836	AC131206.1	13.6658	7.41957	47.596	27.3999	106.235	122.545	30.5255	66.423	1.83485	0.532313	-3.44693	0.000567	0.00534325
ENSG00000137309	HMGA1	324.171	231.701	1095.03	819.344	2579.99	2376.18	1653.85	1181.68	1.83427	0.437819	-4.18955	2.79505e-05	0.000544248
ENSG00000183780	SLC35F3	5.70831	3.86217	9.19461	9.00285	35.5569	30.0291	10.0516	12.1795	1.83425	0.576489	-3.18176	0.00146382	0.0108181
ENSG00000249359	AC093274.1	9.30398	4.4663	27.2307	18.9936	62.151	73.9412	37.2452	41.5658	1.8329	0.483015	-3.79471	0.000147814	0.00195472
ENSG00000255624	C10orf88B	5.38908	10.2461	14.5348	20.4723	51.5953	53.5295	32.9509	32.6636	1.8324	0.356498	-5.13999	2.7476e-07	1.28761e-05
ENSG00000106128	GHRHR	1.48992	1.62101	8.65226	6.4279	16.4297	25.6021	8.58307	7.07519	1.83204	0.698734	-2.62194	0.008743	0.0402448
ENSG00000153303	FRMD1	82.4694	49.5431	130.514	82.3141	349.71	360.598	209.69	209.329	1.82999	0.338855	-5.40051	6.64529e-08	4.06146e-06
ENSG00000164746	C7orf57	2.19862	2.22098	6.92167	4.5756	11.5804	24.8428	7.43346	33.3384	1.82957	0.612816	-2.98551	0.00283101	0.0176568
ENSG00000123977	DAW1	19.272	23.223	60.1809	44.5479	92.7885	213.242	89.1761	345.176	1.82947	0.402513	-4.54511	5.49074e-06	0.000146123
ENSG00000286204	AC025475.2	10.2765	8.65956	21.0836	21.1887	61.1692	78.1021	25.7588	27.0601	1.82875	0.463178	-3.94827	7.87184e-05	0.00121083
ENSG00000176208	ATAD5	101.66	120.965	162.697	152.065	476.425	657.739	303.201	263.15	1.82825	0.247687	-7.38129	1.56763e-13	7.4112e-11
ENSG00000152092	ASTN1	39.773	18.8407	22.52	34.9771	118.899	132.569	59.4738	65.8993	1.82779	0.328989	-5.55577	2.76389e-08	2.00121e-06
ENSG00000213973	ZNF99	60.8485	60.5193	144.369	103.866	339.115	438.166	209.91	265.444	1.82685	0.358703	-5.09292	3.52598e-07	1.56782e-05
ENSG00000261761	LINC02616	1.13864	1.23194	19.9087	21.8162	33.7093	62.3304	24.4404	25.1014	1.82681	0.706063	-2.58732	0.00967267	0.0433028
ENSG00000261043	AC019294.3	9.53003	16.3136	26.7009	15.2999	84.9338	67.6056	28.954	42.8247	1.82651	0.419888	-4.35001	1.36132e-05	0.000309941
ENSG00000244607	CCDC13	38.819	12.8121	28.3016	57.2087	99.3933	229.456	35.981	109.114	1.8263	0.537208	-3.39961	0.000674815	0.00608939
ENSG00000260063	AL512408.1	17.9314	12.4686	25.6464	14.3478	64.523	69.1132	54.5442	40.3824	1.82616	0.350381	-5.21193	1.86891e-07	9.4468e-06
ENSG00000251463	FKBP4P1	9.46981	10.0366	12.9305	30.5116	71.5062	65.4665	32.6516	30.8597	1.82579	0.460648	-3.96352	7.38528e-05	0.0011524
ENSG00000105173	CCNE1	19.1887	14.2146	99.5896	45.6921	161.049	171.46	135.533	104.627	1.82554	0.465317	-3.92323	8.7371e-05	0.00131639
ENSG00000257838	OTOAP1	11.495	3.64871	18.5966	7.06938	39.5302	27.9212	41.8487	30.1064	1.82492	0.453501	-4.02408	5.71983e-05	0.000945891
ENSG00000189212	DPY19L2P1	120.042	110.715	203.971	143.918	386.988	838.54	315.304	609.213	1.82479	0.308614	-5.91284	3.36257e-09	3.34674e-07
ENSG00000230258	AC005208.1	5.00641	2.26356	10.3121	6.44768	31.1035	19.3452	14.1035	11.1886	1.82469	0.591455	-3.08509	0.00203494	0.013787
ENSG00000189295	ANKRD62P1-PARP4P3	3.50545	8.09204	20.9158	4.1889	34.7864	55.7135	10.7317	44.3294	1.8238	0.636634	-2.86476	0.00417326	0.023496
ENSG00000188219	POTEE	81.2604	92.4399	325.602	601.371	999.963	1512.64	411.262	1148.23	1.82312	0.560776	-3.25106	0.00114975	0.00903238
ENSG00000258804	LINC01148	12.1688	12.3088	25.4702	26.9801	93.5327	81.3029	31.1252	35.7464	1.81661	0.46062	-3.94385	8.01841e-05	0.00122835
ENSG00000255152	MSH5-SAPCD1	36.2637	57.992	55.8616	34.1211	213.29	177.183	95.9538	84.7827	1.81511	0.328625	-5.52335	3.326e-08	2.32444e-06
ENSG00000228184	SNX19P1	9.3814	2.48076	23.3849	43.6649	88.3837	79.7593	42.2679	28.6703	1.81511	0.629594	-2.88299	0.00393921	0.0224774
ENSG00000233656	AL445430.1	0.952082	2.42524	11.0805	19.5313	47.4441	27.67	15.2378	33.3952	1.81456	0.651026	-2.78722	0.00531618	0.028151
ENSG00000249085	AC035140.1	2.58278	1.28978	2.3094	3.16894	9.78985	9.46087	5.63866	12.9052	1.81236	0.650808	-2.78478	0.00535641	0.0283081
ENSG00000184357	H1-5	36.3412	33.8538	74.308	91.8865	179.562	261.452	186.048	121.086	1.8116	0.337525	-5.36731	7.99216e-08	4.69711e-06
ENSG00000287356	AL590822.3	4.43388	13.3281	33.5064	48.4985	117.002	70.3956	76.2989	46.437	1.81018	0.562273	-3.2194	0.00128461	0.00981206
ENSG00000162062	TEDC2	6.48312	8.60639	63.0775	56.1473	159.581	126.905	64.2332	67.9921	1.80977	0.585546	-3.09075	0.00199655	0.0135841
ENSG00000118557	PMFBP1	20.5051	23.103	37.3967	58.9108	93.1419	195.36	77.3838	269.205	1.80944	0.465044	-3.89091	9.98692e-05	0.0014587
ENSG00000152669	CCNO	8.15886	1.06121	39.3687	34.9013	70.8734	99.3601	50.1645	75.7737	1.80938	0.629118	-2.87606	0.00402674	0.0229037
ENSG00000196218	RYR1	232.926	189.978	400.512	355.025	1417.39	958.085	714.371	595.067	1.80934	0.337416	-5.36234	8.21501e-08	4.80175e-06
ENSG00000286722	AC009244.1	1.16734	4.92435	5.24986	5.05163	15.5254	24.5869	3.66008	9.21377	1.80777	0.667177	-2.70958	0.00673675	0.0333223
ENSG00000139734	DIAPH3	49.8158	59.6604	108.817	81.5611	265.282	380.634	149.865	291.237	1.80504	0.340673	-5.29846	1.16785e-07	6.41778e-06
ENSG00000268686	AC010643.1	47.808	55.0946	102.769	85.4741	258.248	327.802	188.234	204.284	1.8038	0.267007	-6.75562	1.42229e-11	3.24282e-09
ENSG00000228923	AP000355.1	1.14092	2.51615	5.33538	7.96891	19.15	17.5237	9.08174	7.63034	1.8028	0.617751	-2.91832	0.0035192	0.0206791
ENSG00000243295	AC126121.3	2.75029	3.29451	5.99604	9.14121	10.956	28.6805	16.461	28.1001	1.80257	0.545017	-3.30736	0.000941796	0.00782145
ENSG00000285648	AC137735.2	0	2.52439	7.58141	4.10269	17.5192	11.9486	8.4028	7.47607	1.80133	0.712217	-2.52919	0.0114326	0.0488873
ENSG00000163673	DCLK3	4.55004	6.05074	8.12575	5.00867	30.4077	18.4325	13.4308	59.1633	1.80121	0.6444	-2.79517	0.00518722	0.0276228
ENSG00000197106	SLC6A17	11.2724	8.72339	66.3633	85.497	169.659	190.102	90.7889	96.6536	1.80026	0.631057	-2.85276	0.00433409	0.0241587
ENSG00000244151	AC010973.2	6.33919	11.7042	15.6027	8.23847	54.8989	26.9532	27.3604	19.9844	1.80019	0.437288	-4.1167	3.84329e-05	0.000696864
ENSG00000215186	GOLGA6B	8.16379	30.2771	10.4749	6.28466	72.4129	20.5968	36.5725	108.786	1.80018	0.633277	-2.84264	0.00447414	0.0247134
ENSG00000109881	CCDC34	55.1559	49.7185	129.425	143.973	310.968	507.98	171.54	306.728	1.79963	0.406017	-4.4324	9.31886e-06	0.000227646
ENSG00000266117	FBXO36P1	1.11719	2.46134	5.17455	7.00675	9.80055	24.2241	8.17329	7.52055	1.79932	0.700107	-2.57006	0.0101681	0.0448729
ENSG00000158516	CPA2	2.95503	2.06998	16.6901	14.5165	52.601	24.0879	17.6739	17.9778	1.79838	0.674942	-2.66449	0.00771041	0.0367766
ENSG00000262874	C19orf84	21.3651	18.0929	122.452	71.4547	261.39	233.674	115.891	106.353	1.79788	0.554971	-3.23958	0.00119705	0.00930657
ENSG00000239402	CYP4F62P	0	4.98149	9.39862	2.47998	10.9142	24.0079	7.36033	86.6113	1.79747	0.664878	-2.70346	0.00686208	0.0337673
ENSG00000244471	AL137058.1	41.1052	21.725	92.8189	130.739	242.958	355.638	152.697	183.39	1.79503	0.457568	-3.92297	8.74645e-05	0.00131639
ENSG00000172803	SNX32	8.85373	28.787	31.4527	6.23183	82.811	62.146	44.9721	51.8351	1.7939	0.463045	-3.87414	0.000107001	0.00153019
ENSG00000204624	DISP3	27.853	5.33523	40.5872	46.9729	118.828	126.85	67.569	93.9148	1.79383	0.539781	-3.32326	0.000889715	0.00750129
ENSG00000270722	RNVU1-31	13.4576	13.5904	21.5974	34.2438	108.84	51.7488	56.5686	60.544	1.79316	0.569685	-3.14763	0.00164599	0.0118084
ENSG00000261787	TCF24	3.02673	16.9829	14.793	28.873	59.347	65.1316	37.4415	36.2702	1.79274	0.510426	-3.51224	0.00044435	0.00447243
ENSG00000229703	LYPD9P	8.71344	17.6299	33.8056	33.9887	68.0551	110.673	66.8197	50.2458	1.79245	0.422806	-4.23942	2.24103e-05	0.000458298
ENSG00000178021	TSPYL6	64.3423	45.4629	395.929	368.375	844.599	947.872	480.781	484.926	1.79242	0.607816	-2.94895	0.00318855	0.0192426
ENSG00000227748	AL138916.1	4.96603	4.04684	4.20356	1.07361	15.9719	11.2417	9.57296	6.97307	1.7916	0.676765	-2.6473	0.00811366	0.0381789
ENSG00000104044	OCA2	20.1988	13.9404	62.2477	114.416	218.086	227.911	104.889	104.867	1.78939	0.569845	-3.14014	0.00168869	0.0120106
ENSG00000068078	FGFR3	96.2005	58.1942	460.828	393.229	1110.32	852.686	651.653	467.933	1.78915	0.532257	-3.36145	0.000775358	0.00676632
ENSG00000046774	MAGEC2	47.7327	33.5345	260.022	276.074	555.886	635.079	407.334	250.81	1.78524	0.588914	-3.0314	0.00243419	0.0158114
ENSG00000186510	CLCNKA	7.50643	7.15116	7.50133	34.4982	67.8993	36.4724	36.4833	57.8227	1.78346	0.663434	-2.68823	0.00718328	0.0348571
ENSG00000142700	DMRTA2	2.39289	1.30618	4.7226	2.31243	7.79788	9.46961	10.9349	15.9999	1.78304	0.631959	-2.82145	0.00478074	0.0259351
ENSG00000181577	C6orf223	7.13149	5.65718	11.5693	2.80046	24.6295	33.5489	9.24603	11.6355	1.78296	0.607909	-2.93294	0.00335766	0.0200078
ENSG00000203711	C6orf99	12.6658	12.2269	20.2284	27.6944	49.9519	97.0975	42.9228	182.755	1.78295	0.40532	-4.39886	1.08821e-05	0.000256946
ENSG00000170927	PKHD1	15.6877	12.8072	59.5381	76.8686	183.015	159.277	83.1652	119.324	1.78236	0.541263	-3.29297	0.000991355	0.00810119
ENSG00000229018	PMS2P7	32.421	19.2864	26.5126	35.0304	116.997	111.428	65.0044	74.1387	1.78124	0.308065	-5.78202	7.38108e-09	6.55489e-07
ENSG00000251410	AC007106.1	15.8766	17.2471	39.4275	47.6217	103.748	158.788	49.9268	53.9048	1.78079	0.435116	-4.09269	4.26406e-05	0.000753191
ENSG00000287009	AC021037.1	2.35149	1.22509	3.12911	4.06171	12.0088	14.0381	2.73551	27.1572	1.78051	0.665823	-2.67414	0.00749204	0.0359483
ENSG00000118976	OTUD4P1	7.94699	4.86136	24.6317	26.4017	56.5785	88.1444	21.8354	32.3425	1.77944	0.572846	-3.10632	0.00189431	0.0130599
ENSG00000188659	SAXO2	43.9807	24.6951	38.4345	24.1008	88.6695	168.136	80.3149	131.214	1.7794	0.343736	-5.17665	2.25901e-07	1.09536e-05
ENSG00000259284	LINC02349	6.61483	10.4765	5.08216	0.999369	24.1121	15.6752	18.9884	10.6223	1.77801	0.619591	-2.86965	0.00410922	0.0232535
ENSG00000183914	DNAH2	176.241	115.994	175.69	110.719	462.492	752.11	278.215	591.592	1.77756	0.296456	-5.99603	2.02203e-09	2.1037e-07
ENSG00000258841	EEF1A1P2	2.27975	2.43671	10.3369	10.0746	34.8849	19.407	11.8217	14.0418	1.77706	0.614674	-2.89106	0.0038395	0.0220651
ENSG00000255236	AP002992.1	1.95039	2.00073	19.2311	4.88981	17.605	22.3685	19.2034	41.1532	1.77433	0.665217	-2.66729	0.00764662	0.0365591
ENSG00000259756	AC100839.1	8.57934	3.87224	16.8004	20.6719	54.7678	38.9862	36.8189	24.9214	1.77394	0.439584	-4.03549	5.44891e-05	0.000910456
ENSG00000186453	FAM228A	94.0954	38.7693	65.1236	48.3398	194.142	329.299	112.16	215.277	1.7738	0.352343	-5.0343	4.79595e-07	2.03106e-05
ENSG00000260475	AL353719.1	5.22109	15.4901	13.4632	6.23576	30.2967	51.4012	21.7507	33.5157	1.77355	0.418014	-4.24281	2.20738e-05	0.000452858
ENSG00000257711	AC079385.2	50.1034	46.3868	49.8765	55.6751	123.668	301.18	96.5764	225.078	1.77338	0.328974	-5.39064	7.02086e-08	4.25862e-06
ENSG00000181355	OFCC1	12.3651	14.5078	30.9129	61.9432	101.522	164.22	52.7619	62.5816	1.77314	0.506716	-3.49928	0.00046651	0.00463597
ENSG00000250514	LINC02125	1.127	12.1322	46.0057	65.3053	115.722	145.071	59.6672	82.492	1.77017	0.672677	-2.63154	0.00849997	0.0394652
ENSG00000274618	H4C6	127.776	112.227	444.602	298.486	680.595	1064.51	772.508	659.383	1.7701	0.439267	-4.02967	5.58556e-05	0.000929424
ENSG00000166323	C11orf65	17.4937	26.8142	66.9411	50.8822	120.645	177.885	115.514	217.517	1.76975	0.380363	-4.65279	3.27479e-06	9.6674e-05
ENSG00000254533	AF186192.1	0	1.32014	5.70504	4.18958	10.71	10.1454	8.52788	7.03082	1.76944	0.697272	-2.53766	0.0111595	0.0480457
ENSG00000282375	AC100797.4	1.20836	1.22055	8.58027	8.36341	19.0785	15.5332	16.5445	12.3699	1.76923	0.540127	-3.27558	0.00105444	0.00847873
ENSG00000213023	SYT3	2.8635	6.70068	11.6418	19.2979	40.7701	39.4075	22.9263	24.2753	1.76852	0.539837	-3.27603	0.00105278	0.00847279
ENSG00000184911	DMRTC1B	18.0116	21.5637	24.8932	29.7405	113.126	76.2949	52.9674	44.4542	1.76823	0.407758	-4.33647	1.44792e-05	0.000324601
ENSG00000256615	AC010197.1	11.2758	5.20945	35.0324	16.465	61.3396	78.7063	34.8968	28.0755	1.76762	0.555265	-3.18338	0.00145568	0.0107803
ENSG00000173809	TDRD12	171.338	125.027	349.245	292.678	868.591	1048.01	481.985	521.754	1.7667	0.347866	-5.0787	3.80031e-07	1.67589e-05
ENSG00000274641	H2BC17	10.3314	3.99605	5.77537	14.4565	28.7415	24.7957	36.2099	19.4794	1.7663	0.491096	-3.59665	0.000322339	0.00350798
ENSG00000261786	AC006058.1	2.252	2.40244	13.2449	21.0578	27.9814	47.9345	25.2995	16.7065	1.76593	0.622887	-2.83508	0.00458149	0.0251084
ENSG00000062282	DGAT2	55.7421	35.5358	220.386	183.462	493.709	503.853	264.756	380.262	1.76399	0.514374	-3.42939	0.00060494	0.00560935
ENSG00000227210	AC079145.1	8.40581	2.66838	14.9267	4.45682	23.9332	33.2591	16.1096	19.826	1.7639	0.665611	-2.65004	0.00804818	0.0379819
ENSG00000127337	YEATS4	75.5955	88.368	86.456	77.4873	243.274	420.618	171.353	242.03	1.7621	0.296056	-5.9519	2.65054e-09	2.71368e-07
ENSG00000120057	SFRP5	2.49029	4.96805	3.28393	4.15597	14.6595	14.9116	8.35796	7.05915	1.76156	0.653498	-2.69559	0.00702635	0.0342975
ENSG00000172460	PRSS30P	11.5166	16.6992	30.2323	73.0883	124.23	127.972	79.6879	99.6637	1.76085	0.526469	-3.34465	0.000823866	0.00708361
ENSG00000244003	RN7SL143P	2.44444	0	7.08828	11.1224	21.1513	19.065	13.961	13.484	1.75998	0.601957	-2.92377	0.00345822	0.020421
ENSG00000161992	PRR35	2.56143	3.69042	12.3796	11.8903	37.3134	21.4289	19.691	16.6059	1.75943	0.605446	-2.90601	0.00366073	0.021285
ENSG00000248370	LINC02434	1.31745	2.89136	16.9204	14.9672	37.7995	34.2679	24.386	18.3428	1.75847	0.587459	-2.99334	0.00275938	0.0173436
ENSG00000198826	ARHGAP11A	171.408	121.601	258.454	188.39	687.268	829.231	365.328	441.697	1.75807	0.281927	-6.23592	4.49127e-10	6.30503e-08
ENSG00000257446	ZNF878	1.1349	7.43803	6.16246	1.01881	14.8212	14.5496	10.1303	9.60859	1.75692	0.636384	-2.76079	0.00576613	0.0298022
ENSG00000224227	OR2L1P	0	6.54151	6.84711	2.1512	18.5237	13.5647	7.74574	9.05478	1.75618	0.641215	-2.73884	0.00616567	0.0312718
ENSG00000140015	KCNH5	5.37769	4.76887	25.299	15.9794	47.2573	42.2958	41.0783	31.8469	1.75579	0.527519	-3.3284	0.000873461	0.00738878
ENSG00000280257	AC007741.1	4.44032	1.20138	7.00125	10.0507	26.8804	18.9114	13.5776	23.3052	1.75413	0.521176	-3.36573	0.000763427	0.0066965
ENSG00000134376	CRB1	90.8744	25.5492	54.9181	78.761	298.785	200.8	124.191	182.732	1.7532	0.374567	-4.68061	2.86027e-06	8.6421e-05
ENSG00000286544	AL359502.2	7.71556	2.37113	7.99694	2.96923	23.3933	19.8404	10.7101	10.4466	1.75288	0.598896	-2.92685	0.00342411	0.0202857
ENSG00000259404	EFL1P1	7.63621	4.36278	12.779	22.6517	42.3069	55.1257	30.2415	31.8605	1.75251	0.615471	-2.84742	0.00440747	0.0244506
ENSG00000138160	KIF11	129.051	101.236	335.588	305.21	745.711	1006.22	450.378	480.644	1.75107	0.376991	-4.64485	3.40328e-06	9.93598e-05
ENSG00000261693	AC134682.1	13.6693	3.84351	11.0072	10.3009	37.7417	34.3689	26.3234	24.7065	1.74753	0.410211	-4.26007	2.04364e-05	0.000428007
ENSG00000127586	CHTF18	242.744	98.3015	508.681	390.852	1539.07	943.102	636.316	628.145	1.74655	0.454764	-3.84056	0.000122752	0.0016973
ENSG00000165309	ARMC3	10.8171	1.64287	35.4296	11.0193	62.0934	55.5523	20.6896	254.935	1.74513	0.661134	-2.63961	0.00830019	0.0387447
ENSG00000221949	LINC01465	12.5779	12.4882	11.0084	11.6785	48.7159	45.6671	25.4001	26.2869	1.74498	0.378922	-4.60512	4.1222e-06	0.000115537
ENSG00000259271	ANKRD62P1	5.21979	9.24835	17.9272	26.2561	36.7471	90.326	21.9941	49.6023	1.74476	0.550902	-3.16709	0.0015397	0.0112429
ENSG00000278463	H2AC4	32.7223	16.82	92.964	127.633	187.854	275.51	218.631	159.215	1.74422	0.517207	-3.37237	0.000745235	0.00657098
ENSG00000254094	AC078852.2	7.98605	12.179	18.5832	14.347	43.9951	47.8252	42.9855	25.1987	1.74183	0.358769	-4.85503	1.2037e-06	4.27586e-05
ENSG00000167751	KLK2	25.3892	32.9162	66.4272	64.4431	178.616	187.277	120.255	121.988	1.74174	0.281071	-6.19678	5.76296e-10	7.9514e-08
ENSG00000254815	LMNTD2-AS1	14.1822	8.19215	31.1145	21.0585	80.5722	55.478	53.2308	56.5415	1.74069	0.457352	-3.80602	0.000141223	0.00188949
ENSG00000183248	PRR36	3.4844	7.85496	14.2318	9.57465	36.0617	31.7294	21.1439	14.4793	1.73992	0.465914	-3.73442	0.000188147	0.00233084
ENSG00000188199	NUTM2B	15.8716	21.4913	45.055	7.36598	99.7349	84.9225	39.2727	77.1463	1.73977	0.516312	-3.36962	0.000752732	0.00662437
ENSG00000215237	AL592293.1	5.26548	1.16826	7.65167	6.83743	15.7372	21.3909	16.684	11.4679	1.73832	0.498909	-3.48424	0.000493542	0.00482554
ENSG00000164087	POC1A	44.3136	29.7789	86.749	90.4667	243.857	253.989	134.123	190.968	1.73523	0.337975	-5.13418	2.83374e-07	1.31359e-05
ENSG00000198765	SYCP1	194.812	173.529	291.953	228.777	694.414	998.226	558.227	506.924	1.73444	0.280353	-6.18664	6.14603e-10	8.26705e-08
ENSG00000261758	AC117382.2	24.4185	12.9964	31.8325	38.8514	80.9594	123.202	69.4633	70.2522	1.73432	0.306877	-5.65152	1.59035e-08	1.25004e-06
ENSG00000261606	AC091230.1	74.3725	62.2745	103.682	12.5228	233.982	212.582	183.204	128.298	1.73419	0.584241	-2.96827	0.00299477	0.0183979
ENSG00000261623	LINC02179	1.18577	7.45979	4.28223	6.09658	17.509	19.1476	11.0695	9.99658	1.73403	0.544581	-3.18415	0.0014518	0.010754
ENSG00000183570	PCBP3	95.9125	136.48	133.483	151.373	439.278	530.837	320.46	334.28	1.73331	0.226541	-7.6512	1.99106e-14	1.39149e-11
ENSG00000049768	FOXP3	7.50324	17.9921	14.6871	14.2388	55.4213	51.6553	26.5215	18.9235	1.73278	0.453497	-3.82093	0.000132947	0.00180642
ENSG00000174137	FAM53A	33.6178	56.8208	99.4183	93.6211	277.705	249.625	189.471	183.658	1.73239	0.27009	-6.41411	1.41647e-10	2.40935e-08
ENSG00000166960	CCDC178	22.2643	52.9194	71.2804	38.105	145.881	230.827	75.973	147.362	1.73223	0.464102	-3.73243	0.00018964	0.00234123
ENSG00000100312	ACR	10.6318	5.01645	27.312	7.23997	26.5229	51.3189	45.1405	286.268	1.73168	0.459669	-3.76724	0.000165063	0.00211919
ENSG00000261915	AC026954.2	2.47921	11.3238	5.75652	3.08044	22.003	20.4831	13.0593	15.4304	1.73155	0.571834	-3.02807	0.00246123	0.0159427
ENSG00000255769	GOLGA2P10	28.914	13.5989	47.3235	74.7932	143.513	172.288	96.6097	102.189	1.73118	0.416862	-4.15288	3.28321e-05	0.000616162
ENSG00000178803	ADORA2A-AS1	40.4471	23.0911	59.2327	51.2096	156.042	203.412	76.0442	165.667	1.73043	0.420373	-4.11643	3.84789e-05	0.000697305
ENSG00000080007	DDX43	70.5722	39.0869	190.515	105.001	383.078	435.714	203.839	233.383	1.72967	0.442904	-3.90529	9.41134e-05	0.00138914
ENSG00000186235	LINC02610	5.66526	37.9324	31.2251	5.27289	30.7305	106.233	55.8077	233.543	1.72962	0.603878	-2.86418	0.0041809	0.0235225
ENSG00000227159	DDX11L16	4.79173	1.23915	9.76027	14.2039	24.6992	41.2728	10.0949	12.2828	1.72933	0.673766	-2.56666	0.0102684	0.045208
ENSG00000159289	GOLGA6A	15.3974	46.1858	63.5462	21.6312	120.603	172.038	73.3973	318.211	1.7292	0.588949	-2.93608	0.00332383	0.0198578
ENSG00000028277	POU2F2	54.2804	147.945	96.9488	68.0311	300.098	395.021	216.397	206.21	1.72693	0.335214	-5.15171	2.58116e-07	1.22569e-05
ENSG00000243926	TIPARP-AS1	4.53042	1.71726	15.3632	8.97138	27.994	33.2118	14.5399	44.1702	1.72619	0.595435	-2.89904	0.0037431	0.0216465
ENSG00000144868	TMEM108	32.6515	43.6233	44.9248	114.804	234.639	224.948	122.851	217.553	1.72404	0.621976	-2.77188	0.00557334	0.0291282
ENSG00000259033	AL356804.1	11.3528	11.051	62.6602	46.1738	116.173	151.813	58.2164	57.3943	1.72185	0.546089	-3.15306	0.0016157	0.0116472
ENSG00000204700	OR2J2	9.383	7.16996	17.5458	18.1916	28.4573	60.986	40.1604	38.6981	1.72169	0.412582	-4.17296	3.00662e-05	0.000575338
ENSG00000164404	GDF9	20.6218	22.4814	55.627	20.5397	73.3381	162.683	59.4634	89.3277	1.72117	0.44012	-3.91068	9.20364e-05	0.00136875
ENSG00000009694	TENM1	101.478	165.443	160.774	148.482	809.072	337.54	283.783	198.482	1.72055	0.372287	-4.62156	3.80863e-06	0.000108354
ENSG00000235538	AL078602.1	14.8389	30.8103	68.6476	85.3536	201.473	196.054	97.4231	117.913	1.72013	0.46416	-3.70591	0.000210637	0.00253616
ENSG00000132932	ATP8A2	53.6787	58.1257	190.596	316.608	515.986	686.864	325.182	621.619	1.72005	0.511273	-3.36425	0.000767529	0.0067233
ENSG00000228109	MELTF-AS1	45.146	25.625	40.5388	22.5999	128.652	153.192	52.6324	80.3171	1.71952	0.454498	-3.78335	0.000154734	0.00202211
ENSG00000185974	GRK1	9.57313	3.53676	21.8221	11.735	36.9683	45.0858	21.6194	14.9228	1.7188	0.576773	-2.98003	0.00288216	0.0178976
ENSG00000229301	AC006455.4	4.49528	1.23146	3.10362	3.9627	10.6161	13.5681	8.06171	18.8487	1.71854	0.613924	-2.79927	0.00512186	0.0273745
ENSG00000099840	IZUMO4	62.9203	25.8759	71.9876	34.0599	109.702	278.097	93.4533	890.039	1.71657	0.427935	-4.01129	6.03882e-05	0.000985767
ENSG00000182397	DNM1P46	110.458	116.109	169.552	82.8261	330.706	589.315	260.266	547.553	1.71612	0.323221	-5.30944	1.09964e-07	6.11614e-06
ENSG00000286923	AC004522.5	2.41722	6.43637	7.80071	5.09213	16.0453	31.1824	6.46337	13.2302	1.71468	0.637179	-2.69106	0.00712264	0.034636
ENSG00000144191	CNGA3	1.26242	2.98077	5.0979	9.01062	17.0029	12.8242	11.4727	11.1353	1.71421	0.657259	-2.60812	0.00910399	0.0413792
ENSG00000131037	EPS8L1	10.7497	8.44408	7.11532	8.6125	35.3145	22.7297	25.0194	18.4916	1.71399	0.444083	-3.85961	0.000113569	0.00159782
ENSG00000282944	AC140481.3	20.1616	20.1118	121.739	155.728	271.821	385.413	125.904	467.711	1.71252	0.636987	-2.68846	0.00717814	0.0348374
ENSG00000183770	FOXL2	5.02434	0	5.45872	8.4268	18.6887	19.3444	9.21899	11.935	1.71118	0.635392	-2.6931	0.00707904	0.0344871
ENSG00000137337	MDC1	871.878	804.128	966.65	540.307	2635.93	3324.31	1843.3	2181.65	1.70947	0.22291	-7.66888	1.73509e-14	1.26772e-11
ENSG00000079387	SENP1	314.662	365.93	688.059	382.61	1298.1	2207.58	790.603	1290.78	1.70914	0.32752	-5.21842	1.80455e-07	9.17921e-06
ENSG00000163808	KIF15	25.176	16.1396	84.7761	129.364	258.162	241.217	128.513	396.57	1.70876	0.630415	-2.71053	0.00671766	0.0332552
ENSG00000168779	SHOX2	12.4907	10.0352	14.6431	23.3763	37.9126	83.6208	31.5226	38.3969	1.70391	0.458617	-3.71531	0.000202951	0.00246765
ENSG00000186094	AGBL4	45.2378	62.2174	69.8368	62.2193	219.425	231.561	133.706	161.142	1.70354	0.24471	-6.96147	3.36744e-12	1.01174e-09
ENSG00000164304	CAGE1	16.6123	26.0847	25.3067	21.0563	64.1626	116.39	37.619	124.677	1.70292	0.549722	-3.09779	0.00194969	0.013349
ENSG00000109685	NSD2	932.683	1114.5	1446.72	1701.11	4718.48	5399.71	2558.42	2917.16	1.70156	0.239935	-7.09174	1.32433e-12	4.62769e-10
ENSG00000162669	HFM1	164.109	109.646	301.268	249.588	590.332	968.732	452.586	455.067	1.70153	0.312318	-5.44807	5.09185e-08	3.27386e-06
ENSG00000175170	FAM182B	64.7584	39.9988	74.8588	38.5313	166.48	237.088	127.719	194.813	1.70057	0.334421	-5.0851	3.6743e-07	1.62702e-05
ENSG00000253213	USP12P1	2.13021	1.17487	2.90358	10.6946	20.9633	9.10052	12.4054	10.5346	1.69974	0.649282	-2.61788	0.00884791	0.0406056
ENSG00000196350	ZNF729	19.3384	13.4148	68.0781	56.5269	96.0632	203.959	84.9903	109.831	1.69877	0.542045	-3.13401	0.00172436	0.0121888
ENSG00000075035	WSCD2	11.0425	6.32653	9.88788	12.4908	37.2614	29.9933	26.5986	19.1539	1.69682	0.449575	-3.77427	0.000160474	0.00207519
ENSG00000150628	SPATA4	7.43368	7.28345	21.1432	15.5475	26.7265	82.2992	22.4938	317.53	1.69587	0.51016	-3.3242	0.00088674	0.00748017
ENSG00000101003	GINS1	61.3961	66.9154	127.705	115.526	286.455	421.153	194.097	279.576	1.69493	0.336687	-5.03413	4.80014e-07	2.03106e-05
ENSG00000104738	MCM4	346.723	227.831	511.632	472.573	1279.96	1741.35	763.325	972.154	1.69223	0.281454	-6.01244	1.8275e-09	1.93896e-07
ENSG00000264235	AP005329.1	2.6701	1.90969	2.89536	2.38116	8.94048	13.4814	2.58086	45.6741	1.69135	0.669833	-2.52503	0.0115689	0.0493522
ENSG00000248431	AC021134.1	32.1425	23.3519	106.151	67.5082	205.394	268.148	84.0428	91.3493	1.69117	0.469638	-3.60101	0.000316979	0.00346505
ENSG00000171848	RRM2	78.9852	86.2446	158.912	109.597	354.976	440.621	255.505	245.116	1.69014	0.273585	-6.17776	6.50189e-10	8.6373e-08
ENSG00000135740	SLC9A5	114.448	75.2843	99.7664	51.1539	300.042	275.772	235.62	164.295	1.68993	0.217675	-7.76356	8.25777e-15	6.98607e-12
ENSG00000175707	KDF1	2.48356	1.42803	20.4661	7.03839	30.5141	29.6442	17.5774	20.4113	1.68987	0.619767	-2.72661	0.00639882	0.0321421
ENSG00000249174	AC106744.1	10.7314	2.59242	26.2582	23.5393	60.5035	72.366	21.4912	25.9283	1.68907	0.609572	-2.77091	0.00559004	0.0291618
ENSG00000185681	MORN5	1.12081	0	10.3816	6.21078	7.81761	27.3188	7.95283	60.2635	1.68797	0.639178	-2.64085	0.00826987	0.0386424
ENSG00000253898	LINC01419	2.10556	5.7874	13.4152	19.5929	38.341	45.3898	16.7861	18.4471	1.68789	0.580954	-2.90537	0.00366822	0.0213132
ENSG00000260193	LINC02846	2.54643	7.73904	17.783	19.5754	44.89	33.1537	39.6318	34.5088	1.6859	0.437927	-3.84974	0.000118244	0.00164916
ENSG00000276131	AC009118.2	2.49776	2.60774	2.23891	5.13788	7.90901	10.6543	12.2241	6.14524	1.68566	0.627122	-2.68793	0.00718965	0.0348669
ENSG00000248215	LINC02505	10.5281	7.11546	16.1212	7.25988	35.3701	37.9576	26.4333	19.6782	1.68529	0.410416	-4.10631	4.02035e-05	0.000722046
ENSG00000260777	AC061975.1	43.9436	38.2285	106.256	76.9263	178.293	312.098	152.846	441.016	1.68433	0.348496	-4.83313	1.34401e-06	4.71003e-05
ENSG00000286207	AC012443.2	26.3681	18.1615	24.8279	31.1773	70.016	114.414	59.796	58.8218	1.68324	0.314495	-5.35219	8.68957e-08	5.03338e-06
ENSG00000248905	FMN1	553.289	520.361	1167.84	1519.38	2908.28	4306.16	1821.35	2018.16	1.68051	0.355288	-4.73001	2.24513e-06	7.13207e-05
ENSG00000108055	SMC3	1123.24	955.84	1389.28	1307.11	3752.9	5272.41	2460.09	2061.11	1.68045	0.235765	-7.12768	1.02075e-12	3.729e-10
ENSG00000182308	DCAF4L1	205.497	162.987	1163.15	1214.3	2627.26	2660.68	1309.78	1172.15	1.67923	0.596058	-2.81723	0.00484402	0.0261768
ENSG00000103599	IQCH	101.854	36.241	143.005	128.95	324.705	444.314	215.233	288.773	1.67742	0.431234	-3.88981	0.000100323	0.0014624
ENSG00000165509	MAGEC3	3.56921	0	9.78074	10.5841	20.3868	25.1703	16.2562	11.9906	1.67634	0.619166	-2.70742	0.00678085	0.0334789
ENSG00000185269	NOTUM	7.71385	4.29892	39.8402	35.4231	96.804	71.1334	41.3806	40.6116	1.67545	0.61483	-2.72506	0.00642903	0.0322636
ENSG00000138182	KIF20B	127.681	121.285	372.981	313.43	679.65	1071.6	485.167	568.896	1.67492	0.372629	-4.49489	6.96073e-06	0.00017945
ENSG00000261008	LINC01572	93.2788	87.6936	124.093	192.899	388.753	572.515	233.259	285.302	1.67397	0.321746	-5.20278	1.96328e-07	9.83108e-06
ENSG00000125966	MMP24	6.14773	11.3984	10.907	5.14196	38.2414	27.6892	13.9765	14.4107	1.67272	0.549854	-3.04212	0.00234916	0.0153873
ENSG00000255428	AP002008.3	7.11003	6.22529	9.61347	7.13309	16.7265	35.4886	20.3194	19.1969	1.67269	0.467127	-3.5808	0.000342538	0.00368168
ENSG00000237268	AC092447.7	71.8315	39.9791	171.379	304.844	558.219	587.527	261.912	290.354	1.67238	0.505715	-3.30695	0.000943163	0.00783079
ENSG00000274893	AL136317.2	15.6382	1.14466	18.9076	6.81032	35.7259	41.1596	26.2023	33.3087	1.67219	0.556643	-3.00407	0.00266396	0.0168882
ENSG00000248724	NPHP3-AS1	6.58199	6.98613	5.87615	12.1377	30.4222	30.9474	15.3159	23.5316	1.67199	0.430228	-3.88628	0.000101791	0.0014751
ENSG00000168350	DEGS2	10.1198	9.14015	15.873	12.4919	33.6102	64.4529	19.612	24.5019	1.67145	0.546722	-3.05721	0.00223405	0.0148083
ENSG00000284946	AC068831.6	31.8582	44.0313	73.2403	78.543	198.775	211.966	136.675	138.641	1.66872	0.280772	-5.94332	2.79303e-09	2.83304e-07
ENSG00000166049	PASD1	68.6681	55.6593	361.444	449.688	943.512	831.152	457.591	380.147	1.66832	0.566619	-2.94435	0.00323634	0.0194798
ENSG00000168135	KCNJ4	3.9169	2.59125	4.52533	13.6937	27.558	14.4511	18.1261	11.8639	1.66759	0.656258	-2.54106	0.0110516	0.0476829
ENSG00000007372	PAX6	28.1312	1.0761	33.1005	19.734	73.1295	75.1925	48.2251	42.8326	1.66668	0.565472	-2.94741	0.00320444	0.0193131
ENSG00000276180	H4C9	17.2004	34.0658	54.4605	43.3449	141.371	116.708	98.3885	85.9287	1.66588	0.384139	-4.33666	1.44663e-05	0.00032459
ENSG00000167077	MEI1	244.147	231.631	420.798	250.419	885.222	1198.52	658.269	681.169	1.66508	0.250029	-6.65956	2.74658e-11	5.69658e-09
ENSG00000249006	AL136360.1	7.20462	7.9527	14.9648	14.486	34.036	54.7339	19.1067	16.3024	1.66329	0.473804	-3.5105	0.000447261	0.00449161
ENSG00000272347	AC116351.2	9.04754	11.7098	9.10746	5.28691	39.7966	17.2134	24.8668	22.3612	1.66159	0.429167	-3.87166	0.000108096	0.00154173
ENSG00000163046	ANKRD30BL	82.4577	65.5902	144.447	66.9767	162.784	492.748	199.364	417.826	1.66158	0.389169	-4.26956	1.95857e-05	0.000413865
ENSG00000285940	AC009899.1	1.62109	6.50998	5.58676	4.88079	16.2656	12.4219	14.4849	9.06992	1.66146	0.651008	-2.55214	0.0107064	0.0465707
ENSG00000138944	SHISAL1	34.85	53.7264	131.362	202.3	378.889	439.741	185.951	187.163	1.6612	0.473467	-3.50859	0.000450495	0.00451732
ENSG00000169989	TIGD4	4.24794	11.7244	14.4836	12.9793	37.9312	41.7378	24.2688	47.0739	1.66112	0.515734	-3.22089	0.00127794	0.00977475
ENSG00000248703	LINC02415	3.81231	2.58391	5.59696	6.18996	25.0355	12.8556	5.66255	18.7607	1.66056	0.633399	-2.62167	0.00875011	0.0402545
ENSG00000156509	FBXO43	73.8326	52.6658	106.695	88.087	225.578	388.707	150.187	261.143	1.66036	0.345395	-4.80714	1.53106e-06	5.23416e-05
ENSG00000253424	AC025437.2	12.3892	8.19023	9.63155	19.1332	41.974	46.7275	29.7743	22.1426	1.66011	0.426846	-3.88926	0.00010055	0.00146465
ENSG00000215045	GRID2IP	15.4593	8.91941	20.7529	27.2273	81.2642	62.8772	28.7097	30.2603	1.65902	0.423178	-3.9204	8.84034e-05	0.00132741
ENSG00000081479	LRP2	47.2626	31.0775	94.9	48.2962	267.445	134.091	124.089	111.17	1.65837	0.588757	-2.81672	0.00485166	0.0262004
ENSG00000164061	BSN	346.208	323.698	633.989	723.795	1845.27	1935.18	1021.64	1166.98	1.65764	0.355485	-4.66303	3.11593e-06	9.25793e-05
ENSG00000278041	AL133325.3	12.7439	9.81711	15.7279	19.2727	57.1274	54.0209	26.4657	32.0776	1.65652	0.423432	-3.91214	9.14835e-05	0.00136284
ENSG00000239511	POM121L7P	76.1455	72.5038	187.286	64.1936	189.199	644.898	111.985	1570.54	1.65492	0.485882	-3.40601	0.000659199	0.0059926
ENSG00000197889	MEIG1	4.23194	7.04291	7.1265	7.02082	9.91784	37.8663	13.2654	21.3714	1.65419	0.603437	-2.74128	0.00612012	0.0310963
ENSG00000259392	AC090877.1	2.43507	2.64706	3.45269	9.99252	20.1966	16.8597	8.35066	11.3199	1.65334	0.597924	-2.76514	0.00568986	0.0295219
ENSG00000100739	BDKRB1	7.52447	6.123	4.60494	12.9857	28.8277	27.7959	18.7068	15.3727	1.65263	0.484022	-3.41436	0.000639317	0.00585237
ENSG00000288235	FAM106C	39.9584	7.26173	96.7543	79.7202	128.167	250.033	150.878	124.097	1.65209	0.584905	-2.82455	0.00473467	0.0257412
ENSG00000276128	AL591441.1	8.48851	5.69326	33.9433	12.9069	26.9061	65.4302	50.6849	65.8732	1.65136	0.587131	-2.81259	0.00491449	0.0264686
ENSG00000197980	LEKR1	24.91	44.6481	51.4985	43.3123	89.3385	198.612	95.6546	189.29	1.65107	0.326529	-5.05644	4.27164e-07	1.84576e-05
ENSG00000165724	ZMYND19	140.125	145.614	332.987	238.075	780.056	770.733	471.162	413.169	1.65085	0.274086	-6.0231	1.71108e-09	1.86467e-07
ENSG00000232190	LINC02181	6.56849	17.1196	9.79314	19.8859	49.5611	54.649	21.2349	32.1466	1.64996	0.450306	-3.6641	0.000248212	0.00287137
ENSG00000173662	TAS1R1	3.43485	4.48178	20.2076	19.2721	40.0483	46.8529	26.2115	30.6046	1.6499	0.535869	-3.07893	0.00207749	0.0140074
ENSG00000175773	ZBTB44-DT	4.42908	9.38259	32.5786	19.435	44.3576	63.5205	43.3959	79.2747	1.64844	0.516261	-3.19303	0.00140787	0.0105333
ENSG00000237605	DYRK3-AS1	2.3348	0	7.40083	11.2301	15.2185	21.2991	14.7088	31.4785	1.64815	0.556062	-2.96398	0.00303693	0.0185989
ENSG00000196787	H2AC11	180.811	171.306	267.898	341.758	780.819	968.993	514.996	509.15	1.64764	0.261189	-6.30822	2.8227e-10	4.34183e-08
ENSG00000199691	RN7SKP173	1.22602	6.77384	6.89616	3.06462	14.2172	21.0949	6.49755	9.25444	1.64726	0.652693	-2.52379	0.0116097	0.0494671
ENSG00000233723	LINC01122	16.191	12.256	58.4865	64.5842	96.7921	157.597	99.0349	87.7416	1.64723	0.457536	-3.60021	0.000317955	0.00347437
ENSG00000237686	AL109615.3	2.47944	8.59589	16.205	7.67058	29.8943	37.1818	18.3691	21.8148	1.647	0.472593	-3.48502	0.000492101	0.00481731
ENSG00000125319	HROB	93.4571	15.214	98.0555	118.128	292.587	302.413	165.552	185.808	1.64543	0.440209	-3.73783	0.000185613	0.00230657
ENSG00000176383	B3GNT4	3.4888	3.41017	20.6768	21.1808	45.9253	42.8777	24.2437	21.5706	1.64503	0.582279	-2.82516	0.00472564	0.0257071
ENSG00000281961	AF067845.4	2.53446	1.34137	5.78579	6.18572	13.9478	17.6803	6.59215	9.42524	1.64342	0.64334	-2.55451	0.0106338	0.0463846
ENSG00000130383	FUT5	1.32276	9.28227	4.37616	5.19231	19.6889	8.6751	18.6034	9.40033	1.6434	0.594893	-2.76251	0.0057359	0.0296841
ENSG00000171847	FAM90A1	12.8213	4.99991	8.89417	12.1063	14.7548	48.7581	29.7506	18.6709	1.64284	0.603453	-2.72239	0.00648107	0.0324336
ENSG00000187772	LIN28B	10.7523	13.4936	84.4471	143.672	209.501	259.405	121.364	130.128	1.64212	0.643214	-2.553	0.01068	0.0465106
ENSG00000158106	RHPN1	46.8654	45.698	68.2567	79.5229	236.085	208.3	121.394	131.798	1.64095	0.293189	-5.59691	2.18206e-08	1.63137e-06
ENSG00000235033	DAAM2-AS1	26.8725	29.8091	26.3477	26.2665	71.2166	126.966	57.2835	54.3448	1.64021	0.508404	-3.2262	0.00125447	0.00965246
ENSG00000141570	CBX8	59.7555	78.1304	143.549	169.672	373.382	392.304	288.682	194.569	1.64007	0.333026	-4.92476	8.44629e-07	3.19449e-05
ENSG00000187775	DNAH17	27.2753	19.1456	118.678	47.5644	134.863	315.262	52.5051	937.517	1.63957	0.562487	-2.91485	0.00355856	0.020857
ENSG00000217702	AC073263.1	13.8702	3.8578	4.69178	8.34927	32.5271	29.9903	9.80494	16.3604	1.63866	0.577709	-2.83648	0.00456133	0.0250534
ENSG00000234832	NXT1-AS1	10.5192	4.9793	7.49328	12.001	19.4594	44.3207	19.2334	20.8607	1.63839	0.481765	-3.4008	0.000671883	0.0060736
ENSG00000229089	ANKRD20A8P	61.8042	66.3025	148.394	129.479	225.44	577.202	146.876	608.794	1.63739	0.423752	-3.86403	0.000111532	0.00157744
ENSG00000184669	OR7E14P	5.09049	5.90705	2.05711	5.77988	18.7704	13.3874	11.3313	22.5431	1.63677	0.507579	-3.22467	0.00126118	0.00969032
ENSG00000273703	H2BC14	23.1212	1.35089	30.1109	45.3099	75.1245	83.4147	77.2823	57.0266	1.63652	0.513679	-3.18588	0.00144314	0.0107022
ENSG00000271781	AC026740.1	7.89002	4.01786	3.48639	2.09062	14.2312	8.12732	17.53	10.9195	1.63573	0.623099	-2.62515	0.00866098	0.0399744
ENSG00000198633	ZNF534	21.8018	15.4715	28.2764	29.3487	63.7115	104.347	54.9702	51.3163	1.63543	0.328256	-4.98218	6.28709e-07	2.51077e-05
[truncated: 2,140 more rows]
