# Supplementary material for: Transcriptome analyses in infertile men reveal germ cell–specific expression and splicing patterns
Source: Life Sci Alliance. 2022 Nov 29;6(2):e202201633. doi: 10.26508/lsa.202201633 (PMC9713473; doi:10.26508/lsa.202201633)
Supplement: Supplementary file 9 [file LSA-2022-01633_TableS9.xlsx]

## Sheet: SPGvsSPC
Table S9: List of DTU genes between spermatogonial vs. spermatocyte arrest groups.
						Proportional isoform usage of the main isoforms (after filtering)
geneID	tx	transcript_id	transcript_type	gene	gene_type	SPG-1 M1570	SPG-2 M1575	SPG-3 M1072	SPG-4 M2822	SPC-1 M1369	SPC-2 M799	SPC-3 M921	MIN_MAX_FILTER	gene_FDR_value	transcript_FDR_value	sig_transcript_dturtle	effect (mean(spg)-mean(spz))	max_positive_effect	min_nagative_effect
A2M-AS1	A2M-AS1-201	ENST00000499762.2	lncRNA	A2M-AS1	lncRNA	0.295992	0.388661	0.295578	0.228342	0	0.0500474	0.204864	1	0.040095	0.334042	FALSE	0.217173	0.217173	-0.360284
A2M-AS1	A2M-AS1-203	ENST00000667950.1	lncRNA	A2M-AS1	lncRNA	0.26115	0.0729065	0.633657	0	0.858705	0.527069	0.420865	0	0.040095	0.0278792	TRUE	-0.360284	0.217173	-0.360284
A4GALT	A4GALT-205	ENST00000483026.2	processed_transcript	A4GALT	protein_coding	0.121528	0.111378	0.0866515	0.117564	0.0470781	0.0302728	0	1	0.0138018	1	FALSE	0.0834967	0.114846	-0.156246
A4GALT	A4GALT-206	ENST00000642412.2	protein_coding	A4GALT	protein_coding	0.331527	0.397378	0.316577	0.381704	0.268459	0.170817	0.286575	1	0.0138018	1	FALSE	0.114846	0.114846	-0.156246
A4GALT	A4GALT-207	ENST00000647439.1	processed_transcript	A4GALT	protein_coding	0.530661	0.491244	0.579959	0.500733	0.603395	0.79891	0.64338	1	0.0138018	0.427533	FALSE	-0.156246	0.114846	-0.156246
AAK1	AAK1-211	ENST00000606389.6	protein_coding	AAK1	protein_coding	0.236327	0.238279	0.223431	0.256266	0.157032	0.186383	0.218168	1	0.00511883	1	FALSE	0.0513815	0.0513815
AARS1	AARS1-201	ENST00000261772.13	protein_coding	AARS1	protein_coding	0.134555	0.352716	0.237975	0.0980379	0	0	0.0875223	1	2.8416e-08	3.31079e-13	TRUE	0.176647	0.176647	-0.0983938
AARS1	AARS1-225	ENST00000675403.1	retained_intron	AARS1	protein_coding	0.190126	0.214135	0.197891	0.244477	0.342435	0.332393	0.255325	1	2.8416e-08	1	FALSE	-0.0983938	0.176647	-0.0983938
ABCA13	ABCA13-202	ENST00000417403.5	nonsense_mediated_decay	ABCA13	protein_coding	0	0	0	0	0.102817	0.0606252	0.0603682	1	0.0114251	1	FALSE	-0.0746035	0.0599641	-0.0746035
ABCA13	ABCA13-205	ENST00000453246.5	nonsense_mediated_decay	ABCA13	protein_coding	0.158635	0.162354	0.21239	0.286313	0.146912	0.144483	0.143482	1	0.0114251	1	FALSE	0.0599641	0.0599641	-0.0746035
ABCB4	ABCB4-202	ENST00000359206.8	protein_coding	ABCB4	protein_coding	0	0	0	0	0.239063	0.483366	0.941651	1	0.000245466	1	FALSE	-0.554694		-0.554694
ABCC11	ABCC11-206	ENST00000565487.1	processed_transcript	ABCC11	protein_coding	0	0	0	0.624787	0.582748	0.319119	0.396003	0	0.0176325	0.0465473	TRUE	-0.276427		-0.276427
ABCC12	ABCC12-205	ENST00000528693.5	retained_intron	ABCC12	protein_coding	0	0	0	0.021902	0.171907	0.22746	0.0722428	1	0.0485245	1	FALSE	-0.151728	0.396329	-0.151728
ABCC12	ABCC12-210	ENST00000533185.1	retained_intron	ABCC12	protein_coding	0.778926	0	0.606128	0.618894	0.313974	0	0	0	0.0485245	0.00956535	TRUE	0.396329	0.396329	-0.151728
ABCC5	ABCC5-202	ENST00000334444.11	protein_coding	ABCC5	protein_coding	0.220658	0.282462	0.222783	0.222913	0.298563	0.314009	0.320181	1	0.000359656	1	FALSE	-0.0737136	0.0736512	-0.0737136
ABCC5	ABCC5-203	ENST00000382494.6	protein_coding	ABCC5	protein_coding	0.0463966	0.0726647	0.0811182	0.146294	0.040164	0.0452655	0.0265985	1	0.000359656	1	FALSE	0.0492756	0.0736512	-0.0737136
ABCC5	ABCC5-206	ENST00000437205.5	nonsense_mediated_decay	ABCC5	protein_coding	0.0641961	0.0530443	0.0633472	0.0551428	0.0944729	0.0744048	0.109409	1	0.000359656	1	FALSE	-0.0338296	0.0736512	-0.0737136
ABCC5	ABCC5-212	ENST00000476402.1	retained_intron	ABCC5	protein_coding	0.0287593	0.0365652	0.0298537	0.0274106	0.0517932	0.0708635	0.0608593	1	0.000359656	1	FALSE	-0.0305248	0.0736512	-0.0737136
ABCC5	ABCC5-213	ENST00000492216.1	processed_transcript	ABCC5	protein_coding	0.152797	0.120981	0.126571	0.12931	0.0704462	0.0409932	0.0648519	1	0.000359656	1	FALSE	0.0736512	0.0736512	-0.0737136
ABCD4	ABCD4-207	ENST00000474270.1	nonsense_mediated_decay	ABCD4	protein_coding	0	0	0	0.0312044	0.0640937	0.0722934	0.0322946	1	0.0348597	1	FALSE	-0.0484261		-0.0484261
ABCF2	ABCF2-201	ENST00000287844.7	protein_coding	ABCF2	protein_coding	0.687277	0.708084	0.540976	0.638989	0.366704	0.475887	0.485325	1	1.61036e-05	0.0591205	FALSE	0.201193	0.201193	-0.147139
ABCF2	ABCF2-202	ENST00000441774.1	protein_coding	ABCF2	protein_coding	0.0201299	0	0.0383456	0.078682	0.0857013	0.0903491	0.105859	1	1.61036e-05	1	FALSE	-0.0596805	0.201193	-0.147139
ABCF2	ABCF2-204	ENST00000473874.1	processed_transcript	ABCF2	protein_coding	0	0	0.0337679	0	0.140536	0.1744	0.151806	1	1.61036e-05	1	FALSE	-0.147139	0.201193	-0.147139
ABCF3	ABCF3-201	ENST00000292808.5	protein_coding	ABCF3	protein_coding	0	0	0	0	0.121251	0.104564	0.0584067	1	0.00311165	1	FALSE	-0.0947405		-0.0947405
ABHD2	ABHD2-201	ENST00000352732.10	protein_coding	ABHD2	protein_coding	0.694554	0.806733	0.662828	0.681319	0.426509	0.428327	0.492829	1	0.00742086	0.0261794	TRUE	0.262137	0.262137	-0.0997898
ABHD2	ABHD2-205	ENST00000565066.5	protein_coding	ABHD2	protein_coding	0	0	0.0157652	0	0.0306559	0.0936626	0.110369	1	0.00742086	1	FALSE	-0.0742878	0.262137	-0.0997898
ABHD2	ABHD2-207	ENST00000565973.5	protein_coding	ABHD2	protein_coding	0.0687336	0.0658966	0.0796421	0.0460355	0.147181	0.249436	0.097983	1	0.00742086	1	FALSE	-0.0997898	0.262137	-0.0997898
ABHD6	ABHD6-203	ENST00000470440.1	retained_intron	ABHD6	protein_coding	0.1796	0.317412	0.155057	0.259828	0.0885807	0	0.106811	1	0.00874095	0.0730131	FALSE	0.162844	0.162844	-0.207997
ABHD6	ABHD6-206	ENST00000480457.1	processed_transcript	ABHD6	protein_coding	0.0997032	0	0.146284	0.0255891	0.41758	0.259429	0.150663	1	0.00874095	0.00417992	TRUE	-0.207997	0.162844	-0.207997
ABI2	ABI2-203	ENST00000261018.12	protein_coding	ABI2	protein_coding	0	0	0.0337317	0.0312352	0.12706	0.220479	0.0732862	1	0.00103194	1	FALSE	-0.124033		-0.124033
ABI2	ABI2-224	ENST00000494215.1	retained_intron	ABI2	protein_coding	0.0508385	0.0870473	0.0835363	0.0383464	0.092972	0.113949	0.0886087	1	0.00103194	1	FALSE	-0.0335676		-0.124033
ABO	ABO-203	ENST00000611156.4	protein_coding	ABO	protein_coding	0.261512	0.294834	0.282033	0.164133	0.12184	0	0	1	0.000543188	7.64122e-06	TRUE	0.210015	0.210015	-0.101911
ABO	ABO-205	ENST00000651471.1	processed_transcript	ABO	protein_coding	0.304464	0.270641	0.320847	0.300475	0.451307	0.325427	0.42632	1	0.000543188	1	FALSE	-0.101911	0.210015	-0.101911
AC004009.1	AC004009.1-202	ENST00000656126.1	lncRNA	AC004009.1	lncRNA	0.136804	0	0	0.193421	0.659753	0.404054	0.690001	1	0.0141021	0.0139021	TRUE	-0.502046		-0.502046
AC004834.1	AC004834.1-205	ENST00000671330.1	lncRNA	AC004834.1	lncRNA	0	0	0.0319868	0	0.123281	0.167262	0.049549	1	0.0116656	1	FALSE	-0.105367		-0.105367
AC006460.1	AC006460.1-202	ENST00000421437.1	lncRNA	AC006460.1	lncRNA	0	0	0.0341536	0.0544539	0.122958	0.114554	0.166507	1	0.023516	1	FALSE	-0.112521	0.318768	-0.112521
AC006460.1	AC006460.1-206	ENST00000674692.1	lncRNA	AC006460.1	lncRNA	0.931424	0.796215	0.516823	0.607678	0.396408	0.316914	0.469479	1	0.023516	0.0400793	TRUE	0.318768	0.318768	-0.112521
AC007342.4	AC007342.4-201	ENST00000566383.2	lncRNA	AC007342.4	lncRNA	0.2577	0.326649	0.238911	0.308248	1	1	0.522027	1	6.89514e-07	0	TRUE	-0.557798	0.557798	-0.557798
AC007342.4	AC007342.4-202	ENST00000565189.1	lncRNA	AC007342.4	lncRNA	0.7423	0.673351	0.761089	0.691752	0	0	0.477973	1	6.89514e-07	0	TRUE	0.557798	0.557798	-0.557798
AC009275.1	AC009275.1-202	ENST00000607945.1	lncRNA	AC009275.1	lncRNA	0	0	0	0	0.536087	0.643048	0.680169	1	0.000120993	1	FALSE	-0.619768		-0.619768
AC009315.1	AC009315.1-201	ENST00000655441.1	lncRNA	AC009315.1	lncRNA	0.494819	0.512725	0.674476	0.21421	0.0875647	0.11872	0.275949	0	0.0162187	0	TRUE	0.313313	0.313313	-0.313313
AC009315.1	AC009315.1-202	ENST00000671641.1	lncRNA	AC009315.1	lncRNA	0.505181	0.487275	0.325524	0.78579	0.912435	0.88128	0.724051	0	0.0162187	0	TRUE	-0.313313	0.313313	-0.313313
AC009403.2	AC009403.2-202	ENST00000636307.1	lncRNA	AC009403.2	lncRNA	0.0310625	0	0	0.0559969	0.124958	0.139326	0.0648905	1	0.0428414	1	FALSE	-0.08796	0.290246	-0.08796
AC009403.2	AC009403.2-210	ENST00000655408.1	lncRNA	AC009403.2	lncRNA	0.921267	0.815981	0.89735	0.794819	0.57915	0.399114	0.723062	1	0.0428414	0.109148	FALSE	0.290246	0.290246	-0.08796
AC009404.1	AC009404.1-201	ENST00000420330.1	lncRNA	AC009404.1	lncRNA	0.206778	0.248633	0.264335	0.197654	0.166219	0.129231	0.132367	1	3.52571e-06	1	FALSE	0.0867443	0.230104	-0.365715
AC009404.1	AC009404.1-203	ENST00000445332.1	lncRNA	AC009404.1	lncRNA	0	0	0	0.262765	0.324227	0.472056	0.497936	1	3.52571e-06	2.26276e-09	TRUE	-0.365715	0.230104	-0.365715
AC009404.1	AC009404.1-205	ENST00000668696.1	lncRNA	AC009404.1	lncRNA	0.546574	0.627547	0.532945	0.41846	0.312813	0.311798	0.279221	1	3.52571e-06	0.208321	FALSE	0.230104	0.230104	-0.365715
AC010198.2	AC010198.2-203	ENST00000648367.1	lncRNA	AC010198.2	lncRNA	0.748899	0.671254	0.700921	0.770216	0	0	0.781265	0	0.000913747	0.000378981	TRUE	0.462401	0.462401
AC010643.1	AC010643.1-202	ENST00000657688.1	lncRNA	AC010643.1	lncRNA	0.785289	0.884594	0.637062	0.601079	0.385203	0.480293	0.497899	1	9.81782e-07	0.0108414	TRUE	0.272541	0.272541	-0.392022
AC010643.1	AC010643.1-203	ENST00000660123.1	lncRNA	AC010643.1	lncRNA	0	0	0.241098	0	0.506248	0.398523	0.452119	1	9.81782e-07	5.7193e-09	TRUE	-0.392022	0.272541	-0.392022
AC015631.1	AC015631.1-204	ENST00000661637.1	lncRNA	AC015631.1	lncRNA	0	0	0	0	0.063802	0.0959041	0.131915	1	0.0361421	1	FALSE	-0.097207		-0.106498
AC015631.1	AC015631.1-212	ENST00000654404.1	lncRNA	AC015631.1	lncRNA	0	0	0.0828767	0	0.149056	0.116302	0.116293	1	0.0361421	1	FALSE	-0.106498		-0.106498
AC015813.1	AC015813.1-203	ENST00000585065.1	lncRNA	AC015813.1	lncRNA	0.617785	0.629723	0.628578	0.666578	0.671681	0.692951	0.683784	1	0.00135544	1	FALSE	-0.0471388		-0.0471388
AC015849.5	AC015849.5-201	ENST00000604907.1	processed_transcript	AC015849.5	transcribed_processed_pseudogene	0.0659841	0.11835	0.0876657	0.0792978	0.17186	0.298883	0.225614	1	1.27848e-05	1	FALSE	-0.144295	0.292149	-0.147854
AC015849.5	AC015849.5-202	ENST00000604647.1	processed_transcript	AC015849.5	transcribed_processed_pseudogene	0.934016	0.88165	0.881875	0.912725	0.689023	0.460519	0.68171	1	1.27848e-05	1.10842e-05	TRUE	0.292149	0.292149	-0.147854
AC015849.5	AC015849.5-203	ENST00000672555.1	transcribed_processed_pseudogene	AC015849.5	transcribed_processed_pseudogene	0	0	0.0304593	0.00797734	0.139117	0.240598	0.0926755	1	1.27848e-05	1	FALSE	-0.147854	0.292149	-0.147854
AC016590.1	AC016590.1-207	ENST00000612804.1	lncRNA	AC016590.1	lncRNA	0.2447	0.362007	0.150926	0.127787	0.0565825	0.058256	0.0539773	1	0.0192366	0.0123562	TRUE	0.165083	0.165083	-0.227167
AC016590.1	AC016590.1-210	ENST00000586442.1	lncRNA	AC016590.1	lncRNA	0.459932	0.292164	0.669194	0.593437	0.7343	0.720593	0.737653	1	0.0192366	0.0232222	TRUE	-0.227167	0.165083	-0.227167
AC020661.1	AC020661.1-201	ENST00000503052.3	lncRNA	AC020661.1	lncRNA	0	0.119619	0.342806	0	1	0.74066	1	1	0.00205058	0	TRUE	-0.797947	0.797947	-0.797947
AC020661.1	AC020661.1-202	ENST00000668282.1	lncRNA	AC020661.1	lncRNA	1	0.880381	0.657194	1	0	0.25934	0	1	0.00205058	0	TRUE	0.797947	0.797947	-0.797947
AC020928.1	AC020928.1-201	ENST00000590750.1	lncRNA	AC020928.1	lncRNA	0.614044	0	0	0	0.925564	0.61261	0.916579	0	0.00489526	0.00201164	TRUE	-0.66474		-0.66474
AC022098.1	AC022098.1-201	ENST00000588387.2	lncRNA	AC022098.1	lncRNA	0.310229	0.373075	0.582958	0.431297	0.187258	0.143824	0.267486	1	0.0131078	0.432811	FALSE	0.224867	0.224867	-0.308402
AC022098.1	AC022098.1-203	ENST00000592086.1	lncRNA	AC022098.1	lncRNA	0.258806	0.203206	0	0	0.524659	0.345827	0.401231	1	0.0131078	0.00217947	TRUE	-0.308402	0.224867	-0.308402
AC025171.2	AC025171.2-201	ENST00000451894.6	lncRNA	AC025171.2	lncRNA	0.0762706	0.0721485	0.0928136	0.0752726	0	0.018594	0.027435	1	0.0153651	1	FALSE	0.0637833	0.0637833
AC026191.1	AC026191.1-203	ENST00000466431.6	lncRNA	AC026191.1	lncRNA	0	0	0	0	0.229044	0.198795	0.227205	1	0.0117914	1	FALSE	-0.218348		-0.218348
AC040970.1	AC040970.1-203	ENST00000668517.1	lncRNA	AC040970.1	lncRNA	0.0401895	0.0497402	0.126719	0.0359924	0.219887	0.243266	0.140046	1	0.00391832	1	FALSE	-0.137906		-0.137906
AC044839.1	AC044839.1-208	ENST00000661164.1	lncRNA	AC044839.1	lncRNA	0	0	0	0	0.16788	0.176813	0.104979	1	9.52227e-14	1	FALSE	-0.149891	0.144565	-0.149891
AC044839.1	AC044839.1-229	ENST00000666738.1	lncRNA	AC044839.1	lncRNA	0.105167	0.160874	0.204964	0.174761	0	0	0.0506297	1	9.52227e-14	1	FALSE	0.144565	0.144565	-0.149891
AC044839.1	AC044839.1-232	ENST00000655580.1	lncRNA	AC044839.1	lncRNA	0.0781038	0.0489316	0.103314	0.0555764	0.180103	0.212928	0.126712	1	9.52227e-14	1	FALSE	-0.101766	0.144565	-0.149891
AC044839.1	AC044839.1-251	ENST00000671473.1	lncRNA	AC044839.1	lncRNA	0	0	0.0159708	0	0.0712718	0.0869272	0.0220192	1	9.52227e-14	1	FALSE	-0.05608	0.144565	-0.149891
AC068620.3	AC068620.3-201	ENST00000636730.1	transcribed_unprocessed_pseudogene	AC068620.3	transcribed_unprocessed_pseudogene	0.283351	0.273105	0.272761	0.379021	0	0	0.222526	1	0.0315228	0	TRUE	0.227884	0.227884	-0.227884
AC068620.3	AC068620.3-202	ENST00000635939.1	processed_transcript	AC068620.3	transcribed_unprocessed_pseudogene	0.716649	0.726895	0.727239	0.620979	1	1	0.777474	1	0.0315228	0	TRUE	-0.227884	0.227884	-0.227884
AC091057.5	AC091057.5-201	ENST00000564902.5	processed_transcript	AC091057.5	protein_coding	0		0.595202	0.221601	1	0.877178	0.899858	1	0.00964411	0	TRUE
AC091057.5	AC091057.5-202	ENST00000563110.6	nonsense_mediated_decay	AC091057.5	protein_coding	1		0.404798	0.778399	0	0.122822	0.100142	1	0.00964411	0	TRUE
AC091180.2	AC091180.2-201	ENST00000502823.6	lncRNA	AC091180.2	lncRNA	0	0	0	0.426327	0.82185	1	0	0	0.0410119	0.0460877	TRUE	-0.500701	0.417774	-0.500701
AC091180.2	AC091180.2-203	ENST00000507337.2	lncRNA	AC091180.2	lncRNA	0.861994	0.883068	0.692592	0.229151	0	0	0.746783	0	0.0410119	0.020347	TRUE	0.417774	0.417774	-0.500701
AC092042.3	AC092042.3-202	ENST00000418093.2	processed_transcript	AC092042.3	protein_coding	0.0951205	0.154209	0.459391	0.550498	0.83836	0.827385	0.56671	1	0.0136277	0	TRUE	-0.429347	0.429347	-0.429347
AC092042.3	AC092042.3-203	ENST00000443313.5	nonsense_mediated_decay	AC092042.3	protein_coding	0.90488	0.845791	0.540609	0.449502	0.16164	0.172615	0.43329	1	0.0136277	0	TRUE	0.429347	0.429347	-0.429347
AC092650.1	AC092650.1-202	ENST00000447571.5	lncRNA	AC092650.1	lncRNA	0.409922	0.437888	0.340109	0.354755	0.188987	0.241889	0.26653	1	0.00205344	1	FALSE	0.1532	0.1532	-0.17452
AC092650.1	AC092650.1-206	ENST00000650704.1	lncRNA	AC092650.1	lncRNA	0	0	0	0	0.038952	0.0825434	0.0801302	1	0.00205344	1	FALSE	-0.0672085	0.1532	-0.17452
AC092650.1	AC092650.1-207	ENST00000661667.1	lncRNA	AC092650.1	lncRNA	0.0429158	0.049075	0.099359	0	0.218889	0.254836	0.193347	1	0.00205344	1	FALSE	-0.17452	0.1532	-0.17452
AC092821.1	AC092821.1-201	ENST00000641639.2	transcribed_unprocessed_pseudogene	AC092821.1	transcribed_unprocessed_pseudogene	0.0391829	0.0571394	0.272455	0.0289169	0.376293	0.382637	0.389983	1	0.000129027	0.0028582	TRUE	-0.283547	0.381039	-0.283547
AC092821.1	AC092821.1-203	ENST00000520314.2	retained_intron	AC092821.1	transcribed_unprocessed_pseudogene	0.960817	0.942861	0.55689	0.971083	0.508984	0.412664	0.508973	1	0.000129027	3.41203e-05	TRUE	0.381039	0.381039	-0.283547
AC093323.1	AC093323.1-202	ENST00000307533.10	nonsense_mediated_decay	AC093323.1	protein_coding	0.342388	0.277658	0.498524	0.417502	0.51516	0.679663	0.533725	1	0.0209543	0.258428	FALSE	-0.192164	0.130127	-0.192164
AC093323.1	AC093323.1-204	ENST00000444232.3	nonsense_mediated_decay	AC093323.1	protein_coding	0.129512	0.350312	0.125233	0.181583	0.0790051	0	0.120593	1	0.0209543	0.00823206	TRUE	0.130127	0.130127	-0.192164
AC093909.4	AC093909.4-201	ENST00000514297.2	lncRNA	AC093909.4	lncRNA	0.0277273	0.0218038	0.190097	0.150571	0.362304	0.422528	0.377875	1	0.00509301	0	TRUE	-0.290019	0.290019	-0.290019
AC093909.4	AC093909.4-202	ENST00000659127.1	lncRNA	AC093909.4	lncRNA	0.972273	0.978196	0.809903	0.849429	0.637696	0.577472	0.622125	1	0.00509301	0	TRUE	0.290019	0.290019	-0.290019
AC097717.1	AC097717.1-222	ENST00000596255.5	lncRNA	AC097717.1	lncRNA	0.366467	0.498757	0.59309	0.319831	0.28667	0.208161	0.269477	1	0.0369342	1	FALSE	0.189767	0.189767	-0.053095
AC097717.1	AC097717.1-229	ENST00000417006.5	lncRNA	AC097717.1	lncRNA	0	0	0	0	0.0761083	0.0562788	0.026898	1	0.0369342	1	FALSE	-0.053095	0.189767	-0.053095
AC099548.2	AC099548.2-203	ENST00000468266.1	processed_transcript	AC099548.2	transcribed_unprocessed_pseudogene	0.0590907	0	0.0530138	0	0.10812	0.267714	0.161183	1	0.00926803	1	FALSE	-0.150979		-0.170127
AC099548.2	AC099548.2-204	ENST00000481651.1	processed_transcript	AC099548.2	transcribed_unprocessed_pseudogene	0.185381	0	0.0624793	0	0.214554	0.237482	0.244241	1	0.00926803	0.220032	FALSE	-0.170127		-0.170127
AC103760.1	AC103760.1-201	ENST00000521326.2	lncRNA	AC103760.1	lncRNA	0.152918	0.354748	0.233592	0.258403	0	0	0	1	0.000349005	1	FALSE	0.249915	0.249915
AC106706.1	AC106706.1-202	ENST00000657492.1	lncRNA	AC106706.1	lncRNA	0.914397	1	0.273819	0.236467	0.104014	0	0	1	0.00271804	0.000198247	TRUE	0.571499	0.571499	-0.522923
AC106706.1	AC106706.1-203	ENST00000654504.1	lncRNA	AC106706.1	lncRNA	0	0	0.0411268	0	0.0465805	0.0920166	0.0689672	1	0.00271804	1	FALSE	-0.0589064	0.571499	-0.522923
AC106706.1	AC106706.1-209	ENST00000653661.1	lncRNA	AC106706.1	lncRNA	0	0	0.638703	0.620565	0.811867	0.836734	0.864619	1	0.00271804	0.022462	TRUE	-0.522923	0.571499	-0.522923
AC106707.1	AC106707.1-201	ENST00000475981.6	lncRNA	AC106707.1	lncRNA	1	1	0.905666	1	0.78562	0.683861	0.688833	1	0.0458263	0.0232061	TRUE	0.256979	0.256979	-0.169797
AC106707.1	AC106707.1-205	ENST00000658486.1	lncRNA	AC106707.1	lncRNA	0	0	0.0943338	0	0.0966128	0.316139	0.16739	1	0.0458263	0.144325	FALSE	-0.169797	0.256979	-0.169797
AC108471.2	AC108471.2-204	ENST00000667934.1	lncRNA	AC108471.2	lncRNA	0	0.0626793	0.158264	0.198205	0.31052	0.38254	0.322277	1	1.55944e-05	0.0364616	TRUE	-0.233659	0.367273	-0.233659
AC108471.2	AC108471.2-207	ENST00000659162.1	lncRNA	AC108471.2	lncRNA	0.645549	0.573651	0.511912	0.47475	0.287918	0	0.264659	1	1.55944e-05	2.56836e-05	TRUE	0.367273	0.367273	-0.233659
AC114757.1	AC114757.1-207	ENST00000669690.1	lncRNA	AC114757.1	lncRNA	0.453076	0.577176	0.544515	1	0.110339	0.0270113	0.243031	1	0.0468677	0.630493	FALSE	0.516898	0.516898
AC116003.1	AC116003.1-201	ENST00000578340.4	lncRNA	AC116003.1	lncRNA	0	0	0.36033	0	0.495635	0.562917	0.429952	1	0.000547416	0.000108181	TRUE	-0.406086	0.434246	-0.406086
AC116003.1	AC116003.1-202	ENST00000647884.1	lncRNA	AC116003.1	lncRNA	0.869449	1	0.63967	1	0.41594	0.400438	0.512725	1	0.000547416	0.000859048	TRUE	0.434246	0.434246	-0.406086
AC124944.2	AC124944.2-201	ENST00000607976.2	processed_transcript	AC124944.2	transcribed_unprocessed_pseudogene	0.225472	0.178074	0.24168	0.161811	0.115497	0.0998267	0.129663	1	0.0246963	1	FALSE	0.0867635	0.0867635	-0.168265
AC124944.2	AC124944.2-204	ENST00000641191.1	transcribed_unprocessed_pseudogene	AC124944.2	transcribed_unprocessed_pseudogene	0.184825	0.360084	0.1763	0.390637	0.476882	0.479933	0.381866	0	0.0246963	0.00544194	TRUE	-0.168265	0.0867635	-0.168265
AC126323.2	AC126323.2-201	ENST00000559985.1	lncRNA	AC126323.2	lncRNA	0.137302	0.169301	0.226135	0.097315	0.27222	0.370693	0.263074	1	6.32305e-07	1	FALSE	-0.144482	0.4699	-0.325418
AC126323.2	AC126323.2-202	ENST00000657134.1	lncRNA	AC126323.2	lncRNA	0	0	0.234995	0	0.416468	0.427204	0.308827	1	6.32305e-07	7.06609e-07	TRUE	-0.325418	0.4699	-0.325418
AC126323.2	AC126323.2-203	ENST00000654663.1	lncRNA	AC126323.2	lncRNA	0.862698	0.830699	0.53887	0.902685	0.311312	0.202103	0.428099	1	6.32305e-07	5.78154e-06	TRUE	0.4699	0.4699	-0.325418
AC139256.1	AC139256.1-201	ENST00000569858.1	processed_transcript	AC139256.1	transcribed_processed_pseudogene	0.520283	1	1	1	0.583225	0.425736	0.281416	0	5.15634e-05	0	TRUE	0.449945	0.449945	-0.449945
AC139256.1	AC139256.1-202	ENST00000646574.1	transcribed_processed_pseudogene	AC139256.1	transcribed_processed_pseudogene	0.479717	0	0	0	0.416775	0.574264	0.718584	0	5.15634e-05	0	TRUE	-0.449945	0.449945	-0.449945
AC139887.2	AC139887.2-201	ENST00000503571.5	lncRNA	AC139887.2	lncRNA	0.0543454	0.0809897	0.0237286	0.0509033	0	0	0	1	0.00898082	1	FALSE	0.0524917	0.0524917
AC244033.2	AC244033.2-201	ENST00000648868.1	lncRNA	AC244033.2	lncRNA	0.606903	0.632253	0.593364	0.659992	0.490783	0.336045	0.460101	1	5.30501e-07	0.0821445	FALSE	0.194152	0.194152	-0.318861
AC244033.2	AC244033.2-203	ENST00000643984.2	lncRNA	AC244033.2	lncRNA	0.131445	0	0	0	0.340431	0.472286	0.242451	1	5.30501e-07	2.85124e-09	TRUE	-0.318861	0.194152	-0.318861
AC245123.1	AC245123.1-201	ENST00000618928.4	lncRNA	AC245123.1	lncRNA	0	0	0	0	0.0928145	0.139796	0.495209	1	0.0158666	1	FALSE	-0.242607		-0.242607
ACLY	ACLY-205	ENST00000588547.1	retained_intron	ACLY	protein_coding	0.0512398	0.086792	0.0807536	0.0435579	0.0117628	0.0385584	0.0368336	1	0.0430955	1	FALSE	0.0365342	0.0365342	-0.0952464
ACLY	ACLY-210	ENST00000592970.1	protein_coding	ACLY	protein_coding	0.0281878	0.0453885	0.0853464	0.0748402	0.168391	0.204779	0.0878907	1	0.0430955	1	FALSE	-0.0952464	0.0365342	-0.0952464
ACOT8	ACOT8-201	ENST00000217455.9	protein_coding	ACOT8	protein_coding	0.642833	0.668904	0.680317	0.46255	0	0.435537	0.386233	1	0.0229758	0.00582946	TRUE	0.339728	0.339728
ACOT9	ACOT9-203	ENST00000379297.5	retained_intron	ACOT9	protein_coding	0.280858	0.251975	0.283813	0.246776	0.328843	0.349834	0.355017	1	0.00322991	1	FALSE	-0.078709	0.180462	-0.119047
ACOT9	ACOT9-204	ENST00000379303.10	protein_coding	ACOT9	protein_coding	0.410567	0.370054	0.374455	0.390459	0.541733	0.527651	0.44691	1	0.00322991	1	FALSE	-0.119047	0.180462	-0.119047
ACOT9	ACOT9-205	ENST00000449612.2	retained_intron	ACOT9	protein_coding	0.295797	0.33032	0.303861	0.253341	0.097157	0.0619017	0.187043	1	0.00322991	0.000212173	TRUE	0.180462	0.180462	-0.119047
ACR	ACR-202	ENST00000527761.1	processed_transcript	ACR	protein_coding	0	0	0.267626	0	0.610854	0.398569	0.621111	1	0.0212319	0.0130539	TRUE	-0.476605	0.312532	-0.476605
ACR	ACR-204	ENST00000533930.1	retained_intron	ACR	protein_coding	0.522568	0.360066	0.348048	0.301773	0	0.0767091	0.135035	1	0.0212319	0.142863	FALSE	0.312532	0.312532	-0.476605
ACSL5	ACSL5-203	ENST00000356116.5	protein_coding	ACSL5	protein_coding	0.84217	0.630817	0.803531	0.499227	0	0	0.678309	0	0.00253621	0.00112607	TRUE	0.467833	0.467833
ACSM3	ACSM3-203	ENST00000501740.6	processed_transcript	ACSM3	protein_coding	0.282298	0.26606	0.242822	0.230835	0.132979	0.122581	0.20913	1	0.012353	1	FALSE	0.100607	0.100607	-0.048285
ACSM3	ACSM3-207	ENST00000562251.5	protein_coding	ACSM3	protein_coding	0.0175015	0.039192	0.0352587	0.0275879	0.0675918	0.0844268	0.0418124	1	0.012353	1	FALSE	-0.0347253	0.100607	-0.048285
ACSM3	ACSM3-209	ENST00000564701.1	protein_coding	ACSM3	protein_coding	0.0575092	0.0556869	0.0679548	0.0187811	0.115383	0.0954124	0.0840083	1	0.012353	1	FALSE	-0.048285	0.100607	-0.048285
ACTR2	ACTR2-204	ENST00000476840.5	nonsense_mediated_decay	ACTR2	protein_coding	0.0470798	0.0610428	0.0126341	0.0351619	0.150728	0.273807	0.0659946	1	0.0494542	1	FALSE	-0.12453		-0.12453
ACTR3B	ACTR3B-201	ENST00000256001.13	protein_coding	ACTR3B	protein_coding	0.155191	0.116349	0.0783682	0.134577	0.191871	0.208985	0.223574	1	0.000549023	1	FALSE	-0.0870219		-0.0870219
ACYP1	ACYP1-203	ENST00000553302.1	protein_coding	ACYP1	protein_coding	0.367401	0.454017	0.503223	0.348873	0.281822	0.226042	0.323366	1	0.0148868	1	FALSE	0.141301	0.141301	-0.192893
ACYP1	ACYP1-206	ENST00000555694.5	protein_coding	ACYP1	protein_coding	0	0	0	0.350686	0.250718	0.163865	0.42711	0	0.0148868	0.00552389	TRUE	-0.192893	0.141301	-0.192893
ADAM9	ADAM9-205	ENST00000481058.2	retained_intron	ADAM9	protein_coding	0.0864654	0.125062	0.123412	0.143675	0.197389	0.22045	0.145358	1	2.08005e-06	1	FALSE	-0.0680789	0.263647	-0.0928076
ADAM9	ADAM9-209	ENST00000487273.7	protein_coding	ADAM9	protein_coding	0.464977	0.504234	0.314746	0.310805	0.119268	0	0.285862	1	2.08005e-06	5.9612e-09	TRUE	0.263647	0.263647	-0.0928076
ADAM9	ADAM9-213	ENST00000676669.1	nonsense_mediated_decay	ADAM9	protein_coding	0.193809	0.156894	0.232183	0.216987	0.257606	0.379124	0.241597	1	2.08005e-06	1	FALSE	-0.0928076	0.263647	-0.0928076
ADAMTS10	ADAMTS10-213	ENST00000601872.1	retained_intron	ADAMTS10	protein_coding	0.217004	0.214231	0.286917	0.219966	0.130828	0	0.123841	1	0.00196511	1	FALSE	0.14964	0.14964
ADAMTS14	ADAMTS14-201	ENST00000373207.2	protein_coding	ADAMTS14	protein_coding	0	1	1	1	0.473106	0	0	0	0.00350474	0	TRUE	0.592298	0.592298	-0.592298
ADAMTS14	ADAMTS14-202	ENST00000373208.5	protein_coding	ADAMTS14	protein_coding	1	0	0	0	0.526894	1	1	0	0.00350474	0	TRUE	-0.592298	0.592298	-0.592298
ADAMTSL1	ADAMTSL1-214	ENST00000546040.1	retained_intron	ADAMTSL1	protein_coding	0	0	0	0	0.299947	0.290522	0.101825	1	0.00476909	1	FALSE	-0.230764		-0.230764
ADAMTSL2	ADAMTSL2-204	ENST00000651351.2	protein_coding	ADAMTSL2	protein_coding	0.0616537	0.185839	0.168412	0.317988	0	0.014503	0	1	0.00324231	0.000413048	TRUE	0.178639	0.178639
ADAR	ADAR-201	ENST00000368471.8	protein_coding	ADAR	protein_coding	0.23724	0.186652	0.212919	0.182073	0.141634	0.153942	0.16858	1	0.00440944	1	FALSE	0.0500022	0.0500022	-0.0235958
ADAR	ADAR-208	ENST00000529168.2	protein_coding	ADAR	protein_coding	0.0972918	0.0733976	0.0855909	0.0750383	0.016828	0.0515127	0.0505804	1	0.00440944	1	FALSE	0.0431893	0.0500022	-0.0235958
ADAR	ADAR-210	ENST00000534279.1	retained_intron	ADAR	protein_coding	0.0479091	0.0463698	0.0509968	0.0562287	0.0689162	0.0819531	0.0710462	1	0.00440944	1	FALSE	-0.0235958	0.0500022	-0.0235958
ADCY10P1	ADCY10P1-201	ENST00000435541.2	processed_transcript	ADCY10P1	transcribed_unprocessed_pseudogene	0.533893	0	0	0	0.396119	0.243712	0.319145	0	0.0109203	0.000956908	TRUE	-0.186186		-0.186186
ADCYAP1R1	ADCYAP1R1-203	ENST00000409363.5	protein_coding	ADCYAP1R1	protein_coding	0.0670885	0.141833	0.11535	0.101759	0	0	0.0396907	1	0.0335774	1	FALSE	0.0932772	0.0932772
ADD3	ADD3-201	ENST00000277900.12	protein_coding	ADD3	protein_coding	0.43234	0.346636	0.334684	0.314986	0.0811405	0.0466101	0.183517	1	1.50364e-12	1.55801e-10	TRUE	0.253406	0.253406	-0.224274
ADD3	ADD3-202	ENST00000356080.9	protein_coding	ADD3	protein_coding	0.0397989	0.0530148	0.0709943	0.074281	0.298916	0.399339	0.153134	1	1.50364e-12	1.92341e-08	TRUE	-0.224274	0.253406	-0.224274
ADD3	ADD3-216	ENST00000488837.1	processed_transcript	ADD3	protein_coding	0.0904139	0.0741983	0.0924735	0.118444	0.1541	0.163811	0.142849	1	1.50364e-12	1	FALSE	-0.0597045	0.253406	-0.224274
ADGRE1	ADGRE1-202	ENST00000312053.9	protein_coding	ADGRE1	protein_coding	0		0	0	0.470013	0.88814	0.69085	1	0.0119837	1	FALSE
ADGRL2	ADGRL2-216	ENST00000468283.1	processed_transcript	ADGRL2	protein_coding	0.181953	0.258241	0.228454	0.27303	0.0949556	0.178646	0.0909251	1	0.0304912	1	FALSE	0.11391	0.11391	-0.0268432
ADGRL2	ADGRL2-231	ENST00000674378.1	processed_transcript	ADGRL2	protein_coding	0.0537599	0.0378115	0.0572292	0.0467386	0.0582103	0.0634288	0.105545	1	0.0304912	1	FALSE	-0.0268432	0.11391	-0.0268432
ADIRF-AS1	ADIRF-AS1-202	ENST00000440490.1	lncRNA	ADIRF-AS1	lncRNA	0.0294422	0	0	0	0.0615635	0.0539894	0.0616312	1	0.0024337	1	FALSE	-0.0517008	0.0593521	-0.0517008
ADIRF-AS1	ADIRF-AS1-203	ENST00000609111.1	lncRNA	ADIRF-AS1	lncRNA	0.298634	0.261694	0.297013	0.29995	0.224047	0.244201	0.221665	1	0.0024337	1	FALSE	0.0593521	0.0593521	-0.0517008
ADPRHL1	ADPRHL1-202	ENST00000375418.7	protein_coding	ADPRHL1	protein_coding	0	0	0	0.278882	0.352808	0.338038	0.0941978	0	0.0119214	0.000944328	TRUE	-0.19196		-0.19196
AEBP2	AEBP2-203	ENST00000398731.3	protein_coding	AEBP2	protein_coding	0.22964	0.252432	0.252591	0.243227	0.296637	0.347778	0.279165	1	0.00111874	1	FALSE	-0.0633872	0.178524	-0.0633872
AEBP2	AEBP2-208	ENST00000673644.1	protein_coding	AEBP2	protein_coding	0.277187	0.260631	0.327294	0.283604	0.0710997	0	0.254867	1	0.00111874	0.000564801	TRUE	0.178524	0.178524	-0.0633872
AFAP1	AFAP1-201	ENST00000358461.6	protein_coding	AFAP1	protein_coding	0.253517	0.255484	0.253892	0.250622	0	0.136775	0.239517	1	0.00525087	1	FALSE	0.127948	0.127948
AFAP1L1	AFAP1L1-201	ENST00000296721.9	protein_coding	AFAP1L1	protein_coding	0.46282	0.414446	0.364571	0.455844	0.613982	0.83438	0.556008	1	0.0243972	0.0925663	FALSE	-0.243703		-0.243703
AFG3L1P	AFG3L1P-217	ENST00000557444.5	transcribed_unitary_pseudogene	AFG3L1P	transcribed_unitary_pseudogene	0.0326809	0.0362149	0.0395631	0.0302057	0.0777064	0.0587771	0.0532362	1	0.0103421	1	FALSE	-0.0285737		-0.0285737
AGBL4	AGBL4-204	ENST00000371839.6	protein_coding	AGBL4	protein_coding	0	0.0382276	0.0264261	0.0389342	0.0749325	0.0772695	0.0655485	1	0.0125426	1	FALSE	-0.0466865	0.326957	-0.220629
AGBL4	AGBL4-205	ENST00000416121.5	protein_coding	AGBL4	protein_coding	0.612496	0.50486	0.39155	0.529715	0.172117	0.161044	0.214934	1	0.0125426	0.0195363	TRUE	0.326957	0.326957	-0.220629
AGBL4	AGBL4-206	ENST00000497451.1	processed_transcript	AGBL4	protein_coding	0.139542	0.260205	0.335919	0.24812	0.459945	0.357143	0.582638	1	0.0125426	0.662665	FALSE	-0.220629	0.326957	-0.220629
AGBL5	AGBL5-202	ENST00000360131.5	protein_coding	AGBL5	protein_coding	0.0298922	0	0.136186	0.130558	0.243118	0.25348	0.22917	1	0.00122947	0.000175591	TRUE	-0.167764	0.0615974	-0.167764
AGBL5	AGBL5-204	ENST00000437006.1	protein_coding	AGBL5	protein_coding	0.11616	0.1261	0.0754855	0.12246	0.0638891	0.0480597	0.0334128	1	0.00122947	1	FALSE	0.0615974	0.0615974	-0.167764
AGO1	AGO1-204	ENST00000674304.1	protein_coding	AGO1	protein_coding	0.541811	0.666371	0.482357	0.456031	0.410345	0.422144	0.446787	1	0.00338353	1	FALSE	0.110217	0.110217
AGPAT1	AGPAT1-203	ENST00000375107.8	protein_coding	AGPAT1	protein_coding	0.899658	0.925586	0.962256	0.982829	0.78827	0.880732	0.862111	1	0.0200034	1	FALSE	0.0988776	0.0988776	-0.0914003
AGPAT1	AGPAT1-205	ENST00000395497.5	protein_coding	AGPAT1	protein_coding	0	0	0.0377438	0.00525603	0.125911	0.105073	0.075467	1	0.0200034	1	FALSE	-0.0914003	0.0988776	-0.0914003
AGPS	AGPS-201	ENST00000264167.11	protein_coding	AGPS	protein_coding	0.468642	0.511749	0.438504	0.540346	0.344949	0.302311	0.404277	1	1.49381e-12	1	FALSE	0.139298	0.139298	-0.239633
AGPS	AGPS-202	ENST00000409888.1	protein_coding	AGPS	protein_coding	0	0	0	0	0.255198	0.339213	0.124489	1	1.49381e-12	1	FALSE	-0.239633	0.139298	-0.239633
AGRN	AGRN-201	ENST00000379370.7	protein_coding	AGRN	protein_coding	0.516419	0.542289	0.451148	0.520527	0.366873	0.44039	0.425939	1	0.0110367	1	FALSE	0.0965286	0.0965286	-0.0574128
AGRN	AGRN-208	ENST00000620552.4	protein_coding	AGRN	protein_coding	0.0153224	0.00340971	0.0209684	0.0258301	0.0763607	0.0736191	0.0484181	1	0.0110367	1	FALSE	-0.04975	0.0965286	-0.0574128
AGRN	AGRN-210	ENST00000652369.1	protein_coding	AGRN	protein_coding	0	0.0124864	0.0318234	0.0192081	0.091865	0.0457696	0.0822422	1	0.0110367	1	FALSE	-0.0574128	0.0965286	-0.0574128
AGTPBP1	AGTPBP1-207	ENST00000491784.3	processed_transcript	AGTPBP1	protein_coding	0.0682672	0.1958	0.0295428	0.0959863	0	0.0114147	0	1	0.00391837	1	FALSE	0.0935942	0.0935942
AHCTF1	AHCTF1-204	ENST00000477526.1	retained_intron	AHCTF1	protein_coding	0.265571	0.111519	0.212673	0.243518	0.063746	0.065225	0.104235	1	9.60701e-05	1	FALSE	0.130585	0.130585	-0.0712723
AHCTF1	AHCTF1-205	ENST00000483900.1	processed_transcript	AHCTF1	protein_coding	0.0271775	0.0450505	0.0362103	0.0346086	0.123751	0.113926	0.083425	1	9.60701e-05	1	FALSE	-0.0712723	0.130585	-0.0712723
AHR	AHR-201	ENST00000242057.9	protein_coding	AHR	protein_coding	0.807294	0.776358	0.774476	0.851584	0.865212	1	1	1	0.00600788	1	FALSE	-0.152643	0.0704208	-0.152643
AHR	AHR-203	ENST00000475440.1	processed_transcript	AHR	protein_coding	0.0363156	0.0639113	0.0955143	0.0859418	0	0	0	1	0.00600788	1	FALSE	0.0704208	0.0704208	-0.152643
AHSA1	AHSA1-201	ENST00000216479.8	protein_coding	AHSA1	protein_coding	0.611382	0.511517	0.698686	0.569989	0.318002	0.240752	0.472191	1	0.01274	0.279952	FALSE	0.254245	0.254245
AIFM1	AIFM1-201	ENST00000287295.8	protein_coding	AIFM1	protein_coding	0.279319	0.258434	0.305071	0.338596	0.13054	0.145387	0.226781	1	0.000665724	1	FALSE	0.127786	0.127786	-0.0575416
AIFM1	AIFM1-213	ENST00000674591.1	retained_intron	AIFM1	protein_coding	0.122461	0.143536	0.159615	0.15319	0.174774	0.214064	0.172492	1	0.000665724	1	FALSE	-0.0424095	0.127786	-0.0575416
AIFM1	AIFM1-227	ENST00000676048.1	retained_intron	AIFM1	protein_coding	0.184777	0.175676	0.162422	0.177047	0.238375	0.267909	0.191282	1	0.000665724	1	FALSE	-0.0575416	0.127786	-0.0575416
AIFM1	AIFM1-229	ENST00000676229.1	protein_coding	AIFM1	protein_coding	0.0733802	0.0748298	0.0696126	0.0746053	0.100015	0.109987	0.0985384	1	0.000665724	1	FALSE	-0.0297399	0.127786	-0.0575416
AJUBA	AJUBA-206	ENST00000553911.1	protein_coding	AJUBA	protein_coding	0.278794	0.162722	0.407849	0.230359	0.106848	0.0820291	0	1	0.0298747	0.016229	TRUE	0.206972	0.206972	-0.172058
AJUBA	AJUBA-207	ENST00000555479.1	retained_intron	AJUBA	protein_coding	0.0981652	0.0771028	0.102332	0.0435144	0.28591	0.259333	0.211765	1	0.0298747	1	FALSE	-0.172058	0.206972	-0.172058
AK2	AK2-212	ENST00000550338.5	nonsense_mediated_decay	AK2	protein_coding	0.0873184	0.156279	0.131699	0.064847	0.217705	0.222162	0.208672	1	0.000501293	1	FALSE	-0.106144		-0.106144
AKT1	AKT1-208	ENST00000554581.5	protein_coding	AKT1	protein_coding	0.0829798	0.087831	0.0787358	0.0794175	0.0508314	0.0205191	0.0564434	1	0.00146426	1	FALSE	0.039643	0.039643	-0.107792
AKT1	AKT1-211	ENST00000554848.5	protein_coding	AKT1	protein_coding	0	0	0	0	0.189191	0.0729353	0.0612506	1	0.00146426	1	FALSE	-0.107792	0.039643	-0.107792
AKT2	AKT2-240	ENST00000584288.5	nonsense_mediated_decay	AKT2	protein_coding	0.0231507	0.104805	0.0620004	0.0860425	0	0	0	1	1.5758e-08	1	FALSE	0.0689997	0.0689997
AL035420.1	AL035420.1-205	ENST00000450129.2	lncRNA	AL035420.1	lncRNA	0	0	0	0	0.150073	0.152059	0.210954	1	0.0227088	1	FALSE	-0.171029		-0.171029
AL121757.1	AL121757.1-202	ENST00000671354.1	lncRNA	AL121757.1	lncRNA	0	0	0	0	0.777433	0.914766	0.0445654	1	0.0470775	1	FALSE	-0.578921		-0.578921
AL133351.4	AL133351.4-201	ENST00000676390.1	lncRNA	AL133351.4	lncRNA	0	0	0	0.752272	1	0.575497	0.613589	0	0.0310625	0	TRUE	-0.541627	0.541627	-0.541627
AL133351.4	AL133351.4-202	ENST00000675225.1	lncRNA	AL133351.4	lncRNA	1	1	1	0.247728	0	0.424503	0.386411	0	0.0310625	0	TRUE	0.541627	0.541627	-0.541627
AL138889.1	AL138889.1-202	ENST00000451317.2	lncRNA	AL138889.1	lncRNA	0	0	0.0465981	0	0.0715088	0.0631428	0.0475735	1	1.95617e-12	1	FALSE	-0.0490922	0.567809	-0.111925
AL138889.1	AL138889.1-203	ENST00000530000.1	lncRNA	AL138889.1	lncRNA	0.984734	1	0.549637	1	0.258124	0.278633	0.410594	1	1.95617e-12	2.59589e-17	TRUE	0.567809	0.567809	-0.111925
AL138889.1	AL138889.1-205	ENST00000661015.1	lncRNA	AL138889.1	lncRNA	0	0	0.0500742	0	0.131927	0.0944446	0.0739308	1	1.95617e-12	1	FALSE	-0.0875822	0.567809	-0.111925
AL138889.1	AL138889.1-206	ENST00000663558.1	lncRNA	AL138889.1	lncRNA	0	0	0.100706	0	0.131858	0.148535	0.122506	1	1.95617e-12	1	FALSE	-0.109123	0.567809	-0.111925
AL138889.1	AL138889.1-209	ENST00000668149.1	lncRNA	AL138889.1	lncRNA	0	0	0.0984295	0	0.138773	0.138367	0.12905	1	1.95617e-12	1	FALSE	-0.110789	0.567809	-0.111925
AL138889.1	AL138889.1-213	ENST00000660621.1	lncRNA	AL138889.1	lncRNA	0.0152662	0	0.0788433	0	0.149824	0.146807	0.109726	1	1.95617e-12	1	FALSE	-0.111925	0.567809	-0.111925
AL138889.1	AL138889.1-216	ENST00000669531.1	lncRNA	AL138889.1	lncRNA	0	0	0.0757116	0	0.117986	0.130071	0.10662	1	1.95617e-12	1	FALSE	-0.0992979	0.567809	-0.111925
AL139393.1	AL139393.1-201	ENST00000417479.2	lncRNA	AL139393.1	lncRNA	0	0	0.0179755	0	0.119123	0.15386	0.0679922	1	0.0096438	0	TRUE	-0.109165	0.109165	-0.109165
AL139393.1	AL139393.1-202	ENST00000664826.1	lncRNA	AL139393.1	lncRNA	1	1	0.982024	1	0.880877	0.84614	0.932008	1	0.0096438	0	TRUE	0.109165	0.109165	-0.109165
AL157935.2	AL157935.2-206	ENST00000548587.1	processed_transcript	AL157935.2	protein_coding	0.452584	0.252455	0.442936	0.228012	0.10783	0.135451	0.160149	1	0.0323859	0.451995	FALSE	0.20952	0.20952
AL162258.1	AL162258.1-202	ENST00000484413.5	lncRNA	AL162258.1	lncRNA	0.181405	0.259293	0.140632	0	0.482682	0.613519	0.544498	1	0.009766	0.00347738	TRUE	-0.401567	0.275717	-0.401567
AL162258.1	AL162258.1-203	ENST00000472233.1	lncRNA	AL162258.1	lncRNA	0.319958	0.491971	0.290035	0.451435	0.0313969	0.182927	0.123573	1	0.009766	0.0902279	FALSE	0.275717	0.275717	-0.401567
AL354733.2	AL354733.2-214	ENST00000590417.5	lncRNA	AL354733.2	lncRNA	0.43416	0.504224	0.375505	0.40272	0.26513	0	0.270967	1	0.0294388	0.00589657	TRUE	0.250453	0.250453
AL359237.1	AL359237.1-202	ENST00000556168.1	lncRNA	AL359237.1	lncRNA	0.0872154	0.047179	0.340277	0.314195	0.517973	0.514992	0.349756	1	0.0416632	0	TRUE	-0.26369	0.26369	-0.26369
AL359237.1	AL359237.1-203	ENST00000554519.1	lncRNA	AL359237.1	lncRNA	0.912785	0.952821	0.659723	0.685805	0.482027	0.485008	0.650244	1	0.0416632	0	TRUE	0.26369	0.26369	-0.26369
AL390726.5	AL390726.5-201	ENST00000637760.1	processed_transcript	AL390726.5	transcribed_unprocessed_pseudogene	0.781136	0.852263	1	1	0.553088	0.414527	0.643379	1	0.0241925	0	TRUE	0.371352	0.371352	-0.371352
AL390726.5	AL390726.5-202	ENST00000635962.1	processed_transcript	AL390726.5	transcribed_unprocessed_pseudogene	0.218864	0.147737	0	0	0.446912	0.585473	0.356621	1	0.0241925	0	TRUE	-0.371352	0.371352	-0.371352
AL390860.1	AL390860.1-201	ENST00000655877.1	lncRNA	AL390860.1	lncRNA	0	0	0.0328874	0.0742659	0.109071	0.174744	0.0807945	1	0.00649801	1	FALSE	-0.0947482	0.141283	-0.0947482
AL390860.1	AL390860.1-208	ENST00000582218.1	lncRNA	AL390860.1	lncRNA	0.983446	1	0.967113	0.925734	0.828322	0.766527	0.88852	1	0.00649801	1	FALSE	0.141283	0.141283	-0.0947482
AL390860.1	AL390860.1-209	ENST00000663177.1	lncRNA	AL390860.1	lncRNA	0.0165543	0	0	0	0.0626065	0.0587287	0.0306858	1	0.00649801	1	FALSE	-0.0465351	0.141283	-0.0947482
AL451069.1	AL451069.1-205	ENST00000455414.2	lncRNA	AL451069.1	lncRNA	0.226182	0	0.212352	0.190712	0.364725	0.276509	0.666356	1	0.0115032	1	FALSE	-0.278552		-0.278552
AL513327.1	AL513327.1-206	ENST00000587696.2	lncRNA	AL513327.1	lncRNA	0	0.023071	0.0156176	0.0194526	0.0687589	0.0732942	0.0409195	1	0.0204331	1	FALSE	-0.0464556	0.17584	-0.0706184
AL513327.1	AL513327.1-208	ENST00000624012.1	lncRNA	AL513327.1	lncRNA	1	0.976929	0.861875	0.921224	0.730201	0.791686	0.770615	1	0.0204331	0.00700498	TRUE	0.17584	0.17584	-0.0706184
AL513327.1	AL513327.1-209	ENST00000628643.2	lncRNA	AL513327.1	lncRNA	0	0	0.024482	0.0464884	0.11271	0.0710186	0.0813539	1	0.0204331	1	FALSE	-0.0706184	0.17584	-0.0706184
AL589740.1	AL589740.1-205	ENST00000635561.1	lncRNA	AL589740.1	lncRNA	0.524418	0.638438	0.476784	0.467195	0.437691	0.362048	0.3617	1	0.0110624	1	FALSE	0.139563	0.139563	-0.123585
AL589740.1	AL589740.1-233	ENST00000658505.1	lncRNA	AL589740.1	lncRNA	0.179283	0.132912	0.168044	0.11938	0.273886	0.318186	0.228397	1	0.0110624	1	FALSE	-0.123585	0.139563	-0.123585
AL589740.1	AL589740.1-249	ENST00000659229.1	lncRNA	AL589740.1	lncRNA	0	0	0	0	0.0736271	0.0325012	0.0693328	1	0.0110624	1	FALSE	-0.058487	0.139563	-0.123585
AL589743.3	AL589743.3-201	ENST00000646225.1	lncRNA	AL589743.3	lncRNA	1	1	0.493994	1	0.497433	0.511339	0.59125	0	0.0463374	0	TRUE	0.340157	0.340157	-0.340157
AL589743.3	AL589743.3-203	ENST00000645684.1	lncRNA	AL589743.3	lncRNA	0	0	0.506006	0	0.502567	0.488661	0.40875	0	0.0463374	0	TRUE	-0.340157	0.340157	-0.340157
AL589843.1	AL589843.1-203	ENST00000656729.1	lncRNA	AL589843.1	lncRNA	0	0	0	0	0.358684	0.839493	0.418009	1	1.14303e-10	1	FALSE	-0.538729	0.514998	-0.538729
AL589843.1	AL589843.1-207	ENST00000653137.1	lncRNA	AL589843.1	lncRNA	0.913941	0.899538	0.901647	0.755851	0.421738	0.0998517	0.536649	1	1.14303e-10	1.21923e-06	TRUE	0.514998	0.514998	-0.538729
AL662884.3	AL662884.3-201	ENST00000497552.5	lncRNA	AL662884.3	lncRNA	0	0	0	0	0.620618	0.453109	0.281369	1	0.00601432	1	FALSE	-0.451699		-0.451699
AL662899.2	AL662899.2-201	ENST00000375880.6	protein_coding	AL662899.2	protein_coding	0	0	0.0497182	0.0608266	0.243439	0.107118	0.084858	1	0.0253847	0	TRUE	-0.117502	0.117502	-0.117502
AL662899.2	AL662899.2-203	ENST00000409691.1	protein_coding	AL662899.2	protein_coding	1	1	0.950282	0.939173	0.756561	0.892882	0.915142	1	0.0253847	0	TRUE	0.117502	0.117502	-0.117502
AL669831.4	AL669831.4-201	ENST00000447500.4	processed_transcript	AL669831.4	transcribed_unprocessed_pseudogene	0.315377	1	1	0.312758	0.276088	0.123868	0.206114	1	0.0298549	0	TRUE	0.45501	0.45501	-0.45501
AL669831.4	AL669831.4-202	ENST00000590817.3	transcribed_unprocessed_pseudogene	AL669831.4	transcribed_unprocessed_pseudogene	0.684623	0	0	0.687242	0.723912	0.876132	0.793886	1	0.0298549	0	TRUE	-0.45501	0.45501	-0.45501
ALB	ALB-216	ENST00000511370.1	protein_coding	ALB	protein_coding	0	0	0	0	0.361737	0.412534	0.33893	1	0.0179327	1	FALSE	-0.371067		-0.371067
ALDH3A2	ALDH3A2-204	ENST00000446398.7	processed_transcript	ALDH3A2	protein_coding	0.0664288	0.0649537	0.0501194	0.0529911	0.0956142	0.110971	0.0755043	1	1.05614e-06	1	FALSE	-0.0354064		-0.0729681
ALDH3A2	ALDH3A2-230	ENST00000672322.1	retained_intron	ALDH3A2	protein_coding	0.0613191	0.0534556	0.0494343	0.0578614	0.11729	0.118167	0.0888816	1	1.05614e-06	1	FALSE	-0.0525954		-0.0729681
ALDH3A2	ALDH3A2-239	ENST00000673064.1	retained_intron	ALDH3A2	protein_coding	0.0879501	0.0694813	0.0905951	0.0910659	0.217494	0.134846	0.120883	1	1.05614e-06	1	FALSE	-0.0729681		-0.0729681
ALDOA	ALDOA-208	ENST00000564521.6	retained_intron	ALDOA	protein_coding	0.032363	0.0431193	0.0410899	0.0445694	0.0694569	0.0791775	0.0448164	1	0.0297188	1	FALSE	-0.0241982		-0.0241982
ALG11	ALG11-201	ENST00000519151.1	processed_transcript	ALG11	protein_coding	0.129161	0.124749	0.140658	0.130936	0.195313	0.165263	0.173283	1	1.05793e-05	1	FALSE	-0.0465766	0.0992129	-0.170771
ALG11	ALG11-204	ENST00000616513.1	protein_coding	ALG11	protein_coding	0.265797	0.263199	0.307494	0.276601	0.472456	0.490135	0.384542	1	1.05793e-05	1	FALSE	-0.170771	0.0992129	-0.170771
ALG11	ALG11-206	ENST00000649651.1	processed_transcript	ALG11	protein_coding	0.0634009	0.0546995	0.157253	0.0993083	0	0.0204736	0	1	1.05793e-05	1	FALSE	0.0868408	0.0992129	-0.170771
ALG11	ALG11-207	ENST00000649708.1	protein_coding	ALG11	protein_coding	0.200686	0.0852298	0.0669798	0.113689	0	0	0.0522997	1	1.05793e-05	1	FALSE	0.0992129	0.0992129	-0.170771
ALG14	ALG14-203	ENST00000507727.2	processed_transcript	ALG14	protein_coding	0	0	0.522147	0	0.655333	0.247904	0.478292	0	0.0150097	0.0193294	TRUE	-0.329973		-0.329973
ALG9	ALG9-207	ENST00000527714.5	retained_intron	ALG9	protein_coding	0.250585	0.265848	0.283637	0.183087	0.0358268	0.139048	0.094133	1	9.30088e-05	1	FALSE	0.15612	0.15612	-0.15016
ALG9	ALG9-211	ENST00000532425.6	protein_coding	ALG9	protein_coding	0.0874654	0.0999358	0.0865219	0.0379221	0.23326	0.11419	0.12615	1	9.30088e-05	1	FALSE	-0.0799055	0.15612	-0.15016
ALG9	ALG9-214	ENST00000614444.4	protein_coding	ALG9	protein_coding	0	0	0.0708266	0	0.147035	0.190809	0.165756	1	9.30088e-05	1	FALSE	-0.15016	0.15612	-0.15016
ALKBH2	ALKBH2-206	ENST00000536720.1	retained_intron	ALKBH2	protein_coding	0	0	0.0768883	0.0489632	0.17771	0.181772	0.113961	1	0.0125735	1	FALSE	-0.126351		-0.126351
ALKBH4	ALKBH4-201	ENST00000292566.4	protein_coding	ALKBH4	protein_coding	0.827694	1	0.818997	0.857239	0.71415	0.806247	0.59111	1	0.00334483	0.122257	FALSE	0.172147	0.172147	-0.235556
ALKBH4	ALKBH4-202	ENST00000490528.1	nonsense_mediated_decay	ALKBH4	protein_coding	0.0701648	0	0	0	0.259183	0.157569	0.342541	1	0.00334483	0.000180638	TRUE	-0.235556	0.172147	-0.235556
ALMS1	ALMS1-207	ENST00000614410.4	protein_coding	ALMS1	protein_coding	0.0587209	0.148888	0.180831	0.132333	0.232161	0.230981	0.33175	1	0.00346016	1	FALSE	-0.134771	0.0219657	-0.134771
ALMS1	ALMS1-208	ENST00000620466.4	retained_intron	ALMS1	protein_coding	0.0615901	0.0776482	0.0747613	0.0870252	0.0556777	0.052434	0.0517598	1	0.00346016	1	FALSE	0.0219657	0.0219657	-0.134771
AMACR	AMACR-203	ENST00000382072.6	protein_coding	AMACR	protein_coding	0.317691	0.267479	0.218123	0.222451	0	0	0	1	0.00205159	1	FALSE	0.256436	0.256436
AMD1	AMD1-203	ENST00000368882.8	protein_coding	AMD1	protein_coding	0.460434	0.120827	0	0.159953	0.477136	0.522731	0.577544	1	0.00192314	0.00742369	TRUE	-0.3405		-0.3405
AMFR	AMFR-204	ENST00000563664.1	protein_coding	AMFR	protein_coding	0	0.17258	0	0	0.217434	0.196152	0.0286015	0	0.0371404	0.00391422	TRUE	-0.104251		-0.104251
AMMECR1	AMMECR1-201	ENST00000262844.10	protein_coding	AMMECR1	protein_coding	0.60257	0.757855	0.538877	0.593204	0.429864	0.383979	0.410533	1	0.00341435	0.174591	FALSE	0.215001	0.215001	-0.26683
AMMECR1	AMMECR1-204	ENST00000473662.1	processed_transcript	AMMECR1	protein_coding	0.0353672	0.103536	0	0.0787759	0.30873	0.477211	0.177808	1	0.00341435	0.000233437	TRUE	-0.26683	0.215001	-0.26683
AMN1	AMN1-201	ENST00000281471.11	protein_coding	AMN1	protein_coding	0.174352	0.185507	0.154202	0.15674	0.123004	0.137975	0.143984	1	0.0125594	1	FALSE	0.0327123	0.0458808	-0.101075
AMN1	AMN1-206	ENST00000535408.5	protein_coding	AMN1	protein_coding	0.0273091	0	0.0291976	0.0412044	0.131913	0.175719	0.0688748	1	0.0125594	1	FALSE	-0.101075	0.0458808	-0.101075
AMN1	AMN1-211	ENST00000541931.5	protein_coding	AMN1	protein_coding	0.0422855	0.0702779	0.0737006	0.0587546	0.0320008	0	0.0141208	1	0.0125594	1	FALSE	0.0458808	0.0458808	-0.101075
ANAPC10	ANAPC10-202	ENST00000451299.6	protein_coding	ANAPC10	protein_coding	0	0	0	0.0211107	0.103872	0.367801	0.134316	1	0.0130297	0.000334899	TRUE	-0.196719	0.058125	-0.196719
ANAPC10	ANAPC10-209	ENST00000507656.6	protein_coding	ANAPC10	protein_coding	0.229476	0.149997	0.190381	0.127864	0.114666	0.109358	0.12489	1	0.0130297	1	FALSE	0.058125	0.058125	-0.196719
ANAPC15	ANAPC15-203	ENST00000502597.2	protein_coding	ANAPC15	protein_coding	0.398474	0.410685	0.364867	0.332364	0.273208	0.256515	0.244532	1	0.0400733	1	FALSE	0.118513	0.118513	-0.116074
ANAPC15	ANAPC15-215	ENST00000545333.5	protein_coding	ANAPC15	protein_coding	0.0242374	0	0.0581308	0.0237956	0.0969541	0.204381	0.126509	1	0.0400733	1	FALSE	-0.116074	0.118513	-0.116074
ANAPC7	ANAPC7-201	ENST00000450008.2	protein_coding	ANAPC7	protein_coding	0.118831	0.0731953	0.141924	0.0989349	0	0	0.0557627	1	0.00146426	1	FALSE	0.0896338	0.0896338	-0.0832776
ANAPC7	ANAPC7-204	ENST00000464697.1	retained_intron	ANAPC7	protein_coding	0.0714353	0.0885499	0.0458677	0	0.143036	0.170535	0.0906517	1	0.00146426	1	FALSE	-0.0832776	0.0896338	-0.0832776
ANGEL2	ANGEL2-202	ENST00000366962.8	protein_coding	ANGEL2	protein_coding	0.0989861	0.106579	0.175886	0.0894592	0.326925	0.353975	0.227822	1	0.000183364	0.00107	TRUE	-0.18518		-0.18518
ANGPT1	ANGPT1-206	ENST00000520734.5	protein_coding	ANGPT1	protein_coding	0	0	0.797667	0	0.755151	0.508621	0.579185	0	0.00366552	0.00128508	TRUE	-0.414902		-0.414902
ANKLE2	ANKLE2-201	ENST00000357997.10	protein_coding	ANKLE2	protein_coding	0.127186	0.135031	0.135897	0.0983888	0.149939	0.184981	0.172533	1	0.0203113	1	FALSE	-0.0450256	0.0384923	-0.0450256
ANKLE2	ANKLE2-203	ENST00000505031.6	retained_intron	ANKLE2	protein_coding	0.239243	0.243977	0.282561	0.247127	0.228395	0.19767	0.218139	1	0.0203113	1	FALSE	0.0384923	0.0384923	-0.0450256
ANKLE2	ANKLE2-205	ENST00000538591.5	retained_intron	ANKLE2	protein_coding	0.115994	0.130447	0.112602	0.115075	0.0880874	0.0639823	0.0967395	1	0.0203113	1	FALSE	0.0355932	0.0384923	-0.0450256
ANKRD30BL	ANKRD30BL-201	ENST00000295181.6	nonsense_mediated_decay	ANKRD30BL	protein_coding	0	0	0.127527	0.0810471	0.205397	0.331425	0.16629	1	0.00279645	0.0111091	TRUE	-0.182227	0.306697	-0.182227
ANKRD30BL	ANKRD30BL-204	ENST00000470729.5	processed_transcript	ANKRD30BL	protein_coding	0.731342	0.658824	0.378458	0.522708	0.350434	0.13352	0.314455	1	0.00279645	0.0121252	TRUE	0.306697	0.306697	-0.182227
ANKRD36C	ANKRD36C-204	ENST00000528268.5	nonsense_mediated_decay	ANKRD36C	protein_coding	0.134036	0.142937	0.162101	0.156512	0.0969012	0.0634312	0.11347	1	5.18321e-05	1	FALSE	0.0576293	0.0576293
ANKRD36C	ANKRD36C-206	ENST00000534304.5	nonsense_mediated_decay	ANKRD36C	protein_coding	0.0638277	0.100818	0.0937088	0.0936417	0.0369785	0.0250747	0.0473409	1	5.18321e-05	1	FALSE	0.0515343	0.0576293
ANKRD49	ANKRD49-207	ENST00000541144.1	protein_coding	ANKRD49	protein_coding	0	0	0	0	0.0705298	0.185112	0.0562347	1	0.000336058	1	FALSE	-0.103959	0.411929	-0.103959
ANKRD49	ANKRD49-210	ENST00000544612.6	protein_coding	ANKRD49	protein_coding	0.525898	0.483464	0.469094	0.575925	0	0.304999	0	1	0.000336058	0.00659803	TRUE	0.411929	0.411929	-0.103959
ANKRD54	ANKRD54-201	ENST00000215941.9	protein_coding	ANKRD54	protein_coding	0.272083	0.290099	0.330935	0.418997	0.42588	0.431122	0.445688	1	0.0108424	1	FALSE	-0.106201		-0.106201
ANKRD7	ANKRD7-201	ENST00000265224.9	protein_coding	ANKRD7	protein_coding	0.0553032	0.0336711	0.470423	0.0753742	0.701868	0.723336	0.541307	1	1.53462e-06	5.80993e-09	TRUE	-0.496811	0.13617	-0.496811
ANKRD7	ANKRD7-203	ENST00000433239.6	processed_transcript	ANKRD7	protein_coding	0.0949933	0.068627	0.0873663	0.129096	0.0505518	0.0174011	0.0195579	1	1.53462e-06	1	FALSE	0.0658503	0.13617	-0.496811
ANKRD7	ANKRD7-207	ENST00000634332.1	processed_transcript	ANKRD7	protein_coding	0.225868	0.224684	0.0683987	0.165767	0.0275297	0.029615	0.0478832	1	1.53462e-06	1	FALSE	0.13617	0.13617	-0.496811
ANLN	ANLN-201	ENST00000265748.7	protein_coding	ANLN	protein_coding	0.496894	0.228183	0.473655	0.573566	0.611571	0.679847	0.616218	1	0.00181786	1	FALSE	-0.192804	0.348668	-0.219429
ANLN	ANLN-202	ENST00000396068.6	protein_coding	ANLN	protein_coding	0.503106	0.771817	0.270518	0.180423	0.07898	0.138044	0.0313702	1	0.00181786	0.165661	FALSE	0.348668	0.348668	-0.219429
ANLN	ANLN-211	ENST00000460598.1	processed_transcript	ANLN	protein_coding	0	0	0	0	0.166909	0.138968	0.352412	1	0.00181786	1	FALSE	-0.219429	0.348668	-0.219429
ANXA2	ANXA2-210	ENST00000558132.5	protein_coding	ANXA2	protein_coding	0.0677283	0.0581333	0.0844021	0.0450838	0	0	0	1	0.00128692	1	FALSE	0.0638369	0.0638369	-0.0355123
ANXA2	ANXA2-240	ENST00000677258.1	retained_intron	ANXA2	protein_coding	0.061642	0.0469537	0.0736317	0.0611066	0.113482	0.0971409	0.0784139	1	0.00128692	1	FALSE	-0.0355123	0.0638369	-0.0355123
ANXA4	ANXA4-201	ENST00000394295.6	protein_coding	ANXA4	protein_coding	0.346972	0.345193	0.33956	0.351503	0.218888	0.15755	0.283598	1	0.00470962	1	FALSE	0.125794	0.125794	-0.182117
ANXA4	ANXA4-203	ENST00000418066.2	processed_transcript	ANXA4	protein_coding	0.160145	0.173903	0.174093	0.237776	0.333182	0.500061	0.272545	1	0.00470962	0.00390897	TRUE	-0.182117	0.125794	-0.182117
ANXA4	ANXA4-205	ENST00000460942.5	processed_transcript	ANXA4	protein_coding	0.0429549	0.0482345	0.0427432	0.0511645	0.0535625	0.0676033	0.0703481	1	0.00470962	1	FALSE	-0.0175637	0.125794	-0.182117
AOC1	AOC1-207	ENST00000493429.5	protein_coding	AOC1	protein_coding	0	0	0	0.230554	0.473	0.706744	0.52756	1	0.0127471	0.00125063	TRUE	-0.511463		-0.511463
AOPEP	AOPEP-201	ENST00000277198.6	protein_coding	AOPEP	protein_coding	0	0	0	0	0.136059	0.181146	0.0383797	1	1.37074e-07	1	FALSE	-0.118528	0.0766619	-0.118528
AOPEP	AOPEP-206	ENST00000445181.5	protein_coding	AOPEP	protein_coding	0.271759	0.221535	0.215484	0.220319	0.167741	0.134491	0.211468	1	1.37074e-07	1	FALSE	0.061041	0.0766619	-0.118528
AOPEP	AOPEP-207	ENST00000451893.5	protein_coding	AOPEP	protein_coding	0.131086	0.165148	0.113029	0.112773	0.0325633	0.0258458	0.103132	1	1.37074e-07	1	FALSE	0.0766619	0.0766619	-0.118528
AP000547.3	AP000547.3-201	ENST00000592918.5	lncRNA	AP000547.3	lncRNA	0.123039	0.267543	0.128375	0.238039	0.113627	0	0.0864186	1	0.0486792	1	FALSE	0.122567	0.122567	-0.21568
AP000547.3	AP000547.3-202	ENST00000592107.5	lncRNA	AP000547.3	lncRNA	0	0	0.244778	0.242635	0.366147	0.398064	0.248388	1	0.0486792	0.0654615	FALSE	-0.21568	0.122567	-0.21568
AP000561.1	AP000561.1-202	ENST00000654607.1	lncRNA	AP000561.1	lncRNA	0.619417	0.945112	0.353099	0.232768	0	0	0.744109	0	0.0131078	0.0287872	TRUE	0.289563	0.289563
AP000829.1	AP000829.1-204	ENST00000581556.1	lncRNA	AP000829.1	lncRNA	0	0	0.200961	0	0.231963	0.430669	0.107714	0	0.00639096	0.00107332	TRUE	-0.206542		-0.206542
AP001931.1	AP001931.1-201	ENST00000534647.2	retained_intron	AP001931.1	protein_coding	0.152705	0.0908171	0.104855	0	0.642608	0.528656	0.270652	1	0.00374511	0	TRUE	-0.393544	0.393544	-0.393544
AP001931.1	AP001931.1-202	ENST00000531074.1	nonsense_mediated_decay	AP001931.1	protein_coding	0.847295	0.909183	0.895145	1	0.357392	0.471344	0.729348	1	0.00374511	0	TRUE	0.393544	0.393544	-0.393544
AP003900.1	AP003900.1-202	ENST00000616952.1	lncRNA	AP003900.1	lncRNA	0	0	0	0	0.197217	0.232573	0.113901	1	0.000908257	1	FALSE	-0.18123	0.229611	-0.18123
AP003900.1	AP003900.1-203	ENST00000667012.1	lncRNA	AP003900.1	lncRNA	0.814168	1	0.655286	0.650327	0.588189	0.546919	0.515894	1	0.000908257	0.159509	FALSE	0.229611	0.229611	-0.18123
AP005264.4	AP005264.4-201	ENST00000592801.5	processed_transcript	AP005264.4	transcribed_processed_pseudogene	0	0.155415	0.149776	0	0.382083	0.402749	0.42268	1	0.000665724	0.000920596	TRUE	-0.326206	0.444965	-0.326206
AP005264.4	AP005264.4-202	ENST00000586642.1	processed_transcript	AP005264.4	transcribed_processed_pseudogene	0.931853	0.844585	0.587017	0.778858	0.356979	0.262357	0.402505	1	0.000665724	0.000136421	TRUE	0.444965	0.444965	-0.326206
AP005329.1	AP005329.1-201	ENST00000578800.6	lncRNA	AP005329.1	lncRNA	1	1	0.56329	1	0	0.340286	0.560115	1	0.0494395	0	TRUE	0.590689	0.590689	-0.590689
AP005329.1	AP005329.1-202	ENST00000581905.2	lncRNA	AP005329.1	lncRNA	0	0	0.43671	0	1	0.659714	0.439885	1	0.0494395	0	TRUE	-0.590689	0.590689	-0.590689
AP1G2	AP1G2-224	ENST00000556741.5	retained_intron	AP1G2	protein_coding	0	0	0	0	0.128014	0.109024	0.145938	1	7.31997e-05	1	FALSE	-0.127659		-0.127659
APBA3	APBA3-201	ENST00000316757.4	protein_coding	APBA3	protein_coding	0.365357	0.376849	0.380664	0.277933	0.186391	0.214132	0.218011	1	0.0419295	1	FALSE	0.144022	0.144022	-0.16133
APBA3	APBA3-204	ENST00000589934.1	retained_intron	APBA3	protein_coding	0	0	0	0.162791	0.283553	0.148901	0.17363	0	0.0419295	0.00130559	TRUE	-0.16133	0.144022	-0.16133
APBB1	APBB1-201	ENST00000299402.10	protein_coding	APBB1	protein_coding	0.557924	0.46207	0.676646	0.346548	0.334151	0.247469	0.333779	1	0.0227551	1	FALSE	0.205664	0.205664	-0.182663
APBB1	APBB1-202	ENST00000311051.7	protein_coding	APBB1	protein_coding	0.0426611	0	0.0211119	0.153103	0.281407	0.241522	0.187717	1	0.0227551	0.0272233	TRUE	-0.182663	0.205664	-0.182663
APEH	APEH-205	ENST00000447436.5	nonsense_mediated_decay	APEH	protein_coding	0.129347	0.113282	0.0850314	0.0874657	0	0	0.0589707	1	3.17298e-06	1	FALSE	0.0841246	0.0841246	-0.0510982
APEH	APEH-216	ENST00000491799.5	retained_intron	APEH	protein_coding	0	0	0	0	0.0325116	0.0623137	0.0584692	1	3.17298e-06	1	FALSE	-0.0510982	0.0841246	-0.0510982
APLP1	APLP1-205	ENST00000588808.5	protein_coding	APLP1	protein_coding	0	0	0	0	0.161299	0.07569	0.0688662	1	0.000261307	1	FALSE	-0.101952	0.278596	-0.101952
APLP1	APLP1-209	ENST00000590926.1	retained_intron	APLP1	protein_coding	0	0	0	0	0.0594519	0.0361294	0.0698891	1	0.000261307	1	FALSE	-0.0551568	0.278596	-0.101952
APLP1	APLP1-211	ENST00000592316.1	protein_coding	APLP1	protein_coding	0.739371	0.735198	0.603248	0.445456	0.340128	0.339975	0.376566	1	0.000261307	1	FALSE	0.278596	0.278596	-0.101952
APLP2	APLP2-201	ENST00000263574.9	protein_coding	APLP2	protein_coding	0.065206	0.0893218	0.107902	0.0818449	0.246417	0.271253	0.159613	1	1.54543e-06	1	FALSE	-0.139693	0.231245	-0.139693
APLP2	APLP2-203	ENST00000338167.10	protein_coding	APLP2	protein_coding	0.443813	0.383845	0.302037	0.291459	0.0359686	0.0577723	0.278391	1	1.54543e-06	2.20195e-07	TRUE	0.231245	0.231245	-0.139693
APLP2	APLP2-205	ENST00000461918.2	retained_intron	APLP2	protein_coding	0.0633197	0.0720057	0.0658158	0.0662259	0.0416523	0.0500332	0.0569469	1	1.54543e-06	1	FALSE	0.0172977	0.231245	-0.139693
APP	APP-201	ENST00000346798.8	protein_coding	APP	protein_coding	0.386617	0.349592	0.382956	0.152138	0	0	0.255607	0	4.59795e-09	1.40565e-08	TRUE	0.232623	0.232623	-0.0295517
APP	APP-215	ENST00000474136.5	processed_transcript	APP	protein_coding	0.0438083	0.0509507	0.0461327	0.0327821	0.088273	0.0691889	0.0614485	1	4.59795e-09	1	FALSE	-0.0295517	0.232623	-0.0295517
APPBP2	APPBP2-201	ENST00000083182.8	protein_coding	APPBP2	protein_coding	0.454216	0.504695	0.450814	0.537055	0.638162	0.639871	0.572859	1	6.42838e-11	1	FALSE	-0.130269	0.200369	-0.130269
APPBP2	APPBP2-202	ENST00000585368.1	protein_coding	APPBP2	protein_coding	0.268332	0.270038	0.228836	0.203842	0	0	0.127178	1	6.42838e-11	3.42179e-13	TRUE	0.200369	0.200369	-0.130269
APPBP2	APPBP2-204	ENST00000589341.5	nonsense_mediated_decay	APPBP2	protein_coding	0.125659	0.0639239	0.123087	0.114435	0.183528	0.244539	0.17516	1	6.42838e-11	1	FALSE	-0.0942995	0.200369	-0.130269
APPBP2	APPBP2-206	ENST00000592995.1	processed_transcript	APPBP2	protein_coding	0.0818567	0.0548805	0.0665958	0.0559693	0.0995521	0.0958373	0.0881385	1	6.42838e-11	1	FALSE	-0.0296838	0.200369	-0.130269
ARAP1	ARAP1-204	ENST00000393609.7	protein_coding	ARAP1	protein_coding	0.0472501	0.0610659	0.0457403	0.0713352	0.1067	0.123804	0.0838203	1	0.0011279	1	FALSE	-0.0484269	0.0591451	-0.0484269
ARAP1	ARAP1-211	ENST00000495878.5	processed_transcript	ARAP1	protein_coding	0.0438849	0.0460439	0.0679913	0.127045	0	0	0.0362888	1	0.0011279	1	FALSE	0.0591451	0.0591451	-0.0484269
ARAP1	ARAP1-218	ENST00000543868.1	retained_intron	ARAP1	protein_coding	0.105599	0.110054	0.152747	0.10496	0.0929498	0.0187829	0.104459	1	0.0011279	1	FALSE	0.0462761	0.0591451	-0.0484269
ARAP3	ARAP3-202	ENST00000504448.1	protein_coding	ARAP3	protein_coding	0.0481577	0.111644	0.174537	0.105433	0.259533	0.236715	0.184215	1	0.00979063	1	FALSE	-0.116878		-0.157919
ARAP3	ARAP3-205	ENST00000513878.5	protein_coding	ARAP3	protein_coding	0.0560787	0.0344639	0.0337445	0	0.0821136	0.29164	0.193219	1	0.00979063	0.0404213	TRUE	-0.157919		-0.157919
ARFIP2	ARFIP2-202	ENST00000396777.8	protein_coding	ARFIP2	protein_coding	0.412718	0.40173	0.32794	0.341011	0.265268	0.177133	0.230976	1	2.40319e-06	1	FALSE	0.146391	0.146391	-0.147249
ARFIP2	ARFIP2-209	ENST00000531037.5	nonsense_mediated_decay	ARFIP2	protein_coding	0	0	0.058683	0	0.0728178	0.270937	0.142005	1	2.40319e-06	1	FALSE	-0.147249	0.146391	-0.147249
ARFIP2	ARFIP2-210	ENST00000614314.4	protein_coding	ARFIP2	protein_coding	0.0665944	0.0655637	0.133792	0.126146	0.138264	0.171495	0.135062	1	2.40319e-06	1	FALSE	-0.0502497	0.146391	-0.147249
ARFRP1	ARFRP1-201	ENST00000424545.2	processed_transcript	ARFRP1	protein_coding	0	0.0665981	0.0850347	0	0.174068	0.145712	0.126401	1	0.00205344	1	FALSE	-0.110819	0.0836198	-0.110819
ARFRP1	ARFRP1-207	ENST00000612157.4	protein_coding	ARFRP1	protein_coding	0.0325697	0.168334	0.0739018	0.0852136	0	0.019155	0	1	0.00205344	1	FALSE	0.0836198	0.0836198	-0.110819
ARFRP1	ARFRP1-208	ENST00000612256.4	protein_coding	ARFRP1	protein_coding	0.141551	0.148412	0.138174	0.12342	0.117944	0.024514	0.105328	1	0.00205344	1	FALSE	0.055294	0.0836198	-0.110819
ARHGAP11A	ARHGAP11A-201	ENST00000361627.8	protein_coding	ARHGAP11A	protein_coding	0.720429	1	0.915149	0.921217	0.578518	0.671435	0.651005	1	0.0114639	0.0890757	FALSE	0.255546	0.255546	-0.197734
ARHGAP11A	ARHGAP11A-206	ENST00000564918.1	retained_intron	ARHGAP11A	protein_coding	0	0	0.0687505	0	0.344258	0.158239	0.142265	1	0.0114639	0.00858465	TRUE	-0.197734	0.255546	-0.197734
ARHGAP21	ARHGAP21-214	ENST00000483114.1	retained_intron	ARHGAP21	protein_coding	0.0755522	0.120788	0.115091	0.128629	0.0175133	0	0.0672425	1	8.90511e-05	1	FALSE	0.081763	0.081763
ARHGAP25	ARHGAP25-202	ENST00000409202.8	protein_coding	ARHGAP25	protein_coding	0.0812387	0.0771123	0.158536	0.102221	0.020032	0	0.0389717	1	0.0110745	1	FALSE	0.0851091	0.0851091
ARHGAP29	ARHGAP29-203	ENST00000482481.1	processed_transcript	ARHGAP29	protein_coding	0.219274	0.212993	0.207208	0.233439	0.175272	0.163123	0.196561	1	0.0233225	1	FALSE	0.03991	0.03991	-0.100654
ARHGAP29	ARHGAP29-205	ENST00000552844.5	nonsense_mediated_decay	ARHGAP29	protein_coding	0.0912566	0.0676893	0.136455	0	0.19183	0.156133	0.175549	1	0.0233225	1	FALSE	-0.100654	0.03991	-0.100654
ARHGAP5	ARHGAP5-202	ENST00000345122.8	protein_coding	ARHGAP5	protein_coding	0.242025	0.213236	0.227121	0.249348	0.180042	0.163912	0.204382	1	0.00314993	1	FALSE	0.050154	0.050154	-0.068127
ARHGAP5	ARHGAP5-210	ENST00000556611.5	protein_coding	ARHGAP5	protein_coding	0.199827	0.169302	0.153002	0.172251	0.240771	0.252712	0.231684	1	0.00314993	1	FALSE	-0.068127	0.050154	-0.068127
ARHGAP6	ARHGAP6-203	ENST00000380717.7	protein_coding	ARHGAP6	protein_coding	0	0	0	0.276442	0.287693	0.136542	0.25309	0	5.84084e-05	0.00400004	TRUE	-0.156664	0.0578998	-0.156664
ARHGAP6	ARHGAP6-206	ENST00000489330.6	retained_intron	ARHGAP6	protein_coding	0.21594	0.161453	0.140418	0.12822	0.100309	0.0892802	0.121234	1	5.84084e-05	1	FALSE	0.0578998	0.0578998	-0.156664
ARHGEF7	ARHGEF7-218	ENST00000491775.5	protein_coding	ARHGEF7	protein_coding	0.191404	0.143515	0.168078	0.179183	0.269804	0.293742	0.226141	1	0.0316464	1	FALSE	-0.0926839		-0.0926839
ARIH1	ARIH1-208	ENST00000566063.1	retained_intron	ARIH1	protein_coding	0.09499	0.0816299	0.082737	0.0851176	0.134182	0.127901	0.0989605	1	0.0366361	1	FALSE	-0.0342292	0.0495409	-0.0342292
ARIH1	ARIH1-210	ENST00000570085.5	nonsense_mediated_decay	ARIH1	protein_coding	0.105916	0.10883	0.112421	0.0835244	0.0625783	0.022867	0.0739507	1	0.0366361	1	FALSE	0.0495409	0.0495409	-0.0342292
ARIH2	ARIH2-205	ENST00000449376.5	protein_coding	ARIH2	protein_coding	0.0338208	0.0226267	0.0318931	0.0126532	0.0933199	0.12406	0.0701006	1	9.08815e-05	1	FALSE	-0.0705785	0.101331	-0.0705785
ARIH2	ARIH2-207	ENST00000452385.5	nonsense_mediated_decay	ARIH2	protein_coding	0.119563	0.121408	0.121871	0.13461	0.156109	0.158149	0.141639	1	9.08815e-05	1	FALSE	-0.0276024	0.101331	-0.0705785
ARIH2	ARIH2-228	ENST00000492077.5	retained_intron	ARIH2	protein_coding	0.391225	0.387075	0.375536	0.41317	0.294703	0.285993	0.290568	1	9.08815e-05	1	FALSE	0.101331	0.101331	-0.0705785
ARMC10	ARMC10-208	ENST00000441711.6	protein_coding	ARMC10	protein_coding	0.171474	0.329665	0.173427	0.23618	0	0.25631	0.0705613	0	0.024669	0.00275172	TRUE	0.118729	0.118729	-0.055832
ARMC10	ARMC10-210	ENST00000479145.1	retained_intron	ARMC10	protein_coding	0.123048	0.119337	0.137847	0.111564	0.185815	0.207915	0.142612	1	0.024669	1	FALSE	-0.055832	0.118729	-0.055832
ARMC6	ARMC6-203	ENST00000392336.7	protein_coding	ARMC6	protein_coding	0.0394778	0	0	0	0.231662	0.238081	0.079865	1	0.000157371	3.86767e-05	TRUE	-0.173333		-0.173333
ARMC6	ARMC6-206	ENST00000535612.6	protein_coding	ARMC6	protein_coding	0.108483	0.0808289	0.128613	0.133438	0.199688	0.252488	0.134783	1	0.000157371	1	FALSE	-0.0828119		-0.173333
ARMC8	ARMC8-203	ENST00000461600.5	protein_coding	ARMC8	protein_coding	0.185621	0.162613	0.291955	0.153975	0	0	0.198197	0	7.31347e-06	2.12898e-05	TRUE	0.132475	0.132475	-0.0711224
ARMC8	ARMC8-214	ENST00000470842.1	retained_intron	ARMC8	protein_coding	0.0290305	0.0350574	0.040109	0	0.0651345	0.167227	0.059153	1	7.31347e-06	1	FALSE	-0.0711224	0.132475	-0.0711224
ARMCX5	ARMCX5-202	ENST00000372742.1	protein_coding	ARMCX5	protein_coding	0.0585227	0	0.0654615	0.089338	0.175865	0.231826	0.101096	1	0.0167028	1	FALSE	-0.116265		-0.116265
ARNTL2	ARNTL2-206	ENST00000539558.1	processed_transcript	ARNTL2	protein_coding	0	0	0.164899	0	0.155155	0.334586	0.38467	0	0.0164495	0.00446945	TRUE	-0.250246	0.301935	-0.250246
ARNTL2	ARNTL2-208	ENST00000544915.5	protein_coding	ARNTL2	protein_coding	1	1	0.7573	0.971015	0.768718	0.57819	0.543524	0	0.0164495	0.00817575	TRUE	0.301935	0.301935	-0.250246
ARRDC3	ARRDC3-204	ENST00000507075.1	retained_intron	ARRDC3	protein_coding	0.114225	0.0856838	0.167126	0.0659401	0	0	0.0471336	1	0.00333006	1	FALSE	0.0925325	0.0925325
ARRDC3-AS1	ARRDC3-AS1-201	ENST00000625713.2	lncRNA	ARRDC3-AS1	lncRNA	0.54567	0.529629	0.585391	0.460729	0.214031	0.33731	0.357514	1	0.00268058	0.0430683	TRUE	0.227404	0.227404	-0.160668
ARRDC3-AS1	ARRDC3-AS1-203	ENST00000630823.2	lncRNA	ARRDC3-AS1	lncRNA	0.0355813	0	0.0542552	0	0.258124	0.203113	0.0881461	1	0.00268058	0.000666277	TRUE	-0.160668	0.227404	-0.160668
ARSA	ARSA-201	ENST00000216124.10	protein_coding	ARSA	protein_coding	0.789851	0.68562	0.725932	0.780577	0.641948	0.518955	0.633417	1	0.0298747	1	FALSE	0.147389	0.147389	-0.0765084
ARSA	ARSA-205	ENST00000453344.6	protein_coding	ARSA	protein_coding	0.025592	0.0307486	0.03522	0.0438886	0.0908947	0.169845	0.0703727	1	0.0298747	1	FALSE	-0.0765084	0.147389	-0.0765084
ART3	ART3-201	ENST00000341029.9	protein_coding	ART3	protein_coding	0.192756	0.0781537	0.43953	0.239629	0.440329	0.536797	0.572423	1	7.90033e-05	0.221335	FALSE	-0.279	0.477895	-0.279
ART3	ART3-213	ENST00000513122.5	protein_coding	ART3	protein_coding	0	0	0.0389407	0	0.0983981	0.0497635	0.0903129	1	7.90033e-05	1	FALSE	-0.0697563	0.477895	-0.279
ART3	ART3-215	ENST00000513494.5	processed_transcript	ART3	protein_coding	0.71895	0.776034	0.252833	0.498079	0.0898756	0.0486343	0.112226	1	7.90033e-05	1.81017e-05	TRUE	0.477895	0.477895	-0.279
ARVCF	ARVCF-201	ENST00000263207.8	protein_coding	ARVCF	protein_coding	0.139255	0.0993011	0.162277	0.134099	0.207029	0.195154	0.263906	1	0.0465658	1	FALSE	-0.0882962		-0.0882962
ARVCF	ARVCF-208	ENST00000480792.1	processed_transcript	ARVCF	protein_coding	0.0491333	0.0460337	0	0	0.0777762	0.0886467	0.0570185	1	0.0465658	1	FALSE	-0.0506887		-0.0882962
ASAH1	ASAH1-257	ENST00000637790.2	protein_coding	ASAH1	protein_coding	0.0880091	0.114544	0.0841192	0.215846	0	0	0	1	0.0234156	1	FALSE	0.12563	0.12563
ASAP1	ASAP1-211	ENST00000521075.5	nonsense_mediated_decay	ASAP1	protein_coding	0.0303371	0	0	0.0493029	0.0718492	0.113378	0.0922463	1	0.000880911	1	FALSE	-0.0725812		-0.0725812
ASB1	ASB1-201	ENST00000264607.9	protein_coding	ASB1	protein_coding	0.73315	0.777297	0.793145	0.6931	0.545628	0.638566	0.554252	1	0.0479047	0.501436	FALSE	0.169691	0.169691	-0.170972
ASB1	ASB1-202	ENST00000409297.1	protein_coding	ASB1	protein_coding	0	0.0543594	0.100804	0.0961482	0.307955	0.143494	0.24995	1	0.0479047	0.0148726	TRUE	-0.170972	0.169691	-0.170972
ASPG	ASPG-201	ENST00000546892.6	protein_coding	ASPG	protein_coding	0.154155	0.35755	0.119025	0.145898	0.0636469	0.117467	0	1	0.00578116	1	FALSE	0.133786	0.133786	-0.207149
ASPG	ASPG-203	ENST00000549809.5	processed_transcript	ASPG	protein_coding	0	0	0	0	0.0266721	0.247386	0.34739	1	0.00578116	1	FALSE	-0.207149	0.133786	-0.207149
ASPH	ASPH-201	ENST00000356457.9	protein_coding	ASPH	protein_coding	0	0	0	0	0.145288	0.118977	0.0403056	1	1.7259e-12	1	FALSE	-0.101524	0.106418	-0.167068
ASPH	ASPH-205	ENST00000445642.6	protein_coding	ASPH	protein_coding	0.0686681	0.0530168	0.0691364	0.055128	0.0264414	0.0299552	0.0357532	1	1.7259e-12	1	FALSE	0.0307707	0.106418	-0.167068
ASPH	ASPH-211	ENST00000518068.5	protein_coding	ASPH	protein_coding	0.147586	0.203303	0.141252	0.110476	0	0.0324767	0.100233	1	1.7259e-12	1	FALSE	0.106418	0.106418	-0.167068
ASPH	ASPH-227	ENST00000523897.5	processed_transcript	ASPH	protein_coding	0.133192	0.11757	0.139497	0.269545	0.334037	0.451795	0.210223	0	1.7259e-12	0.00369894	TRUE	-0.167068	0.106418	-0.167068
ASZ1	ASZ1-201	ENST00000284629.7	protein_coding	ASZ1	protein_coding	0	0	0	0	0.439233	0.322486	0.549654	1	4.06489e-06	1	FALSE	-0.437125	0.358522	-0.437125
ASZ1	ASZ1-204	ENST00000463182.5	retained_intron	ASZ1	protein_coding	1	1	0.552364	0.724559	0.420444	0.559034	0.402647	0	4.06489e-06	0.00280766	TRUE	0.358522	0.358522	-0.437125
ATAD3A	ATAD3A-203	ENST00000378756.8	protein_coding	ATAD3A	protein_coding	0.269648	0.488862	0.364577	0.615354	0.204348	0.152489	0.245744	1	0.00111485	0.263138	FALSE	0.23375	0.23375	-0.137098
ATAD3A	ATAD3A-204	ENST00000400830.4	protein_coding	ATAD3A	protein_coding	0	0.0246579	0.0245243	0.0213929	0.0828242	0.0552378	0.0481327	1	0.00111485	1	FALSE	-0.0444211	0.23375	-0.137098
ATAD3A	ATAD3A-206	ENST00000439513.1	retained_intron	ATAD3A	protein_coding	0.23541	0.135902	0	0	0.229364	0.245709	0.214704	0	0.00111485	0.0031118	TRUE	-0.137098	0.23375	-0.137098
ATE1	ATE1-203	ENST00000369043.8	protein_coding	ATE1	protein_coding	0.334401	0.363068	0.335359	0.253001	0.248846	0	0.322568	0	0.00663544	0.0151419	TRUE	0.130986	0.130986	-0.0785207
ATE1	ATE1-206	ENST00000540606.6	protein_coding	ATE1	protein_coding	0.0536046	0.0221547	0.109042	0.0858737	0.160466	0.162007	0.116095	1	0.00663544	1	FALSE	-0.0785207	0.130986	-0.0785207
ATF1	ATF1-201	ENST00000262053.8	protein_coding	ATF1	protein_coding	0.817049	0.770008	0.642563	0.589714	0.583311	0.58657	0.580803	1	0.0476958	1	FALSE	0.121272	0.121272	-0.170226
ATF1	ATF1-204	ENST00000552487.1	protein_coding	ATF1	protein_coding	0.0192543	0	0.115284	0.110388	0.31161	0.177095	0.205669	1	0.0476958	0.0099614	TRUE	-0.170226	0.121272	-0.170226
ATF2	ATF2-201	ENST00000264110.7	protein_coding	ATF2	protein_coding	0.453742	0.432029	0.584557	0.461477	0.356043	0.2453	0.378421	1	0.00166208	0.0373832	TRUE	0.156363	0.156363	-0.082137
ATF2	ATF2-202	ENST00000345739.9	protein_coding	ATF2	protein_coding	0.157452	0.195297	0.105797	0.130175	0.21027	0.251849	0.199062	1	0.00166208	1	FALSE	-0.0732132	0.156363	-0.082137
ATF2	ATF2-213	ENST00000428760.5	nonsense_mediated_decay	ATF2	protein_coding	0.0257953	0.029418	0.0313495	0	0.0886999	0.153434	0.0691987	1	0.00166208	1	FALSE	-0.082137	0.156363	-0.082137
ATF7	ATF7-207	ENST00000551087.1	processed_transcript	ATF7	protein_coding	0.0570579	0.0307946	0.0357496	0.0276971	0.165582	0.0963715	0.0899654	1	0.00388682	1	FALSE	-0.0794815	0.0802561	-0.0794815
ATF7	ATF7-208	ENST00000551480.2	protein_coding	ATF7	protein_coding	0.110507	0.0595187	0.0726622	0.0783366	0	0	0	1	0.00388682	1	FALSE	0.0802561	0.0802561	-0.0794815
ATF7-NPFF	ATF7-NPFF-201	ENST00000448979.3	retained_intron	ATF7-NPFF	protein_coding	0.908923	1	1	1	0.747266	0.737091	0.962296	0	0.0287611	0	TRUE	0.16168	0.16168	-0.16168
ATF7-NPFF	ATF7-NPFF-202	ENST00000591834.1	protein_coding	ATF7-NPFF	protein_coding	0.0910773	0	0	0	0.252734	0.262909	0.0377037	0	0.0287611	0	TRUE	-0.16168	0.16168	-0.16168
ATG16L2	ATG16L2-211	ENST00000538842.1	processed_transcript	ATG16L2	protein_coding	0.200052	0.148416	0.161463	0.14155	0	0.0796715	0.134979	1	0.0366614	1	FALSE	0.0913203	0.0913203
ATG4B	ATG4B-205	ENST00000404914.8	protein_coding	ATG4B	protein_coding	0.172683	0.162186	0.148185	0.155728	0.055048	0.0526394	0.144132	1	0.0140409	1	FALSE	0.0757558	0.0757558
ATG4B	ATG4B-219	ENST00000479941.1	retained_intron	ATG4B	protein_coding	0.192258	0.152709	0.144329	0.146698	0.111616	0.116942	0.0886697	1	0.0140409	1	FALSE	0.0532563	0.0757558
ATG7	ATG7-213	ENST00000446450.6	protein_coding	ATG7	protein_coding	0.119257	0.080759	0.100799	0.0662161	0.153185	0.143827	0.121093	1	0.00182122	1	FALSE	-0.0476105	0.089388	-0.0484003
ATG7	ATG7-215	ENST00000451830.5	protein_coding	ATG7	protein_coding	0.152722	0.129988	0.0539731	0.139193	0.0353359	0.0194835	0.0339235	1	0.00182122	1	FALSE	0.089388	0.089388	-0.0484003
ATG7	ATG7-216	ENST00000460291.1	retained_intron	ATG7	protein_coding	0.189519	0.178023	0.143572	0.184134	0.205196	0.234029	0.227412	1	0.00182122	1	FALSE	-0.0484003	0.089388	-0.0484003
ATG7	ATG7-217	ENST00000460444.5	processed_transcript	ATG7	protein_coding	0	0.0233675	0.0265434	0.029086	0.0574084	0.0578057	0.0384231	1	0.00182122	1	FALSE	-0.0314632	0.089388	-0.0484003
ATL1	ATL1-201	ENST00000358385.12	protein_coding	ATL1	protein_coding	0.230602	0.142126	0.0824218	0.058314	0	0.0158139	0	1	0.000776718	1	FALSE	0.123095	0.123095	-0.103715
ATL1	ATL1-202	ENST00000441560.6	protein_coding	ATL1	protein_coding	0	0	0.0160141	0	0.108428	0.151624	0.0631032	1	0.000776718	1	FALSE	-0.103715	0.123095	-0.103715
ATL1	ATL1-209	ENST00000556478.2	protein_coding	ATL1	protein_coding	0.0180415	0.0206426	0	0.0548433	0.0659433	0.226987	0.084378	1	0.000776718	1	FALSE	-0.102387	0.123095	-0.103715
ATP13A3	ATP13A3-203	ENST00000446356.1	protein_coding	ATP13A3	protein_coding	0.0552716	0.0663823	0.0752566	0.0490459	0.0302213	0.0226271	0.0415718	1	2.09634e-05	1	FALSE	0.0300157	0.0639028	-0.135268
ATP13A3	ATP13A3-206	ENST00000485194.1	retained_intron	ATP13A3	protein_coding	0.103367	0.124942	0.116196	0.126506	0.208315	0.195579	0.213432	1	2.09634e-05	1	FALSE	-0.0880226	0.0639028	-0.135268
ATP13A3	ATP13A3-207	ENST00000492983.1	retained_intron	ATP13A3	protein_coding	0.0380484	0.0506539	0.0711647	0.108202	0.037958	0.0377419	0.0263636	1	2.09634e-05	1	FALSE	0.0329962	0.0639028	-0.135268
ATP13A3	ATP13A3-208	ENST00000497567.1	retained_intron	ATP13A3	protein_coding	0.175324	0.118301	0.144761	0.0897296	0.0495527	0.0655527	0.0892735	1	2.09634e-05	1	FALSE	0.0639028	0.0639028	-0.135268
ATP13A3	ATP13A3-211	ENST00000645538.1	protein_coding	ATP13A3	protein_coding	0.0598688	0.126501	0	0	0.21893	0.257992	0.0686582	0	2.09634e-05	9.88318e-06	TRUE	-0.135268	0.0639028	-0.135268
ATP1A3	ATP1A3-201	ENST00000441343.5	non_stop_decay	ATP1A3	protein_coding	0	0.00869723	0.032768	0	0.0752883	0.105798	0.086769	1	0.0202615	1	FALSE	-0.0789188	0.0661191	-0.0789188
ATP1A3	ATP1A3-213	ENST00000645448.1	retained_intron	ATP1A3	protein_coding	0.194034	0.176996	0.233804	0.16043	0.133606	0.140068	0.101916	1	0.0202615	1	FALSE	0.0661191	0.0661191	-0.0789188
ATP23	ATP23-205	ENST00000647763.1	processed_transcript	ATP23	protein_coding	0	0	0	0.473413	0.389164	0.590123	0.68067	0	0.0184536	0.00284419	TRUE	-0.434966		-0.434966
ATP2A1	ATP2A1-202	ENST00000395503.9	protein_coding	ATP2A1	protein_coding	0.114744	0.159467	0.129399	0.0958449	0	0	0	1	0.00577218	1	FALSE	0.124864	0.134177	-0.0985782
ATP2A1	ATP2A1-203	ENST00000536376.5	protein_coding	ATP2A1	protein_coding	0	0	0	0	0.0207639	0.196621	0.0783492	1	0.00577218	1	FALSE	-0.0985782	0.134177	-0.0985782
ATP2A1	ATP2A1-205	ENST00000563975.1	protein_coding	ATP2A1	protein_coding	0.281839	0.401158	0.205396	0.25134	0.125742	0.1818	0.144725	1	0.00577218	1	FALSE	0.134177	0.134177	-0.0985782
ATP2A2	ATP2A2-203	ENST00000377685.9	nonsense_mediated_decay	ATP2A2	protein_coding	0.0371618	0.0648388	0.142281	0.0699174	0.172114	0.247936	0.191226	1	1.18142e-08	1	FALSE	-0.125209	0.175402	-0.125209
ATP2A2	ATP2A2-204	ENST00000539276.7	protein_coding	ATP2A2	protein_coding	0.343566	0.300153	0.301843	0.368865	0.136525	0.111399	0.211691	1	1.18142e-08	2.03287e-06	TRUE	0.175402	0.175402	-0.125209
ATP2A2	ATP2A2-205	ENST00000547050.1	retained_intron	ATP2A2	protein_coding	0.080014	0.0930045	0.0551872	0.0622038	0.0423886	0.036952	0.0549178	1	1.18142e-08	1	FALSE	0.0278496	0.175402	-0.125209
ATP2A2	ATP2A2-209	ENST00000550248.2	processed_transcript	ATP2A2	protein_coding	0.0873695	0.165845	0.0869985	0.0928071	0.0609994	0.0344976	0.0704581	1	1.18142e-08	1	FALSE	0.0529367	0.175402	-0.125209
ATP5F1A	ATP5F1A-202	ENST00000398752.11	protein_coding	ATP5F1A	protein_coding	0.0550524	0.0441107	0.0509022	0.0508952	0.0773804	0.0777851	0.0591724	1	0.000472212	1	FALSE	-0.0212058		-0.0313622
ATP5F1A	ATP5F1A-209	ENST00000589611.1	retained_intron	ATP5F1A	protein_coding	0.0424678	0.0281154	0.026175	0.0363819	0.0694093	0.0588205	0.0657119	1	0.000472212	1	FALSE	-0.0313622		-0.0313622
ATP5MG	ATP5MG-204	ENST00000529460.1	processed_transcript	ATP5MG	protein_coding	0.416225	0.278368	0.392194	0.211965	0	0	0.360481	0	0.00161348	0.000275601	TRUE	0.204528	0.204528	-0.0437771
ATP5MG	ATP5MG-208	ENST00000534385.1	retained_intron	ATP5MG	protein_coding	0.0239332	0.0116938	0.0217027	0.0218465	0.0690831	0.0950682	0.0265619	1	0.00161348	1	FALSE	-0.0437771	0.204528	-0.0437771
ATP5PD	ATP5PD-201	ENST00000301587.9	protein_coding	ATP5PD	protein_coding	0.953806	0.936555	0.922116	0.898819	0.754726	0.872868	0.857157	1	0.0445016	1	FALSE	0.0995738	0.0995738	-0.0666406
ATP5PD	ATP5PD-202	ENST00000344546.8	protein_coding	ATP5PD	protein_coding	0.00832025	0.0199384	0.0102188	0.02414	0.127623	0.0579331	0.0613289	1	0.0445016	1	FALSE	-0.0666406	0.0995738	-0.0666406
ATP6AP2	ATP6AP2-217	ENST00000636580.2	protein_coding	ATP6AP2	protein_coding	0.36578	0.449679	0.345137	0.500449	0.517037	0.58858	0.52746	1	0.00830494	1	FALSE	-0.129098		-0.129098
ATP6V0E1	ATP6V0E1-202	ENST00000517669.1	protein_coding	ATP6V0E1	protein_coding	0.150151	0.111958	0.123532	0.13024	0.0836664	0	0.0660171	1	0.0154347	1	FALSE	0.079076	0.079076
ATP6V1D	ATP6V1D-201	ENST00000216442.12	protein_coding	ATP6V1D	protein_coding	0.555975	0.551483	0.503056	0.56846	0.23821	0.347772	0.366593	1	0.00427882	0.0001044	TRUE	0.227218	0.227218	-0.0950016
ATP6V1D	ATP6V1D-204	ENST00000553974.1	processed_transcript	ATP6V1D	protein_coding	0.0713826	0.0559239	0.0788712	0.0589815	0.0974678	0.143544	0.131386	1	0.00427882	1	FALSE	-0.0578428	0.227218	-0.0950016
ATP6V1D	ATP6V1D-205	ENST00000554087.5	nonsense_mediated_decay	ATP6V1D	protein_coding	0.2523	0.229091	0.226518	0.218714	0.404679	0.280961	0.294333	1	0.00427882	1	FALSE	-0.0950016	0.227218	-0.0950016
ATP6V1G1	ATP6V1G1-204	ENST00000677452.1	protein_coding	ATP6V1G1	protein_coding	0.405671	0.279158	0.234387	0.297102	0	0.00956269	0.108553	1	7.52675e-08	1.96949e-10	TRUE	0.264708	0.264708
ATP8A1	ATP8A1-203	ENST00000504024.1	nonsense_mediated_decay	ATP8A1	protein_coding	0	0	0	0	0.149451	0.0804419	0.0518811	1	0.00428806	1	FALSE	-0.0939246		-0.0939246
ATP8A2	ATP8A2-202	ENST00000281620.10	nonsense_mediated_decay	ATP8A2	protein_coding	0	0	0.0494011	0.0729862	0.464985	0.499433	0.359739	1	6.48824e-06	1.33613e-05	TRUE	-0.410789	0.525182	-0.410789
ATP8A2	ATP8A2-204	ENST00000381655.7	protein_coding	ATP8A2	protein_coding	1	1	0.502283	0.602943	0.264	0.192013	0.29736	1	6.48824e-06	8.20351e-07	TRUE	0.525182	0.525182	-0.410789
ATPAF1	ATPAF1-203	ENST00000460928.1	retained_intron	ATPAF1	protein_coding	0.071415	0.088726	0.0726155	0.0587669	0.113097	0.158508	0.125592	1	1.40523e-05	1	FALSE	-0.0595181	0.185117	-0.0749216
ATPAF1	ATPAF1-205	ENST00000487193.1	nonsense_mediated_decay	ATPAF1	protein_coding	0	0	0	0.0229653	0.0886008	0.0789867	0.0744013	1	1.40523e-05	1	FALSE	-0.0749216	0.185117	-0.0749216
ATPAF1	ATPAF1-213	ENST00000574428.5	protein_coding	ATPAF1	protein_coding	0.576538	0.469603	0.484086	0.45877	0.276545	0.32978	0.33007	1	1.40523e-05	0.00413473	TRUE	0.185117	0.185117	-0.0749216
ATRIP	ATRIP-202	ENST00000346691.9	protein_coding	ATRIP	protein_coding	0.195122	0	0	0	0.201621	0.195615	0.288394	1	0.000983559	0.00223119	TRUE	-0.179763		-0.179763
ATXN1	ATXN1-202	ENST00000436367.6	protein_coding	ATXN1	protein_coding	0.227243	0.178383	0.244583	0.191882	0.261062	0.289423	0.247597	1	1.31038e-10	1	FALSE	-0.0555047	0.101888	-0.0555047
ATXN1	ATXN1-205	ENST00000479680.1	processed_transcript	ATXN1	protein_coding	0.144382	0.232487	0.144703	0.163181	0.113467	0.0580325	0.121904	1	1.31038e-10	1	FALSE	0.0733875	0.101888	-0.0555047
ATXN1	ATXN1-210	ENST00000498374.1	processed_transcript	ATXN1	protein_coding	0.0209692	0.0258278	0.0328221	0.0226091	0.0371109	0.0937367	0.0664226	1	1.31038e-10	1	FALSE	-0.0401997	0.101888	-0.0555047
ATXN1	ATXN1-211	ENST00000642969.1	protein_coding	ATXN1	protein_coding	0.149062	0.120471	0.0991342	0.038887	0	0	0	1	1.31038e-10	1	FALSE	0.101888	0.101888	-0.0555047
ATXN2L	ATXN2L-208	ENST00000562583.5	nonsense_mediated_decay	ATXN2L	protein_coding	0.0185103	0.0134306	0.0418276	0.0213684	0.0527602	0.0931936	0.0752845	1	0.0465658	1	FALSE	-0.0499619	0.0229705	-0.0499619
ATXN2L	ATXN2L-212	ENST00000564035.5	retained_intron	ATXN2L	protein_coding	0.0691233	0.051926	0.0565831	0.0720659	0.0401091	0.0294799	0.0487732	1	0.0465658	1	FALSE	0.0229705	0.0229705	-0.0499619
AURKAIP1	AURKAIP1-201	ENST00000321751.9	protein_coding	AURKAIP1	protein_coding	0.155214	0.0769642	0.151899	0.0627968	0.344838	0.401915	0.237588	1	0.000634894	1.78865e-05	TRUE	-0.216395	0.14527	-0.216395
AURKAIP1	AURKAIP1-204	ENST00000378853.3	protein_coding	AURKAIP1	protein_coding	0.390948	0.566736	0.436898	0.552961	0.336415	0.330736	0.357695	1	0.000634894	1	FALSE	0.14527	0.14527	-0.216395
AZI2	AZI2-202	ENST00000334100.10	protein_coding	AZI2	protein_coding	0.0389198	0.0910316	0.0258475	0.0892313	0.114109	0.167197	0.179337	1	0.0256167	1	FALSE	-0.0922899	0.0549003	-0.0922899
AZI2	AZI2-205	ENST00000420543.6	protein_coding	AZI2	protein_coding	0.154431	0.193703	0.252744	0.244902	0.363695	0.254358	0.272561	1	0.0256167	1	FALSE	-0.0854261	0.0549003	-0.0922899
AZI2	AZI2-212	ENST00000479665.6	protein_coding	AZI2	protein_coding	0.102557	0.0459316	0.0579411	0.0546216	0.0299699	0.0283852	0.014725	1	0.0256167	1	FALSE	0.0409027	0.0549003	-0.0922899
AZI2	AZI2-213	ENST00000488978.1	retained_intron	AZI2	protein_coding	0.0908954	0.0520522	0.0984121	0.0882044	0.0342603	0	0.0482118	1	0.0256167	1	FALSE	0.0549003	0.0549003	-0.0922899
AZIN2	AZIN2-201	ENST00000294517.11	protein_coding	AZIN2	protein_coding	0.444469	0.38654	0.357838	0.534806	0.256032	0.284999	0.21494	1	8.6606e-05	1	FALSE	0.178923	0.178923	-0.268119
AZIN2	AZIN2-218	ENST00000497280.1	processed_transcript	AZIN2	protein_coding	0	0	0	0	0.293259	0.320057	0.191041	1	8.6606e-05	1	FALSE	-0.268119	0.178923	-0.268119
BAIAP2	BAIAP2-222	ENST00000575841.5	protein_coding	BAIAP2	protein_coding	0.131652	0.126782	0.133985	0.212696	0.0808936	0.117678	0.0997023	1	0.00285648	1	FALSE	0.051854	0.051854	-0.116377
BAIAP2	BAIAP2-227	ENST00000576470.5	retained_intron	BAIAP2	protein_coding	0	0	0.0501829	0	0.0678665	0.132101	0.186799	1	0.00285648	1	FALSE	-0.116377	0.051854	-0.116377
BANP	BANP-206	ENST00000423252.5	protein_coding	BANP	protein_coding	0.176128	0.197126	0.194445	0.240199	0.142233	0.111708	0.173734	1	0.00254527	1	FALSE	0.0594161	0.0594161	-0.0654087
BANP	BANP-216	ENST00000474563.2	processed_transcript	BANP	protein_coding	0.073944	0.0782945	0.0690206	0.113458	0.0677161	0.0316322	0.0366253	1	0.00254527	1	FALSE	0.0383548	0.0594161	-0.0654087
BANP	BANP-217	ENST00000479780.6	protein_coding	BANP	protein_coding	0.00920909	0.042664	0	0	0.0906426	0.085243	0.0592455	1	0.00254527	1	FALSE	-0.0654087	0.0594161	-0.0654087
BBS9	BBS9-203	ENST00000355070.6	protein_coding	BBS9	protein_coding	0	0	0.108622	0.0277949	0.150677	0.135468	0.116968	1	0.012913	1	FALSE	-0.100267		-0.100267
BBX	BBX-215	ENST00000449335.5	protein_coding	BBX	protein_coding	0.108389	0.105966	0.0526375	0.0788365	0.0270741	0	0.037264	1	0.00638516	1	FALSE	0.0650111	0.0650111
BCAR1	BCAR1-214	ENST00000563700.1	processed_transcript	BCAR1	protein_coding	0.0650052	0.0870652	0.0852597	0.0815565	0.0183459	0.0226978	0	1	0.000427779	1	FALSE	0.0660404	0.0660404
BCAR1	BCAR1-215	ENST00000564028.1	protein_coding	BCAR1	protein_coding	0.0980546	0.0649391	0.0830412	0.0626973	0.0235327	0.0158653	0.0141152	1	0.000427779	1	FALSE	0.0593453	0.0660404
BCAT2	BCAT2-201	ENST00000316273.11	protein_coding	BCAT2	protein_coding	0.64324	0.732473	0.587518	0.609768	0.51897	0.487091	0.554967	1	0.0174245	1	FALSE	0.122907	0.122907	-0.0669466
BCAT2	BCAT2-202	ENST00000402551.5	protein_coding	BCAT2	protein_coding	0.0131047	0	0	0	0.0664153	0.128765	0.0154878	1	0.0174245	1	FALSE	-0.0669466	0.122907	-0.0669466
BCCIP	BCCIP-201	ENST00000278100.11	protein_coding	BCCIP	protein_coding	0.594114	0.65305	0.437193	0.384775	0.317043	0.275838	0.382491	1	0.0116347	0.0360744	TRUE	0.192159	0.192159	-0.246285
BCCIP	BCCIP-202	ENST00000299130.7	protein_coding	BCCIP	protein_coding	0.195023	0.175512	0.185971	0.169497	0.122203	0.11425	0.145671	1	0.0116347	1	FALSE	0.0541257	0.192159	-0.246285
BCCIP	BCCIP-203	ENST00000368759.5	protein_coding	BCCIP	protein_coding	0.210863	0.171438	0.376836	0.445728	0.560753	0.609912	0.471838	1	0.0116347	0.00114839	TRUE	-0.246285	0.192159	-0.246285
BCL2L1	BCL2L1-201	ENST00000307677.5	protein_coding	BCL2L1	protein_coding	0.475503	0.521413	0.304804	0.534851	0	0.139695	0.152495	1	1.31818e-07	5.22917e-11	TRUE	0.361746	0.361746	-0.0635004
BCL2L1	BCL2L1-215	ENST00000678671.1	nonsense_mediated_decay	BCL2L1	protein_coding	0.0227173	0.00513528	0.0241163	0.032242	0.0694663	0.0852429	0.0989502	1	1.31818e-07	1	FALSE	-0.0635004	0.361746	-0.0635004
BCL2L13	BCL2L13-211	ENST00000493680.5	protein_coding	BCL2L13	protein_coding	0.24111	0.190354	0.195512	0.17069	0.302806	0.33992	0.291942	1	0.00621805	1	FALSE	-0.112139		-0.112139
BCOR	BCOR-203	ENST00000378455.8	protein_coding	BCOR	protein_coding	0.104408	0.143694	0.0868579	0.166578	0	0	0.0451674	1	0.000243217	1	FALSE	0.110329	0.110329
BCS1L	BCS1L-201	ENST00000359273.8	protein_coding	BCS1L	protein_coding	0.247023	0.273009	0.179286	0.204944	0	0.13132	0.136088	1	0.0334064	1	FALSE	0.136929	0.136929
BDKRB2	BDKRB2-202	ENST00000542454.2	protein_coding	BDKRB2	protein_coding	0.116402	0.204149	0	0.27597	1	1	0.28475	1	0.0171198	0	TRUE	-0.612453	0.612453	-0.612453
BDKRB2	BDKRB2-203	ENST00000554311.2	protein_coding	BDKRB2	protein_coding	0.883598	0.795851	1	0.72403	0	0	0.71525	1	0.0171198	0	TRUE	0.612453	0.612453	-0.612453
BEND3	BEND3-201	ENST00000369042.6	protein_coding	BEND3	protein_coding	1	0.864031	0.819725	0.566131	0.393194	0.732057	0.344683	0	0.0320903	0	TRUE	0.322494	0.322494	-0.322494
BEND3	BEND3-202	ENST00000429433.3	protein_coding	BEND3	protein_coding	0	0.135969	0.180275	0.433869	0.606806	0.267943	0.655317	0	0.0320903	0	TRUE	-0.322494	0.322494	-0.322494
BHLHB9	BHLHB9-201	ENST00000361229.8	protein_coding	BHLHB9	protein_coding	0.446443	0.196358	0.348672	0.419969	0.0828787	0.144341	0.0269064	1	0.048177	0.314412	FALSE	0.268152	0.268152	-0.336615
BHLHB9	BHLHB9-203	ENST00000447531.5	protein_coding	BHLHB9	protein_coding	0.0754818	0.232873	0.202747	0.154478	0.616021	0.581653	0.311358	1	0.048177	0.241427	FALSE	-0.336615	0.268152	-0.336615
BHMT2	BHMT2-201	ENST00000255192.8	protein_coding	BHMT2	protein_coding	0.485626	0.477854	0.38265	0.506714	0.557801	0.81916	0.553442	1	0.0315649	0.202962	FALSE	-0.180257	0.149181	-0.180257
BHMT2	BHMT2-203	ENST00000518758.1	retained_intron	BHMT2	protein_coding	0.179438	0.191814	0.272751	0.142059	0.0860907	0	0.0559137	1	0.0315649	1	FALSE	0.149181	0.149181	-0.180257
BICD2	BICD2-201	ENST00000356884.11	protein_coding	BICD2	protein_coding	0.234633	0.250584	0.29376	0.344265	0.637681	0.717237	0.452283	1	0.000140627	0	TRUE	-0.32159	0.32159	-0.32159
BICD2	BICD2-202	ENST00000375512.3	protein_coding	BICD2	protein_coding	0.765367	0.749416	0.70624	0.655735	0.362319	0.282763	0.547717	1	0.000140627	0	TRUE	0.32159	0.32159	-0.32159
BICRAL	BICRAL-203	ENST00000614467.4	protein_coding	BICRAL	protein_coding	0.143479	0.128733	0.245527	0.394195	0.0310925	0	0.274789	0	0.0225544	0.0116612	TRUE	0.126023	0.126023
BIN3	BIN3-210	ENST00000522268.1	protein_coding	BIN3	protein_coding	0.112847	0.250702	0.319587	0.233166	0.112726	0	0.16614	0	0.0490763	0.00828214	TRUE	0.13612	0.13612
BIRC5	BIRC5-202	ENST00000350051.8	protein_coding	BIRC5	protein_coding	0	0.0505992	0.150234	0.0993131	0.291238	0.402007	0.22008	1	0.0202789	0.0144164	TRUE	-0.229405	0.277776	-0.229405
BIRC5	BIRC5-210	ENST00000592115.5	retained_intron	BIRC5	protein_coding	1	0.949401	0.770662	0.879502	0.666365	0.559322	0.64066	1	0.0202789	0.00273832	TRUE	0.277776	0.277776	-0.229405
BLNK	BLNK-201	ENST00000224337.10	protein_coding	BLNK	protein_coding	0.521807	0.439854	0.541944	0.681869	0.94925	1	0.604682	0	0.0322282	0.0169335	TRUE	-0.304942	0.176745	-0.304942
BLNK	BLNK-206	ENST00000468252.1	retained_intron	BLNK	protein_coding	0.210832	0.272469	0.199689	0.172158	0	0	0.111124	1	0.0322282	0.100254	FALSE	0.176745	0.176745	-0.304942
BMPR1A	BMPR1A-203	ENST00000635816.1	nonsense_mediated_decay	BMPR1A	protein_coding	0.0659862	0.107009	0.0582116	0.0859325	0	0	0.0536132	1	0.000436883	1	FALSE	0.0614137	0.0614137
BMPR2	BMPR2-202	ENST00000374580.10	protein_coding	BMPR2	protein_coding	0.407874	0.481747	0.372082	0.509154	0.264106	0.288776	0.359796	1	0.048268	1	FALSE	0.138488	0.138488	-0.097099
BMPR2	BMPR2-203	ENST00000479069.1	processed_transcript	BMPR2	protein_coding	0.528959	0.425952	0.526358	0.430517	0.646568	0.541614	0.536955	1	0.048268	1	FALSE	-0.097099	0.138488	-0.097099
BOLA3	BOLA3-201	ENST00000295326.4	protein_coding	BOLA3	protein_coding	0.329758	0.113496	0.314749	0.0565066	0.0548801	0	0	1	0.0201133	0.00262965	TRUE	0.185334	0.185334
BOLL	BOLL-202	ENST00000321801.11	protein_coding	BOLL	protein_coding	0	0	0	0	0.210522	0.0906763	0.202013	1	1.70054e-05	1	FALSE	-0.167737	0.4855	-0.167737
BOLL	BOLL-205	ENST00000433157.1	protein_coding	BOLL	protein_coding	0.45552	1	0.772789	0.978106	0.330231	0.201108	0.416971	1	1.70054e-05	0.00178589	TRUE	0.4855	0.4855	-0.167737
BOLL	BOLL-207	ENST00000468827.2	processed_transcript	BOLL	protein_coding	0.54448	0	0	0	0.204601	0.308345	0.302377	0	1.70054e-05	0.0456165	TRUE	-0.135654	0.4855	-0.167737
BORCS8-MEF2B	BORCS8-MEF2B-201	ENST00000354191.8	nonsense_mediated_decay	BORCS8-MEF2B	protein_coding	0	0	0	0	0.437505		0.394867	1	0.00253621	1	FALSE
BPTF	BPTF-201	ENST00000306378.11	protein_coding	BPTF	protein_coding	0.0523584	0.0354619	0.0397267	0.0424226	0.0935632	0.0721415	0.0559867	1	0.0315649	1	FALSE	-0.0314047	0.0253786	-0.0401652
BPTF	BPTF-207	ENST00000544491.2	protein_coding	BPTF	protein_coding	0.00916024	0.00765279	0.0331583	0.0336021	0.0617855	0.0471654	0.0742248	1	0.0315649	1	FALSE	-0.0401652	0.0253786	-0.0401652
BPTF	BPTF-211	ENST00000578307.1	retained_intron	BPTF	protein_coding	0.088557	0.0485774	0.0855681	0.048878	0.0470668	0.0364705	0.0440122	1	0.0315649	1	FALSE	0.0253786	0.0253786	-0.0401652
BPTF	BPTF-212	ENST00000579173.1	retained_intron	BPTF	protein_coding	0.0469147	0.0912138	0.0937952	0.0929294	0.116668	0.0940298	0.0952574	1	0.0315649	1	FALSE	-0.0207719	0.0253786	-0.0401652
BRAP	BRAP-201	ENST00000327551.6	protein_coding	BRAP	protein_coding	0.16319	0	0.160698	0.186338	0.246953	0.380432	0.302824	1	0.0300945	0.0050934	TRUE	-0.182514	0.182166	-0.182514
BRAP	BRAP-202	ENST00000419234.9	protein_coding	BRAP	protein_coding	0.718099	0.881805	0.781082	0.690962	0.62559	0.540464	0.59141	1	0.0300945	0.215332	FALSE	0.182166	0.182166	-0.182514
BRDT	BRDT-201	ENST00000355011.7	protein_coding	BRDT	protein_coding	0.958165	0.962242	0.412888	0.467966	0.226681	0.262934	0.186024	1	0.00186201	0.000774843	TRUE	0.475102	0.475102	-0.343536
BRDT	BRDT-206	ENST00000402388.1	protein_coding	BRDT	protein_coding	0	0	0.294533	0	0.41914	0.462065	0.370301	1	0.00186201	0.000579787	TRUE	-0.343536	0.475102	-0.343536
BRI3	BRI3-201	ENST00000297290.4	protein_coding	BRI3	protein_coding	0.699896	0.646575	0.719292	0.732095	0.527174	0.48088	0.588125	1	8.22248e-05	1	FALSE	0.167405	0.167405	-0.130377
BRI3	BRI3-202	ENST00000456357.6	processed_transcript	BRI3	protein_coding	0.0272408	0.0922871	0.0379579	0.024682	0.159725	0.236838	0.131193	1	8.22248e-05	1	FALSE	-0.130377	0.167405	-0.130377
BRI3	BRI3-204	ENST00000474291.1	retained_intron	BRI3	protein_coding	0.042401	0.0231842	0.0528992	0.0555347	0.0632219	0.0660786	0.0571279	1	8.22248e-05	1	FALSE	-0.018638	0.167405	-0.130377
BRSK1	BRSK1-207	ENST00000591774.5	protein_coding	BRSK1	protein_coding	0	0	0	0	0.135751	0.180091	0.04352	1	0.0206143	1	FALSE	-0.119787		-0.119787
BSCL2	BSCL2-205	ENST00000403550.5	protein_coding	BSCL2	protein_coding	0.0208883	0.0588753	0.0222615	0	0.0733795	0.085968	0.0844917	1	0.0144044	1	FALSE	-0.0557734	0.0341441	-0.1188
BSCL2	BSCL2-207	ENST00000407022.7	protein_coding	BSCL2	protein_coding	0.299775	0.304087	0.350735	0.311852	0.404647	0.460831	0.44076	1	0.0144044	1	FALSE	-0.1188	0.0341441	-0.1188
BSCL2	BSCL2-213	ENST00000463679.5	retained_intron	BSCL2	protein_coding	0.077431	0.0788992	0.080245	0.0626667	0.0503082	0.0241396	0.0475513	1	0.0144044	1	FALSE	0.0341441	0.0341441	-0.1188
BTBD9	BTBD9-203	ENST00000403056.2	protein_coding	BTBD9	protein_coding	0.214711	0.131254	0.364704	0.247089	0	0	0.277228	0	0.00026835	2.97039e-06	TRUE	0.14703	0.14703
BTD	BTD-202	ENST00000383778.5	protein_coding	BTD	protein_coding	0	0	0	0.00713873	0.0907632	0.120357	0.0529722	1	1.16017e-13	1	FALSE	-0.0862462	0.179281	-0.0862462
BTD	BTD-203	ENST00000417015.3	protein_coding	BTD	protein_coding	0.0579587	0.160157	0.0741715	0.0740667	0.0240241	0	0.0457692	1	1.16017e-13	1	FALSE	0.068324	0.179281	-0.0862462
BTD	BTD-216	ENST00000672065.1	protein_coding	BTD	protein_coding	0.189068	0.231743	0.21834	0.211995	0	0	0.100516	1	1.16017e-13	2.72924e-11	TRUE	0.179281	0.179281	-0.0862462
BTD	BTD-225	ENST00000673620.1	protein_coding	BTD	protein_coding	0.210935	0.195714	0.207853	0.212459	0.312155	0.289707	0.271874	1	1.16017e-13	1	FALSE	-0.0845052	0.179281	-0.0862462
BTRC	BTRC-203	ENST00000393441.8	protein_coding	BTRC	protein_coding	0.0146162	0.0177523	0.0383738	0.00584213	0.135107	0.0936555	0.0558165	1	0.000274733	1	FALSE	-0.0757134	0.109654	-0.212184
BTRC	BTRC-204	ENST00000408038.6	protein_coding	BTRC	protein_coding	0.113723	0.237234	0.19792	0.1329	0.0321371	0.0598655	0.0903668	1	0.000274733	1	FALSE	0.109654	0.109654	-0.212184
BTRC	BTRC-205	ENST00000465182.1	processed_transcript	BTRC	protein_coding	0	0	0	0.0973081	0.326567	0.318481	0.0644843	0	0.000274733	1.66524e-05	TRUE	-0.212184	0.109654	-0.212184
BUB3	BUB3-205	ENST00000481952.1	processed_transcript	BUB3	protein_coding	0.323488	0.207474	0.245727	0.266994	0.151959	0.13147	0.171295	1	0.0385929	1	FALSE	0.109346	0.109346
BUD23	BUD23-206	ENST00000430270.5	nonsense_mediated_decay	BUD23	protein_coding	0.0595244	0.0430632	0.0449132	0.0613576	0.0156857	0.0212828	0.0226093	1	0.000858188	1	FALSE	0.0323553	0.0598036	-0.0523923
BUD23	BUD23-213	ENST00000463307.5	retained_intron	BUD23	protein_coding	0.0524515	0.0583941	0.0355738	0.0576007	0.129356	0.0951684	0.0856673	1	0.000858188	1	FALSE	-0.0523923	0.0598036	-0.0523923
BUD23	BUD23-215	ENST00000471215.1	retained_intron	BUD23	protein_coding	0.130074	0.118757	0.091251	0.0971466	0.0472725	0.0436704	0.0575679	1	0.000858188	1	FALSE	0.0598036	0.0598036	-0.0523923
C11orf45	C11orf45-201	ENST00000310799.9	protein_coding	C11orf45	protein_coding	1	0.465402	1	1	0.39451	0.450045	0.364831	1	0.0396797	0	TRUE	0.463222	0.463222	-0.463222
C11orf45	C11orf45-202	ENST00000524878.1	protein_coding	C11orf45	protein_coding	0	0.534598	0	0	0.60549	0.549955	0.635169	1	0.0396797	0	TRUE	-0.463222	0.463222	-0.463222
C11orf54	C11orf54-202	ENST00000354421.8	protein_coding	C11orf54	protein_coding	0.0529679	0.108495	0.075562	0.068979	0	0.05146	0.0349769	1	1.50965e-06	1	FALSE	0.0476887	0.0621088	-0.1393
C11orf54	C11orf54-210	ENST00000531516.1	processed_transcript	C11orf54	protein_coding	0	0	0	0	0.0913901	0.128595	0.197916	1	1.50965e-06	1	FALSE	-0.1393	0.0621088	-0.1393
C11orf54	C11orf54-215	ENST00000617482.4	protein_coding	C11orf54	protein_coding	0.0887462	0.0367505	0.0783454	0.0812269	0.0165397	0.0109355	0	1	1.50965e-06	1	FALSE	0.0621088	0.0621088	-0.1393
C11orf58	C11orf58-201	ENST00000228136.9	protein_coding	C11orf58	protein_coding	0.32844	0.330059	0.376019	0.330911	0.272811	0.240651	0.320493	1	0.000313882	1	FALSE	0.0633726	0.0633726	-0.206055
C11orf58	C11orf58-207	ENST00000525684.1	protein_coding	C11orf58	protein_coding	0.167449	0.240073	0.189665	0.216754	0.427026	0.535933	0.265662	1	0.000313882	1.75573e-06	TRUE	-0.206055	0.0633726	-0.206055
C11orf80	C11orf80-204	ENST00000525908.6	protein_coding	C11orf80	protein_coding	0.0662775	0	0.112745	0	0.255262	0.184806	0.134594	1	2.26354e-06	1	FALSE	-0.146798	0.37107	-0.163221
C11orf80	C11orf80-208	ENST00000527352.1	retained_intron	C11orf80	protein_coding	0.0731153	0.119124	0.258043	0.186449	0.278374	0.358011	0.330826	1	2.26354e-06	0.572917	FALSE	-0.163221	0.37107	-0.163221
C11orf80	C11orf80-209	ENST00000527368.5	processed_transcript	C11orf80	protein_coding	0.0789221	0.0603495	0.0932874	0.0757763	0.150276	0.138392	0.105498	1	2.26354e-06	1	FALSE	-0.0543047	0.37107	-0.163221
C11orf80	C11orf80-217	ENST00000534325.5	protein_coding	C11orf80	protein_coding	0.606779	0.430698	0.268874	0.443905	0.0635352	0.0435916	0.0923548	1	2.26354e-06	2.40389e-07	TRUE	0.37107	0.37107	-0.163221
C12orf40	C12orf40-201	ENST00000324616.9	protein_coding	C12orf40	protein_coding	0	0	0.155339	0.371701	0.457573	0.40481	0.445768	1	0.0430787	0.059908	FALSE	-0.30429		-0.30429
C16orf71	C16orf71-203	ENST00000586724.5	protein_coding	C16orf71	protein_coding	0.619331	0.589277	0.224598	0.390327	0.412745	0.200678	0	0	0.0416632	0.011848	TRUE	0.251409	0.251409
C19orf12	C19orf12-204	ENST00000392276.1	protein_coding	C19orf12	protein_coding	0.355947	0.379813	0.338118	0.348332	0.128805	0.328699	0.285348	1	0.00146725	1	FALSE	0.107935	0.107935	-0.152953
C19orf12	C19orf12-209	ENST00000623113.1	protein_coding	C19orf12	protein_coding	0.119073	0	0	0.0362131	0.146444	0.338449	0.0904307	0	0.00146725	0.00342643	TRUE	-0.152953	0.107935	-0.152953
C19orf25	C19orf25-205	ENST00000588427.5	protein_coding	C19orf25	protein_coding	0.649914	0.691107	0.596621	0.611355	0.537294	0.471092	0.578544	1	0.0047705	1	FALSE	0.108273	0.108273	-0.0290452
C19orf25	C19orf25-208	ENST00000589421.1	retained_intron	C19orf25	protein_coding	0.0790184	0.0660993	0.0426538	0.0342094	0.0852717	0.080233	0.0881166	1	0.0047705	1	FALSE	-0.0290452	0.108273	-0.0290452
C1QTNF6	C1QTNF6-201	ENST00000337843.7	protein_coding	C1QTNF6	protein_coding	0.535748	0.657148	0.478332	0.529968	0.280078	0.292522	0.354207	1	0.00104999	0.000917371	TRUE	0.241363	0.241363	-0.131812
C1QTNF6	C1QTNF6-205	ENST00000470655.5	processed_transcript	C1QTNF6	protein_coding	0.228887	0.159627	0.308195	0.230101	0.359621	0.369597	0.320463	1	0.00104999	1	FALSE	-0.118191	0.241363	-0.131812
C1QTNF6	C1QTNF6-206	ENST00000493023.1	retained_intron	C1QTNF6	protein_coding	0.0589718	0.0179659	0.108347	0.0693781	0.217439	0.181969	0.187026	1	0.00104999	1	FALSE	-0.131812	0.241363	-0.131812
C1S	C1S-201	ENST00000328916.7	protein_coding	C1S	protein_coding	0.224838	0.175034	0.217393	0.254331	0.128249	0.105816	0.133966	1	0.0190544	1	FALSE	0.095222	0.095222	-0.037587
C1S	C1S-215	ENST00000495053.1	retained_intron	C1S	protein_coding	0.0677618	0.083113	0.05765	0.10236	0.137434	0.103653	0.104838	1	0.0190544	1	FALSE	-0.037587	0.095222	-0.037587
C1orf159	C1orf159-203	ENST00000379325.7	nonsense_mediated_decay	C1orf159	protein_coding	0.0231759	0.0262198	0	0	0.0778171	0.0719646	0.0543519	1	8.83675e-07	1	FALSE	-0.0556956	0.0795743	-0.0556956
C1orf159	C1orf159-205	ENST00000421241.7	protein_coding	C1orf159	protein_coding	0.0833196	0.0642107	0.0835534	0.0872135	0	0	0	1	8.83675e-07	1	FALSE	0.0795743	0.0795743	-0.0556956
C1orf167	C1orf167-202	ENST00000433342.5	protein_coding	C1orf167	protein_coding	0	0	0.0846658	0.0135823	0.186733	0.247018	0.0908897	1	0.0469055	1	FALSE	-0.150318		-0.150318
C1orf21	C1orf21-201	ENST00000235307.7	protein_coding	C1orf21	protein_coding	0.228936	0.197044	0.224045	0.16926	0.279088	0.263834	0.307126	1	0.000103426	1	FALSE	-0.0785285	0.238947	-0.138826
C1orf21	C1orf21-202	ENST00000367514.7	processed_transcript	C1orf21	protein_coding	0.300466	0.363489	0.264725	0.426193	0	0.299314	0	0	0.000103426	4.81039e-07	TRUE	0.238947	0.238947	-0.138826
C1orf21	C1orf21-205	ENST00000648109.1	nonsense_mediated_decay	C1orf21	protein_coding	0.156985	0.142724	0.106935	0.139374	0.377233	0.291447	0.157311	1	0.000103426	1	FALSE	-0.138826	0.238947	-0.138826
C2CD6	C2CD6-202	ENST00000439140.6	protein_coding	C2CD6	protein_coding	0.111464	0.0820622	0.16414	0.181591	0.254047	0.263348	0.184559	1	1.50965e-06	1	FALSE	-0.0991704	0.241979	-0.266729
C2CD6	C2CD6-203	ENST00000439802.5	protein_coding	C2CD6	protein_coding	0.274522	0.0952916	0.39146	0.206642	0	0	0	1	1.50965e-06	1	FALSE	0.241979	0.241979	-0.266729
C2CD6	C2CD6-204	ENST00000450242.1	protein_coding	C2CD6	protein_coding	0.380623	0.246409	0.4444	0.267548	0.745953	0.474503	0.583966	1	1.50965e-06	0.262363	FALSE	-0.266729	0.241979	-0.266729
C4B	C4B-202	ENST00000435363.7	protein_coding	C4B	protein_coding	0.885054	0.80382	0.875225	0.885014	0.269155	0.268255	0.680111	1	0.0105184	0.00738536	TRUE	0.456438	0.456438
C5orf22	C5orf22-205	ENST00000510530.1	retained_intron	C5orf22	protein_coding	0.0572615	0.1619	0.160353	0.0794698	0.372869	0.368669	0.189482	1	0.00561173	0.832846	FALSE	-0.195594		-0.195594
C5orf64	C5orf64-220	ENST00000666908.1	lncRNA	C5orf64	lncRNA	0.026865	0.0286493	0	0.0160333	0.0654147	0.100491	0.0403091	1	0.0358655	1	FALSE	-0.0508512		-0.0508512
C6orf141	C6orf141-202	ENST00000414696.5	nonsense_mediated_decay	C6orf141	protein_coding	0.335532	0.319346	0.359516	0.336341	0.424287	0.377206	0.386804	1	0.031671	1	FALSE	-0.0584155	0.0946342	-0.0584155
C6orf141	C6orf141-205	ENST00000526429.1	retained_intron	C6orf141	protein_coding	0.17906	0.261045	0.16333	0.221683	0.162578	0.0661779	0.10618	1	0.031671	1	FALSE	0.0946342	0.0946342	-0.0584155
C6orf141	C6orf141-206	ENST00000529246.3	protein_coding	C6orf141	protein_coding	0.0820848	0.104249	0.140848	0.112475	0.0762517	0.0112982	0.0704182	1	0.031671	1	FALSE	0.0572582	0.0946342	-0.0584155
C6orf89	C6orf89-202	ENST00000359359.6	protein_coding	C6orf89	protein_coding	0.0181116	0.0333145	0.025894	0.0741136	0.161041	0.200492	0.0831119	1	0.00756898	1	FALSE	-0.110357		-0.110357
C7orf25	C7orf25-203	ENST00000432637.1	protein_coding	C7orf25	protein_coding	0.0697355	0.15698	0.0822368	0.153701	0.256298	0.256668	0.197514	1	0.00238818	1	FALSE	-0.121163	0.224823	-0.134969
C7orf25	C7orf25-204	ENST00000438029.1	protein_coding	C7orf25	protein_coding	0.149868	0.0915369	0.119418	0.100393	0.209753	0.314277	0.22679	1	0.00238818	1	FALSE	-0.134969	0.224823	-0.134969
C7orf25	C7orf25-205	ENST00000447342.5	protein_coding	C7orf25	protein_coding	0.452245	0.516713	0.586934	0.529442	0.415602	0.19393	0.279998	1	0.00238818	0.00320066	TRUE	0.224823	0.224823	-0.134969
C8orf44-SGK3	C8orf44-SGK3-201	ENST00000519289.1	protein_coding	C8orf44-SGK3	protein_coding	0	0.288709	0	0	0.504378	0.212173	1	0	0.00647861	0	TRUE	-0.500006	0.500006	-0.500006
C8orf44-SGK3	C8orf44-SGK3-202	ENST00000520044.5	protein_coding	C8orf44-SGK3	protein_coding	1	0.711291	1	1	0.495622	0.787827	0	0	0.00647861	0	TRUE	0.500006	0.500006	-0.500006
C9orf72	C9orf72-203	ENST00000380003.8	protein_coding	C9orf72	protein_coding	0	0.120446	0.0946226	0.223839	0.294733	0.310854	0.180129	0	0.0307639	0.0016847	TRUE	-0.152178		-0.152178
CABIN1	CABIN1-207	ENST00000459824.1	retained_intron	CABIN1	protein_coding	0.123841	0.138979	0.119484	0.0961604	0.0854446	0.0670587	0.091203	1	0.015178	1	FALSE	0.0383807	0.0383807
CABIN1	CABIN1-213	ENST00000496016.1	retained_intron	CABIN1	protein_coding	0.0752256	0.066127	0.0942726	0.0675715	0.0387852	0.0451598	0.0647479	1	0.015178	1	FALSE	0.0262349	0.0383807
CACNA1B	CACNA1B-204	ENST00000371357.5	protein_coding	CACNA1B	protein_coding	0	0.122053	0.0785312	0.183856	0.329472	0.313322	0.209603	1	0.0349071	1	FALSE	-0.188022		-0.188022
CACNA1E	CACNA1E-211	ENST00000644521.1	protein_coding	CACNA1E	protein_coding	0.464021	0.489491	0.227313	0.425503	0	0	0.600843	0	0.0186541	0.00168339	TRUE	0.201301	0.201301
CACNB4	CACNB4-211	ENST00000635731.1	retained_intron	CACNB4	protein_coding	0.0870195	0.0757043	0.0671396	0.0826172	0.134896	0.134121	0.120115	1	0.00789785	1	FALSE	-0.0515905		-0.0515905
CACNB4	CACNB4-236	ENST00000636831.1	retained_intron	CACNB4	protein_coding	0.0307818	0	0.0633832	0.0589149	0.0891257	0.102455	0.0658432	1	0.00789785	1	FALSE	-0.0475381		-0.0515905
CACYBP	CACYBP-202	ENST00000405362.1	protein_coding	CACYBP	protein_coding	0.0141327	0.0313679	0.0530107	0.11449	0.118067	0.22736	0.162845	1	0.0182594	1	FALSE	-0.116173	0.180335	-0.116173
CACYBP	CACYBP-207	ENST00000473925.1	retained_intron	CACYBP	protein_coding	0.62632	0.631724	0.636744	0.518035	0.500641	0.298586	0.469384	1	0.0182594	0.321835	FALSE	0.180335	0.180335	-0.116173
CALCOCO2	CALCOCO2-202	ENST00000372317.7	processed_transcript	CALCOCO2	protein_coding	0	0.0903677	0	0.192092	0.24474	0.199038	0.205753	1	3.31227e-08	2.21374e-09	TRUE	-0.145895	0.153053	-0.145895
CALCOCO2	CALCOCO2-218	ENST00000510997.1	processed_transcript	CALCOCO2	protein_coding	0.0682107	0.0751144	0.0900579	0.0616533	0.0462936	0.0232906	0.0532276	1	3.31227e-08	1	FALSE	0.0328218	0.153053	-0.145895
CALCOCO2	CALCOCO2-225	ENST00000570513.5	protein_coding	CALCOCO2	protein_coding	0.26618	0.208463	0.253617	0.168669	0.048573	0.0771486	0.0878156	1	3.31227e-08	1	FALSE	0.153053	0.153053	-0.145895
CALD1	CALD1-218	ENST00000478075.1	processed_transcript	CALD1	protein_coding	0.0684383	0.071493	0.067932	0.118873	0	0.0328671	0.0498344	1	0.0376039	1	FALSE	0.0541169	0.0541169
CALM1	CALM1-201	ENST00000356978.9	protein_coding	CALM1	protein_coding	0.415369	0.366117	0.396823	0.403701	0.232295	0.199782	0.263391	1	0.0318395	1	FALSE	0.163679	0.163679	-0.0686112
CALM1	CALM1-206	ENST00000553630.1	nonsense_mediated_decay	CALM1	protein_coding	0.0438392	0.0624479	0.0323509	0.0648833	0.0660724	0.157191	0.135211	1	0.0318395	1	FALSE	-0.0686112	0.163679	-0.0686112
CALM3	CALM3-201	ENST00000291295.14	protein_coding	CALM3	protein_coding	0.877079	0.804343	0.769855	0.888744	0.572019	0.541756	0.753414	1	0.00264949	0.000292861	TRUE	0.212609	0.212609	-0.103956
CALM3	CALM3-203	ENST00000477244.5	processed_transcript	CALM3	protein_coding	0.0270236	0.0698633	0.0590614	0.0419545	0.189405	0.167053	0.103835	1	0.00264949	1	FALSE	-0.103956	0.212609	-0.103956
CAMK2D	CAMK2D-204	ENST00000394522.7	protein_coding	CAMK2D	protein_coding	0.200795	0.141407	0.122077	0.123933	0.100123	0.108533	0.112238	1	0.0228263	1	FALSE	0.0400883	0.0400883
CAMK2G	CAMK2G-204	ENST00000351293.7	protein_coding	CAMK2G	protein_coding	0.0918042	0.107504	0.119778	0.107479	0	0.0877563	0.0909458	1	0.0288429	1	FALSE	0.047074	0.047074
CAMLG	CAMLG-202	ENST00000514518.1	protein_coding	CAMLG	protein_coding	0.0716466	0.0425683	0.0925033	0.0309601	0.00769195	0.010725	0.0227211	1	0.0268074	1	FALSE	0.0457069	0.0457069	-0.0452839
CAMLG	CAMLG-208	ENST00000678434.1	retained_intron	CAMLG	protein_coding	0.153455	0.134854	0.138964	0.141836	0.180817	0.191041	0.190826	1	0.0268074	1	FALSE	-0.0452839	0.0457069	-0.0452839
CANX	CANX-201	ENST00000247461.9	protein_coding	CANX	protein_coding	0.131756	0.147026	0.14116	0.138385	0.0908841	0.126639	0.119231	1	3.76513e-05	1	FALSE	0.0273302	0.0273302	-0.0600287
CANX	CANX-209	ENST00000504734.5	protein_coding	CANX	protein_coding	0.00645478	0.00449644	0.01179	0.00473913	0.0896687	0.0969489	0.0140787	1	3.76513e-05	1	FALSE	-0.0600287	0.0273302	-0.0600287
CAPRIN2	CAPRIN2-205	ENST00000454014.6	nonsense_mediated_decay	CAPRIN2	protein_coding	0.158792	0.0863991	0.0577454	0.0227253	0	0	0	1	0.00280097	1	FALSE	0.0814155	0.0814155	-0.0390577
CAPRIN2	CAPRIN2-212	ENST00000541765.5	protein_coding	CAPRIN2	protein_coding	0.0501878	0	0.0413539	0.0495219	0.0625815	0.0604618	0.0999274	1	0.00280097	1	FALSE	-0.0390577	0.0814155	-0.0390577
CAPRIN2	CAPRIN2-214	ENST00000543380.5	protein_coding	CAPRIN2	protein_coding	0.0728592	0.090793	0.085256	0.112405	0.012955	0.0313827	0.0577064	1	0.00280097	1	FALSE	0.0563136	0.0814155	-0.0390577
CAPZA1	CAPZA1-201	ENST00000263168.4	protein_coding	CAPZA1	protein_coding	0.626347	0.703048	0.691069	0.733477	0.765994	0.789257	0.744417	1	0.0454575	1	FALSE	-0.0780709	0.0685592	-0.0780709
CAPZA1	CAPZA1-203	ENST00000476820.1	processed_transcript	CAPZA1	protein_coding	0.145597	0.048021	0.0819865	0.0928724	0.0328805	0.00867044	0.0291291	1	0.0454575	1	FALSE	0.0685592	0.0685592	-0.0780709
CARD8	CARD8-207	ENST00000518596.5	retained_intron	CARD8	protein_coding	0.0700697	0.0812689	0.0464523	0.0562452	0	0.0429972	0	1	0.0301891	1	FALSE	0.0491766	0.0491766
CARM1	CARM1-202	ENST00000344150.8	protein_coding	CARM1	protein_coding	0.405774	0.494233	0.35721	0.442819	0.208445	0.180562	0.34592	1	0.0247603	0.0817667	FALSE	0.180033	0.180033	-0.0484563
CARM1	CARM1-205	ENST00000586508.1	retained_intron	CARM1	protein_coding	0.116203	0.115515	0.104575	0.0816872	0.163781	0.159685	0.135387	1	0.0247603	1	FALSE	-0.0484563	0.180033	-0.0484563
CARNMT1	CARNMT1-203	ENST00000451153.1	protein_coding	CARNMT1	protein_coding	0.033682	0	0.0349942	0	0.170545	0.185152	0.0860695	1	0.0121521	1	FALSE	-0.130086		-0.130086
CARNS1	CARNS1-201	ENST00000307823.7	protein_coding	CARNS1	protein_coding	0	0	0	0	1	1	0.509993	1	9.24062e-05	1	FALSE	-0.836664	0.791439	-0.836664
CARNS1	CARNS1-206	ENST00000531388.1	retained_intron	CARNS1	protein_coding	1	0.400744	1	1	0	0	0.176241	1	9.24062e-05	8.84758e-05	TRUE	0.791439	0.791439	-0.836664
CASK	CASK-209	ENST00000468986.7	retained_intron	CASK	protein_coding	0.0559842	0.137169	0.117669	0.118825	0	0.0499788	0.0555587	1	1.58401e-11	1	FALSE	0.0722327	0.0961046	-0.0643329
CASK	CASK-222	ENST00000644347.1	protein_coding	CASK	protein_coding	0.152058	0.0443023	0.0854844	0.102574	0	0	0	1	1.58401e-11	1	FALSE	0.0961046	0.0961046	-0.0643329
CASK	CASK-226	ENST00000645986.2	protein_coding	CASK	protein_coding	0	0	0	0	0.0771909	0.0845946	0.0312131	1	1.58401e-11	1	FALSE	-0.0643329	0.0961046	-0.0643329
CASP8AP2	CASP8AP2-203	ENST00000547893.5	retained_intron	CASP8AP2	protein_coding	0.245976	0.212	0.20942	0.18668	0.142648	0.116715	0.154993	1	0.0209543	1	FALSE	0.0753999	0.0753999	-0.241831
CASP8AP2	CASP8AP2-205	ENST00000551025.4	protein_coding	CASP8AP2	protein_coding	0	0.119547	0.250101	0.295945	0.38435	0.574484	0.265854	0	0.0209543	0.0029606	TRUE	-0.241831	0.0753999	-0.241831
CASTOR3	CASTOR3-201	ENST00000328453.9	processed_transcript	CASTOR3	transcribed_unprocessed_pseudogene	0.202702	0.185261	0.129874	0.204527	0.247156	0.236869	0.238213	1	0.000107622	1	FALSE	-0.0601551	0.097431	-0.0601551
CASTOR3	CASTOR3-204	ENST00000435519.6	processed_transcript	CASTOR3	transcribed_unprocessed_pseudogene	0.074438	0.0829469	0.0697287	0.16261	0	0	0	1	0.000107622	1	FALSE	0.097431	0.097431	-0.0601551
CATSPER2P1	CATSPER2P1-203	ENST00000429276.1	processed_transcript	CATSPER2P1	transcribed_unprocessed_pseudogene	0.508536	0.56603	0.573229	0.582087	0.323229	0.311359	0.399066	1	0.0330972	0.0175397	TRUE	0.212919	0.212919	-0.0770612
CATSPER2P1	CATSPER2P1-204	ENST00000439564.5	transcribed_unprocessed_pseudogene	CATSPER2P1	transcribed_unprocessed_pseudogene	0.0236464	0.0523235	0.06966	0.0463836	0.151032	0.121144	0.103018	1	0.0330972	1	FALSE	-0.0770612	0.212919	-0.0770612
CATSPERG	CATSPERG-208	ENST00000470292.2	retained_intron	CATSPERG	protein_coding	0.0892857	0.0363925	0.0686682	0.0685388	0.137326	0.191441	0.101391	1	0.000440379	1	FALSE	-0.0776646	0.1217	-0.195584
CATSPERG	CATSPERG-212	ENST00000477793.2	retained_intron	CATSPERG	protein_coding	0.239599	0.16975	0.198751	0.387317	0.134696	0.113578	0.133188	1	0.000440379	1	FALSE	0.1217	0.1217	-0.195584
CATSPERG	CATSPERG-215	ENST00000492088.3	retained_intron	CATSPERG	protein_coding	0.241795	0.260935	0.246934	0.253808	0.125874	0.170069	0.155111	1	0.000440379	1	FALSE	0.100516	0.1217	-0.195584
CATSPERG	CATSPERG-216	ENST00000585424.1	retained_intron	CATSPERG	protein_coding	0.0280475	0.0536625	0.0268597	0.0319736	0.181295	0.310684	0.200182	1	0.000440379	0.000244023	TRUE	-0.195584	0.1217	-0.195584
CAV2	CAV2-201	ENST00000222693.5	protein_coding	CAV2	protein_coding	0.789493	0.70873	0.72379	0.746682	0.853877	0.92631	0.833571	1	6.65625e-05	1	FALSE	-0.129079	0.085067	-0.129079
CAV2	CAV2-202	ENST00000343213.2	protein_coding	CAV2	protein_coding	0.0414419	0.108129	0.127184	0.0746732	0.00837001	0	0	1	6.65625e-05	1	FALSE	0.085067	0.085067	-0.129079
CAV2	CAV2-214	ENST00000495841.1	processed_transcript	CAV2	protein_coding	0.085539	0.131792	0.086359	0.105931	0.0677644	0.0201341	0.0838731	1	6.65625e-05	1	FALSE	0.0451479	0.085067	-0.129079
CAVIN2-AS1	CAVIN2-AS1-202	ENST00000428980.6	lncRNA	CAVIN2-AS1	lncRNA	0.0774362	0.132619	0.238437	0.11784	0.306843	0.358647	0.2676	1	0.0072398	0.464341	FALSE	-0.169447		-0.169447
CAVIN2-AS1	CAVIN2-AS1-214	ENST00000625221.1	lncRNA	CAVIN2-AS1	lncRNA	0.127215	0	0.111274	0	0.172884	0.162707	0.188552	1	0.0072398	1	FALSE	-0.115092		-0.169447
CBWD6	CBWD6-208	ENST00000494538.6	nonsense_mediated_decay	CBWD6	protein_coding	0	0	0	0.030486	0.163537	0.308864	0.165889	1	7.18212e-05	2.31656e-06	TRUE	-0.205142	0.0819931	-0.205142
CBWD6	CBWD6-212	ENST00000613125.4	processed_transcript	CBWD6	protein_coding	0.19242	0.157956	0.170872	0.253786	0.145924	0.0828992	0.106474	1	7.18212e-05	1	FALSE	0.0819931	0.0819931	-0.205142
CBX8	CBX8-201	ENST00000269385.9	protein_coding	CBX8	protein_coding	0.676134	1	0.508983	0.672368	0.415801	0.364053	0.40275	1	0.00701091	0.0785182	FALSE	0.32017	0.32017	-0.332748
CBX8	CBX8-204	ENST00000485449.1	processed_transcript	CBX8	protein_coding	0	0	0.119134	0	0.376693	0.504392	0.20651	1	0.00701091	0.000683396	TRUE	-0.332748	0.32017	-0.332748
CC2D1B	CC2D1B-209	ENST00000491136.6	retained_intron	CC2D1B	protein_coding	0.118506	0.092003	0.131781	0.118535	0.211313	0.182605	0.138901	1	0.0016716	1	FALSE	-0.0623999		-0.0623999
CCDC103	CCDC103-205	ENST00000577339.5	protein_coding	CCDC103	protein_coding	0.744385	0.554345		0.56326	0	0	0.0906092	1	0.0125216	0.0279078	TRUE
CCDC114	CCDC114-201	ENST00000315396.7	protein_coding	CCDC114	protein_coding	0.0406173	0.0813128	0.0844112	0.0701719	0.123222	0.144059	0.0927475	1	0.00162172	1	FALSE	-0.0508813	0.249453	-0.110996
CCDC114	CCDC114-207	ENST00000674207.1	nonsense_mediated_decay	CCDC114	protein_coding	0.680553	0.737201	0.535869	0.583431	0.409329	0.331734	0.413366	1	0.00162172	0.0216543	TRUE	0.249453	0.249453	-0.110996
CCDC114	CCDC114-208	ENST00000674234.1	processed_transcript	CCDC114	protein_coding	0.0467718	0.0448384	0	0.0241848	0.119725	0.111258	0.18885	1	0.00162172	1	FALSE	-0.110996	0.249453	-0.110996
CCDC126	CCDC126-203	ENST00000410069.1	protein_coding	CCDC126	protein_coding	0	0	0	0	0.358497	0.272076	0.150005	1	0.00429899	1	FALSE	-0.260193		-0.260193
CCDC136	CCDC136-215	ENST00000528772.1	retained_intron	CCDC136	protein_coding	0.316604	0.432718	0.360977	0.373619	0.230193	0.200356	0.174829	1	0.0294576	1	FALSE	0.169187	0.169187
CCDC138	CCDC138-203	ENST00000412964.6	protein_coding	CCDC138	protein_coding	0	0	0	0	0.23459	0.053173	0.0716562	1	0.00958293	1	FALSE	-0.119806		-0.119806
CCDC141	CCDC141-203	ENST00000443758.6	protein_coding	CCDC141	protein_coding	0.368168	0.426848	0.447835	0.489639	0.314947	0.301676	0.339237	1	0.00507992	1	FALSE	0.114502	0.114502	-0.179351
CCDC141	CCDC141-206	ENST00000498142.1	processed_transcript	CCDC141	protein_coding	0.211762	0	0	0	0.369458	0.177506	0.14991	0	0.00507992	0.000127516	TRUE	-0.179351	0.114502	-0.179351
CCDC144A	CCDC144A-208	ENST00000428950.2	processed_transcript	CCDC144A	protein_coding	0.00917196	0	0.0165321	0.0113883	0.0937171	0.0633316	0.0758199	1	0.000611363	1	FALSE	-0.0683498	0.126919	-0.0683498
CCDC144A	CCDC144A-211	ENST00000463809.1	retained_intron	CCDC144A	protein_coding	0.163902	0.337557	0.178772	0.30227	0.129193	0.110493	0.116432	1	0.000611363	1	FALSE	0.126919	0.126919	-0.0683498
CCDC144B	CCDC144B-201	ENST00000285176.13	transcribed_unprocessed_pseudogene	CCDC144B	transcribed_unprocessed_pseudogene	0.0427649	0.0142229	0.164377	0.0488889	0.311156	0.355827	0.146483	0	0.0272783	0.00529745	TRUE	-0.203592		-0.203592
CCDC15	CCDC15-201	ENST00000344762.6	protein_coding	CCDC15	protein_coding	0	0	0.399049	0.359089	0.590302	0.440004	0.484619	1	0.0454081	0.00542161	TRUE	-0.315441		-0.315441
CCDC150	CCDC150-201	ENST00000389175.9	protein_coding	CCDC150	protein_coding	0	0.0170283	0.0203502	0	0.0630319	0.130537	0.0497619	1	0.00143804	1	FALSE	-0.0717655	0.299572	-0.151129
CCDC150	CCDC150-209	ENST00000463826.5	retained_intron	CCDC150	protein_coding	0.644331	0.966535	0.620609	0.578625	0.450897	0.339402	0.418562	1	0.00143804	0.00444353	TRUE	0.299572	0.299572	-0.151129
CCDC150	CCDC150-218	ENST00000497159.1	processed_transcript	CCDC150	protein_coding	0.180364	0	0.0636671	0.127339	0.204738	0.250832	0.276345	1	0.00143804	0.205427	FALSE	-0.151129	0.299572	-0.151129
CCDC158	CCDC158-201	ENST00000388914.7	protein_coding	CCDC158	protein_coding	0.0286927	0.0209367	0.0867308	0.0324682	0.2167	0.347902	0.184719	1	4.35092e-05	0.00609328	TRUE	-0.207567	0.385607	-0.207567
CCDC158	CCDC158-203	ENST00000504667.2	retained_intron	CCDC158	protein_coding	0.89894	0.979063	0.6485	0.866086	0.52889	0.341373	0.517358	1	4.35092e-05	3.89405e-06	TRUE	0.385607	0.385607	-0.207567
CCDC158	CCDC158-205	ENST00000509851.5	retained_intron	CCDC158	protein_coding	0.0583965	0	0.10695	0	0.148575	0.175219	0.135391	1	4.35092e-05	1	FALSE	-0.111725	0.385607	-0.207567
CCDC189	CCDC189-201	ENST00000433909.2	retained_intron	CCDC189	protein_coding	0	0	0.224314	0.0899975	0.270306	0.238177	0.229198	1	0.039744	1	FALSE	-0.167316		-0.167316
CCDC189	CCDC189-207	ENST00000544487.5	retained_intron	CCDC189	protein_coding	0	0	0.0449513	0	0.0737213	0.184951	0.0817565	1	0.039744	1	FALSE	-0.102238		-0.167316
CCDC191	CCDC191-201	ENST00000295878.8	protein_coding	CCDC191	protein_coding	0.221473	0.20376	0.266996	0.263676	0.303376	0.342949	0.317205	1	0.00093189	1	FALSE	-0.0822004	0.0411907	-0.0822004
CCDC191	CCDC191-202	ENST00000460813.5	nonsense_mediated_decay	CCDC191	protein_coding	0	0.0103612	0.0228408	0.0331619	0.0667663	0.0583322	0.0883238	1	0.00093189	1	FALSE	-0.0545498	0.0411907	-0.0822004
CCDC191	CCDC191-205	ENST00000481358.5	retained_intron	CCDC191	protein_coding	0.15245	0.146043	0.144715	0.141599	0.124198	0.12218	0.0686554	1	0.00093189	1	FALSE	0.0411907	0.0411907	-0.0822004
CCDC74A	CCDC74A-205	ENST00000465939.1	retained_intron	CCDC74A	protein_coding	0.215613	0.178058	0.177296	0.208879	0.138357	0.098015	0.121367	1	0.0153293	1	FALSE	0.0757155	0.0757155	-0.159159
CCDC74A	CCDC74A-207	ENST00000468650.1	retained_intron	CCDC74A	protein_coding	0.0448033	0.0404448	0.107649	0.124986	0.276181	0.253565	0.186145	1	0.0153293	1	FALSE	-0.159159	0.0757155	-0.159159
CCDC80	CCDC80-201	ENST00000206423.8	protein_coding	CCDC80	protein_coding	0.205686	0.202425	0.203572	0.223029	0.624321	0.407889	0.261097	1	0.00197384	0.547998	FALSE	-0.222424	0.0681985	-0.222424
CCDC80	CCDC80-203	ENST00000461431.1	protein_coding	CCDC80	protein_coding	0.0922367	0.0885838	0.0957587	0.107943	0	0	0.0837965	1	0.00197384	1	FALSE	0.0681985	0.0681985	-0.222424
CCDC82	CCDC82-201	ENST00000278520.9	protein_coding	CCDC82	protein_coding	0.0707179	0.206636	0.248608	0.121447	0	0	0.228982	0	0.0101757	0.0127994	TRUE	0.0855248	0.0855248
CCDC88A	CCDC88A-212	ENST00000474059.2	retained_intron	CCDC88A	protein_coding	0	0	0	0.0824816	0.252894	0.308957	0.114185	1	9.52227e-14	4.91122e-20	TRUE	-0.204725	0.063732	-0.204725
CCDC88A	CCDC88A-228	ENST00000643634.1	retained_intron	CCDC88A	protein_coding	0.307343	0.312413	0.306181	0.302003	0.252043	0.220351	0.257365	1	9.52227e-14	1	FALSE	0.063732	0.063732	-0.204725
CCDC88A	CCDC88A-248	ENST00000645342.1	retained_intron	CCDC88A	protein_coding	0.138704	0.124	0.113363	0.118279	0.0931724	0.101171	0.0983986	1	9.52227e-14	1	FALSE	0.0260061	0.063732	-0.204725
CCDC88A	CCDC88A-251	ENST00000645484.1	processed_transcript	CCDC88A	protein_coding	0.112561	0.143216	0.10072	0.106949	0.0697882	0.0727437	0.0947212	1	9.52227e-14	1	FALSE	0.0367772	0.063732	-0.204725
CCHCR1	CCHCR1-203	ENST00000396268.7	protein_coding	CCHCR1	protein_coding	0.0716695	0	0.0985042	0.11487	0.22765	0.157524	0.238261	1	0.0241388	1	FALSE	-0.136551	0.0670195	-0.136551
CCHCR1	CCHCR1-209	ENST00000455279.6	protein_coding	CCHCR1	protein_coding	0.132574	0.0638708	0.0662887	0.062429	0	0.0138491	0.0289643	1	0.0241388	1	FALSE	0.0670195	0.0670195	-0.136551
CCNB1IP1	CCNB1IP1-202	ENST00000358932.9	protein_coding	CCNB1IP1	protein_coding	0.259277	0.20418	0.194641	0.198283	0	0	0.339229	0	0.00246475	0.000134885	TRUE	0.101019	0.101019	-0.110875
CCNB1IP1	CCNB1IP1-208	ENST00000553516.5	processed_transcript	CCNB1IP1	protein_coding	0.0900996	0.116543	0.0537805	0.0953422	0.0465056	0.0506439	0.036384	1	0.00246475	1	FALSE	0.0444303	0.101019	-0.110875
CCNB1IP1	CCNB1IP1-215	ENST00000557114.5	processed_transcript	CCNB1IP1	protein_coding	0.315044	0.411274	0.389804	0.386264	0.533351	0.488143	0.437922	1	0.00246475	1	FALSE	-0.110875	0.101019	-0.110875
CCNI2	CCNI2-204	ENST00000614847.1	protein_coding	CCNI2	protein_coding	0.365474	0	0	0	1	0.413387	0.606889	1	0.0165135	0.0132689	TRUE	-0.582057		-0.582057
CCNJ	CCNJ-202	ENST00000403870.7	protein_coding	CCNJ	protein_coding	0.0419417	0	0	0	0.0998097	0.174047	0.131044	1	0.00167618	0	TRUE	-0.124481	0.124481	-0.124481
CCNJ	CCNJ-203	ENST00000465148.3	protein_coding	CCNJ	protein_coding	0.958058	1	1	1	0.90019	0.825953	0.868956	1	0.00167618	0	TRUE	0.124481	0.124481	-0.124481
CCNY	CCNY-203	ENST00000374704.8	protein_coding	CCNY	protein_coding	0.448544	0.432912	0.403437	0.509891	0.380584	0.346559	0.347192	1	0.000788896	1	FALSE	0.0905842	0.0905842	-0.153383
CCNY	CCNY-205	ENST00000465416.5	processed_transcript	CCNY	protein_coding	0	0.14838	0	0	0.253187	0.19304	0.125208	0	0.000788896	1.50815e-05	TRUE	-0.153383	0.0905842	-0.153383
CCR6	CCR6-201	ENST00000341935.9	protein_coding	CCR6	protein_coding	1	1	0.7561	1	0.545547	0.618346	0.887923	0	0.0254404	0	TRUE	0.255086	0.255086	-0.255086
CCR6	CCR6-203	ENST00000400926.5	protein_coding	CCR6	protein_coding	0	0	0.2439	0	0.454453	0.381654	0.112077	0	0.0254404	0	TRUE	-0.255086	0.255086	-0.255086
CCSAP	CCSAP-203	ENST00000366687.5	protein_coding	CCSAP	protein_coding	0.59239	0.74794	0.605896	0.78619	0.857977	0	0	0	0.00440067	0.0172242	TRUE	0.397112	0.397112
CCT2	CCT2-201	ENST00000299300.11	protein_coding	CCT2	protein_coding	0.682104	0.549159	0.739272	0.757218	0.848511	0.818175	0.854397	1	0.0153188	0.0060081	TRUE	-0.158423	0.0732368	-0.158423
CCT2	CCT2-211	ENST00000550653.1	retained_intron	CCT2	protein_coding	0.0964434	0.132301	0.104089	0.0711895	0.0337793	0.0333064	0.016221	1	0.0153188	1	FALSE	0.0732368	0.0732368	-0.158423
CCT2	CCT2-214	ENST00000553169.1	retained_intron	CCT2	protein_coding	0.150401	0.258812	0.0918437	0.105487	0.0795142	0.0685706	0.0882708	1	0.0153188	1	FALSE	0.0728506	0.0732368	-0.158423
CCZ1B	CCZ1B-207	ENST00000468078.1	retained_intron	CCZ1B	protein_coding	0.0427384	0.150188	0.089668	0	0.392704	0.412364	0.16971	1	4.24186e-05	1.17276e-08	TRUE	-0.254277	0.0585821	-0.254277
CCZ1B	CCZ1B-210	ENST00000485620.1	retained_intron	CCZ1B	protein_coding	0.110322	0.111796	0.0960567	0.169364	0.0703186	0.062047	0.0845625	1	4.24186e-05	1	FALSE	0.0495751	0.0585821	-0.254277
CCZ1B	CCZ1B-212	ENST00000490178.1	retained_intron	CCZ1B	protein_coding	0.0740925	0.1101	0.148025	0.0616567	0.031011	0.054751	0.0338972	1	4.24186e-05	1	FALSE	0.0585821	0.0585821	-0.254277
CD14	CD14-205	ENST00000519715.1	protein_coding	CD14	protein_coding	0.33873	0.266778	0.149447	0.26243	0	0	0.185598	0	0.00106605	0.000125554	TRUE	0.19248	0.19248
CD163	CD163-201	ENST00000359156.8	protein_coding	CD163	protein_coding	0.0686272	0.079705	0.14003	0.0689206	0.207943	0.236135	0.196387	1	2.02018e-12	1	FALSE	-0.124167	0.301208	-0.137426
CD163	CD163-203	ENST00000432237.3	protein_coding	CD163	protein_coding	0.164811	0.234807	0.440541	0.364673	0	0	0	1	2.02018e-12	1	FALSE	0.301208	0.301208	-0.137426
CD163	CD163-209	ENST00000541972.5	protein_coding	CD163	protein_coding	0	0.0288768	0	0	0.177598	0.142231	0.114106	1	2.02018e-12	1	FALSE	-0.137426	0.301208	-0.137426
CD163L1	CD163L1-201	ENST00000313599.8	protein_coding	CD163L1	protein_coding	0.467358	0.44388	0.387929	0.825381	0.178945	0.334398	0.335231	1	0.0454081	1	FALSE	0.248279	0.248279	-0.325097
CD163L1	CD163L1-205	ENST00000543276.1	protein_coding	CD163L1	protein_coding	0.228756	0	0.378205	0	0.612394	0.382189	0.435928	1	0.0454081	0.0357525	TRUE	-0.325097	0.248279	-0.325097
CD320	CD320-202	ENST00000537716.6	protein_coding	CD320	protein_coding	0.157533	0.077778	0.137307	0.0735152	0.0536741	0.025991	0	1	0.0165544	1	FALSE	0.0849784	0.0849784	-0.0706158
CD320	CD320-204	ENST00000596246.1	processed_transcript	CD320	protein_coding	0.0328962	0.0576424	0.0896197	0.0324853	0.123675	0.139183	0.108472	1	0.0165544	1	FALSE	-0.0706158	0.0849784	-0.0706158
CD47	CD47-203	ENST00000398258.7	protein_coding	CD47	protein_coding	0	0	0	0.0380931	0.073331	0.155174	0.051877	1	0.000552231	1	FALSE	-0.0839374		-0.0839374
CD59	CD59-202	ENST00000395850.9	protein_coding	CD59	protein_coding	0.31098	0.330898	0.409569	0.345248	0.1855	0.217996	0.244997	1	0.00642677	1	FALSE	0.133009	0.133009	-0.0881528
CD59	CD59-211	ENST00000642928.2	protein_coding	CD59	protein_coding	0.0941046	0.099368	0.114098	0.0825479	0.0599964	0.0578422	0.0700215	1	0.00642677	1	FALSE	0.0349095	0.133009	-0.0881528
CD59	CD59-213	ENST00000651485.1	protein_coding	CD59	protein_coding	0.0770274	0.078847	0.0230367	0.0468581	0.14281	0.139152	0.151824	1	0.00642677	1	FALSE	-0.0881528	0.133009	-0.0881528
CD99P1	CD99P1-202	ENST00000430562.6	processed_transcript	CD99P1	transcribed_unprocessed_pseudogene	0.178175	0.387912	0.14108	0.273906	0	0	0	1	1.5758e-08	1	FALSE	0.245268	0.245268	-0.238513
CD99P1	CD99P1-205	ENST00000527459.6	transcribed_unprocessed_pseudogene	CD99P1	transcribed_unprocessed_pseudogene	0.176844	0	0	0	0.33822	0.156089	0.353862	0	1.5758e-08	1.53578e-05	TRUE	-0.238513	0.245268	-0.238513
CDADC1	CDADC1-203	ENST00000466868.1	processed_transcript	CDADC1	protein_coding	0.407462	0.225008	0.280548	0.283099	0	0	0.117044	1	9.20756e-06	1.04952e-06	TRUE	0.260015	0.260015	-0.199719
CDADC1	CDADC1-204	ENST00000484126.5	nonsense_mediated_decay	CDADC1	protein_coding	0.085377	0	0.0379624	0.0521716	0.295367	0.238044	0.197379	1	9.20756e-06	0.00664846	TRUE	-0.199719	0.260015	-0.199719
CDAN1	CDAN1-203	ENST00000563260.1	protein_coding	CDAN1	protein_coding	0.0867063	0	0.28974	0	0.172926	0.245	0.195356	0	0.0154109	0.00518393	TRUE	-0.110316		-0.110316
CDAN1	CDAN1-206	ENST00000643434.1	nonsense_mediated_decay	CDAN1	protein_coding	0.0806631	0.139953	0.0645858	0.165543	0.232638	0.166059	0.191185	1	0.0154109	1	FALSE	-0.0839413		-0.110316
CDC34	CDC34-204	ENST00000593036.4	processed_transcript	CDC34	protein_coding	0	0	0	0.0183127	0.0591432	0.0557338	0.0487491	1	0.00146426	1	FALSE	-0.0499639		-0.0855584
CDC34	CDC34-205	ENST00000606065.3	protein_coding	CDC34	protein_coding	0	0.0327825	0.014678	0.0276314	0.116067	0.0791559	0.117771	1	0.00146426	1	FALSE	-0.0855584		-0.0855584
CDC42BPB	CDC42BPB-202	ENST00000558321.5	protein_coding	CDC42BPB	protein_coding	0.102285	0.105434	0.100757	0.0893368	0.0665912	0.0461259	0.0359904	1	0.049998	1	FALSE	0.0498839	0.0498839	-0.0543866
CDC42BPB	CDC42BPB-203	ENST00000558867.1	processed_transcript	CDC42BPB	protein_coding	0.0604194	0.0715508	0.067198	0.0469737	0.126432	0.132299	0.0890356	1	0.049998	1	FALSE	-0.0543866	0.0498839	-0.0543866
CDC42SE1	CDC42SE1-201	ENST00000357235.6	protein_coding	CDC42SE1	protein_coding	0.592996	0.509005	0.475218	0.505396	0.166369	0.230407	0.348889	1	0.00011583	0.0208978	TRUE	0.272099	0.272099	-0.151514
CDC42SE1	CDC42SE1-202	ENST00000439374.6	protein_coding	CDC42SE1	protein_coding	0.0159327	0.00393968	0.0267727	0.0119381	0.225912	0.155382	0.117185	1	0.00011583	1	FALSE	-0.151514	0.272099	-0.151514
CDCA3	CDCA3-205	ENST00000535871.1	processed_transcript	CDCA3	protein_coding	0	0	0	0	0.0414066	0.0729626	0.0802087	1	0.0466222	1	FALSE	-0.0648593	0.218159	-0.139736
CDCA3	CDCA3-206	ENST00000536241.1	retained_intron	CDCA3	protein_coding	0	0.0678156	0.0733556	0	0.126062	0.0917139	0.176063	1	0.0466222	1	FALSE	-0.0959866	0.218159	-0.139736
CDCA3	CDCA3-211	ENST00000603043.1	processed_transcript	CDCA3	protein_coding	0	0	0	0.101004	0.164591	0.156518	0.173853	1	0.0466222	1	FALSE	-0.139736	0.218159	-0.139736
CDCA3	CDCA3-212	ENST00000604599.1	processed_transcript	CDCA3	protein_coding	0.596999	0.271787	0.24605	0.264956	0.128944	0.113838	0.137584	1	0.0466222	1	FALSE	0.218159	0.218159	-0.139736
CDK10	CDK10-201	ENST00000331006.12	protein_coding	CDK10	protein_coding	0.17273	0.160728	0.129823	0.180421	0.218153	0.24973	0.219609	1	0.0346589	1	FALSE	-0.0682386		-0.0682386
CDK10	CDK10-203	ENST00000378277.8	retained_intron	CDK10	protein_coding	0.0483168	0	0.0533188	0.0501429	0.103604	0.0747137	0.0727658	1	0.0346589	1	FALSE	-0.0457499		-0.0682386
CDK16	CDK16-203	ENST00000428400.5	retained_intron	CDK16	protein_coding	0.0717186	0.0670266	0.0660797	0.0617664	0.0509569	0.0491607	0.0524988	1	1.27282e-07	1	FALSE	0.0157757	0.0157757	-0.03565
CDK16	CDK16-213	ENST00000519758.5	protein_coding	CDK16	protein_coding	0.0306227	0.0549321	0.0679317	0.024281	0.0871816	0.0823604	0.0707338	1	1.27282e-07	1	FALSE	-0.03565	0.0157757	-0.03565
CDK17	CDK17-203	ENST00000543119.6	protein_coding	CDK17	protein_coding	0.127241	0.209588	0.188996	0.171998	0.314189	0.259484	0.222228	1	0.0110457	1	FALSE	-0.0908445	0.0445998	-0.0908445
CDK17	CDK17-210	ENST00000552262.1	protein_coding	CDK17	protein_coding	0.0570038	0.128653	0.0543192	0.0950476	0.0347383	0.0384477	0.0442826	1	0.0110457	1	FALSE	0.0445998	0.0445998	-0.0908445
CDK18	CDK18-208	ENST00000476153.6	retained_intron	CDK18	protein_coding	0.209321	0.0588377	0.212654	0.122599	0.0522446	0.0201771	0.0328999	1	7.18212e-05	1	FALSE	0.115746	0.224332	-0.264672
CDK18	CDK18-210	ENST00000484080.5	processed_transcript	CDK18	protein_coding	0	0	0	0.176137	0.35902	0.339981	0.227118	1	7.18212e-05	0.000960001	TRUE	-0.264672	0.224332	-0.264672
CDK18	CDK18-219	ENST00000507240.1	processed_transcript	CDK18	protein_coding	0.218435	0.456116	0.172611	0.183079	0	0.099684	0	1	7.18212e-05	0.0175712	TRUE	0.224332	0.224332	-0.264672
CDK2AP1	CDK2AP1-209	ENST00000544658.5	protein_coding	CDK2AP1	protein_coding	0.00789407	0.00816371	0.0182269	0	0.149401	0.0671826	0.103982	1	0.0121505	1	FALSE	-0.0982842		-0.0982842
CDK2AP1	CDK2AP1-212	ENST00000652466.1	nonsense_mediated_decay	CDK2AP1	protein_coding	0.078458	0.0669601	0.0567153	0.0634859	0.109049	0.127275	0.0913021	1	0.0121505	1	FALSE	-0.042804		-0.0982842
CDK3	CDK3-202	ENST00000448471.2	protein_coding	CDK3	protein_coding	0	0	0	0	0.201406	0.264551	0.517585	1	0.00147481	1	FALSE	-0.327847	0.249742	-0.327847
CDK3	CDK3-203	ENST00000586261.2	protein_coding	CDK3	protein_coding	1	0.660591	0.511999	0.577421	0.428864	0.402004	0.482415	1	0.00147481	0.203564	FALSE	0.249742	0.249742	-0.327847
CDK8	CDK8-201	ENST00000381527.8	protein_coding	CDK8	protein_coding	0.623769	0.685869	0.809405	0.906749	0.610743	0.444012	0.566314	1	0.0355167	0.0218558	TRUE	0.216092	0.216092	-0.206053
CDK8	CDK8-205	ENST00000536792.5	nonsense_mediated_decay	CDK8	protein_coding	0.27815	0.16754	0.101582	0.0410936	0.31734	0.434839	0.307253	1	0.0355167	0.00891132	TRUE	-0.206053	0.216092	-0.206053
CDKN2B	CDKN2B-203	ENST00000579591.1	retained_intron	CDKN2B	protein_coding	0	0	0	0.186392	0.0690637	0.281481	0.392946	0	0.0416158	0.02976	TRUE	-0.201232		-0.201232
CDPF1	CDPF1-202	ENST00000381037.4	nonsense_mediated_decay	CDPF1	protein_coding	0.0915789	0.127525	0.0900313	0.116389	0	0	0	1	0.0242658	1	FALSE	0.106381	0.106381
CDRT15P3	CDRT15P3-201	ENST00000623129.1	processed_transcript	CDRT15P3	transcribed_unprocessed_pseudogene	0	0	0.099253	0.326421	0.4028	0.74044	0.863276	1	0.0167853	0	TRUE	-0.56242	0.56242	-0.56242
CDRT15P3	CDRT15P3-202	ENST00000668677.1	transcribed_unprocessed_pseudogene	CDRT15P3	transcribed_unprocessed_pseudogene	1	1	0.900747	0.673579	0.5972	0.25956	0.136724	1	0.0167853	0	TRUE	0.56242	0.56242	-0.56242
CDS2	CDS2-203	ENST00000460006.6	protein_coding	CDS2	protein_coding	0.409322	0.414609	0.397947	0.430829	0.326362	0.302478	0.332723	1	0.0215916	1	FALSE	0.0926557	0.0926557	-0.076736
CDS2	CDS2-204	ENST00000467923.5	processed_transcript	CDS2	protein_coding	0.0865232	0.0394377	0.0879315	0.105131	0.183183	0.1538	0.132493	1	0.0215916	1	FALSE	-0.076736	0.0926557	-0.076736
CEACAM1	CEACAM1-203	ENST00000352591.9	protein_coding	CEACAM1	protein_coding	0.0538658	0.0347958	0.117502	0.127118	0	0	0	1	0.024055	1	FALSE	0.0833204	0.0833204
CELSR1	CELSR1-201	ENST00000262738.9	protein_coding	CELSR1	protein_coding	0	0.0579966	0.0234879	0	0.138914	0.316882	0.196628	1	0.0021673	0.22523	FALSE	-0.197103	0.3203	-0.197103
CELSR1	CELSR1-213	ENST00000674500.2	protein_coding	CELSR1	protein_coding	0.429317	0.327034	0.35611	0.543997	0.183085	0	0.0983593	1	0.0021673	0.0230184	TRUE	0.3203	0.3203	-0.197103
CENPK	CENPK-207	ENST00000508311.1	retained_intron	CENPK	protein_coding	0.0194959	0	0.0538279	0.0550134	0.0658991	0.109699	0.0687931	1	0.0213699	1	FALSE	-0.0493793	0.259175	-0.0493793
CENPK	CENPK-210	ENST00000510354.1	protein_coding	CENPK	protein_coding	0.109875	0.180819	0.152518	0.109176	0.104243	0.10296	0.0985048	1	0.0213699	1	FALSE	0.0361943	0.259175	-0.0493793
CENPK	CENPK-214	ENST00000513951.1	retained_intron	CENPK	protein_coding	0.470445	0.707192	0.330342	0.470312	0.261484	0.230189	0.214519	1	0.0213699	0.00858903	TRUE	0.259175	0.259175	-0.0493793
CENPL	CENPL-201	ENST00000345664.10	protein_coding	CENPL	protein_coding	0.153704	0.125826	0.104755	0.126575	0	0	0.0916035	1	0.01274	1	FALSE	0.0971806	0.138986
CENPL	CENPL-208	ENST00000495275.1	processed_transcript	CENPL	protein_coding	0.605915	0.678565	0.624655	0.585553	0.503249	0.414133	0.536676	1	0.01274	1	FALSE	0.138986	0.138986
CENPN	CENPN-202	ENST00000305850.9	protein_coding	CENPN	protein_coding	0.748521	0.597707	0.286837	0.763139	0.0120798	0	0.058591	1	1.36499e-06	0.000355818	TRUE	0.575494	0.575494	-0.260595
CENPN	CENPN-205	ENST00000439957.7	protein_coding	CENPN	protein_coding	0	0	0	0	0.12928	0.379747	0.272758	1	1.36499e-06	1	FALSE	-0.260595	0.575494	-0.260595
CENPT	CENPT-202	ENST00000440851.6	protein_coding	CENPT	protein_coding	0.0960298	0.048125	0.0721475	0.0200246	0	0	0	1	0.00186889	1	FALSE	0.0590817	0.0590817	-0.0757066
CENPT	CENPT-222	ENST00000566067.5	nonsense_mediated_decay	CENPT	protein_coding	0.0264883	0.0540749	0.017169	0	0.112324	0.114849	0.0732461	1	0.00186889	1	FALSE	-0.0757066	0.0590817	-0.0757066
CEP164	CEP164-205	ENST00000528706.5	retained_intron	CEP164	protein_coding	0.0462604	0.0586863	0.0496711	0.0489438	0.0802778	0.0654483	0.0836953	1	7.49282e-05	1	FALSE	-0.0255834		-0.108324
CEP164	CEP164-214	ENST00000639320.1	protein_coding	CEP164	protein_coding	0.0560215	0.0393276	0.0691049	0.0546419	0.170784	0.201359	0.117151	1	7.49282e-05	1	FALSE	-0.108324		-0.108324
CEP295	CEP295-201	ENST00000325212.11	protein_coding	CEP295	protein_coding	0.275234	0.35325	0.359258	0.32578	0.40566	0.520428	0.425127	1	0.0319829	1	FALSE	-0.122025		-0.122025
CEP41	CEP41-224	ENST00000675542.1	processed_transcript	CEP41	protein_coding	0	0	0	0	0.0654396	0.133141	0.108959	1	8.98617e-07	1	FALSE	-0.102513		-0.102513
CEP70	CEP70-212	ENST00000485115.1	protein_coding	CEP70	protein_coding	0.00796477	0.0550189	0.00922507	0	0.107051	0.0752925	0.0654823	1	0.0332968	1	FALSE	-0.0645564		-0.0645564
CEP85L	CEP85L-210	ENST00000483035.5	retained_intron	CEP85L	protein_coding	0.267747	0.288554	0.224856	0.227767	0.175562	0.116548	0.18496	1	0.0465334	1	FALSE	0.0932077	0.0932077
CEPT1	CEPT1-201	ENST00000357172.9	protein_coding	CEPT1	protein_coding	0.491241	0.371367	0.46386	0.474104	0.244329	0.24537	0.292528	1	5.52651e-05	0.0354267	TRUE	0.189401	0.189401	-0.0388446
CEPT1	CEPT1-203	ENST00000467362.1	processed_transcript	CEPT1	protein_coding	0.182191	0.197724	0.192724	0.205329	0.263454	0.219678	0.216877	1	5.52651e-05	1	FALSE	-0.0388446	0.189401	-0.0388446
CES4A	CES4A-202	ENST00000535543.5	nonsense_mediated_decay	CES4A	protein_coding	0.0886202	0.145994	0.13881	0.0607524	0.0315906	0.0498479	0.0298829	1	0.00161257	1	FALSE	0.0714369	0.0714369	-0.101251
CES4A	CES4A-206	ENST00000540579.6	protein_coding	CES4A	protein_coding	0.0642311	0	0.0412465	0.0288953	0.193649	0.0860548	0.124829	1	0.00161257	1	FALSE	-0.101251	0.0714369	-0.101251
CES4A	CES4A-208	ENST00000543561.1	retained_intron	CES4A	protein_coding	0.383034	0.440874	0.404455	0.404588	0.360032	0.335884	0.317013	1	0.00161257	1	FALSE	0.0705948	0.0714369	-0.101251
CES4A	CES4A-209	ENST00000544478.1	retained_intron	CES4A	protein_coding	0.0980391	0.106224	0.0882167	0.124578	0.0385253	0.0703665	0.0728884	1	0.00161257	1	FALSE	0.0436711	0.0714369	-0.101251
CFAP161	CFAP161-201	ENST00000286732.5	protein_coding	CFAP161	protein_coding	0.131868	1	0.354143	0.142686	0.788965	1	0.696746	0	0.0394974	0.0446	TRUE	-0.421396		-0.421396
CFAP298	CFAP298-202	ENST00000300260.7	nonsense_mediated_decay	CFAP298	protein_coding	0.130073	0	0	0.162506	0.187741	0.191335	0.243944	1	0.038343	1	FALSE	-0.134529		-0.134529
CFAP300	CFAP300-201	ENST00000434758.7	protein_coding	CFAP300	protein_coding	0.520591	0.785242	0.575871	0.699048	0.464162	0.519122	0.372978	1	0.000383787	0.75164	FALSE	0.193101	0.193101	-0.264941
CFAP300	CFAP300-202	ENST00000526781.5	protein_coding	CFAP300	protein_coding	0.0813438	0.0545658	0.184514	0.0405554	0.36492	0.360476	0.340163	1	0.000383787	0.0158032	TRUE	-0.264941	0.193101	-0.264941
CFAP43	CFAP43-205	ENST00000434629.5	protein_coding	CFAP43	protein_coding	0	0	0.0822602	0	0.163891	0.23822	0.145245	1	0.0319549	1	FALSE	-0.161887		-0.161887
CFAP44	CFAP44-202	ENST00000393845.9	protein_coding	CFAP44	protein_coding	0.306568	0.313399	0.295831	0.256097	0.192724	0.180938	0.162246	1	0.00573783	1	FALSE	0.114338	0.114338
CFAP44	CFAP44-208	ENST00000479422.1	retained_intron	CFAP44	protein_coding	0.0921452	0.201946	0.135932	0.0743626	0.0711262	0	0.0282796	1	0.00573783	1	FALSE	0.0929612	0.114338
CFAP74	CFAP74-203	ENST00000378592.1	retained_intron	CFAP74	protein_coding	0.677603	0.675471	0.687282	0.67755	0.480323	0.466671	0.623374	1	0.00251798	1	FALSE	0.156021	0.156021	-0.105972
CFAP74	CFAP74-206	ENST00000464311.5	retained_intron	CFAP74	protein_coding	0.0130002	0.00703534	0.0138127	0.0398829	0.0861772	0.107938	0.0417755	1	0.00251798	1	FALSE	-0.0601974	0.156021	-0.105972
CFAP74	CFAP74-210	ENST00000642590.1	protein_coding	CFAP74	protein_coding	0	0.0297309	0.0723871	0.0571793	0.152512	0.179225	0.105652	1	0.00251798	1	FALSE	-0.105972	0.156021	-0.105972
CFAP91	CFAP91-212	ENST00000482995.5	processed_transcript	CFAP91	protein_coding	0	0	0.0820711	0	0.309875	0.154702	0.161848	1	0.0328935	0.00225927	TRUE	-0.188291	0.196668	-0.188291
CFAP91	CFAP91-213	ENST00000483134.5	retained_intron	CFAP91	protein_coding	0.44258	0.394625	0.400174	0.764342	0.226681	0.330138	0.354468	1	0.0328935	1	FALSE	0.196668	0.196668	-0.188291
CFI	CFI-203	ENST00000504853.3	retained_intron	CFI	protein_coding	0.395363	0.354628	0.471195	0.465514	0.62812	0.737609	0.493016	1	0.0429276	1	FALSE	-0.197907	0.126818	-0.197907
CFI	CFI-204	ENST00000510800.1	protein_coding	CFI	protein_coding	0.255147	0.291643	0.256614	0.231275	0.228625	0	0.166929	1	0.0429276	1	FALSE	0.126818	0.126818	-0.197907
CHADL	CHADL-201	ENST00000216241.14	protein_coding	CHADL	protein_coding	0.362767	0.676115	0.579287	0.580228	1	0.424517	1	0	0.0212128	0	TRUE	-0.258573	0.258573	-0.258573
CHADL	CHADL-203	ENST00000455425.1	protein_coding	CHADL	protein_coding	0.637233	0.323885	0.420713	0.419772	0	0.575483	0	0	0.0212128	0	TRUE	0.258573	0.258573	-0.258573
CHASERR	CHASERR-205	ENST00000555227.1	retained_intron	CHASERR	lncRNA	0.249711	0.258528	0.250614	0.268424	0.138965	0.153086	0.177027	1	0.000253635	1	FALSE	0.10046	0.10046	-0.0819846
CHASERR	CHASERR-207	ENST00000556895.5	lncRNA	CHASERR	lncRNA	0	0.0337674	0	0	0.104373	0.0406939	0.126212	1	0.000253635	1	FALSE	-0.0819846	0.10046	-0.0819846
CHGB	CHGB-201	ENST00000378961.9	protein_coding	CHGB	protein_coding	0.464634	0.439085	0.638101	0.66567	0.826555	0.850147	0.767587	1	0.00685345	0	TRUE	-0.26289	0.26289	-0.26289
CHGB	CHGB-203	ENST00000488832.1	processed_transcript	CHGB	protein_coding	0.535366	0.560915	0.361899	0.33433	0.173445	0.149853	0.232413	1	0.00685345	0	TRUE	0.26289	0.26289	-0.26289
CHIC2	CHIC2-201	ENST00000263921.8	protein_coding	CHIC2	protein_coding	0.810886	0.803632	0.800598	0.838474	0.985509	0.962949	0.916842	1	0.00688196	0	TRUE	-0.141703	0.141703	-0.141703
CHIC2	CHIC2-202	ENST00000509678.1	retained_intron	CHIC2	protein_coding	0.189114	0.196368	0.199402	0.161526	0.0144914	0.0370514	0.0831579	1	0.00688196	0	TRUE	0.141703	0.141703	-0.141703
CHM	CHM-201	ENST00000357749.7	protein_coding	CHM	protein_coding	0.567939	0.62277	0.422113	0.511603	0.338013	0.345548	0.33131	1	0.000479569	0.350066	FALSE	0.192816	0.192816	-0.201134
CHM	CHM-204	ENST00000487515.1	processed_transcript	CHM	protein_coding	0	0	0.215435	0.0379911	0.307058	0.155761	0.330651	0	0.000479569	4.8147e-05	TRUE	-0.201134	0.192816	-0.201134
CHMP1A	CHMP1A-209	ENST00000550872.1	retained_intron	CHMP1A	protein_coding	0.1993	0.12701	0.217216	0.070679	0.312781	0.278078	0.340315	1	0.00673159	1	FALSE	-0.15684		-0.15684
CHN1	CHN1-201	ENST00000295497.12	protein_coding	CHN1	protein_coding	0.240061	0.319384	0.239633	0.120071	0	0.106911	0.110874	1	0.00711798	0.459004	FALSE	0.157192	0.157192	-0.267982
CHN1	CHN1-208	ENST00000443238.6	protein_coding	CHN1	protein_coding	0.260371	0.0794609	0	0.26204	0.318626	0.502918	0.433807	1	0.00711798	0.104623	FALSE	-0.267982	0.157192	-0.267982
CHPT1	CHPT1-203	ENST00000546873.1	nonsense_mediated_decay	CHPT1	protein_coding	0.183041	0.177239	0.202288	0.128361	0.0445418	0.0340939	0.0956298	1	0.00194309	1	FALSE	0.114644	0.114644	-0.238826
CHPT1	CHPT1-204	ENST00000549128.5	nonsense_mediated_decay	CHPT1	protein_coding	0.0415994	0.092564	0.129572	0.175077	0.375271	0.518035	0.152283	0	0.00194309	0.000296626	TRUE	-0.238826	0.114644	-0.238826
CHRNA3	CHRNA3-205	ENST00000559080.1	protein_coding	CHRNA3	protein_coding	0	0	0	0	0.118874	0.156965	0.267624	1	0.0296576	1	FALSE	-0.181154		-0.181154
CIC	CIC-203	ENST00000571942.2	protein_coding	CIC	protein_coding	0.132766	0.203047	0.182313	0.166733	0.0865734	0.0618833	0.126924	1	0.0445016	1	FALSE	0.0794211	0.0794211	-0.103109
CIC	CIC-204	ENST00000572681.6	protein_coding	CIC	protein_coding	0.264225	0.256299	0.25026	0.303126	0.222511	0.20694	0.223544	1	0.0445016	1	FALSE	0.0508128	0.0794211	-0.103109
CIC	CIC-207	ENST00000575354.6	protein_coding	CIC	protein_coding	0.271795	0.241478	0.295764	0.269551	0.394137	0.38732	0.33681	1	0.0445016	1	FALSE	-0.103109	0.0794211	-0.103109
CIITA	CIITA-201	ENST00000324288.13	protein_coding	CIITA	protein_coding	0.265351	0.283725	0.303949	0.359068	0.613793	0.628028	0.361493	1	1.26616e-05	0.151115	FALSE	-0.231415	0.111107	-0.231415
CIITA	CIITA-208	ENST00000572665.1	processed_transcript	CIITA	protein_coding	0.126239	0.115186	0.125306	0.118295	0	0	0.0304495	1	1.26616e-05	1	FALSE	0.111107	0.111107	-0.231415
CIITA	CIITA-212	ENST00000576601.1	protein_coding	CIITA	protein_coding	0.110832	0.0845893	0.0497075	0.143691	0	0	0	1	1.26616e-05	1	FALSE	0.097205	0.111107	-0.231415
CIP2A	CIP2A-204	ENST00000481530.5	nonsense_mediated_decay	CIP2A	protein_coding	0.157859	0	0	0.135298	0.466018	0.442405	0.437212	1	0.0321133	0.0265706	TRUE	-0.375256		-0.375256
CIRBP	CIRBP-217	ENST00000588230.5	protein_coding	CIRBP	protein_coding	0.130781	0.0324738	0.124384	0.106847	0	0	0.0276328	1	0.0373181	1	FALSE	0.0894106	0.0894106
CIT	CIT-208	ENST00000537607.5	processed_transcript	CIT	protein_coding	0	0	0	0	0.0839956	0.12126	0.0741634	1	2.27714e-09	1	FALSE	-0.0931397	0.181969	-0.174785
CIT	CIT-211	ENST00000543324.2	retained_intron	CIT	protein_coding	0.374288	0.267992	0.294599	0.260656	0.235371	0.255076	0.258241	1	2.27714e-09	1	FALSE	0.0498204	0.181969	-0.174785
CIT	CIT-217	ENST00000612548.4	protein_coding	CIT	protein_coding	0	0.0497682	0.132638	0.14996	0.293315	0.257281	0.223034	1	2.27714e-09	1.90172e-05	TRUE	-0.174785	0.181969	-0.174785
CIT	CIT-230	ENST00000678155.1	retained_intron	CIT	protein_coding	0.362347	0.512213	0.338867	0.387968	0.19989	0.176551	0.278698	1	2.27714e-09	0.0474262	TRUE	0.181969	0.181969	-0.174785
CKB	CKB-201	ENST00000348956.7	protein_coding	CKB	protein_coding	0.712794	0.719859	0.828919	0.792361	0.846634	0.862709	0.86364	1	4.20736e-09	1	FALSE	-0.0941775	0.0959202	-0.0941775
CKB	CKB-210	ENST00000554989.1	nonsense_mediated_decay	CKB	protein_coding	0.128	0.116998	0.0605086	0.0781742	0	0	0	1	4.20736e-09	1	FALSE	0.0959202	0.0959202	-0.0941775
CLASRP	CLASRP-207	ENST00000587112.1	nonsense_mediated_decay	CLASRP	protein_coding	0.0713215	0.0544751	0.0601031	0.0785774	0.164002	0.210512	0.183674	1	0.0267783	1	FALSE	-0.119944		-0.119944
CLCN2	CLCN2-201	ENST00000265593.9	protein_coding	CLCN2	protein_coding	0.157168	0.264541	0.224288	0.287148	0.137843	0	0.152215	1	0.0117453	1	FALSE	0.1366	0.1366
CLCNKA	CLCNKA-205	ENST00000477360.2	processed_transcript	CLCNKA	protein_coding	0	0	0	0.247271	0.362027	0.60033	0.657709	1	0.0021673	0.00716846	TRUE	-0.478204		-0.478204
CLDN5	CLDN5-202	ENST00000406028.1	protein_coding	CLDN5	protein_coding	0	0.00751098	0	0.0102895	0.513783	0.0928857	0.0505458	1	0.012353	0.057727	FALSE	-0.214622	0.433452	-0.214622
CLDN5	CLDN5-204	ENST00000618236.1	protein_coding	CLDN5	protein_coding	0.881811	0.878879	0.893201	0.884045	0	0.535453	0.817642	1	0.012353	0.010892	TRUE	0.433452	0.433452	-0.214622
CLEC18C	CLEC18C-204	ENST00000561612.1	processed_transcript	CLEC18C	protein_coding	0	0.0191495	0.0232475	0	0.337409	0.214916	0.497376	1	0.000129027	0.078965	FALSE	-0.339301	0.482128	-0.339301
CLEC18C	CLEC18C-206	ENST00000564976.5	retained_intron	CLEC18C	protein_coding	1	0.293387	0.484492	0.810421	0.0997039	0.395137	0	0	0.000129027	0.0299464	TRUE	0.482128	0.482128	-0.339301
CLK4	CLK4-201	ENST00000316308.9	protein_coding	CLK4	protein_coding	0.0678239	0.143771	0.111028	0.0904359	0	0	0	1	3.02394e-05	1	FALSE	0.103265	0.103265	-0.0525474
CLK4	CLK4-206	ENST00000520878.5	retained_intron	CLK4	protein_coding	0.0549166	0.055357	0.076565	0.0668538	0.0933772	0.130905	0.123629	1	3.02394e-05	1	FALSE	-0.0525474	0.103265	-0.0525474
CLN5	CLN5-205	ENST00000635905.1	retained_intron	CLN5	protein_coding	0.0970643	0.131432	0.133582	0.101131	0.1595	0.168905	0.133808	1	5.61619e-06	1	FALSE	-0.0382688		-0.0382688
CLNS1A	CLNS1A-201	ENST00000263309.7	protein_coding	CLNS1A	protein_coding	0.0620292	0.115985	0.0505005	0.0648106	0	0	0	1	6.28256e-05	1	FALSE	0.0733314	0.0733314	-0.0466969
CLNS1A	CLNS1A-204	ENST00000525428.6	protein_coding	CLNS1A	protein_coding	0.104976	0.15213	0.118486	0.157934	0.176949	0.189563	0.173723	1	6.28256e-05	1	FALSE	-0.0466969	0.0733314	-0.0466969
CLU	CLU-201	ENST00000316403.15	protein_coding	CLU	protein_coding	0.0641124	0.0717122	0.0969343	0.0965865	0.32272	0.347594	0.113023	1	0.00642078	0.0149553	TRUE	-0.178776	0.0491662	-0.178776
CLU	CLU-204	ENST00000519472.5	protein_coding	CLU	protein_coding	0.506888	0.477081	0.482941	0.479873	0.460595	0.42412	0.427874	1	0.00642078	1	FALSE	0.0491662	0.0491662	-0.178776
CNBD2	CNBD2-205	ENST00000538900.1	protein_coding	CNBD2	protein_coding	0.00902538	0.00941717	0	0	0.132947	0.165566	0.103173	1	0.000144311	1	FALSE	-0.129285		-0.129285
CNDP2	CNDP2-206	ENST00000577669.5	processed_transcript	CNDP2	protein_coding	0.0191333	0.0402568	0.0355433	0.0337925	0.137688	0.120223	0.0905317	1	0.0118857	1	FALSE	-0.083966	0.0955069	-0.083966
CNDP2	CNDP2-222	ENST00000583399.5	retained_intron	CNDP2	protein_coding	0.271932	0.270673	0.25667	0.208813	0.115058	0.186826	0.167661	1	0.0118857	1	FALSE	0.0955069	0.0955069	-0.083966
CNDP2	CNDP2-226	ENST00000584581.5	retained_intron	CNDP2	protein_coding	0.0600288	0.0467353	0.0437931	0.0448827	0.0942732	0.0664031	0.0716201	1	0.0118857	1	FALSE	-0.0285722	0.0955069	-0.083966
CNKSR1	CNKSR1-201	ENST00000361530.11	protein_coding	CNKSR1	protein_coding	0	0	0	0	0.129547	0.235587	0.155875	1	0.0110624	1	FALSE	-0.17367		-0.203849
CNKSR1	CNKSR1-214	ENST00000531191.5	protein_coding	CNKSR1	protein_coding	0	0.215226	0.0390151	0	0.229706	0.350428	0.222093	1	0.0110624	0.235387	FALSE	-0.203849		-0.203849
CNKSR3	CNKSR3-202	ENST00000433165.6	processed_transcript	CNKSR3	protein_coding	0.169905	0.268417	0.31814	0.3123	0.106431	0	0.297465	0	0.0291024	0.0149711	TRUE	0.132558	0.132558
CNOT1	CNOT1-205	ENST00000563283.1	retained_intron	CNOT1	protein_coding	0.142899	0.155586	0.138399	0.140184	0.0864811	0.0472071	0.0870682	1	0.00312414	1	FALSE	0.0706815	0.0706815	-0.0558859
CNOT1	CNOT1-214	ENST00000568917.1	protein_coding	CNOT1	protein_coding	0.0939698	0.102456	0.0851535	0.0628203	0.163835	0.149283	0.112839	1	0.00312414	1	FALSE	-0.0558859	0.0706815	-0.0558859
CNOT1	CNOT1-222	ENST00000570139.1	retained_intron	CNOT1	protein_coding	0.111651	0.0734598	0.111531	0.0871457	0.0425974	0.0438362	0.0598883	1	0.00312414	1	FALSE	0.0471728	0.0706815	-0.0558859
CNOT8	CNOT8-202	ENST00000403027.6	protein_coding	CNOT8	protein_coding	0.0874104	0.07093	0.0521071	0.0650115	0.137109	0.171187	0.116432	1	0.000192304	1	FALSE	-0.0727112	0.060268	-0.0829154
CNOT8	CNOT8-216	ENST00000521402.1	processed_transcript	CNOT8	protein_coding	0.0987923	0.04741	0.0751361	0.0730574	0.0133196	0	0.0266733	1	0.000192304	1	FALSE	0.060268	0.060268	-0.0829154
CNOT8	CNOT8-218	ENST00000521583.5	protein_coding	CNOT8	protein_coding	0.0205965	0.0125469	0.0268164	0.0450122	0.123958	0.112061	0.0914563	1	0.000192304	1	FALSE	-0.0829154	0.060268	-0.0829154
CNPY1	CNPY1-202	ENST00000406197.5	protein_coding	CNPY1	protein_coding	0		0	0	0.762764	0.825495	0.834682	1	2.13118e-06	1	FALSE
CNPY1	CNPY1-204	ENST00000636446.1	protein_coding	CNPY1	protein_coding	0.548711		0.847668	1	0	0	0	1	2.13118e-06	1	FALSE
CNTRL	CNTRL-202	ENST00000373845.6	processed_transcript	CNTRL	protein_coding	0.215204	0.162795	0.169017	0.196803	0.119418	0.138586	0.145393	1	0.000544191	1	FALSE	0.0514889	0.119165	-0.0592487
CNTRL	CNTRL-203	ENST00000373847.5	protein_coding	CNTRL	protein_coding	0.128606	0.0946789	0.138227	0.156965	0.0448928	0.0383939	0.0812219	1	0.000544191	1	FALSE	0.0747831	0.119165	-0.0592487
CNTRL	CNTRL-207	ENST00000373865.7	protein_coding	CNTRL	protein_coding	0.127703	0.187896	0.211738	0.197884	0.269759	0.215907	0.235995	1	0.000544191	1	FALSE	-0.0592487	0.119165	-0.0592487
CNTRL	CNTRL-210	ENST00000491018.1	processed_transcript	CNTRL	protein_coding	0.227472	0.163096	0.145186	0.113172	0.0246609	0.0299144	0.0746244	1	0.000544191	1	FALSE	0.119165	0.119165	-0.0592487
COBLL1	COBLL1-202	ENST00000375458.6	protein_coding	COBLL1	protein_coding	0.0912242	0.0863105	0.0416993	0.0353623	0.0336088	0	0.00875747	1	0.0364234	1	FALSE	0.049527	0.049527	-0.127234
COBLL1	COBLL1-203	ENST00000392717.6	protein_coding	COBLL1	protein_coding	0	0	0.0208519	0.037872	0.0787375	0.098835	0.0505007	1	0.0364234	1	FALSE	-0.0613434	0.049527	-0.127234
COBLL1	COBLL1-221	ENST00000493868.5	retained_intron	COBLL1	protein_coding	0.120842	0.165113	0.185643	0.192906	0.438064	0.246827	0.195189	1	0.0364234	1	FALSE	-0.127234	0.049527	-0.127234
COG4	COG4-201	ENST00000323786.10	protein_coding	COG4	protein_coding	0.140178	0.257572	0.227849	0.23945	0	0.0899045	0.123829	1	0.01617	1	FALSE	0.145018	0.145018
COL16A1	COL16A1-203	ENST00000373672.8	protein_coding	COL16A1	protein_coding	0.421547	0.450496	0.420183	0.451231	0.394155	0.293928	0.372254	1	5.82227e-09	1	FALSE	0.0824189	0.0824189	-0.0790067
COL16A1	COL16A1-208	ENST00000468459.5	processed_transcript	COL16A1	protein_coding	0	0	0.00554515	0	0.0943039	0.118083	0.0188932	1	5.82227e-09	1	FALSE	-0.0757069	0.0824189	-0.0790067
COL16A1	COL16A1-210	ENST00000474000.5	processed_transcript	COL16A1	protein_coding	0	0	0	0	0.115096	0.0671952	0.0547286	1	5.82227e-09	1	FALSE	-0.0790067	0.0824189	-0.0790067
COL16A1	COL16A1-213	ENST00000482910.1	retained_intron	COL16A1	protein_coding	0.0170936	0.0157073	0.0225979	0.0122378	0.0752406	0.0582143	0.0291697	1	5.82227e-09	1	FALSE	-0.037299	0.0824189	-0.0790067
COL1A2	COL1A2-201	ENST00000297268.11	protein_coding	COL1A2	protein_coding	0.644467	0.693189	0.712849	0.773739	0.832005	0.921287	0.787515	1	0.00307058	1	FALSE	-0.140875	0.139443	-0.140875
COL1A2	COL1A2-213	ENST00000620463.1	protein_coding	COL1A2	protein_coding	0.281589	0.256114	0.235995	0.168387	0.104116	0.0446931	0.139425	1	0.00307058	1	FALSE	0.139443	0.139443	-0.140875
COL26A1	COL26A1-201	ENST00000313669.12	protein_coding	COL26A1	protein_coding	0	0	0	0	0.166093	0.830417	0.567815	1	6.89668e-05	1	FALSE	-0.521442	0.631621	-0.521442
COL26A1	COL26A1-203	ENST00000613501.1	protein_coding	COL26A1	protein_coding	1	0.162894	1	1	0.477307	0	0	0	6.89668e-05	1.97575e-05	TRUE	0.631621	0.631621	-0.521442
COLCA2	COLCA2-202	ENST00000526216.1	protein_coding	COLCA2	protein_coding	0.285781	0.481482	0.183683	0.462559	0.550249	0.648546	0.529843	1	0.0237289	1	FALSE	-0.222837		-0.222837
COLEC11	COLEC11-208	ENST00000416132.5	nonsense_mediated_decay	COLEC11	protein_coding	0.0366259	0.0221435	0.0751202	0.0307425	0.206924	0.153872	0.0830028	1	0.00260363	1	FALSE	-0.106775	0.139195	-0.106775
COLEC11	COLEC11-213	ENST00000487365.5	processed_transcript	COLEC11	protein_coding	0.253988	0.133714	0.11719	0.0866001	0	0.0260333	0	1	0.00260363	1	FALSE	0.139195	0.139195	-0.106775
COMMD9	COMMD9-207	ENST00000533308.1	processed_transcript	COMMD9	protein_coding	0	0	0	0	0.0907535	0.106076	0.0872504	1	0.00924611	1	FALSE	-0.0946933		-0.0946933
COMT	COMT-205	ENST00000406520.7	protein_coding	COMT	protein_coding	0.333544	0.186879	0.296373	0.265562	0.142611	0.14833	0.135663	1	9.99355e-05	1	FALSE	0.128388	0.128388	-0.134995
COMT	COMT-207	ENST00000412786.5	protein_coding	COMT	protein_coding	0.075039	0.11174	0.106923	0.0768665	0.188397	0.185812	0.137484	1	9.99355e-05	1	FALSE	-0.0779223	0.128388	-0.134995
COMT	COMT-209	ENST00000449653.5	protein_coding	COMT	protein_coding	0	0.160469	0	0.160625	0.194063	0.260916	0.190826	1	9.99355e-05	4.25682e-05	TRUE	-0.134995	0.128388	-0.134995
COMT	COMT-220	ENST00000678868.1	protein_coding	COMT	protein_coding	0.0560008	0.0493364	0.0719208	0.0526617	0.106339	0.113894	0.0862006	1	9.99355e-05	1	FALSE	-0.0446645	0.128388	-0.134995
COPA	COPA-203	ENST00000481040.1	retained_intron	COPA	protein_coding	0.0840242	0.114457	0.0863325	0.0840873	0.0527732	0.0169792	0.0626745	1	2.73987e-05	1	FALSE	0.0480829	0.0480829
COPS3	COPS3-207	ENST00000477299.5	nonsense_mediated_decay	COPS3	protein_coding	0.063872	0.0820568	0.0518913	0.0671561	0	0	0	1	0.00016877	1	FALSE	0.0662441	0.0662441
COPS6	COPS6-204	ENST00000426712.1	nonsense_mediated_decay	COPS6	protein_coding	0	0.140265	0	0.235448	0.24377	0.239822	0.164473	0	0.0131433	0.00271824	TRUE	-0.122093		-0.122093
COPS6	COPS6-206	ENST00000468499.5	retained_intron	COPS6	protein_coding	0.00554765	0.00946238	0.0144887	0.0204333	0.046567	0.0728991	0.0596051	1	0.0131433	1	FALSE	-0.0472074		-0.122093
COX14	COX14-201	ENST00000317943.6	protein_coding	COX14	protein_coding	0.083452	0.10045	0.127653	0.191977	0.306639	0.526985	0.201372	1	0.0269579	0.0112079	TRUE	-0.219116		-0.219116
COX6C	COX6C-202	ENST00000517682.6	protein_coding	COX6C	protein_coding	0.194574	0.0547583	0	0.204209	0.393815	0.585347	0.226264	1	0.0223868	0.702346	FALSE	-0.288423	0.278344	-0.288423
COX6C	COX6C-207	ENST00000522934.5	nonsense_mediated_decay	COX6C	protein_coding	0.638868	0.863934	0.800109	0.360305	0.592179	0	0.570202	0	0.0223868	0.0337761	TRUE	0.278344	0.278344	-0.288423
CPS1	CPS1-205	ENST00000470791.1	retained_intron	CPS1	protein_coding	0.117158	0.0588987	0.0360727	0.0306441	0	0	0	1	0.000602637	1	FALSE	0.0606933	0.0606933	-0.178397
CPS1	CPS1-206	ENST00000479988.1	retained_intron	CPS1	protein_coding	0.314941	0.367871	0.336547	0.350311	0.619941	0.524622	0.417879	1	0.000602637	1	FALSE	-0.178397	0.0606933	-0.178397
CPSF6	CPSF6-202	ENST00000435070.7	protein_coding	CPSF6	protein_coding	0.436965	0.398873	0.373038	0.475951	0.368773	0.366046	0.359038	1	0.00787345	1	FALSE	0.0565875	0.0565875	-0.116079
CPSF6	CPSF6-203	ENST00000456847.7	protein_coding	CPSF6	protein_coding	0.0666571	0.0782998	0.14485	0	0.158471	0.236241	0.17088	1	0.00787345	1	FALSE	-0.116079	0.0565875	-0.116079
CPSF7	CPSF7-222	ENST00000544585.5	protein_coding	CPSF7	protein_coding	0	0	0.056776	0.0683413	0.18145	0.193907	0.0923493	1	0.00194309	1	FALSE	-0.124623		-0.124623
CRAT	CRAT-201	ENST00000318080.7	protein_coding	CRAT	protein_coding	0.691349	0.572173	0.552429	0.643999	0.498384	0.53176	0.54447	1	0.00801103	1	FALSE	0.0901164	0.0901164	-0.0780536
CRAT	CRAT-203	ENST00000415948.5	nonsense_mediated_decay	CRAT	protein_coding	0.02808	0.0302724	0.0420472	0.013605	0.172718	0.104371	0.0425753	1	0.00801103	1	FALSE	-0.0780536	0.0901164	-0.0780536
CRAT	CRAT-204	ENST00000441796.1	nonsense_mediated_decay	CRAT	protein_coding	0.0347606	0	0	0.037919	0.0552009	0.0461778	0.0544691	1	0.00801103	1	FALSE	-0.0337794	0.0901164	-0.0780536
CRAT	CRAT-208	ENST00000464290.5	processed_transcript	CRAT	protein_coding	0	0.0125555	0.00958424	0.0109018	0.0599015	0.0716994	0.0383227	1	0.00801103	1	FALSE	-0.0483808	0.0901164	-0.0780536
CREB1	CREB1-203	ENST00000418081.5	nonsense_mediated_decay	CREB1	protein_coding	0.0237417	0.0334715	0.0510741	0.0688419	0.0928339	0.0984253	0.0873678	1	0.000673767	1	FALSE	-0.0485934	0.141619	-0.0822264
CREB1	CREB1-210	ENST00000451164.1	processed_transcript	CREB1	protein_coding	0.0297154	0.0518495	0.0638924	0.0574474	0.179612	0.106167	0.113078	1	0.000673767	1	FALSE	-0.0822264	0.141619	-0.0822264
CREB1	CREB1-214	ENST00000464407.1	retained_intron	CREB1	protein_coding	0.0727252	0.0765903	0.080455	0.0738359	0.0420834	0.0492198	0.0711542	1	0.000673767	1	FALSE	0.0217491	0.141619	-0.0822264
CREB1	CREB1-216	ENST00000494094.5	retained_intron	CREB1	protein_coding	0.312822	0.233141	0.127186	0.138345	0	0.0695083	0.114254	1	0.000673767	0.0279188	TRUE	0.141619	0.141619	-0.0822264
CRELD2	CRELD2-201	ENST00000328268.9	protein_coding	CRELD2	protein_coding	0.756138	0.76378	0.704626	0.683699	0.360165	0.467769	0.512567	1	1.80679e-07	1.01727e-05	TRUE	0.280228	0.280228	-0.158166
CRELD2	CRELD2-203	ENST00000404488.7	protein_coding	CRELD2	protein_coding	0.0235152	0.0266172	0.0216951	0.0810255	0.24118	0.225447	0.122511	1	1.80679e-07	1	FALSE	-0.158166	0.280228	-0.158166
CRELD2	CRELD2-211	ENST00000498354.5	processed_transcript	CRELD2	protein_coding	0.0164946	0.0198687	0.0271801	0.0312979	0.0925265	0.0557461	0.110912	1	1.80679e-07	1	FALSE	-0.0626843	0.280228	-0.158166
CRYAB	CRYAB-216	ENST00000616970.5	protein_coding	CRYAB	protein_coding	0.234982	0.309525	0.163405	0.235725	0	0	0.0861978	1	0.0080161	0.00585068	TRUE	0.207176	0.207176
CRYL1	CRYL1-201	ENST00000298248.12	protein_coding	CRYL1	protein_coding	0.374793	0.344908	0.383741	0.151858	0.0913188	0	0.0856789	1	2.2013e-05	4.603e-05	TRUE	0.254826	0.254826	-0.286978
CRYL1	CRYL1-204	ENST00000643035.1	nonsense_mediated_decay	CRYL1	protein_coding	0.179872	0.298582	0.245036	0.335795	0.69086	0.527015	0.437521	1	2.2013e-05	0.00531012	TRUE	-0.286978	0.254826	-0.286978
CSK	CSK-202	ENST00000439220.6	protein_coding	CSK	protein_coding	0	0	0	0.0892327	0.241306	0.155843	0.101112	1	0.0227952	1	FALSE	-0.143779		-0.143779
CSMD3	CSMD3-207	ENST00000493303.1	retained_intron	CSMD3	protein_coding	0.802769	0.833498	0.447272	0.52054	0.271525	0.197118	0.395868	1	0.0104836	0.113721	FALSE	0.36285	0.36285
CSNK1A1	CSNK1A1-215	ENST00000661952.1	nonsense_mediated_decay	CSNK1A1	protein_coding	0.0433133	0.0261616	0.0406332	0.0597053	0.0769211	0.076275	0.0669747	1	0.0045454	1	FALSE	-0.0309369		-0.0309369
CSNK1G3	CSNK1G3-201	ENST00000345990.8	protein_coding	CSNK1G3	protein_coding	0.316964	0.386111	0.308549	0.385976	0.198225	0.282222	0.292809	1	0.00515314	1	FALSE	0.0916483	0.0916483
CSNK2B	CSNK2B-204	ENST00000375885.8	protein_coding	CSNK2B	protein_coding	0	0	0.0168648	0	0.0814162	0.0966644	0.0573388	1	1.49436e-06	1	FALSE	-0.0742569	0.0403457	-0.0742569
CSNK2B	CSNK2B-207	ENST00000475875.2	retained_intron	CSNK2B	protein_coding	0.125556	0.125144	0.112828	0.104402	0.0842401	0.0610727	0.0845976	1	1.49436e-06	1	FALSE	0.0403457	0.0403457	-0.0742569
CSRNP2	CSRNP2-201	ENST00000228515.6	protein_coding	CSRNP2	protein_coding	0.304335	0.304987	0.350805	0.30706	0.444716	0.46539	0.399076	1	0.0277302	1	FALSE	-0.119597	0.151964	-0.119597
CSRNP2	CSRNP2-205	ENST00000550461.1	processed_transcript	CSRNP2	protein_coding	0.259688	0.223949	0.191497	0.192622	0.0487272	0.0209099	0.125288	1	0.0277302	1	FALSE	0.151964	0.151964	-0.119597
CSTF1	CSTF1-202	ENST00000415828.5	protein_coding	CSTF1	protein_coding	0	0.144501	0.210123	0	0.210831	0.219192	0.24386	1	0.018111	0.0183926	TRUE	-0.135972		-0.135972
CTCFL	CTCFL-201	ENST00000243914.7	protein_coding	CTCFL	protein_coding	0	0.0615803	0.485521	0.429629	0.754412	0.668655	0.682388	1	0.00318391	0.00144018	TRUE	-0.457636	0.285541	-0.457636
CTCFL	CTCFL-214	ENST00000608108.1	retained_intron	CTCFL	protein_coding	0.409875	0.477792	0.304063	0.331094	0.0900457	0.0993781	0.0960699	1	0.00318391	1	FALSE	0.285541	0.285541	-0.457636
CTDSP2	CTDSP2-201	ENST00000398073.7	protein_coding	CTDSP2	protein_coding	0.564562	0.525768	0.597872	0.559494	0.382385	0.431121	0.493053	1	0.0358655	1	FALSE	0.126405	0.126405	-0.0868996
CTDSP2	CTDSP2-202	ENST00000547169.5	retained_intron	CTDSP2	protein_coding	0.132149	0.148088	0.157832	0.132989	0.25302	0.27186	0.164113	1	0.0358655	1	FALSE	-0.0868996	0.126405	-0.0868996
CTNNB1	CTNNB1-210	ENST00000453024.6	protein_coding	CTNNB1	protein_coding	0	0	0.00752324	0	0.0963189	0.108779	0.0152705	1	0.0172929	1	FALSE	-0.0715752		-0.0715752
CTNND1	CTNND1-201	ENST00000358694.10	protein_coding	CTNND1	protein_coding	0.25843	0.275578	0.313028	0.361645	0.240374	0.229871	0.224237	1	0.000209586	1	FALSE	0.0706763	0.0706763	-0.109349
CTNND1	CTNND1-221	ENST00000529919.5	protein_coding	CTNND1	protein_coding	0.0181708	0.0277223	0.0363626	0.0237963	0.154275	0.179699	0.0736131	1	0.000209586	1	FALSE	-0.109349	0.0706763	-0.109349
CTSA	CTSA-207	ENST00000484855.3	retained_intron	CTSA	protein_coding	0.0893499	0.0868282	0.155444	0.0561197	0.0302895	0	0.0528906	1	0.0049816	1	FALSE	0.0692088	0.0692088	-0.14365
CTSA	CTSA-236	ENST00000678939.1	nonsense_mediated_decay	CTSA	protein_coding	0.0295564	0	0.0566731	0.0689523	0.293968	0.178181	0.075187	1	0.0049816	0.0383223	TRUE	-0.14365	0.0692088	-0.14365
CTSB	CTSB-202	ENST00000353047.11	protein_coding	CTSB	protein_coding	0.393689	0.158443	0.326997	0.399631	0.441291	0.538497	0.492661	1	6.52015e-11	0.176242	FALSE	-0.171126	0.255346	-0.171126
CTSB	CTSB-204	ENST00000453527.7	protein_coding	CTSB	protein_coding	0.216301	0.458613	0.192378	0.154094	0	0	0	1	6.52015e-11	1	FALSE	0.255346	0.255346	-0.171126
CTSB	CTSB-228	ENST00000534382.6	protein_coding	CTSB	protein_coding	0.133747	0.0623724	0.169696	0.186273	0.202007	0.211446	0.188023	1	6.52015e-11	1	FALSE	-0.0624698	0.255346	-0.171126
CTSB	CTSB-238	ENST00000677082.1	protein_coding	CTSB	protein_coding	0.105973	0.0896968	0.142839	0.0795525	0.167047	0.167221	0.178242	1	6.52015e-11	1	FALSE	-0.0663213	0.255346	-0.171126
CTSC	CTSC-201	ENST00000227266.10	protein_coding	CTSC	protein_coding	0.616705	0.634602	0.545159	0.495342	0.230567	0.208572	0.494	1	0.00239161	0.00010436	TRUE	0.261905	0.261905	-0.172715
CTSC	CTSC-203	ENST00000524463.6	protein_coding	CTSC	protein_coding	0.182965	0.141111	0.22296	0.247586	0.263407	0.341937	0.259863	1	0.00239161	1	FALSE	-0.0897471	0.261905	-0.172715
CTSC	CTSC-209	ENST00000534131.2	processed_transcript	CTSC	protein_coding	0.149836	0.173046	0.171956	0.183936	0.459054	0.377708	0.190463	1	0.00239161	0.04023	TRUE	-0.172715	0.261905	-0.172715
CTSK	CTSK-207	ENST00000676824.1	protein_coding	CTSK	protein_coding	0.653567	0.625114	0.416222	0.314015	0	0.0961863	0.513136	0	0.015816	2.20686e-05	TRUE	0.299122	0.299122	-0.041411
CTSK	CTSK-215	ENST00000678725.1	retained_intron	CTSK	protein_coding	0.0287786	0.0186392	0.0296944	0.0414	0.0828788	0.0843363	0.045902	1	0.015816	1	FALSE	-0.041411	0.299122	-0.041411
CUTA	CUTA-203	ENST00000374500.10	protein_coding	CUTA	protein_coding	0.101077	0.0721699	0.154362	0.0815725	0.24577	0.302841	0.17416	1	0.0316668	1	FALSE	-0.138628	0.0898147	-0.138628
CUTA	CUTA-214	ENST00000607266.5	protein_coding	CUTA	protein_coding	0.240565	0.247178	0.254315	0.207211	0.157373	0.119993	0.165142	1	0.0316668	1	FALSE	0.0898147	0.0898147	-0.138628
CYB561A3	CYB561A3-201	ENST00000294072.9	protein_coding	CYB561A3	protein_coding	0.558462	0.362296	0.354178	0.282713	0.130706	0.121197	0.297084	0	2.17186e-05	0.000932802	TRUE	0.206417	0.206417	-0.0631937
CYB561A3	CYB561A3-202	ENST00000426130.6	protein_coding	CYB561A3	protein_coding	0.0649981	0.0587747	0.0759369	0.0940781	0.158333	0.13284	0.118748	1	2.17186e-05	1	FALSE	-0.0631937	0.206417	-0.0631937
CYB5R2	CYB5R2-204	ENST00000524790.5	protein_coding	CYB5R2	protein_coding	0.051926	0.0541974	0.0386134	0.0652808	0.0336855	0.0106214	0.0271746	1	0.0493716	1	FALSE	0.0286772	0.0286772	-0.0883198
CYB5R2	CYB5R2-212	ENST00000533558.5	protein_coding	CYB5R2	protein_coding	0.0152291	0.0153479	0	0.02623	0.0746192	0.108296	0.12465	1	0.0493716	1	FALSE	-0.0883198	0.0286772	-0.0883198
CYCS	CYCS-202	ENST00000409409.5	protein_coding	CYCS	protein_coding	0.386591	0.284294	0.540819	0.411896	0.218347	0.15879	0.216514	1	0.00211104	0.00131413	TRUE	0.208016	0.208016	-0.224585
CYCS	CYCS-203	ENST00000409764.5	protein_coding	CYCS	protein_coding	0.306513	0.369124	0.208608	0.288599	0.473094	0.581727	0.498566	1	0.00211104	0.000954433	TRUE	-0.224585	0.208016	-0.224585
CYFIP2	CYFIP2-201	ENST00000435847.6	protein_coding	CYFIP2	protein_coding	0	0	0	0	0.140971	0.22032	0.0356679	1	0.0430787	1	FALSE	-0.13232	0.0358193	-0.13232
CYFIP2	CYFIP2-207	ENST00000520942.1	retained_intron	CYFIP2	protein_coding	0.112859	0.0655895	0.0909578	0.0717141	0.0484849	0.0353939	0.0645037	1	0.0430787	1	FALSE	0.0358193	0.0358193	-0.13232
CYP4V2	CYP4V2-202	ENST00000502665.1	processed_transcript	CYP4V2	protein_coding	0.0969786	0.231574	0.261993	0.435724	0.450063	0.609661	0.421909	0	0.0286238	0.00444908	TRUE	-0.23731		-0.23731
CYRIB	CYRIB-227	ENST00000523514.1	retained_intron	CYRIB	protein_coding	0.371761	0.39535	0.381429	0.321909	0.461027	0.397953	0.413474	1	0.0315649	1	FALSE	-0.0565391		-0.0565391
CYTH2	CYTH2-203	ENST00000427476.4	protein_coding	CYTH2	protein_coding	0	0.0144581	0.0288447	0.00512711	0.0993366	0.104001	0.0956175	1	2.02725e-05	1	FALSE	-0.0875441		-0.0875441
CZIB	CZIB-207	ENST00000602807.1	retained_intron	CZIB	protein_coding	0.0274126	0.0815089	0	0	0.0971837	0.0914691	0.104188	1	0.00923002	1	FALSE	-0.0703834		-0.0703834
D2HGDH	D2HGDH-201	ENST00000321264.9	protein_coding	D2HGDH	protein_coding	0.265112	0.295416	0.287502	0.190889	0.14255	0.154895	0.177301	1	0.0462371	1	FALSE	0.101481	0.101481	-0.0918266
D2HGDH	D2HGDH-216	ENST00000496252.5	processed_transcript	D2HGDH	protein_coding	0.0534702	0.0337982	0	0.0831445	0.175006	0.135657	0.0926267	1	0.0462371	1	FALSE	-0.0918266	0.101481	-0.0918266
DAAM2	DAAM2-201	ENST00000274867.9	protein_coding	DAAM2	protein_coding	0.447715	0.405235	0.413208	0.47364	0.0872572	0.245374	0.216373	1	5.36356e-15	4.92025e-09	TRUE	0.251948	0.251948	-0.147259
DAAM2	DAAM2-202	ENST00000398904.6	protein_coding	DAAM2	protein_coding	0	0	0.0286505	0	0.202878	0.135005	0.125382	1	5.36356e-15	1	FALSE	-0.147259	0.251948	-0.147259
DAB2IP	DAB2IP-203	ENST00000373782.7	protein_coding	DAB2IP	protein_coding	0.0871441	0.0180946	0.163554	0.168513	0.286381	0.381785	0.255639	1	3.8608e-05	3.83683e-05	TRUE	-0.198609	0.166104	-0.198609
DAB2IP	DAB2IP-205	ENST00000408936.7	protein_coding	DAB2IP	protein_coding	0.262617	0.194662	0.189283	0.22153	0.117009	0.100673	0.156193	1	3.8608e-05	1	FALSE	0.0923982	0.166104	-0.198609
DAB2IP	DAB2IP-212	ENST00000648693.1	protein_coding	DAB2IP	protein_coding	0.382171	0.34963	0.388315	0.376701	0.169293	0.172985	0.282021	1	3.8608e-05	1	FALSE	0.166104	0.166104	-0.198609
DALRD3	DALRD3-201	ENST00000313778.9	protein_coding	DALRD3	protein_coding	0.17662	0.235742	0.194801	0.145244	0.354055	0.338924	0.256187	1	0.000188605	1	FALSE	-0.128287	0.072443	-0.128287
DALRD3	DALRD3-207	ENST00000460505.5	retained_intron	DALRD3	protein_coding	0.0799705	0.0801896	0.0457897	0.0838221	0	0	0	1	0.000188605	1	FALSE	0.072443	0.072443	-0.128287
DALRD3	DALRD3-208	ENST00000467457.5	retained_intron	DALRD3	protein_coding	0	0	0	0	0.0845388	0.0615433	0.0432854	1	0.000188605	1	FALSE	-0.0631225	0.072443	-0.128287
DAZAP2	DAZAP2-203	ENST00000436900.2	nonsense_mediated_decay	DAZAP2	protein_coding	0.248605	0.269396	0.363292	0.463161	0.152724	0	0.336174	0	0.0152565	0.0345329	TRUE	0.173148	0.173148
DBNDD2	DBNDD2-202	ENST00000360981.8	protein_coding	DBNDD2	protein_coding	0.601757	0.590791	0.282413	0.552995	0.243631	0	0	1	1.52883e-06	1.34362e-09	TRUE	0.425779	0.425779	-0.15225
DBNDD2	DBNDD2-206	ENST00000372720.7	protein_coding	DBNDD2	protein_coding	0.0313344	0.0261813	0.0469948	0.0354845	0.127334	0.0996925	0.152365	1	1.52883e-06	1	FALSE	-0.0914651	0.425779	-0.15225
DBNDD2	DBNDD2-208	ENST00000372723.7	protein_coding	DBNDD2	protein_coding	0.0966754	0.0772829	0.181114	0.042222	0.201683	0.291401	0.261635	1	1.52883e-06	1	FALSE	-0.15225	0.425779	-0.15225
DBNL	DBNL-210	ENST00000448521.6	protein_coding	DBNL	protein_coding	0.262442	0.2257	0.218283	0.25846	0.320222	0.403664	0.330327	1	7.99948e-05	1	FALSE	-0.110183	0.23266	-0.110641
DBNL	DBNL-219	ENST00000490734.6	protein_coding	DBNL	protein_coding	0	0	0	0.112629	0.118815	0.137278	0.160303	1	7.99948e-05	1	FALSE	-0.110641	0.23266	-0.110641
DBNL	DBNL-220	ENST00000494774.5	protein_coding	DBNL	protein_coding	0.378575	0.434355	0.29049	0.319132	0.131934	0	0.236999	1	7.99948e-05	0.00150873	TRUE	0.23266	0.23266	-0.110641
DCAF1	DCAF1-201	ENST00000335891.5	protein_coding	DCAF1	protein_coding	0.491095	0.455726	0.491525	0.453125	0.345916	0.354389	0.423249	1	0.00663544	1	FALSE	0.0983493	0.0983493	-0.0495486
DCAF1	DCAF1-202	ENST00000423656.5	protein_coding	DCAF1	protein_coding	0.508905	0.544274	0.482647	0.546875	0.561026	0.587674	0.561971	1	0.00663544	1	FALSE	-0.0495486	0.0983493	-0.0495486
DCAF11	DCAF11-201	ENST00000326009.9	nonsense_mediated_decay	DCAF11	protein_coding	0.0933292	0.0505996	0.0634663	0.0766782	0	0	0	1	0.0402522	1	FALSE	0.0710183	0.0710183	-0.0450319
DCAF11	DCAF11-224	ENST00000559472.1	retained_intron	DCAF11	protein_coding	0.0566872	0.0262055	0.0632177	0.0528919	0.0737896	0.0999683	0.11059	1	0.0402522	1	FALSE	-0.0450319	0.0710183	-0.0450319
DCDC1	DCDC1-201	ENST00000303697.8	nonsense_mediated_decay	DCDC1	protein_coding	0.635824	0.494788	0.285281	0.281196	0.142615	0.111836	0.162977	1	0.00605153	0.153555	FALSE	0.28513	0.28513	-0.0970855
DCDC1	DCDC1-205	ENST00000437348.5	processed_transcript	DCDC1	protein_coding	0	0	0	0	0.0735878	0.085552	0.132117	1	0.00605153	1	FALSE	-0.0970855	0.28513	-0.0970855
DCLRE1A	DCLRE1A-201	ENST00000361384.7	protein_coding	DCLRE1A	protein_coding	1	0.644599	0.820983	0.870089	0.341779	0.303474	0.816419	0	0.0243972	0.0480544	TRUE	0.346694	0.346694	-0.330567
DCLRE1A	DCLRE1A-202	ENST00000369305.1	protein_coding	DCLRE1A	protein_coding	0	0.131021	0.179017	0	0.434217	0.606432	0.183581	1	0.0243972	0.0076416	TRUE	-0.330567	0.346694	-0.330567
DCP2	DCP2-207	ENST00000513585.6	protein_coding	DCP2	protein_coding	0	0	0.013166	0	0.0552269	0.0745543	0.0533401	1	0.0134004	1	FALSE	-0.0577489		-0.0577489
DDAH2	DDAH2-201	ENST00000375787.6	protein_coding	DDAH2	protein_coding	0.38652	0.214244	0.389852	0.229921	0	0	0.236431	0	0.00417886	0.000640908	TRUE	0.226324	0.226324
DDAH2	DDAH2-207	ENST00000469963.5	retained_intron	DDAH2	protein_coding	0.0980256	0.104006	0.141559	0.117502	0.0742642	0.0600106	0.0500234	1	0.00417886	1	FALSE	0.0538406	0.226324
DDIT3	DDIT3-206	ENST00000623876.2	protein_coding	DDIT3	protein_coding	0.0114846	0.0160831	0.0200452	0	0.0699768	0.0562996	0.0843164	1	0.0131293	1	FALSE	-0.0582943		-0.0582943
DDX11-AS1	DDX11-AS1-203	ENST00000618041.1	lncRNA	DDX11-AS1	lncRNA	0.46051	0.629126	0.434279	0.382674	0	0	0.322139	1	0.015938	0.00520941	TRUE	0.369268	0.369268
DDX11L9	DDX11L9-201	ENST00000559159.5	processed_transcript	DDX11L9	transcribed_unprocessed_pseudogene	1	1	1	0.931395	0.887366	0.657452	0.5691	1	0.036286	0	TRUE	0.27821	0.27821	-0.27821
DDX11L9	DDX11L9-203	ENST00000562189.1	processed_transcript	DDX11L9	transcribed_unprocessed_pseudogene	0	0	0	0.0686046	0.112634	0.342548	0.4309	1	0.036286	0	TRUE	-0.27821	0.27821	-0.27821
DDX17	DDX17-203	ENST00000403230.3	protein_coding	DDX17	protein_coding	0.190323	0.15081	0.174072	0.271073	0.0477654	0.139305	0.125244	1	0.0433866	1	FALSE	0.0924648	0.0924648
DDX19B	DDX19B-203	ENST00000393657.6	protein_coding	DDX19B	protein_coding	0.111419	0.141936	0.0743993	0.138198	0	0.0368148	0	1	9.52227e-14	1	FALSE	0.104216	0.104216	-0.195194
DDX19B	DDX19B-205	ENST00000562519.5	nonsense_mediated_decay	DDX19B	protein_coding	0	0	0	0	0.105714	0.0352076	0.0994368	1	9.52227e-14	1	FALSE	-0.0801196	0.104216	-0.195194
DDX19B	DDX19B-206	ENST00000562912.5	nonsense_mediated_decay	DDX19B	protein_coding	0.0763701	0.0772476	0.101786	0.115197	0.0251577	0.0600084	0.0511949	1	9.52227e-14	1	FALSE	0.0471964	0.104216	-0.195194
DDX19B	DDX19B-207	ENST00000563206.5	protein_coding	DDX19B	protein_coding	0	0	0	0	0.20672	0.223157	0.155706	1	9.52227e-14	1	FALSE	-0.195194	0.104216	-0.195194
DDX24	DDX24-201	ENST00000330836.9	protein_coding	DDX24	protein_coding	0.0340551	0.0566783	0.0626529	0.0552504	0	0.0282966	0	1	0.00104132	1	FALSE	0.0427269	0.0427269	-0.117523
DDX24	DDX24-205	ENST00000555054.1	protein_coding	DDX24	protein_coding	0.100619	0.111297	0	0.127579	0.228275	0.238459	0.140457	1	0.00104132	1	FALSE	-0.117523	0.0427269	-0.117523
DDX24	DDX24-208	ENST00000556635.1	retained_intron	DDX24	protein_coding	0.063375	0.0578959	0.050082	0.0588818	0.0369807	0.0275821	0.0481086	1	0.00104132	1	FALSE	0.0200015	0.0427269	-0.117523
DDX25	DDX25-201	ENST00000263576.11	protein_coding	DDX25	protein_coding	0.308771	0.709412	0.166525	0.261699	0.148541	0.0868527	0.13153	1	0.00599215	1	FALSE	0.239294	0.239294	-0.36926
DDX25	DDX25-202	ENST00000525943.1	protein_coding	DDX25	protein_coding	0	0	0.290141	0	0.405265	0.598496	0.321624	1	0.00599215	0.000242537	TRUE	-0.36926	0.239294	-0.36926
DDX25	DDX25-205	ENST00000530414.5	protein_coding	DDX25	protein_coding	0.436759	0.290588	0.240898	0.343591	0.203198	0.106668	0.129997	1	0.00599215	1	FALSE	0.181338	0.239294	-0.36926
DDX39A	DDX39A-212	ENST00000590260.5	retained_intron	DDX39A	protein_coding	0.0845641	0.193323	0.0645311	0.0898227	0.0568091	0.0542892	0.0420805	1	0.00609233	1	FALSE	0.0570007	0.0570007	-0.100289
DDX39A	DDX39A-214	ENST00000590556.1	retained_intron	DDX39A	protein_coding	0.077297	0.0920794	0.0464162	0.0594536	0.0245219	0.0402102	0.00796472	1	0.00609233	1	FALSE	0.0445793	0.0570007	-0.100289
DDX39A	DDX39A-215	ENST00000590696.1	protein_coding	DDX39A	protein_coding	0	0	0.0229383	0.0456098	0.133688	0.131544	0.087047	1	0.00609233	1	FALSE	-0.100289	0.0570007	-0.100289
DDX39A	DDX39A-218	ENST00000592632.5	retained_intron	DDX39A	protein_coding	0.0509793	0.101591	0.0591429	0.0840473	0.013199	0.0169794	0.0386709	1	0.00609233	1	FALSE	0.0509904	0.0570007	-0.100289
DDX39A	DDX39A-219	ENST00000592927.5	nonsense_mediated_decay	DDX39A	protein_coding	0.0318794	0	0.0516072	0	0.0626991	0.0628417	0.083429	1	0.00609233	1	FALSE	-0.048785	0.0570007	-0.100289
DDX3Y	DDX3Y-201	ENST00000336079.8	protein_coding	DDX3Y	protein_coding	0.393881	0.312844	0.510899	0.456771	0.651724	0.664377	0.51524	1	0.0173125	0.0108012	TRUE	-0.191848	0.0653409	-0.191848
DDX3Y	DDX3Y-205	ENST00000463199.1	processed_transcript	DDX3Y	protein_coding	0.110961	0.160135	0.0936465	0.133975	0.0379776	0.0584277	0.0816103	1	0.0173125	1	FALSE	0.0653409	0.0653409	-0.191848
DDX3Y	DDX3Y-207	ENST00000472510.5	processed_transcript	DDX3Y	protein_coding	0.104119	0.092631	0.101778	0.10624	0.0287191	0.0430884	0.0613889	1	0.0173125	1	FALSE	0.0567932	0.0653409	-0.191848
DDX60L	DDX60L-203	ENST00000505150.5	processed_transcript	DDX60L	protein_coding	0	0	0	0.0131501	0.094355	0.0823367	0.0414853	1	0.0298747	1	FALSE	-0.0694381		-0.0694381
DENND10	DENND10-201	ENST00000361432.3	protein_coding	DENND10	protein_coding	0.27281	0.313817	0.313297	0.248162	0.0567028	0.105786	0.18648	1	0.0483131	0.00352493	TRUE	0.170698	0.170698
DENND2C	DENND2C-201	ENST00000393274.6	protein_coding	DENND2C	protein_coding	0.36257	0.21369	0.356643	0.405165	0.645377	0.645252	0.527211	1	5.4527e-05	2.20545e-06	TRUE	-0.27143	0.235273	-0.27143
DENND2C	DENND2C-202	ENST00000393276.7	protein_coding	DENND2C	protein_coding	0.480278	0.590039	0.467486	0.456421	0.23086	0.235414	0.323573	1	5.4527e-05	4.40795e-05	TRUE	0.235273	0.235273	-0.27143
DENND4A	DENND4A-204	ENST00000562028.1	retained_intron	DENND4A	protein_coding	0.0572738	0.0820764	0.0660545	0.105706	0.226601	0.146378	0.111122	1	0.0101223	1	FALSE	-0.0835895		-0.0835895
DENND5A	DENND5A-207	ENST00000527896.1	nonsense_mediated_decay	DENND5A	protein_coding	0.0320195	0.0493104	0.0246614	0.0322753	0.0550377	0.0862974	0.070008	1	7.31347e-06	1	FALSE	-0.035881	0.0551753	-0.134369
DENND5A	DENND5A-210	ENST00000530044.5	protein_coding	DENND5A	protein_coding	0.0565172	0	0.0744356	0	0.232813	0.141096	0.127414	1	7.31347e-06	1	FALSE	-0.134369	0.0551753	-0.134369
DENND5A	DENND5A-215	ENST00000532696.1	retained_intron	DENND5A	protein_coding	0.109823	0.0494748	0.0759778	0.0890122	0.00647306	0.0335867	0.03763	1	7.31347e-06	1	FALSE	0.0551753	0.0551753	-0.134369
DEPDC1	DEPDC1-202	ENST00000456315.7	protein_coding	DEPDC1	protein_coding	0.180319	0.11709	0.513219	0.356996	0.706693	0.82336	0.750272	1	0.00584929	0.00194352	TRUE	-0.468202	0.464673	-0.468202
DEPDC1	DEPDC1-203	ENST00000488146.5	retained_intron	DEPDC1	protein_coding	0.819681	0.88291	0.319248	0.371967	0.200643	0.0669446	0.133749	1	0.00584929	0.000709856	TRUE	0.464673	0.464673	-0.468202
DERL1	DERL1-202	ENST00000405944.7	protein_coding	DERL1	protein_coding	0	0	0	0	0.128395	0.126574	0.0120453	1	0.0217238	1	FALSE	-0.0890048		-0.0890048
DERL1	DERL1-206	ENST00000524119.1	retained_intron	DERL1	protein_coding	0.135696	0.15265	0.144669	0.139402	0.185639	0.163436	0.172887	1	0.0217238	1	FALSE	-0.0308829		-0.0890048
DERL2	DERL2-201	ENST00000158771.9	protein_coding	DERL2	protein_coding	0.285973	0.367409	0.2647	0.305368	0.226047	0.18823	0.248662	1	0.0280112	1	FALSE	0.0848832	0.0848832	-0.0771705
DERL2	DERL2-204	ENST00000571968.1	processed_transcript	DERL2	protein_coding	0.00836316	0.0124633	0.0862825	0.0711039	0.0967948	0.129013	0.139364	1	0.0280112	1	FALSE	-0.0771705	0.0848832	-0.0771705
DERL2	DERL2-208	ENST00000573637.5	nonsense_mediated_decay	DERL2	protein_coding	0.0204296	0.018388	0.00984382	0.0300087	0.0883367	0.0650126	0.069415	1	0.0280112	1	FALSE	-0.0545872	0.0848832	-0.0771705
DERL2	DERL2-209	ENST00000574700.5	retained_intron	DERL2	protein_coding	0.11495	0.0624935	0.0697615	0.105972	0.0537765	0.0329209	0.0567833	1	0.0280112	1	FALSE	0.0404673	0.0848832	-0.0771705
DEUP1	DEUP1-201	ENST00000298050.8	protein_coding	DEUP1	protein_coding	0	0	0.126122	0	0.263273	0.405752	0.301683	1	0.00365052	0.13569	FALSE	-0.292039		-0.292039
DGLUCY	DGLUCY-211	ENST00000518868.5	protein_coding	DGLUCY	protein_coding	0.0596305	0.0634193	0.0700148	0.0500432	0.0767529	0.107942	0.0804714	1	0.0148353	1	FALSE	-0.0276117		-0.060589
DGLUCY	DGLUCY-216	ENST00000520130.1	retained_intron	DGLUCY	protein_coding	0.109857	0.0988746	0.0867001	0.0612065	0.133921	0.117042	0.147575	1	0.0148353	1	FALSE	-0.0436862		-0.060589
DGLUCY	DGLUCY-221	ENST00000521334.5	protein_coding	DGLUCY	protein_coding	0.0121405	0.00657178	0.0155114	0.0171878	0.0783574	0.107062	0.0349062	1	0.0148353	1	FALSE	-0.060589		-0.060589
DHDDS	DHDDS-201	ENST00000236342.12	protein_coding	DHDDS	protein_coding	0.202421	0.251626	0.183941	0.26823	0.177243	0	0.111163	1	0.00727936	1	FALSE	0.13042	0.13042
DHRS12	DHRS12-203	ENST00000444610.7	protein_coding	DHRS12	protein_coding	0.0811298	0	0.0622759	0	0.274371	0.238335	0.14046	1	1.93622e-05	0.00121299	TRUE	-0.181871	0.186792	-0.181871
DHRS12	DHRS12-209	ENST00000497151.1	processed_transcript	DHRS12	protein_coding	0.0263243	0.245572	0.1481	0.0791717	0.262895	0.293869	0.272634	1	1.93622e-05	0.170112	FALSE	-0.151674	0.186792	-0.181871
DHRS12	DHRS12-210	ENST00000650833.1	nonsense_mediated_decay	DHRS12	protein_coding	0.256769	0.225806	0.19752	0.225164	0.0372439	0	0.0813264	1	1.93622e-05	0.00142122	TRUE	0.186792	0.186792	-0.181871
DHRS4	DHRS4-201	ENST00000313250.10	protein_coding	DHRS4	protein_coding	0.365628	0.260742	0.435155	0.27692	0.589176	0.48427	0.443895	1	0.0431124	0.882517	FALSE	-0.171169	0.162049	-0.171169
DHRS4	DHRS4-203	ENST00000397075.7	protein_coding	DHRS4	protein_coding	0.26263	0.278256	0.202052	0.347702	0	0.184109	0.147725	1	0.0431124	0.0227255	TRUE	0.162049	0.162049	-0.171169
DHRS7	DHRS7-202	ENST00000536410.6	protein_coding	DHRS7	protein_coding	0.260685	0.190652	0.0580014	0.117336	0	0	0	1	0.000919162	1	FALSE	0.156669	0.156669	-0.226274
DHRS7	DHRS7-205	ENST00000554101.5	protein_coding	DHRS7	protein_coding	0.313224	0.31243	0.426465	0.491349	0.659446	0.648626	0.528352	1	0.000919162	0.532828	FALSE	-0.226274	0.156669	-0.226274
DHX16	DHX16-203	ENST00000415603.1	protein_coding	DHX16	protein_coding	0	0	0.0304603	0	0.164895	0.0579638	0.0408917	1	0.00789785	1	FALSE	-0.0803018		-0.0803018
DIAPH2	DIAPH2-203	ENST00000373049.8	protein_coding	DIAPH2	protein_coding	0.309273	0.321315	0.238434	0.289131	0.383761	0.424299	0.344875	1	3.55417e-13	1	FALSE	-0.0947736	0.0962758	-0.0947736
DIAPH2	DIAPH2-205	ENST00000373061.7	protein_coding	DIAPH2	protein_coding	0.090159	0.0984086	0.134306	0.0622295	0	0	0	1	3.55417e-13	1	FALSE	0.0962758	0.0962758	-0.0947736
DIAPH3	DIAPH3-205	ENST00000400324.9	protein_coding	DIAPH3	protein_coding	0	0.105406	0.262039	0.329191	0.491813	0.402591	0.332461	1	1.46955e-06	0.0519545	FALSE	-0.234796	0.415792	-0.234796
DIAPH3	DIAPH3-207	ENST00000470420.1	processed_transcript	DIAPH3	protein_coding	0	0	0	0	0.0991126	0.0995941	0.144791	1	1.46955e-06	1	FALSE	-0.114499	0.415792	-0.234796
DIAPH3	DIAPH3-209	ENST00000615942.1	retained_intron	DIAPH3	protein_coding	0.733582	0.848397	0.559877	0.574085	0.253158	0.183505	0.352918	1	1.46955e-06	0.000639676	TRUE	0.415792	0.415792	-0.234796
DICER1	DICER1-201	ENST00000343455.8	protein_coding	DICER1	protein_coding	0.45396	0.521193	0.44242	0.488612	0.252429	0.207964	0.35742	1	6.39206e-09	0.00376484	TRUE	0.203942	0.203942	-0.103296
DICER1	DICER1-203	ENST00000526495.6	protein_coding	DICER1	protein_coding	0	0	0.0828161	0.0927269	0.13986	0.184942	0.116743	1	6.39206e-09	1	FALSE	-0.103296	0.203942	-0.103296
DICER1	DICER1-208	ENST00000529720.1	protein_coding	DICER1	protein_coding	0	0	0	0.0170357	0.0817146	0.0621725	0.0171586	1	6.39206e-09	1	FALSE	-0.049423	0.203942	-0.103296
DIP2C	DIP2C-202	ENST00000381496.7	protein_coding	DIP2C	protein_coding	0.0333453	0	0.189955	0.184695	0.416943	0.329323	0.135034	0	0.0162187	0.00127669	TRUE	-0.191768		-0.191768
DIXDC1	DIXDC1-205	ENST00000529225.5	protein_coding	DIXDC1	protein_coding	0.0290477	0.0364251	0.0533081	0.0745102	0.250231	0.139716	0.14155	1	0.0128775	1	FALSE	-0.128843		-0.128843
DLG4	DLG4-202	ENST00000399506.9	protein_coding	DLG4	protein_coding	0.275264	0.322129	0.285395	0.331835	0.363113	0.387052	0.354517	1	7.51173e-05	1	FALSE	-0.0645716	0.0703362	-0.0645716
DLG4	DLG4-206	ENST00000485100.5	protein_coding	DLG4	protein_coding	0.103865	0.112791	0.06341	0.0812251	0.0599603	0	0	1	7.51173e-05	1	FALSE	0.0703362	0.0703362	-0.0645716
DLGAP1-AS1	DLGAP1-AS1-201	ENST00000317114.2	lncRNA	DLGAP1-AS1	lncRNA	0.570082	0.420844	0.72989	0.551733	0.806284	0.804728	0.930838	1	0.0484184	1	FALSE	-0.279146	0.132683	-0.279146
DLGAP1-AS1	DLGAP1-AS1-205	ENST00000576606.5	lncRNA	DLGAP1-AS1	lncRNA	0.102061	0.11809	0.230472	0.172324	0	0	0.0691616	1	0.0484184	1	FALSE	0.132683	0.132683	-0.279146
DMC1	DMC1-201	ENST00000216024.7	protein_coding	DMC1	protein_coding	0.0606059	0.18186	0.221222	0	0.333301	0.397876	0.353322	1	0.00260079	0.00975893	TRUE	-0.245578	0.237224	-0.245578
DMC1	DMC1-203	ENST00000428462.6	protein_coding	DMC1	protein_coding	0.503724	0.426624	0.494907	0.651277	0.36758	0.228646	0.2495	1	0.00260079	0.388321	FALSE	0.237224	0.237224	-0.245578
DMD	DMD-204	ENST00000358062.6	protein_coding	DMD	protein_coding	0	0	0	0	0.192566	0.112678	0.0417188	1	4.20313e-05	1	FALSE	-0.115654	0.0779938	-0.115654
DMD	DMD-212	ENST00000378723.7	protein_coding	DMD	protein_coding	0.148191	0.103269	0.18782	0.117463	0	0.0998464	0.0837294	1	4.20313e-05	1	FALSE	0.0779938	0.0779938	-0.115654
DMGDH	DMGDH-203	ENST00000518477.5	nonsense_mediated_decay	DMGDH	protein_coding	0.226586	0.162671	0.103233	0.228436	0	0	0	1	0.00030606	1	FALSE	0.180232	0.180232	-0.0882627
DMGDH	DMGDH-204	ENST00000518707.1	processed_transcript	DMGDH	protein_coding	0	0.0756488	0	0	0.096986	0.0763667	0.148172	1	0.00030606	1	FALSE	-0.0882627	0.180232	-0.0882627
DMRTC1B	DMRTC1B-205	ENST00000440247.5	protein_coding	DMRTC1B	protein_coding	0	0	0	0	0.2901	0.22883	0.086951	1	0.00202267	1	FALSE	-0.20196		-0.20196
DNAH3	DNAH3-201	ENST00000261383.3	protein_coding	DNAH3	protein_coding	0.276958	0.132631	0.378631	0.281583	0.661191	0.538076	0.682545	1	0.0110251	0.00381245	TRUE	-0.35982	0.194427	-0.35982
DNAH3	DNAH3-204	ENST00000572931.1	retained_intron	DNAH3	protein_coding	0.342551	0.537348	0.285487	0.247469	0.155494	0.132472	0.188396	1	0.0110251	0.679376	FALSE	0.194427	0.194427	-0.35982
DNAI1	DNAI1-201	ENST00000242317.9	protein_coding	DNAI1	protein_coding	0.0559256	0.0248279	0.121613	0	0.172825	0.239912	0.183919	1	0.0383406	1	FALSE	-0.148294	0.297756	-0.148294
DNAI1	DNAI1-208	ENST00000488790.1	processed_transcript	DNAI1	protein_coding	0.49768	0.918849	0.614194	0.622993	0.352176	0.336411	0.408431	1	0.0383406	0.0176545	TRUE	0.297756	0.297756	-0.148294
DNAI2	DNAI2-201	ENST00000311014.11	protein_coding	DNAI2	protein_coding	0	0	0.17411	0	0.827725	0.535724		1	0.0154347	0.0552356	FALSE
DNAI2	DNAI2-203	ENST00000579055.5	nonsense_mediated_decay	DNAI2	protein_coding	1	1	0.502362	1	0.172275	0		1	0.0154347	0.0016142	TRUE
DNAJA4	DNAJA4-203	ENST00000394855.7	protein_coding	DNAJA4	protein_coding	0	0.0213778	0.0113549	0.0129057	0.0517836	0.053644	0.0429961	1	0.0116258	1	FALSE	-0.0380649	0.0520811	-0.0737552
DNAJA4	DNAJA4-206	ENST00000446172.2	protein_coding	DNAJA4	protein_coding	0.0826989	0.06102	0.081628	0.109009	0.165508	0.171617	0.134907	1	0.0116258	1	FALSE	-0.0737552	0.0520811	-0.0737552
DNAJA4	DNAJA4-207	ENST00000480425.1	retained_intron	DNAJA4	protein_coding	0.105309	0.135937	0.0696179	0.0912529	0.0495239	0.0448342	0.050986	1	0.0116258	1	FALSE	0.0520811	0.0520811	-0.0737552
DNAJA4	DNAJA4-210	ENST00000489435.2	protein_coding	DNAJA4	protein_coding	0.0590496	0.104496	0.0895967	0.1398	0.162983	0.147855	0.14585	1	0.0116258	1	FALSE	-0.0539939	0.0520811	-0.0737552
DNAJA4	DNAJA4-211	ENST00000493321.1	retained_intron	DNAJA4	protein_coding	0.0345041	0.0434842	0.0840139	0.0519531	0.0968594	0.13078	0.111724	1	0.0116258	1	FALSE	-0.0596321	0.0520811	-0.0737552
DNAJB11	DNAJB11-201	ENST00000265028.7	protein_coding	DNAJB11	protein_coding	0.620286	0.649107	0.605104	0.63819	0.750651	0.844746	0.779333	1	0.0117914	1	FALSE	-0.163405	0.115181	-0.163405
DNAJB11	DNAJB11-203	ENST00000464877.1	retained_intron	DNAJB11	protein_coding	0.236116	0.171362	0.285533	0.235749	0.163455	0.0905476	0.097024	1	0.0117914	1	FALSE	0.115181	0.115181	-0.163405
DNAJB4	DNAJB4-201	ENST00000370763.6	protein_coding	DNAJB4	protein_coding	0.433765	0.562236	0.506821	0.447823	0.270693	0.283752	0.332888	1	0.038272	0.0294664	TRUE	0.191884	0.191884
DNAJB5	DNAJB5-201	ENST00000312316.9	protein_coding	DNAJB5	protein_coding	0.742628	0.624282	0.745207	0.759158	0.772157	0.795906	0.776544	1	1.41573e-09	1	FALSE	-0.063717	0.0676618	-0.0712784
DNAJB5	DNAJB5-204	ENST00000454002.6	protein_coding	DNAJB5	protein_coding	0.0620188	0.104091	0.0771424	0.027395	0	0	0	1	1.41573e-09	1	FALSE	0.0676618	0.0676618	-0.0712784
DNAJB5	DNAJB5-206	ENST00000469798.5	nonsense_mediated_decay	DNAJB5	protein_coding	0	0	0	0	0.0688464	0.0923748	0.0526139	1	1.41573e-09	1	FALSE	-0.0712784	0.0676618	-0.0712784
DNAJB5	DNAJB5-207	ENST00000537321.5	protein_coding	DNAJB5	protein_coding	0.0673913	0.122811	0.0887931	0.067672	0.0435228	0	0.0469419	1	1.41573e-09	1	FALSE	0.0565119	0.0676618	-0.0712784
DNAJC10	DNAJC10-204	ENST00000459930.1	retained_intron	DNAJC10	protein_coding	0.0718429	0.06064	0.0729001	0.0656019	0.0456176	0.00998637	0.0342575	1	0.000273502	1	FALSE	0.0377924	0.0377924	-0.0894925
DNAJC10	DNAJC10-206	ENST00000491074.5	retained_intron	DNAJC10	protein_coding	0.2864	0.172477	0.291339	0.232393	0.29801	0.357721	0.349704	1	0.000273502	1	FALSE	-0.0894925	0.0377924	-0.0894925
DNAJC10	DNAJC10-207	ENST00000494462.1	retained_intron	DNAJC10	protein_coding	0.0409462	0.049838	0.0446532	0.0544799	0.117616	0.113353	0.130206	1	0.000273502	1	FALSE	-0.0729124	0.0377924	-0.0894925
DNAJC5G	DNAJC5G-205	ENST00000420191.5	protein_coding	DNAJC5G	protein_coding	0	0	0.154106	0	0.207737	0.0840404	0.260801	0	0.00427433	0.000837897	TRUE	-0.145666	0.108465	-0.145666
DNAJC5G	DNAJC5G-206	ENST00000460358.1	retained_intron	DNAJC5G	protein_coding	0.419085	0.311286	0.374555	0.361965	0.259474	0.264498	0.250802	1	0.00427433	1	FALSE	0.108465	0.108465	-0.145666
DNHD1	DNHD1-213	ENST00000531903.5	retained_intron	DNHD1	protein_coding	0	0.0231128	0.0263507	0.0291732	0.0769471	0.0901403	0.0504574	1	0.0103421	1	FALSE	-0.0528558	0.0355607	-0.0528558
DNHD1	DNHD1-218	ENST00000534210.6	retained_intron	DNHD1	protein_coding	0.0782727	0.0725246	0.0741984	0.0800651	0.0400647	0.0159414	0.0661074	1	0.0103421	1	FALSE	0.0355607	0.0355607	-0.0528558
DNM1P46	DNM1P46-201	ENST00000341853.5	processed_transcript	DNM1P46	transcribed_unprocessed_pseudogene	0.83158	0.862175	0.764843	0.816947	0.517755	0.628681	0.606483	1	0.00258865	0.00141007	TRUE	0.23458	0.23458	-0.108713
DNM1P46	DNM1P46-203	ENST00000425045.2	processed_transcript	DNM1P46	transcribed_unprocessed_pseudogene	0.121845	0.0872649	0.0740985	0.109101	0.247132	0.123636	0.209708	1	0.00258865	1	FALSE	-0.0954147	0.23458	-0.108713
DNM1P46	DNM1P46-204	ENST00000559110.5	processed_transcript	DNM1P46	transcribed_unprocessed_pseudogene	0.0465749	0.0505603	0.0758085	0.073952	0.187188	0.18396	0.140164	1	0.00258865	1	FALSE	-0.108713	0.23458	-0.108713
DNMT3B	DNMT3B-206	ENST00000456297.6	protein_coding	DNMT3B	protein_coding	0	0.0994995	0	0	0.163851	0.226856	0.198797	1	0.0152445	1	FALSE	-0.171627		-0.171627
DOCK4	DOCK4-209	ENST00000468571.2	retained_intron	DOCK4	protein_coding	0.133387	0.0819178	0.0928323	0.0980212	0.0604546	0.0680307	0.0704446	1	2.6713e-08	1	FALSE	0.0352297	0.0917769
DOCK4	DOCK4-210	ENST00000469898.1	retained_intron	DOCK4	protein_coding	0.122624	0.0598047	0.103171	0.10078	0	0	0.0530646	1	2.6713e-08	1	FALSE	0.0789066	0.0917769
DOCK4	DOCK4-211	ENST00000476846.5	processed_transcript	DOCK4	protein_coding	0.107498	0.0822997	0.157254	0.121897	0	0	0.0763813	1	2.6713e-08	1	FALSE	0.0917769	0.0917769
DOK3	DOK3-201	ENST00000312943.10	protein_coding	DOK3	protein_coding	0.214536	0.176567	0.217596	0.157657	0.106439	0.0610042	0.0935928	1	0.014826	1	FALSE	0.104577	0.104577
DOK5	DOK5-201	ENST00000262593.10	protein_coding	DOK5	protein_coding	0.858257	0.74052	0.754956	0.817349	0.258986	0.587396	0.371287	1	0.0122571	0.673364	FALSE	0.386881	0.386881
DONSON	DONSON-203	ENST00000417871.5	nonsense_mediated_decay	DONSON	protein_coding	0.199683	0.258266	0.125772	0.113932	0	0	0	1	0.000812997	1	FALSE	0.174414	0.174414	-0.0550901
DONSON	DONSON-206	ENST00000439593.1	nonsense_mediated_decay	DONSON	protein_coding	0	0	0.0597223	0.0307242	0.0876946	0.077203	0.0682075	1	0.000812997	1	FALSE	-0.0550901	0.174414	-0.0550901
DPAGT1	DPAGT1-202	ENST00000392834.7	nonsense_mediated_decay	DPAGT1	protein_coding	0.118013	0.127753	0.104217	0.131667	0	0	0.0850131	1	0.0148868	1	FALSE	0.0920749	0.0920749
DPH7	DPH7-203	ENST00000467243.5	processed_transcript	DPH7	protein_coding	0.121553	0.11091	0.15161	0.111406	0.286244	0.243162	0.222956	1	8.18849e-07	1	FALSE	-0.126918	0.0715892	-0.126918
DPH7	DPH7-212	ENST00000485189.5	processed_transcript	DPH7	protein_coding	0.0471425	0.0884421	0.107527	0.118574	0.0163626	0.0304846	0.00964937	1	8.18849e-07	1	FALSE	0.0715892	0.0715892	-0.126918
DPH7	DPH7-213	ENST00000491359.1	processed_transcript	DPH7	protein_coding	0.215346	0.182227	0.160547	0.161829	0.100457	0.121196	0.138643	1	8.18849e-07	1	FALSE	0.0598885	0.0715892	-0.126918
DPH7	DPH7-214	ENST00000497237.5	processed_transcript	DPH7	protein_coding	0.207277	0.192238	0.177335	0.154731	0.318142	0.282267	0.259836	1	8.18849e-07	1	FALSE	-0.103853	0.0715892	-0.126918
DPP8	DPP8-201	ENST00000300141.11	protein_coding	DPP8	protein_coding	0.303435	0.309987	0.238937	0.243895	0.164815	0.0963262	0.199647	1	0.000387471	1	FALSE	0.120467	0.120467
DPP8	DPP8-211	ENST00000559526.5	protein_coding	DPP8	protein_coding	0.0726654	0.0187689	0.0660913	0.0259989	0	0	0	1	0.000387471	1	FALSE	0.0458811	0.120467
DPP8	DPP8-212	ENST00000560048.2	processed_transcript	DPP8	protein_coding	0.0738761	0.0755905	0.0578734	0.0693047	0.0403863	0.0565128	0.0425009	1	0.000387471	1	FALSE	0.0226945	0.120467
DPY19L2P2	DPY19L2P2-204	ENST00000438364.5	processed_transcript	DPY19L2P2	transcribed_unprocessed_pseudogene	0.0203402	0	0.0615618	0.0160595	0.0856947	0.16656	0.0664956	1	0.0338217	1	FALSE	-0.0817598	0.167262	-0.0817598
DPY19L2P2	DPY19L2P2-206	ENST00000446373.1	retained_intron	DPY19L2P2	transcribed_unprocessed_pseudogene	0.669604	0.789722	0.618467	0.554402	0.465768	0.453991	0.5526	1	0.0338217	0.14742	FALSE	0.167262	0.167262	-0.0817598
DPYSL5	DPYSL5-201	ENST00000288699.11	protein_coding	DPYSL5	protein_coding	0	0	0.437368	0	0.7773	0.821955	0.41595	0	0.00156855	0.00793518	TRUE	-0.562393		-0.562393
DRG2	DRG2-207	ENST00000497744.1	retained_intron	DRG2	protein_coding	0.00973395	0	0	0.0112118	0.065104	0.0590007	0.0519345	1	0.0304912	1	FALSE	-0.0534432	0.123837	-0.0534432
DRG2	DRG2-210	ENST00000578173.5	retained_intron	DRG2	protein_coding	0.153853	0.250094	0.201415	0.22644	0.0793822	0.027387	0.145571	1	0.0304912	1	FALSE	0.123837	0.123837	-0.0534432
DSE	DSE-204	ENST00000448740.2	retained_intron	DSE	protein_coding	0.0212623	0.00454512	0.0184457	0.0337149	0.0584435	0.0825677	0.0405746	1	0.010817	1	FALSE	-0.0410366		-0.0410366
DST	DST-203	ENST00000340834.10	protein_coding	DST	protein_coding	0.0936226	0.0936091	0.0870373	0.120411	0.0559845	0.0817225	0.0736863	1	7.18212e-05	1	FALSE	0.0282056	0.0309552	-0.178316
DST	DST-214	ENST00000492944.1	retained_intron	DST	protein_coding	0.358218	0.403403	0.481071	0.442663	0.688233	0.59931	0.51142	1	7.18212e-05	1.37288e-07	TRUE	-0.178316	0.0309552	-0.178316
DST	DST-232	ENST00000524186.1	protein_coding	DST	protein_coding	0.135251	0.121012	0.117867	0.134869	0.0976145	0.100406	0.0908632	1	7.18212e-05	1	FALSE	0.0309552	0.0309552	-0.178316
DUOX1	DUOX1-203	ENST00000557893.5	retained_intron	DUOX1	protein_coding	0.157479	0.119959	0.109391	0.154505	0.210218	0.20451	0.16341	1	0.00198277	1	FALSE	-0.0573787	0.116149	-0.0587699
DUOX1	DUOX1-206	ENST00000558744.1	retained_intron	DUOX1	protein_coding	0.842521	0.880041	0.890609	0.825108	0.715295	0.774274	0.740695	1	0.00198277	1	FALSE	0.116149	0.116149	-0.0587699
DUOX1	DUOX1-209	ENST00000559221.1	processed_transcript	DUOX1	protein_coding	0	0	0	0.0203864	0.0744873	0.0212166	0.0958955	1	0.00198277	1	FALSE	-0.0587699	0.116149	-0.0587699
DUS1L	DUS1L-201	ENST00000306796.10	protein_coding	DUS1L	protein_coding	0.0491049	0	0.00957838	0.0843778	0.136216	0.152241	0.102651	1	0.00525799	1	FALSE	-0.0946043		-0.0946043
DUS1L	DUS1L-208	ENST00000578264.1	retained_intron	DUS1L	protein_coding	0.0146202	0.0161613	0.0132406	0.017639	0.040056	0.0567187	0.0527375	1	0.00525799	1	FALSE	-0.0344221		-0.0946043
DUXAP9	DUXAP9-202	ENST00000549484.5	processed_transcript	DUXAP9	transcribed_processed_pseudogene	0.0991893	0	0.0979149	0.0377909	0.245938	0.243932	0.207922	1	0.0193899	1	FALSE	-0.173874		-0.173874
DVL1	DVL1-201	ENST00000378888.10	protein_coding	DVL1	protein_coding	0.299345	0.143439	0.28354	0.236427	0.39294	0.572548	0.342693	1	0.000202523	0.14034	FALSE	-0.195373	0.217708	-0.195373
DVL1	DVL1-202	ENST00000378891.9	protein_coding	DVL1	protein_coding	0.397185	0.61186	0.521017	0.556728	0.324816	0.200977	0.386175	1	0.000202523	0.060844	FALSE	0.217708	0.217708	-0.195373
DVL1	DVL1-206	ENST00000632445.1	protein_coding	DVL1	protein_coding	0	0	0.0189998	0.0373361	0.146124	0.127082	0.0993867	1	0.000202523	1	FALSE	-0.110113	0.217708	-0.195373
DVL1	DVL1-208	ENST00000634054.1	retained_intron	DVL1	protein_coding	0.0915443	0.0882208	0.109759	0.100246	0.0621239	0.0560894	0.0592274	1	0.000202523	1	FALSE	0.0382957	0.217708	-0.195373
DYM	DYM-219	ENST00000584983.5	protein_coding	DYM	protein_coding	0.0978944	0.1478	0.17566	0.161116	0.24445	0.375572	0.27097	1	0.0038502	1	FALSE	-0.15138		-0.15138
DYNC1I2	DYNC1I2-203	ENST00000409197.5	protein_coding	DYNC1I2	protein_coding	0.528537	0.424983	0.503236	0.449798	0.243984	0.267253	0.335223	1	8.3641e-05	0.031526	TRUE	0.194485	0.194485	-0.105726
DYNC1I2	DYNC1I2-204	ENST00000409317.5	protein_coding	DYNC1I2	protein_coding	0	0	0.014978	0	0.099014	0.187301	0.0420955	1	8.3641e-05	1	FALSE	-0.105726	0.194485	-0.105726
DYNC1I2	DYNC1I2-221	ENST00000471482.5	retained_intron	DYNC1I2	protein_coding	0.118029	0.0717701	0.0955013	0.0765579	0.0480539	0.0513799	0.0635291	1	8.3641e-05	1	FALSE	0.0361436	0.194485	-0.105726
DYNC2I1	DYNC2I1-202	ENST00000407559.8	protein_coding	DYNC2I1	protein_coding	0.552577	0.471972	0.462299	0.411586	0.641095	0.641963	0.580745	1	0.0110457	1	FALSE	-0.146659	0.122934	-0.146659
DYNC2I1	DYNC2I1-205	ENST00000467220.1	retained_intron	DYNC2I1	protein_coding	0.34574	0.358538	0.4723	0.447933	0.278118	0.242923	0.328538	1	0.0110457	1	FALSE	0.122934	0.122934	-0.146659
DYNC2LI1	DYNC2LI1-201	ENST00000260605.12	protein_coding	DYNC2LI1	protein_coding	0.089293	0.160398	0.161839	0.146254	0.171691	0.329217	0.198129	1	0.0348624	1	FALSE	-0.0935664		-0.114807
DYNC2LI1	DYNC2LI1-203	ENST00000398823.6	protein_coding	DYNC2LI1	protein_coding	0.20953	0.239734	0.250779	0.305165	0.423555	0.346774	0.327999	1	0.0348624	1	FALSE	-0.114807		-0.114807
DYRK1A	DYRK1A-208	ENST00000643355.1	retained_intron	DYRK1A	protein_coding	0.084798	0.0712175	0.0805284	0.100406	0.0565573	0.0496696	0.0622022	1	0.0448189	1	FALSE	0.0280944	0.0280944
DYSF	DYSF-207	ENST00000409762.5	protein_coding	DYSF	protein_coding	0.140837	0.258297	0.420597	0.282378	0	0	0.175665	0	0.00369722	0.000329686	TRUE	0.216972	0.216972
EAF1-AS1	EAF1-AS1-208	ENST00000608408.2	lncRNA	EAF1-AS1	lncRNA	0	0	0.0244549	0	0.0837659	0.0653546	0.0503574	1	0.0339361	1	FALSE	-0.0603789		-0.0603789
EDC4	EDC4-201	ENST00000358933.10	protein_coding	EDC4	protein_coding	0.404715	0.407519	0.397362	0.417812	0.393765	0.360518	0.362131	1	0.00870056	1	FALSE	0.0347136	0.0397993	-0.0796749
EDC4	EDC4-204	ENST00000572221.5	retained_intron	EDC4	protein_coding	0.130433	0.112695	0.104213	0.154216	0.0754954	0.0844441	0.0968307	1	0.00870056	1	FALSE	0.0397993	0.0397993	-0.0796749
EDC4	EDC4-207	ENST00000573992.5	retained_intron	EDC4	protein_coding	0	0	0	0	0.0911105	0.0963499	0.0515641	1	0.00870056	1	FALSE	-0.0796749	0.0397993	-0.0796749
EDRF1	EDRF1-204	ENST00000368813.1	protein_coding	EDRF1	protein_coding	0.357256	0.378592	0.298488	0.303252	0.297116	0.277353	0.290014	1	0.00616965	1	FALSE	0.0462359	0.0462359	-0.076155
EDRF1	EDRF1-213	ENST00000530795.1	nonsense_mediated_decay	EDRF1	protein_coding	0.0579476	0.0214632	0.0620737	0.0745374	0.113257	0.139031	0.138194	1	0.00616965	1	FALSE	-0.076155	0.0462359	-0.076155
EEF1A1	EEF1A1-222	ENST00000678703.1	protein_coding	EEF1A1	protein_coding	0.427326	0.397635	0.405483	0.393184	0.195638	0	0.436488	0	0.0006553	6.40456e-06	TRUE	0.195198	0.195198
EEF2	EEF2-201	ENST00000309311.7	protein_coding	EEF2	protein_coding	0.522533	0.590848	0.611592	0.744522	1	1	0.72116	0	7.31244e-05	0	TRUE	-0.289679	0.289679	-0.289679
EEF2	EEF2-207	ENST00000600794.1	protein_coding	EEF2	protein_coding	0.477467	0.409152	0.388408	0.255478	0	0	0.27884	0	7.31244e-05	0	TRUE	0.289679	0.289679	-0.289679
EEF2K	EEF2K-201	ENST00000263026.10	protein_coding	EEF2K	protein_coding	0.752501	0.673211	0.790331	0.72295	0.951518	0.87438	0.870267	1	0.0427938	1	FALSE	-0.163973	0.0937575	-0.163973
EEF2K	EEF2K-203	ENST00000563555.1	retained_intron	EEF2K	protein_coding	0.0645495	0.188922	0.0926491	0.177866	0	0.0591591	0.0525581	1	0.0427938	1	FALSE	0.0937575	0.0937575	-0.163973
EEF2K	EEF2K-204	ENST00000568269.5	nonsense_mediated_decay	EEF2K	protein_coding	0.18295	0.137867	0.11702	0.0991843	0.0484825	0.0664608	0.0771752	1	0.0427938	1	FALSE	0.0702158	0.0937575	-0.163973
EFCAB13	EFCAB13-204	ENST00000518081.1	processed_transcript	EFCAB13	protein_coding	0.0851246	0.0952278	0.117804	0.0733572	0.0407678	0.0183794	0.0568891	1	0.0134671	1	FALSE	0.0541996	0.066233	-0.24626
EFCAB13	EFCAB13-208	ENST00000520776.5	retained_intron	EFCAB13	protein_coding	0.0383109	0.121076	0.119082	0.133458	0.370187	0.384878	0.292661	1	0.0134671	0.00299788	TRUE	-0.24626	0.066233	-0.24626
EFCAB13	EFCAB13-213	ENST00000523978.1	processed_transcript	EFCAB13	protein_coding	0.0663924	0.205809	0.0772516	0.104634	0.0378262	0.0517642	0.0522762	1	0.0134671	1	FALSE	0.066233	0.066233	-0.24626
EFCAB7	EFCAB7-203	ENST00000461039.1	processed_transcript	EFCAB7	protein_coding	0.112767	0.0798391	0.131483	0.0745126	0.193706	0.202248	0.194369	1	0.00693341	1	FALSE	-0.0971239	0.188428	-0.0971239
EFCAB7	EFCAB7-205	ENST00000493605.1	processed_transcript	EFCAB7	protein_coding	0.26187	0.335267	0.0597968	0.224594	0	0	0.095862	0	0.00693341	0.000479038	TRUE	0.188428	0.188428	-0.0971239
EFHC1	EFHC1-204	ENST00000491749.2	processed_transcript	EFHC1	protein_coding	0.434355	0.45227	0.562336	0.514816	0.165546	0.286031	0.437544	0	0.00817499	0.0227791	TRUE	0.194571	0.194571	-0.0576496
EFHC1	EFHC1-210	ENST00000635911.1	retained_intron	EFHC1	protein_coding	0.0436716	0.0558825	0	0.0702218	0.083273	0.114208	0.0835219	1	0.00817499	1	FALSE	-0.0512237	0.194571	-0.0576496
EFHC1	EFHC1-235	ENST00000637849.1	processed_transcript	EFHC1	protein_coding	0.17389	0.168101	0.125409	0.169707	0.266041	0.186134	0.198603	1	0.00817499	1	FALSE	-0.0576496	0.194571	-0.0576496
EFL1	EFL1-207	ENST00000560095.1	processed_transcript	EFL1	protein_coding	0.18293	0.468598	0.218512	0.175575	0	0	0.347968	0	0.00739048	0.0158285	TRUE	0.145414	0.145414	-0.0873415
EFL1	EFL1-210	ENST00000561389.1	nonsense_mediated_decay	EFL1	protein_coding	0	0.0293402	0	0	0.0990577	0.0671665	0.117806	1	0.00739048	1	FALSE	-0.0873415	0.145414	-0.0873415
EFTUD2	EFTUD2-211	ENST00000588374.1	nonsense_mediated_decay	EFTUD2	protein_coding	0	0	0	0	0.118602	0.0678432	0.0746577	1	2.55128e-06	1	FALSE	-0.0870343		-0.0870343
EFTUD2	EFTUD2-223	ENST00000592576.5	protein_coding	EFTUD2	protein_coding	0.0476643	0.0365493	0.0440109	0.060792	0.0917281	0.0750475	0.105616	1	2.55128e-06	1	FALSE	-0.0435432		-0.0870343
EGFEM1P	EGFEM1P-213	ENST00000511230.2	processed_transcript	EGFEM1P	transcribed_unitary_pseudogene	0	0	0.285581	0	0.355433	0.390055	0.278489	0	0.0253847	0.0427392	TRUE	-0.26993		-0.26993
EGFL7	EGFL7-201	ENST00000308874.12	protein_coding	EGFL7	protein_coding	0.139805	0.104008	0.0845802	0.0692139	0.0281191	0	0	1	1.09437e-05	1	FALSE	0.0900285	0.340273	-0.430302
EGFL7	EGFL7-202	ENST00000371698.3	protein_coding	EGFL7	protein_coding	0.16248	0.318693	0.542442	0.527117	0.842489	0.933346	0.678119	1	1.09437e-05	7.94855e-06	TRUE	-0.430302	0.340273	-0.430302
EGFL7	EGFL7-204	ENST00000406555.7	protein_coding	EGFL7	protein_coding	0.697715	0.5773	0.372977	0.403669	0.129392	0.0666539	0.321881	1	1.09437e-05	0.000720302	TRUE	0.340273	0.340273	-0.430302
EGLN1	EGLN1-205	ENST00000663780.1	retained_intron	EGLN1	protein_coding	0.15698	0.219052	0.141704	0.21896	0.0821906	0.0921448	0.0893676	1	2.80158e-05	1	FALSE	0.0962731	0.0962731
EGLN1	EGLN1-206	ENST00000667629.1	protein_coding	EGLN1	protein_coding	0.111651	0.0767854	0.115315	0.152	0	0.0700047	0	1	2.80158e-05	1	FALSE	0.0906031	0.0962731
EHBP1	EHBP1-215	ENST00000469591.1	retained_intron	EHBP1	protein_coding	0.116571	0.115252	0.137644	0.125387	0.0464619	0.0450037	0.10361	1	0.0348364	1	FALSE	0.0586882	0.0586882
EHMT2	EHMT2-203	ENST00000375537.8	protein_coding	EHMT2	protein_coding	0.184533	0.161631	0.159845	0.156811	0	0.0720098	0.129283	1	0.00435985	1	FALSE	0.0986075	0.0986075	-0.0684153
EHMT2	EHMT2-211	ENST00000480912.5	processed_transcript	EHMT2	protein_coding	0.0535104	0.0770422	0.0551811	0.0742606	0.103516	0.0924979	0.0931692	1	0.00435985	1	FALSE	-0.0313957	0.0986075	-0.0684153
EHMT2	EHMT2-212	ENST00000494816.5	retained_intron	EHMT2	protein_coding	0.357635	0.357018	0.367269	0.356594	0.439677	0.44086	0.403595	1	0.00435985	1	FALSE	-0.0684153	0.0986075	-0.0684153
EIF2B4	EIF2B4-201	ENST00000347454.9	protein_coding	EIF2B4	protein_coding	0.280376	0.293241	0.256041	0.264711	0.299289	0.350415	0.326229	1	0.0348534	1	FALSE	-0.0517183		-0.0517183
EIF2B5	EIF2B5-226	ENST00000648915.2	protein_coding	EIF2B5	protein_coding	0.0870749	0.326239	0.222817	0.149417	0	0.273735	0	0	0.00069269	0.000713139	TRUE	0.105142	0.105142
EIF3F	EIF3F-201	ENST00000528653.2	retained_intron	EIF3F	protein_coding	0.185604	0.172828	0.169346	0.125811	0.108385	0.064743	0.103542	1	0.0273036	1	FALSE	0.071174	0.071174	-0.0570118
EIF3F	EIF3F-205	ENST00000531572.2	protein_coding	EIF3F	protein_coding	0.0655161	0.126923	0.0814555	0.0992657	0.127085	0.175027	0.148794	1	0.0273036	1	FALSE	-0.0570118	0.071174	-0.0570118
EIF3L	EIF3L-214	ENST00000624234.3	protein_coding	EIF3L	protein_coding	0.150732	0.503626	0.169853	0.174323	0	0	0.27748	0	0.0121204	0.000836467	TRUE	0.15714	0.15714
EIF3M	EIF3M-209	ENST00000531186.5	retained_intron	EIF3M	protein_coding	0.242585	0.254803	0.180877	0.165738	0.126687	0.118311	0.132607	1	6.48824e-06	1	FALSE	0.0851325	0.091076
EIF3M	EIF3M-212	ENST00000532444.5	nonsense_mediated_decay	EIF3M	protein_coding	0.124422	0.128089	0.10251	0.0697762	0	0	0.0453696	1	6.48824e-06	1	FALSE	0.091076	0.091076
EIF4B	EIF4B-205	ENST00000549481.5	protein_coding	EIF4B	protein_coding	0.165561	0.121744	0.142835	0.102432	0.0222	0	0.0957109	1	0.0233625	1	FALSE	0.0938393	0.0938393
EIF4G1	EIF4G1-202	ENST00000346169.7	protein_coding	EIF4G1	protein_coding	0.308177	0.189645	0.261859	0.186589	0.124055	0.0772992	0.123587	1	2.31057e-06	1	FALSE	0.128254	0.128254	-0.161875
EIF4G1	EIF4G1-221	ENST00000441154.5	protein_coding	EIF4G1	protein_coding	0	0	0	0.061489	0.219822	0.245163	0.0667566	1	2.31057e-06	1.47117e-09	TRUE	-0.161875	0.128254	-0.161875
EIF4G1	EIF4G1-239	ENST00000676206.1	nonsense_mediated_decay	EIF4G1	protein_coding	0.0871545	0.0840141	0.0645794	0.0784438	0.0633939	0.0456094	0.0591283	1	2.31057e-06	1	FALSE	0.0225041	0.128254	-0.161875
EIF4H	EIF4H-202	ENST00000353999.6	protein_coding	EIF4H	protein_coding	0.724186	0.799494	0.730156	0.71463	0.633015	0.629182	0.690143	1	0.026265	1	FALSE	0.0913366	0.0913366	-0.0532734
EIF4H	EIF4H-209	ENST00000678341.1	protein_coding	EIF4H	protein_coding	0.0214746	0.0173296	0.0214652	0.0130624	0.0950773	0.0887578	0.030984	1	0.026265	1	FALSE	-0.0532734	0.0913366	-0.0532734
ELAPOR1	ELAPOR1-212	ENST00000533147.5	protein_coding	ELAPOR1	protein_coding	0.181435	0.152398	0.16373	0.126886	0.0501853	0.0761974	0	1	0.0497948	1	FALSE	0.113985	0.113985
ELAVL4	ELAVL4-215	ENST00000651693.1	nonsense_mediated_decay	ELAVL4	protein_coding	0	0	0	0	0.113676	0.113653	0.134739	1	0.0154325	1	FALSE	-0.120689		-0.306866
ELAVL4	ELAVL4-219	ENST00000652693.1	protein_coding	ELAVL4	protein_coding	0	0	0.0666792	0.0777638	0.496017	0.197493	0.335421	1	0.0154325	1	FALSE	-0.306866		-0.306866
ELK4	ELK4-203	ENST00000468523.2	protein_coding	ELK4	protein_coding	0.345598	0.117858	0.163042	0.253165	0.362393	0	0	0	0.010817	0.00203562	TRUE	0.0991182	0.0991182
ELMO2	ELMO2-206	ENST00000450812.5	protein_coding	ELMO2	protein_coding	0.144557	0.115532	0.119905	0.059121	0.0403825	0	0.0264347	1	0.00646147	1	FALSE	0.0875063	0.0875063
ELP2	ELP2-207	ENST00000535488.5	retained_intron	ELP2	protein_coding	0.146349	0.129595	0.174076	0.133985	0.0366086	0.0705309	0.121495	1	4.03311e-05	1	FALSE	0.0697899	0.0697899	-0.11123
ELP2	ELP2-223	ENST00000543439.5	processed_transcript	ELP2	protein_coding	0.0440063	0	0	0	0.109028	0.178369	0.0792972	1	4.03311e-05	1	FALSE	-0.11123	0.0697899	-0.11123
EMC10	EMC10-206	ENST00000598585.1	protein_coding	EMC10	protein_coding	0.268228	0.229947	0.198463	0.306572	0.128328	0	0.272503	0	0.04092	0.0200974	TRUE	0.117192	0.117192
EML1	EML1-203	ENST00000334192.8	protein_coding	EML1	protein_coding	0	0	0.0191726	0	0.166235	0.147495	0.100898	1	0.0144791	1	FALSE	-0.133416		-0.133416
EML2	EML2-201	ENST00000245925.8	protein_coding	EML2	protein_coding	0.259241	0.252327	0.28431	0.274179	0.193294	0.112331	0.115886	1	0.0242884	1	FALSE	0.127011	0.127011	-0.14241
EML2	EML2-202	ENST00000399594.7	nonsense_mediated_decay	EML2	protein_coding	0.218147	0.190377	0.224972	0.196479	0.363935	0.358043	0.327733	1	0.0242884	1	FALSE	-0.14241	0.127011	-0.14241
EML2	EML2-212	ENST00000588000.5	retained_intron	EML2	protein_coding	0.0680988	0.0700963	0.0725171	0.0798747	0.00812425	0.0501004	0.0648481	1	0.0242884	1	FALSE	0.0316225	0.127011	-0.14241
EML2	EML2-216	ENST00000588420.1	retained_intron	EML2	protein_coding	0.0814399	0.108999	0.112453	0.101652	0.205403	0.182072	0.149966	1	0.0242884	1	FALSE	-0.0780115	0.127011	-0.14241
EML4	EML4-201	ENST00000318522.10	protein_coding	EML4	protein_coding	0.290133	0.248269	0.283459	0.237934	0.192725	0.172556	0.185742	1	0.0452476	1	FALSE	0.0812741	0.0812741	-0.117501
EML4	EML4-203	ENST00000402711.6	protein_coding	EML4	protein_coding	0.10961	0.128086	0.168935	0.185546	0.258534	0.314359	0.223742	1	0.0452476	1	FALSE	-0.117501	0.0812741	-0.117501
ENAH	ENAH-202	ENST00000358675.6	retained_intron	ENAH	protein_coding	0.25534	0.272703	0.247676	0.247498	0.110543	0.156847	0.24222	1	0.0211816	1	FALSE	0.0859341	0.0859341	-0.0652296
ENAH	ENAH-204	ENST00000366844.7	protein_coding	ENAH	protein_coding	0.218285	0.176041	0.199096	0.220179	0.280256	0.29893	0.226704	1	0.0211816	1	FALSE	-0.0652296	0.0859341	-0.0652296
ENAH	ENAH-209	ENST00000635051.1	protein_coding	ENAH	protein_coding	0.0939137	0.0721945	0.0854784	0.104623	0.15483	0.156942	0.142265	1	0.0211816	1	FALSE	-0.0622934	0.0859341	-0.0652296
ENDOV	ENDOV-209	ENST00000519331.1	protein_coding	ENDOV	protein_coding	0.0526223	0.0102971	0.043374	0.0366518	0.0847316	0.0790595	0.0723093	1	0.0384276	1	FALSE	-0.0429638	0.0978171	-0.0429638
ENDOV	ENDOV-215	ENST00000520537.1	retained_intron	ENDOV	protein_coding	0.388685	0.316529	0.368498	0.299584	0.236721	0.219571	0.280228	1	0.0384276	1	FALSE	0.0978171	0.0978171	-0.0429638
ENOPH1	ENOPH1-203	ENST00000509635.5	protein_coding	ENOPH1	protein_coding	0.120198	0.113608	0.182725	0.354369	0.127465	0.043559	0	0	0.0336598	0.0410481	TRUE	0.135717	0.135717
ENOX1	ENOX1-201	ENST00000261488.10	protein_coding	ENOX1	protein_coding	0.627731	0.506572	0.559231	0.743476	1	0.810797	1	1	0.000407725	0	TRUE	-0.32768	0.32768	-0.32768
ENOX1	ENOX1-202	ENST00000482207.1	processed_transcript	ENOX1	protein_coding	0.372269	0.493428	0.440769	0.256524	0	0.189203	0	1	0.000407725	0	TRUE	0.32768	0.32768	-0.32768
ENTPD5	ENTPD5-201	ENST00000334696.11	protein_coding	ENTPD5	protein_coding	0.470787	0.391331	0.384504	0.38693	0.283629	0.302773	0.352726	1	0.0287611	1	FALSE	0.0953455	0.0953455	-0.0910927
ENTPD5	ENTPD5-202	ENST00000553284.5	protein_coding	ENTPD5	protein_coding	0.0207972	0.0393353	0.0819117	0.0510531	0.131504	0.175286	0.111312	1	0.0287611	1	FALSE	-0.0910927	0.0953455	-0.0910927
ENTPD5	ENTPD5-205	ENST00000556108.5	processed_transcript	ENTPD5	protein_coding	0.140371	0.137987	0.088301	0.128814	0.158076	0.169101	0.169919	1	0.0287611	1	FALSE	-0.0418304	0.0953455	-0.0910927
ENTPD5	ENTPD5-208	ENST00000557681.1	retained_intron	ENTPD5	protein_coding	0.125209	0.148387	0.129722	0.122915	0.115869	0.0666317	0.101115	1	0.0287611	1	FALSE	0.0370199	0.0953455	-0.0910927
ENY2	ENY2-202	ENST00000517311.5	nonsense_mediated_decay	ENY2	protein_coding	0.0361795	0.0160541	0.00854417	0.00739307	0.0696841	0.0823235	0.0442625	1	9.51401e-12	1	FALSE	-0.0483806	0.091091	-0.0483806
ENY2	ENY2-211	ENST00000521688.6	protein_coding	ENY2	protein_coding	0.0681055	0.061644	0.0607688	0.0792164	0	0	0.0417605	1	9.51401e-12	1	FALSE	0.0535135	0.091091	-0.0483806
ENY2	ENY2-212	ENST00000522407.5	processed_transcript	ENY2	protein_coding	0.108013	0.0813128	0.11618	0.0588578	0	0	0	1	9.51401e-12	1	FALSE	0.091091	0.091091	-0.0483806
EOGT	EOGT-208	ENST00000540764.5	protein_coding	EOGT	protein_coding	0	0	0	0.0752371	0.191286	0.109231	0.104586	1	0.0361014	1	FALSE	-0.116225		-0.116225
EPB41	EPB41-201	ENST00000343067.9	protein_coding	EPB41	protein_coding	0	0	0	0	0.0546003	0.0857841	0.0622041	1	0.000533112	1	FALSE	-0.0675295		-0.0675295
EPB41L2	EPB41L2-204	ENST00000392427.7	protein_coding	EPB41L2	protein_coding	0	0	0.0189341	0.0131766	0.0955972	0.0927856	0.0519766	1	1.03525e-10	1	FALSE	-0.0720922	0.069745	-0.0720922
EPB41L2	EPB41L2-231	ENST00000534166.1	retained_intron	EPB41L2	protein_coding	0.176745	0.154718	0.174935	0.161008	0.0875584	0.0603783	0.143383	1	1.03525e-10	1	FALSE	0.069745	0.069745	-0.0720922
EPM2A	EPM2A-201	ENST00000367519.9	protein_coding	EPM2A	protein_coding	0.176389	0.209278	0.144181	0.11807	0	0	0.0685841	1	0.0391248	1	FALSE	0.139118	0.139118
EPS15L1	EPS15L1-202	ENST00000455140.7	protein_coding	EPS15L1	protein_coding	0.101165	0.175696	0.094066	0.179333	0.0721103	0.0406766	0.0775767	1	0.00326203	1	FALSE	0.0741104	0.0741104
EPS8	EPS8-201	ENST00000281172.10	protein_coding	EPS8	protein_coding	0	0.274413	0	0.195578	0.270701	0.191887	0.325569	0	0.0182594	0.00241579	TRUE	-0.145221		-0.145221
ERBB2	ERBB2-201	ENST00000269571.10	protein_coding	ERBB2	protein_coding	0.283298	0.210961	0.165451	0	0	0.0159631	0	0	8.63576e-07	0.00989428	TRUE	0.159606	0.159606	-0.172089
ERBB2	ERBB2-202	ENST00000406381.6	protein_coding	ERBB2	protein_coding	0	0	0	0.0701419	0.230753	0.192527	0.145592	1	8.63576e-07	1	FALSE	-0.172089	0.159606	-0.172089
ERBB2	ERBB2-216	ENST00000584014.5	retained_intron	ERBB2	protein_coding	0.0390121	0.0278264	0.0887064	0.072101	0.166891	0.153673	0.14062	1	8.63576e-07	1	FALSE	-0.0968165	0.159606	-0.172089
ERBB2	ERBB2-219	ENST00000584601.5	protein_coding	ERBB2	protein_coding	0.0283063	0.0235233	0.0383685	0.0654406	0.138834	0.0813272	0.0789153	1	8.63576e-07	1	FALSE	-0.0607824	0.159606	-0.172089
ERBIN	ERBIN-205	ENST00000416865.6	protein_coding	ERBIN	protein_coding	0.044861	0.0802374	0.0613424	0.0537142	0.0292974	0	0.0195814	1	7.75436e-05	1	FALSE	0.0437458	0.0437458	-0.0921447
ERBIN	ERBIN-207	ENST00000505822.1	retained_intron	ERBIN	protein_coding	0.0384998	0.0574175	0.0531107	0.0371735	0.010453	0	0.0335451	1	7.75436e-05	1	FALSE	0.0318844	0.0437458	-0.0921447
ERBIN	ERBIN-211	ENST00000507490.1	processed_transcript	ERBIN	protein_coding	0.150982	0	0.154213	0.073161	0.184905	0.214955	0.160341	1	7.75436e-05	1	FALSE	-0.0921447	0.0437458	-0.0921447
ERBIN	ERBIN-216	ENST00000512354.1	protein_coding	ERBIN	protein_coding	0.0196456	0	0	0	0.0702688	0.0431595	0.096542	1	7.75436e-05	1	FALSE	-0.0650787	0.0437458	-0.0921447
ERC1	ERC1-204	ENST00000397203.6	protein_coding	ERC1	protein_coding	0	0	0	0	0.104613	0.0394354	0.0735477	1	3.98806e-08	1	FALSE	-0.072532		-0.072532
ERCC2	ERCC2-202	ENST00000391942.6	retained_intron	ERCC2	protein_coding	0.288342	0.334453	0.261352	0.304572	0.192806	0.19532	0.220338	1	0.000143341	1	FALSE	0.0943582	0.0943582	-0.0552511
ERCC2	ERCC2-207	ENST00000586441.1	retained_intron	ERCC2	protein_coding	0	0	0	0	0.0349899	0.0703947	0.0603688	1	0.000143341	1	FALSE	-0.0552511	0.0943582	-0.0552511
ERCC2	ERCC2-211	ENST00000588652.5	retained_intron	ERCC2	protein_coding	0.171659	0.118827	0.148517	0.179645	0.179661	0.207629	0.199124	1	0.000143341	1	FALSE	-0.0408091	0.0943582	-0.0552511
ERCC6L2	ERCC6L2-201	ENST00000288985.12	protein_coding	ERCC6L2	protein_coding	0.121812	0.129129	0.132758	0.124432	0.165573	0.170949	0.184046	1	0.0372522	1	FALSE	-0.0464901	0.0555633	-0.0464901
ERCC6L2	ERCC6L2-202	ENST00000402838.3	protein_coding	ERCC6L2	protein_coding	0.153853	0.0756192	0.104175	0.075157	0.0299455	0.0529525	0.0570152	1	0.0372522	1	FALSE	0.0555633	0.0555633	-0.0464901
ERCC6L2	ERCC6L2-205	ENST00000466840.5	processed_transcript	ERCC6L2	protein_coding	0.0393744	0.0326998	0.0437218	0.0433612	0.0513809	0.0620065	0.0458538	1	0.0372522	1	FALSE	-0.0132911	0.0555633	-0.0464901
ERCC6L2	ERCC6L2-206	ENST00000479391.6	nonsense_mediated_decay	ERCC6L2	protein_coding	0.0782834	0.0993999	0.111117	0.0952592	0.130062	0.144376	0.114189	1	0.0372522	1	FALSE	-0.0335274	0.0555633	-0.0464901
ERG	ERG-207	ENST00000398919.6	protein_coding	ERG	protein_coding	0	0	0.0472089	0	0.175345	0.194845	0.0485049	1	0.000221204	1	FALSE	-0.127763	0.232873	-0.127763
ERG	ERG-216	ENST00000492833.5	processed_transcript	ERG	protein_coding	0.355135	0.203777	0.303615	0.29654	0	0	0.170683	1	0.000221204	0.0238436	TRUE	0.232873	0.232873	-0.127763
ERI2	ERI2-201	ENST00000300005.7	protein_coding	ERI2	protein_coding	0.0271794	0.0212452	0.0492624	0.0272383	0.0688784	0.0588911	0.0739406	1	0.0364234	1	FALSE	-0.0360054	0.0511725	-0.0634747
ERI2	ERI2-206	ENST00000563117.5	protein_coding	ERI2	protein_coding	0.00450566	0.0136861	0.00889358	0	0.066097	0.102077	0.0425642	1	0.0364234	1	FALSE	-0.0634747	0.0511725	-0.0634747
ERI2	ERI2-208	ENST00000564349.5	protein_coding	ERI2	protein_coding	0.0907563	0.106612	0.0833855	0.137368	0.0682237	0.0424187	0.0494319	1	0.0364234	1	FALSE	0.0511725	0.0511725	-0.0634747
ERVK-28	ERVK-28-203	ENST00000600419.5	lncRNA	ERVK-28	lncRNA	0		0	0	0.426381	0.18401	0.680851	1	0.0465658	1	FALSE
ESCO2	ESCO2-201	ENST00000305188.13	protein_coding	ESCO2	protein_coding	0.138258	0.0625023	0.305947	0.225363	0.465661	0.499031	0.459826	1	0.00573052	0.00379501	TRUE	-0.291822	0.350447	-0.291822
ESCO2	ESCO2-208	ENST00000524293.1	retained_intron	ESCO2	protein_coding	0.835375	0.885598	0.586238	0.748226	0.412634	0.366836	0.460768	1	0.00573052	0.000539013	TRUE	0.350447	0.350447	-0.291822
ESD	ESD-202	ENST00000378720.8	protein_coding	ESD	protein_coding	0.911042	0.928288	0.874204	0.907199	0.665946	0.821265	0.827971	1	0.00347107	1	FALSE	0.133456	0.133456	-0.134385
ESD	ESD-205	ENST00000495654.1	processed_transcript	ESD	protein_coding	0.0394567	0.0284626	0.045222	0.0183749	0.263569	0.124391	0.113831	1	0.00347107	1	FALSE	-0.134385	0.133456	-0.134385
ESPNL	ESPNL-203	ENST00000409506.1	protein_coding	ESPNL	protein_coding	1	0.908035	0	0.813112	0	0	0.62789	0	0.0307375	0.0464777	TRUE	0.47099	0.47099
ESRRAP2	ESRRAP2-203	ENST00000453309.3	processed_transcript	ESRRAP2	transcribed_processed_pseudogene	0	0	0	0.0476158	0.211891	0.14102	0.147472	1	0.0468677	1	FALSE	-0.15489		-0.15489
ETFA	ETFA-203	ENST00000557943.6	protein_coding	ETFA	protein_coding	0.0547633	0.0770952	0.0790805	0.0920884	0.133418	0.183013	0.123241	1	1.67983e-05	1	FALSE	-0.0708006	0.0845061	-0.0708006
ETFA	ETFA-206	ENST00000559075.5	retained_intron	ETFA	protein_coding	0.142086	0.158342	0.144645	0.167561	0.233192	0.221378	0.209065	1	1.67983e-05	1	FALSE	-0.068053	0.0845061	-0.0708006
ETFA	ETFA-215	ENST00000560595.5	protein_coding	ETFA	protein_coding	0.0834247	0.0863468	0.090442	0.0867332	0	0.00669171	0	1	1.67983e-05	1	FALSE	0.0845061	0.0845061	-0.0708006
ETHE1	ETHE1-204	ENST00000598330.1	nonsense_mediated_decay	ETHE1	protein_coding	0.340855	0.232757	0.2568	0.432825	0.19097	0.137819	0	1	0.0355372	0.158244	FALSE	0.206213	0.206213
ETS1	ETS1-205	ENST00000527676.2	processed_transcript	ETS1	protein_coding	0.584682	0.438596	0.55205	0.604496	0.767604	0.824095	0.593651	0	0.000273604	0.0015836	TRUE	-0.183494	0.0482776	-0.183494
ETS1	ETS1-206	ENST00000530924.2	retained_intron	ETS1	protein_coding	0.0489324	0.0605928	0.0785618	0.0241943	0	0	0.0143781	1	0.000273604	1	FALSE	0.0482776	0.0482776	-0.183494
EXD1	EXD1-202	ENST00000458580.6	protein_coding	EXD1	protein_coding	0	0	0	0.0212354	0.105899	0.182903	0.063838	1	9.62204e-07	1	FALSE	-0.112238	0.284042	-0.112238
EXD1	EXD1-204	ENST00000558881.1	retained_intron	EXD1	protein_coding	0.962384	0.97817	0.753343	0.897406	0.633987	0.488803	0.718561	1	9.62204e-07	0.000300349	TRUE	0.284042	0.284042	-0.112238
EXD1	EXD1-205	ENST00000559743.1	processed_transcript	EXD1	protein_coding	0	0	0	0	0.0678055	0.0885777	0.0501665	1	9.62204e-07	1	FALSE	-0.0688499	0.284042	-0.112238
EXD2	EXD2-206	ENST00000409949.5	protein_coding	EXD2	protein_coding	0.0783739	0	0	0	0.234989	0.156792	0.0938533	1	0.0124119	1	FALSE	-0.142285		-0.142285
EXO1	EXO1-202	ENST00000366548.8	protein_coding	EXO1	protein_coding	0	0	0.171247	0.180679	0.437385	0.286197	0.223781	1	0.045377	1	FALSE	-0.227806		-0.227806
EXOC5	EXOC5-201	ENST00000340918.11	protein_coding	EXOC5	protein_coding	0	0.105698	0.106985	0.0732872	0.220499	0.244611	0.134958	1	0.0239587	1	FALSE	-0.12853		-0.12853
EXOSC9	EXOSC9-205	ENST00000506201.1	retained_intron	EXOSC9	protein_coding	0.216454	0.103835	0.110003	0.130301	0.0157501	0.0540784	0.057179	1	0.0024337	1	FALSE	0.0978123	0.0978123	-0.332823
EXOSC9	EXOSC9-208	ENST00000509980.5	processed_transcript	EXOSC9	protein_coding	0	0	0.369726	0.181476	0.540507	0.442168	0.429196	1	0.0024337	6.28125e-05	TRUE	-0.332823	0.0978123	-0.332823
EXOSC9	EXOSC9-212	ENST00000513654.5	nonsense_mediated_decay	EXOSC9	protein_coding	0.220195	0.153503	0.201835	0.181098	0.0763179	0.108408	0.1466	1	0.0024337	1	FALSE	0.0787157	0.0978123	-0.332823
EXTL2	EXTL2-201	ENST00000370113.7	protein_coding	EXTL2	protein_coding	0.13793	0.120861	0.174845	0.171587	0	0	0.114808	1	0.00326328	1	FALSE	0.113037	0.113037
EXTL2	EXTL2-202	ENST00000370114.8	protein_coding	EXTL2	protein_coding	0.355496	0.454021	0.297221	0.353102	0.291464	0.265935	0.19864	1	0.00326328	1	FALSE	0.112947	0.113037
EXTL3	EXTL3-206	ENST00000519886.5	processed_transcript	EXTL3	protein_coding	0.0688501	0.0740618	0.034623	0.0563047	0	0	0.028425	1	0.0249619	1	FALSE	0.0489849	0.0489849	-0.0102671
EXTL3	EXTL3-214	ENST00000523271.1	retained_intron	EXTL3	protein_coding	0.050331	0.0561026	0.0584813	0.0599785	0.0633797	0.075229	0.0608628	1	0.0249619	1	FALSE	-0.0102671	0.0489849	-0.0102671
EXTL3-AS1	EXTL3-AS1-201	ENST00000501224.3	lncRNA	EXTL3-AS1	lncRNA	0.0288288	0.0500498	0.0170038	0.0372425	0.0762475	0.108384	0.0744719	1	0.0471553	1	FALSE	-0.0530866	0.136954	-0.0530866
EXTL3-AS1	EXTL3-AS1-203	ENST00000520023.1	lncRNA	EXTL3-AS1	lncRNA	0.687399	0.593951	0.58972	0.615387	0.475703	0.397919	0.580359	1	0.0471553	1	FALSE	0.136954	0.136954	-0.0530866
FADS2	FADS2-204	ENST00000517312.5	protein_coding	FADS2	protein_coding	0	0.0511994	0	0.0876577	0.379581	0.257211	0.0523007	0	0.000984131	3.66321e-06	TRUE	-0.194983		-0.194983
FAF1	FAF1-201	ENST00000371778.5	protein_coding	FAF1	protein_coding	0.0882082	0.0717997	0.0463628	0.162314	0.328269	0.251716	0.205179	1	2.82687e-05	2.65233e-05	TRUE	-0.16955	0.141665	-0.16955
FAF1	FAF1-202	ENST00000396153.7	protein_coding	FAF1	protein_coding	0.302551	0.322668	0.288686	0.341526	0.269908	0.233316	0.266029	1	2.82687e-05	1	FALSE	0.0574401	0.141665	-0.16955
FAF1	FAF1-203	ENST00000472808.1	processed_transcript	FAF1	protein_coding	0.112696	0.0865236	0.0546826	0.0646547	0.121781	0.204731	0.131932	1	2.82687e-05	1	FALSE	-0.0731755	0.141665	-0.16955
FAF1	FAF1-204	ENST00000487898.1	processed_transcript	FAF1	protein_coding	0.402404	0.380965	0.495778	0.313849	0.232443	0.224623	0.312683	1	2.82687e-05	1	FALSE	0.141665	0.141665	-0.16955
FAF1	FAF1-205	ENST00000494400.5	nonsense_mediated_decay	FAF1	protein_coding	0.09414	0.138044	0.114491	0.117657	0.0475989	0.0856136	0.0841762	1	2.82687e-05	1	FALSE	0.0436202	0.141665	-0.16955
FAM106A	FAM106A-201	ENST00000392176.3	lncRNA	FAM106A	lncRNA	0.0911715	0.114687	0.0978129	0.114838	0.153185	0.148137	0.128877	1	0.0135663	1	FALSE	-0.0387723	0.0655843	-0.0660792
FAM106A	FAM106A-202	ENST00000420856.6	retained_intron	FAM106A	lncRNA	0.125793	0.166841	0.142603	0.138677	0.0900694	0.0904854	0.112254	1	0.0135663	1	FALSE	0.0458758	0.0655843	-0.0660792
FAM106A	FAM106A-205	ENST00000578409.5	lncRNA	FAM106A	lncRNA	0.0151016	0.0368326	0.0369958	0.0542485	0.0776845	0.059095	0.0597176	1	0.0135663	1	FALSE	-0.0297044	0.0655843	-0.0660792
FAM106A	FAM106A-215	ENST00000609578.1	retained_intron	FAM106A	lncRNA	0.34126	0.287427	0.372502	0.361266	0.392062	0.439651	0.388366	1	0.0135663	1	FALSE	-0.0660792	0.0655843	-0.0660792
FAM106A	FAM106A-220	ENST00000610155.5	lncRNA	FAM106A	lncRNA	0.190062	0.218003	0.198365	0.162841	0.0888854	0.128688	0.162627	1	0.0135663	1	FALSE	0.0655843	0.0655843	-0.0660792
FAM107B	FAM107B-206	ENST00000378470.5	protein_coding	FAM107B	protein_coding	0.349692	0.211283	0.267993	0.288581	0.48714	0.457057	0.413753	1	0.0380022	1	FALSE	-0.173263	0.0820076	-0.173263
FAM107B	FAM107B-229	ENST00000622567.4	protein_coding	FAM107B	protein_coding	0.139796	0.126028	0.191526	0.122264	0	0.0835009	0.105187	1	0.0380022	1	FALSE	0.0820076	0.0820076	-0.173263
FAM120AOS	FAM120AOS-206	ENST00000476484.5	nonsense_mediated_decay	FAM120AOS	protein_coding	0.150653	0.14141	0.169096	0.161366	0.112876	0.040602	0.108096	1	0.0174679	1	FALSE	0.0684402	0.0684402
FAM135A	FAM135A-202	ENST00000361499.7	protein_coding	FAM135A	protein_coding	0.0652933	0.0734538	0.121327	0.133917	0	0.0337002	0	1	2.6713e-08	1	FALSE	0.0872645	0.0872645	-0.0601612
FAM135A	FAM135A-215	ENST00000515280.5	protein_coding	FAM135A	protein_coding	0.00944767	0	0.00891407	0.0301007	0.0866444	0.0453354	0.0848507	1	2.6713e-08	1	FALSE	-0.0601612	0.0872645	-0.0601612
FAM169A	FAM169A-204	ENST00000510609.5	nonsense_mediated_decay	FAM169A	protein_coding	0	0.0412537	0.0455636	0	0.164	0.156904	0.123024	1	8.12216e-05	1	FALSE	-0.126272		-0.126272
FAM174A	FAM174A-201	ENST00000312637.5	protein_coding	FAM174A	protein_coding	1	1	1	0.975394	0.892657	0.788191	0.93959	1	0.0224583	0	TRUE	0.120369	0.120369	-0.120369
FAM174A	FAM174A-202	ENST00000505792.1	processed_transcript	FAM174A	protein_coding	0	0	0	0.0246059	0.107343	0.211809	0.0604103	1	0.0224583	0	TRUE	-0.120369	0.120369	-0.120369
FAM182A	FAM182A-201	ENST00000376398.6	lncRNA	FAM182A	lncRNA	0.120956	0.089708	0.126992	0.10694	0.0578205	0.0878321	0.0872091	1	1.82921e-10	1	FALSE	0.0335286	0.453638	-0.162243
FAM182A	FAM182A-202	ENST00000389261.4	lncRNA	FAM182A	lncRNA	0	0	0	0	0.103628	0.105351	0.0945259	1	1.82921e-10	1	FALSE	-0.101168	0.453638	-0.162243
FAM182A	FAM182A-208	ENST00000653942.1	lncRNA	FAM182A	lncRNA	0.153544	0.0583286	0.0811213	0	0.242623	0.248845	0.215007	1	1.82921e-10	1	FALSE	-0.162243	0.453638	-0.162243
FAM182A	FAM182A-214	ENST00000667322.1	lncRNA	FAM182A	lncRNA	0.662847	0.623324	0.534473	0.540481	0.133363	0.0733401	0.203227	1	1.82921e-10	1.36491e-09	TRUE	0.453638	0.453638	-0.162243
FAM182A	FAM182A-215	ENST00000667959.1	lncRNA	FAM182A	lncRNA	0	0	0	0	0.0829925	0.0399982	0.0788578	1	1.82921e-10	1	FALSE	-0.0672828	0.453638	-0.162243
FAM186B	FAM186B-202	ENST00000532262.5	protein_coding	FAM186B	protein_coding	0	0	0	0	0.0851697	0.114349	0.20428	1	0.0304912	1	FALSE	-0.1346		-0.1346
FAM193A	FAM193A-206	ENST00000506904.1	retained_intron	FAM193A	protein_coding	0.103812	0.0791439	0.0806056	0.122839	0.180037	0.148987	0.166166	1	0.021595	1	FALSE	-0.068463	0.0801082	-0.068463
FAM193A	FAM193A-208	ENST00000513350.2	protein_coding	FAM193A	protein_coding	0.262305	0.197837	0.169604	0.199971	0.0903893	0.153976	0.137598	1	0.021595	1	FALSE	0.0801082	0.0801082	-0.068463
FAM214A	FAM214A-210	ENST00000566948.5	retained_intron	FAM214A	protein_coding	0.119241	0.110497	0.107555	0.125853	0.0941119	0.100437	0.104966	1	0.0165383	1	FALSE	0.0159486	0.0159486
FAM216A	FAM216A-201	ENST00000377673.10	protein_coding	FAM216A	protein_coding	0.187061	0.226342	0.27016	0.229266	0.44501	0.572977	0.515702	1	0.000960552	8.55003e-05	TRUE	-0.283023	0.256038	-0.283023
FAM216A	FAM216A-204	ENST00000547539.1	retained_intron	FAM216A	protein_coding	0.534151	0.614978	0.560795	0.608984	0.380249	0.258067	0.332752	1	0.000960552	0.000898678	TRUE	0.256038	0.256038	-0.283023
FAM217B	FAM217B-201	ENST00000358293.7	protein_coding	FAM217B	protein_coding	0.0196182	0	0.0674423	0	0.653106	0.654761	0.281037	1	1.9226e-06	3.94737e-08	TRUE	-0.507869	0.482653	-0.507869
FAM217B	FAM217B-202	ENST00000360816.8	protein_coding	FAM217B	protein_coding	0.849057	1	0.724381	0.77546	0.284001	0.228469	0.551245	1	1.9226e-06	5.09147e-06	TRUE	0.482653	0.482653	-0.507869
FAM225A	FAM225A-201	ENST00000434051.1	lncRNA	FAM225A	lncRNA	0	0	0.50185	0	0.233618	0.529334	0.183352	0	0.0137577	0	TRUE	-0.189972	0.189972	-0.189972
FAM225A	FAM225A-202	ENST00000453010.2	lncRNA	FAM225A	lncRNA	1	1	0.49815	1	0.766382	0.470666	0.816648	0	0.0137577	0	TRUE	0.189972	0.189972	-0.189972
FAM27C	FAM27C-201	ENST00000377542.3	lncRNA	FAM27C	lncRNA	0.400374	0.413496	0.295382	0.222639	0.0988216	0.194901	0.149314	1	0.000359656	0.0979032	FALSE	0.185294	0.185294	-0.395754
FAM27C	FAM27C-210	ENST00000651799.1	lncRNA	FAM27C	lncRNA	0.0920694	0.0521942	0.0588779	0.134756	0.00937221	0.0395514	0.0259575	1	0.000359656	1	FALSE	0.0595139	0.185294	-0.395754
FAM27C	FAM27C-216	ENST00000656580.1	lncRNA	FAM27C	lncRNA	0.350177	0.31747	0.521077	0.309462	0.867544	0.704518	0.738841	1	0.000359656	1.2825e-06	TRUE	-0.395754	0.185294	-0.395754
FAM27C	FAM27C-226	ENST00000671566.1	lncRNA	FAM27C	lncRNA	0.15738	0.117243	0.124664	0.243951	0.0242622	0.0610299	0.059689	1	0.000359656	1	FALSE	0.112482	0.185294	-0.395754
FAM66D	FAM66D-201	ENST00000434078.3	lncRNA	FAM66D	lncRNA	0.188381	0.238427	0.143893	0.278006	0.134147	0.093389	0.0900022	1	0.00022576	1	FALSE	0.106331	0.173339	-0.215615
FAM66D	FAM66D-206	ENST00000654985.1	lncRNA	FAM66D	lncRNA	0.223728	0.150033	0.140267	0.179328	0	0	0	1	0.00022576	1	FALSE	0.173339	0.173339	-0.215615
FAM66D	FAM66D-208	ENST00000658322.1	lncRNA	FAM66D	lncRNA	0.37217	0.263446	0.380745	0.432728	0.603874	0.635709	0.494077	1	0.00022576	1	FALSE	-0.215615	0.173339	-0.215615
FAM72A	FAM72A-202	ENST00000367128.7	protein_coding	FAM72A	protein_coding	0.0593402	0.078586	0.261966	0.117603	0.570094	0.723145	0.575554	1	0.000181876	6.45287e-06	TRUE	-0.493557	0.318394	-0.493557
FAM72A	FAM72A-205	ENST00000468509.1	protein_coding	FAM72A	protein_coding	0.596372	0.649874	0.353924	0.55607	0.303781	0.211981	0.146238	1	0.000181876	0.0179719	TRUE	0.318394	0.318394	-0.493557
FAM76A	FAM76A-201	ENST00000010299.10	protein_coding	FAM76A	protein_coding	0.0457298	0	0	0	0.310542	0.28199	0.212394	1	2.4094e-09	4.89775e-06	TRUE	-0.256876	0.200005	-0.256876
FAM76A	FAM76A-202	ENST00000234549.11	protein_coding	FAM76A	protein_coding	0.154605	0.176735	0.257913	0.210765	0	0	0	1	2.4094e-09	1	FALSE	0.200005	0.200005	-0.256876
FAM98A	FAM98A-201	ENST00000238823.13	protein_coding	FAM98A	protein_coding	0.549832	0.822541	0.572208	0.646257	0.412872	0.477378	0.498783	1	0.0391298	0.426319	FALSE	0.184698	0.184698	-0.171713
FAM98A	FAM98A-203	ENST00000431950.1	protein_coding	FAM98A	protein_coding	0.225737	0	0.217315	0.161562	0.401858	0.255377	0.311363	1	0.0391298	0.00657603	TRUE	-0.171713	0.184698	-0.171713
FAM98A	FAM98A-207	ENST00000492649.1	retained_intron	FAM98A	protein_coding	0.0557264	0.0596989	0.0789682	0.0666903	0.0467382	0.0414836	0.0554725	1	0.0391298	1	FALSE	0.0173728	0.184698	-0.171713
FAN1	FAN1-218	ENST00000661974.1	nonsense_mediated_decay	FAN1	protein_coding	0	0	0.0359712	0	0.0405491	0.0614809	0.0869459	1	0.0107861	1	FALSE	-0.0539992		-0.0539992
FANCD2	FANCD2-203	ENST00000421731.5	nonsense_mediated_decay	FANCD2	protein_coding	0.12167	0.0910169	0.113019	0.101596	0.0171775	0	0	1	5.46172e-08	1	FALSE	0.1011	0.107599	-0.223434
FANCD2	FANCD2-204	ENST00000431693.1	protein_coding	FANCD2	protein_coding	0.355989	0.297912	0.275831	0.303588	0.271466	0.131143	0.199585	1	5.46172e-08	1	FALSE	0.107599	0.107599	-0.223434
FANCD2	FANCD2-213	ENST00000675286.1	protein_coding	FANCD2	protein_coding	0	0	0	0	0.257049	0.221897	0.191355	1	5.46172e-08	1	FALSE	-0.223434	0.107599	-0.223434
FANCI	FANCI-202	ENST00000310775.12	protein_coding	FANCI	protein_coding	0	0	0.183282	0	0.193275	0.216751	0.132985	0	0.000171635	3.96079e-05	TRUE	-0.135183	0.204697	-0.135183
FANCI	FANCI-208	ENST00000564920.5	protein_coding	FANCI	protein_coding	0.384138	0.493163	0.326425	0.282009	0.138208	0.151972	0.210031	1	0.000171635	0.146543	FALSE	0.204697	0.204697	-0.135183
FANCI	FANCI-212	ENST00000566895.5	retained_intron	FANCI	protein_coding	0.0442412	0.0453333	0.0671387	0.0802981	0.113009	0.100323	0.101617	1	0.000171635	1	FALSE	-0.0457302	0.204697	-0.135183
FANCI	FANCI-213	ENST00000567891.5	protein_coding	FANCI	protein_coding	0.0342647	0.0648422	0.0650558	0.0474905	0.0991969	0.122581	0.154105	1	0.000171635	1	FALSE	-0.0723812	0.204697	-0.135183
FANCI	FANCI-221	ENST00000676110.1	retained_intron	FANCI	protein_coding	0.151701	0.140949	0.157801	0.126994	0.0903708	0.0729203	0.0706974	1	0.000171635	1	FALSE	0.0663649	0.204697	-0.135183
FANCL	FANCL-201	ENST00000233741.9	protein_coding	FANCL	protein_coding	0.160248	0.109709	0.251691	0.113999	0	0	0.0682567	1	0.000116971	1	FALSE	0.136159	0.136159	-0.323707
FANCL	FANCL-202	ENST00000402135.7	protein_coding	FANCL	protein_coding	0.273601	0.372044	0.214548	0.424126	0.603491	0.704256	0.626614	1	0.000116971	0.00303143	TRUE	-0.323707	0.136159	-0.323707
FANCL	FANCL-209	ENST00000470506.1	retained_intron	FANCL	protein_coding	0.153991	0.155729	0.152788	0.100835	0.0873947	0.0801739	0.0890733	1	0.000116971	1	FALSE	0.0552885	0.136159	-0.323707
FANCL	FANCL-210	ENST00000481670.2	protein_coding	FANCL	protein_coding	0.268457	0.310682	0.341215	0.255678	0.154205	0.21557	0.216056	1	0.000116971	1	FALSE	0.0987309	0.136159	-0.323707
FANK1	FANK1-209	ENST00000492670.5	processed_transcript	FANK1	protein_coding	0.1343	0.225794	0.161899	0.148843	0.0465918	0.12803	0.0279516	1	0.0349071	1	FALSE	0.100185	0.100185
FASTKD3	FASTKD3-207	ENST00000513577.1	retained_intron	FASTKD3	protein_coding	0.349133	0.220043	0.221504	0.158294	0	0.106045	0	1	0.0344484	0.177795	FALSE	0.201895	0.201895
FAXDC2	FAXDC2-209	ENST00000520461.1	protein_coding	FAXDC2	protein_coding	0.345617	0.318439	0.403761	0.300154	0.638369	0.635148	0.410292	1	0.0230645	0.00786118	TRUE	-0.219277		-0.219277
FBN3	FBN3-201	ENST00000270509.6	protein_coding	FBN3	protein_coding	0	0	0	0	0.288173	0.673166	1	1	0.0167245	1	FALSE	-0.65378		-0.65378
FBXL5	FBXL5-203	ENST00000503196.5	protein_coding	FBXL5	protein_coding	0	0	0.0145727	0	0.0694158	0.122848	0.0193137	1	0.0499507	1	FALSE	-0.0668825		-0.0668825
FBXO11	FBXO11-208	ENST00000480038.1	processed_transcript	FBXO11	protein_coding	0.0643061	0.12044	0.115836	0.0950859	0.0369603	0.0250174	0.0595744	1	0.00197384	1	FALSE	0.0583997	0.0583997
FBXO11	FBXO11-209	ENST00000492225.5	retained_intron	FBXO11	protein_coding	0.124345	0.116363	0.128461	0.114306	0.101171	0.110566	0.0775219	1	0.00197384	1	FALSE	0.0244494	0.0583997
FBXO3	FBXO3-201	ENST00000265651.8	protein_coding	FBXO3	protein_coding	0.0775396	0	0	0	0.231673	0.534045	0.0671771	0	0.00246609	1.78609e-05	TRUE	-0.258247	0.0934524	-0.258247
FBXO3	FBXO3-202	ENST00000448981.6	protein_coding	FBXO3	protein_coding	0.254066	0.189356	0.164816	0.231449	0.142255	0.0972505	0.109902	1	0.00246609	1	FALSE	0.0934524	0.0934524	-0.258247
FBXO31	FBXO31-201	ENST00000311635.12	protein_coding	FBXO31	protein_coding	0.17149	0.232003	0.12004	0.142472	0.0755667	0.0634435	0.082797	1	0.000135819	1	FALSE	0.0925655	0.0925655	-0.12803
FBXO31	FBXO31-203	ENST00000563956.1	processed_transcript	FBXO31	protein_coding	0.0605035	0.0649305	0.0717152	0.0170018	0.106152	0.0849995	0.105273	1	0.000135819	1	FALSE	-0.0452705	0.0925655	-0.12803
FBXO31	FBXO31-205	ENST00000567622.1	processed_transcript	FBXO31	protein_coding	0.0243378	0	0.0887006	0.00999223	0.126393	0.15323	0.19674	1	0.000135819	1	FALSE	-0.12803	0.0925655	-0.12803
FBXO31	FBXO31-207	ENST00000618298.6	protein_coding	FBXO31	protein_coding	0.0835826	0.0830193	0.0763768	0.0841292	0.059348	0.0552573	0.0688132	1	0.000135819	1	FALSE	0.0206375	0.0925655	-0.12803
FBXO41	FBXO41-201	ENST00000295133.9	protein_coding	FBXO41	protein_coding	0	0	0.157442	0	0.439398	0.526638	0.178006	1	1.26616e-05	0.00367527	TRUE	-0.341987	0.438646	-0.341987
FBXO41	FBXO41-204	ENST00000520530.3	protein_coding	FBXO41	protein_coding	0.226938	0.731895	0.565736	0.614338	0.288243	0	0	0	1.26616e-05	0.000232673	TRUE	0.438646	0.438646	-0.341987
FBXO43	FBXO43-201	ENST00000428847.3	protein_coding	FBXO43	protein_coding	0	0	0	0	0.0634968	0.244497	0.162268	1	0.00207784	1	FALSE	-0.156754	0.191294	-0.156754
FBXO43	FBXO43-203	ENST00000520987.1	retained_intron	FBXO43	protein_coding	0.98588	0.979273	0.897299	0.989124	0.826285	0.650783	0.837732	1	0.00207784	0.023295	TRUE	0.191294	0.191294	-0.156754
FBXO44	FBXO44-206	ENST00000376770.5	protein_coding	FBXO44	protein_coding	0.108979	0.127566	0.0725835	0.0753169	0	0	0.0675736	1	0.0396021	1	FALSE	0.073587	0.073587
FBXO7	FBXO7-203	ENST00000420700.5	nonsense_mediated_decay	FBXO7	protein_coding	0.133306	0.11477	0.142863	0.159843	0.160816	0.160666	0.193701	1	1.56562e-06	1	FALSE	-0.0340323		-0.0715487
FBXO7	FBXO7-204	ENST00000425028.5	nonsense_mediated_decay	FBXO7	protein_coding	0	0	0.0145122	0	0.114673	0.0752009	0.0356561	1	1.56562e-06	1	FALSE	-0.0715487		-0.0715487
FCGRT	FCGRT-201	ENST00000221466.10	protein_coding	FCGRT	protein_coding	0.361922	0.503868	0.454539	0.402522	0.269401	0.159497	0.336194	1	0.00575749	0.0981807	FALSE	0.175682	0.175682	-0.185648
FCGRT	FCGRT-208	ENST00000595881.1	retained_intron	FCGRT	protein_coding	0.0878243	0.0947541	0.127763	0.123272	0.33904	0.338461	0.204654	1	0.00575749	0.0109899	TRUE	-0.185648	0.175682	-0.185648
FCGRT	FCGRT-216	ENST00000599701.5	protein_coding	FCGRT	protein_coding	0.0649377	0.0659786	0.0767451	0.0746596	0.0473637	0.0148671	0.0533226	1	0.00575749	1	FALSE	0.0320624	0.175682	-0.185648
FCHO1	FCHO1-221	ENST00000597512.1	protein_coding	FCHO1	protein_coding	0	0.0522581	0	0	0.119876	0.152532	0.0994633	1	0.00494953	1	FALSE	-0.110893		-0.110893
FER	FER-209	ENST00000618353.1	protein_coding	FER	protein_coding	0.0430108	0.0172499	0.0569907	0.035104	0.138558	0.151918	0.0899747	1	0.000159083	1	FALSE	-0.0887278		-0.0887278
FER1L4	FER1L4-202	ENST00000412452.1	retained_intron	FER1L4	transcribed_unitary_pseudogene	0.0877856	0.104021	0.09625	0.063605	0.0170243	0.0470785	0.0573192	1	0.0130858	1	FALSE	0.0474415	0.0564266
FER1L4	FER1L4-216	ENST00000674314.1	processed_transcript	FER1L4	transcribed_unitary_pseudogene	0.0718337	0.0483768	0.0541164	0.0513796	0	0	0	1	0.0130858	1	FALSE	0.0564266	0.0564266
FER1L5	FER1L5-202	ENST00000457909.2	retained_intron	FER1L5	protein_coding	0.0140877	0.0172511	0.0766623	0.0184994	0.209303	0.208943	0.138927	1	0.00693341	1	FALSE	-0.154099	0.288934	-0.154099
FER1L5	FER1L5-203	ENST00000505256.6	retained_intron	FER1L5	protein_coding	0.83097	0.874098	0.864634	0.895934	0.548755	0.527008	0.656662	1	0.00693341	0.0187017	TRUE	0.288934	0.288934	-0.154099
FER1L5	FER1L5-206	ENST00000624922.6	protein_coding	FER1L5	protein_coding	0.154942	0	0.0587041	0.085567	0.183972	0.171061	0.204411	1	0.00693341	1	FALSE	-0.111678	0.288934	-0.154099
FGD3	FGD3-202	ENST00000375482.8	protein_coding	FGD3	protein_coding	0	0	0	0	0.0612281	0.414654	0.115284	1	0.0103492	1	FALSE	-0.197055		-0.197055
FGD5-AS1	FGD5-AS1-202	ENST00000424349.1	lncRNA	FGD5-AS1	lncRNA	0.649213	0.672177	0.707215	0.59353	0.420984	0.407729	0.488061	1	0.00910544	0.272707	FALSE	0.216609	0.216609	-0.186277
FGD5-AS1	FGD5-AS1-207	ENST00000661022.1	lncRNA	FGD5-AS1	lncRNA	0.0629368	0.0356621	0	0.235444	0.366214	0.320618	0.12253	0	0.00910544	0.000947744	TRUE	-0.186277	0.216609	-0.186277
FGF2	FGF2-201	ENST00000264498.8	protein_coding	FGF2	protein_coding	1	0.341286	1	1	0.697226	0.634245	0.134843	0	0.00281139	0.0020883	TRUE	0.34655	0.34655	-0.312519
FGF2	FGF2-202	ENST00000608478.1	protein_coding	FGF2	protein_coding	0	0	0	0	0.302774	0.365755	0.269028	1	0.00281139	1	FALSE	-0.312519	0.34655	-0.312519
FGF7P3	FGF7P3-202	ENST00000640245.1	processed_transcript	FGF7P3	transcribed_unprocessed_pseudogene	0.860993	0.610404	0.940997	0.81704	0.961546	1	0.972041	1	0.0315649	0	TRUE	-0.170504	0.170504	-0.170504
FGF7P3	FGF7P3-203	ENST00000640486.1	processed_transcript	FGF7P3	transcribed_unprocessed_pseudogene	0.139007	0.389596	0.0590026	0.18296	0.0384538	0	0.0279585	1	0.0315649	0	TRUE	0.170504	0.170504	-0.170504
FGFR3	FGFR3-206	ENST00000469068.1	retained_intron	FGFR3	protein_coding	0	0	0	0.0496531	0.0851804	0.15128	0.0709459	1	0.0252047	1	FALSE	-0.0900556		-0.0900556
FGFR4	FGFR4-201	ENST00000292408.9	protein_coding	FGFR4	protein_coding	0.205028	0.189275	0.13291	0.154102	0.341781	0.310929	0.34713	1	0.0182006	1	FALSE	-0.162951	0.152481	-0.162951
FGFR4	FGFR4-212	ENST00000510911.5	protein_coding	FGFR4	protein_coding	0.359906	0.376568	0.270785	0.534125	0.211862	0.233102	0.253632	1	0.0182006	1	FALSE	0.152481	0.152481	-0.162951
FHAD1	FHAD1-211	ENST00000471347.5	processed_transcript	FHAD1	protein_coding	0	0	0.0104865	0.0528863	0.0797076	0.0557759	0.091464	1	0.0103142	1	FALSE	-0.059806		-0.0648692
FHAD1	FHAD1-218	ENST00000483694.1	processed_transcript	FHAD1	protein_coding	0	0	0	0.049192	0.0565533	0.0949433	0.080005	1	0.0103142	1	FALSE	-0.0648692		-0.0648692
FIGNL1	FIGNL1-205	ENST00000422854.5	protein_coding	FIGNL1	protein_coding	0	0	0	0	0.108058	0.193885	0.132229	1	0.000288864	1	FALSE	-0.144724		-0.255304
FIGNL1	FIGNL1-212	ENST00000613602.3	protein_coding	FIGNL1	protein_coding	0	0	0	0.263828	0.378803	0.25734	0.327639	0	0.000288864	0.00652069	TRUE	-0.255304		-0.255304
FKBP15	FKBP15-203	ENST00000446284.6	protein_coding	FKBP15	protein_coding	0.345002	0.0946812	0	0	0.392641	0.296366	0.312097	0	0.00079531	0.000943082	TRUE	-0.223781		-0.223781
FKTN	FKTN-214	ENST00000644273.1	nonsense_mediated_decay	FKTN	protein_coding	0.0511903	0.0694271	0	0.049297	0.101207	0.118133	0.103989	1	0.0089419	1	FALSE	-0.0652976		-0.0652976
FLJ46284	FLJ46284-202	ENST00000521148.5	lncRNA	FLJ46284	lncRNA	0	0	0	0.228068	0.41653	0.350445	0.449668	1	0.0013855	0.000448469	TRUE	-0.348531	0.456073	-0.348531
FLJ46284	FLJ46284-204	ENST00000623616.1	TEC	FLJ46284	lncRNA	0.938576	0.959447	0.900137	0.667081	0.299487	0.462617	0.468609	1	0.0013855	0.000976078	TRUE	0.456073	0.456073	-0.348531
FLNB	FLNB-201	ENST00000295956.9	protein_coding	FLNB	protein_coding	0.295093	0.126049	0.187075	0.360966	0	0	0.093351	1	2.48665e-09	3.02643e-13	TRUE	0.211179	0.211179	-0.205712
FLNB	FLNB-202	ENST00000358537.7	protein_coding	FLNB	protein_coding	0.351461	0.479757	0.446599	0.286038	0.574527	0.680901	0.5346	1	2.48665e-09	0.0128969	TRUE	-0.205712	0.211179	-0.205712
FLNC	FLNC-201	ENST00000325888.13	protein_coding	FLNC	protein_coding	0.970252	1	0.911301	0.918258	0.658418	0.572466	0.856026	1	0.00217192	0	TRUE	0.254316	0.254316	-0.254316
FLNC	FLNC-202	ENST00000346177.6	protein_coding	FLNC	protein_coding	0.0297482	0	0.0886992	0.0817416	0.341582	0.427534	0.143974	1	0.00217192	0	TRUE	-0.254316	0.254316	-0.254316
FLT1	FLT1-206	ENST00000615611.4	protein_coding	FLT1	protein_coding	0	0	0.0914423	0	0.327521	0.237329	0.101517	1	2.0797e-05	7.91262e-06	TRUE	-0.199262		-0.199262
FMO4	FMO4-203	ENST00000475780.5	processed_transcript	FMO4	protein_coding	0	0.268761	0	0	0.167223	0.465489	0.316947	0	0.0333892	0.0145814	TRUE	-0.249363		-0.249363
FN3K	FN3K-202	ENST00000570734.1	retained_intron	FN3K	protein_coding	0.184806	0.14737	0.197344	0.229585	0.350398	0.313725	0.280275	1	0.0271451	1	FALSE	-0.125023	0.152369	-0.125023
FN3K	FN3K-205	ENST00000574496.5	retained_intron	FN3K	protein_coding	0.267913	0.193566	0.265697	0.24566	0.0230635	0.153488	0.095968	1	0.0271451	1	FALSE	0.152369	0.152369	-0.125023
FNBP1	FNBP1-203	ENST00000443566.6	protein_coding	FNBP1	protein_coding	0.0219076	0.10059	0.107991	0.00432616	0.164465	0.152385	0.127035	1	0.00338353	1	FALSE	-0.0892581	0.113387	-0.0892581
FNBP1	FNBP1-204	ENST00000446176.7	protein_coding	FNBP1	protein_coding	0.158359	0.235921	0.222845	0.20257	0.157666	0	0.116943	1	0.00338353	1	FALSE	0.113387	0.113387	-0.0892581
FNBP1L	FNBP1L-202	ENST00000271234.12	protein_coding	FNBP1L	protein_coding	0.142035	0.0780093	0.0874581	0.0820394	0.0452609	0.00685138	0.0677534	1	0.0216187	1	FALSE	0.0574303	0.0574303	-0.135091
FNBP1L	FNBP1L-203	ENST00000370253.6	protein_coding	FNBP1L	protein_coding	0	0.144216	0.124368	0.071151	0.21781	0.284411	0.157852	1	0.0216187	1	FALSE	-0.135091	0.0574303	-0.135091
FNDC3A	FNDC3A-202	ENST00000398316.7	protein_coding	FNDC3A	protein_coding	0.483561	0.449868	0.492805	0.420516	0.292091	0.239865	0.404871	1	0.021545	1	FALSE	0.149412	0.149412	-0.149381
FNDC3A	FNDC3A-204	ENST00000492622.6	protein_coding	FNDC3A	protein_coding	0.226978	0.219555	0.19423	0.195512	0.349405	0.472676	0.25327	1	0.021545	0.0136334	TRUE	-0.149381	0.149412	-0.149381
FOXK2	FOXK2-201	ENST00000335255.10	protein_coding	FOXK2	protein_coding	0.298	0.29309	0.334783	0.346428	0.232872	0.240287	0.265392	1	3.39617e-06	1	FALSE	0.0718912	0.089989	-0.0817731
FOXK2	FOXK2-202	ENST00000473637.6	nonsense_mediated_decay	FOXK2	protein_coding	0.0261996	0.019505	0	0	0.0791723	0.110282	0.0901436	1	3.39617e-06	1	FALSE	-0.0817731	0.089989	-0.0817731
FOXK2	FOXK2-205	ENST00000529652.1	processed_transcript	FOXK2	protein_coding	0.0514364	0.0517802	0.0556036	0.0733953	0.0415308	0.0355369	0.0437439	1	3.39617e-06	1	FALSE	0.0177834	0.089989	-0.0817731
FOXK2	FOXK2-206	ENST00000531030.5	protein_coding	FOXK2	protein_coding	0.183733	0.150247	0.144529	0.161777	0.0803021	0.129945	0	1	3.39617e-06	1	FALSE	0.089989	0.089989	-0.0817731
FOXK2	FOXK2-211	ENST00000575578.1	protein_coding	FOXK2	protein_coding	0.100125	0.111827	0.123865	0.10407	0.193559	0.174972	0.175171	1	3.39617e-06	1	FALSE	-0.0712623	0.089989	-0.0817731
FOXM1	FOXM1-203	ENST00000361953.7	protein_coding	FOXM1	protein_coding	0	0	0	0	0.107346	0.148295	0.0526995	1	1.49095e-07	1	FALSE	-0.10278		-0.10278
FOXM1	FOXM1-210	ENST00000627656.2	protein_coding	FOXM1	protein_coding	0	0	0.0557159	0.0486725	0.103869	0.0916654	0.0775309	1	1.49095e-07	1	FALSE	-0.0649247		-0.10278
FRG1-DT	FRG1-DT-201	ENST00000501825.2	lncRNA	FRG1-DT	lncRNA	0	0.0096508	0.00687411	0	0.0543912	0.154865	0.0492282	1	0.000828559	1	FALSE	-0.0820301		-0.0820301
FRMD1	FRMD1-203	ENST00000358587.5	retained_intron	FRMD1	protein_coding	0.728192	0.903313	0.773042	0.69312	0.45337	0.43302	0.649197	1	0.00213354	0.122867	FALSE	0.262554	0.262554	-0.160416
FRMD1	FRMD1-205	ENST00000440994.6	protein_coding	FRMD1	protein_coding	0	0	0.0414825	0	0.165191	0.284188	0.0629812	1	0.00213354	0.00977866	TRUE	-0.160416	0.262554	-0.160416
FRMD1	FRMD1-210	ENST00000644440.1	protein_coding	FRMD1	protein_coding	0.0300916	0.0966868	0	0.121003	0.198146	0.186077	0.141862	1	0.00213354	1	FALSE	-0.113416	0.262554	-0.160416
FSTL5	FSTL5-203	ENST00000427802.2	protein_coding	FSTL5	protein_coding	0	0	0	0.389957	0.541587	0.44565	0.668477	1	0.0366012	0.0181437	TRUE	-0.454415		-0.454415
FTCD	FTCD-203	ENST00000397746.8	protein_coding	FTCD	protein_coding	0.18984	0.162959	0.0748854	0.0983611	0.0375118	0.0464504	0.0371461	1	1.05379e-10	1	FALSE	0.0911418	0.165545	-0.163564
FTCD	FTCD-205	ENST00000446405.5	protein_coding	FTCD	protein_coding	0	0	0.0282463	0.0750519	0.184092	0.130843	0.203957	1	1.05379e-10	1	FALSE	-0.14714	0.165545	-0.163564
FTCD	FTCD-206	ENST00000460011.5	processed_transcript	FTCD	protein_coding	0.170347	0.121915	0.172723	0.180709	0.181403	0.23686	0.300862	1	1.05379e-10	1	FALSE	-0.0782844	0.165545	-0.163564
FTCD	FTCD-207	ENST00000469240.1	retained_intron	FTCD	protein_coding	0.217088	0.224614	0.181141	0.145978	0.0213738	0.0202273	0.0484141	1	1.05379e-10	1	FALSE	0.1622	0.165545	-0.163564
FTCD	FTCD-208	ENST00000480950.1	processed_transcript	FTCD	protein_coding	0.195763	0.282641	0.120243	0.155924	0	0.0132857	0.0560078	1	1.05379e-10	0.000140356	TRUE	0.165545	0.165545	-0.163564
FTCD	FTCD-211	ENST00000494498.1	processed_transcript	FTCD	protein_coding	0	0.0645912	0.0740481	0.0582427	0.234791	0.304316	0.0992457	1	1.05379e-10	0.0130717	TRUE	-0.163564	0.165545	-0.163564
FTCD	FTCD-212	ENST00000498355.6	processed_transcript	FTCD	protein_coding	0.0721869	0.0483682	0.0827612	0.0113021	0.0078439	0.00818492	0	1	1.05379e-10	1	FALSE	0.0483117	0.165545	-0.163564
FTH1	FTH1-201	ENST00000273550.12	protein_coding	FTH1	protein_coding	0.259707	0.271054	0.284804	0.268237	0.470592	0.326845	0.291724	1	0.000339471	1	FALSE	-0.0921031		-0.0921031
FTO	FTO-212	ENST00000636030.1	processed_transcript	FTO	protein_coding	0.274271	0.269925	0.246693	0.263492	0.230234	0.184411	0.212414	1	0.0157419	1	FALSE	0.0545757	0.0545757
FTX	FTX-201	ENST00000418855.6	lncRNA	FTX	lncRNA	0.124621	0.122054	0.123398	0.0900279	0.052652	0.0261131	0.0695428	1	8.83675e-07	1	FALSE	0.0655891	0.0655891	-0.149776
FTX	FTX-222	ENST00000651703.1	lncRNA	FTX	lncRNA	0.159941	0.16695	0.174069	0.207504	0.372722	0.377868	0.230086	1	8.83675e-07	1	FALSE	-0.149776	0.0655891	-0.149776
FTX	FTX-251	ENST00000660100.1	lncRNA	FTX	lncRNA	0.173349	0.177857	0.167346	0.158836	0.134161	0.135488	0.151447	1	8.83675e-07	1	FALSE	0.0289822	0.0655891	-0.149776
FUBP3	FUBP3-201	ENST00000319725.10	protein_coding	FUBP3	protein_coding	0.657485	0.689299	0.639233	0.540353	0.43264	0.332715	0.453951	1	0.000516871	0.00215278	TRUE	0.225157	0.225157	-0.057381
FUBP3	FUBP3-204	ENST00000472006.1	processed_transcript	FUBP3	protein_coding	0.11504	0.0925918	0.0496102	0.053923	0.151195	0.123973	0.130349	1	0.000516871	1	FALSE	-0.057381	0.225157	-0.057381
FUBP3	FUBP3-205	ENST00000487406.2	processed_transcript	FUBP3	protein_coding	0.0200177	0.0240741	0.0631077	0.0424345	0.09096	0.0990387	0.0877882	1	0.000516871	1	FALSE	-0.0551872	0.225157	-0.057381
FUNDC2	FUNDC2-202	ENST00000456179.1	nonsense_mediated_decay	FUNDC2	protein_coding	0.515235	0.500911	0.504297	0.444005	0.410911	0.338871	0.423675	1	0.0129042	1	FALSE	0.0999595	0.0999595	-0.0925019
FUNDC2	FUNDC2-205	ENST00000484175.5	processed_transcript	FUNDC2	protein_coding	0.14942	0.174114	0.203879	0.206202	0.250478	0.370886	0.206354	1	0.0129042	1	FALSE	-0.0925019	0.0999595	-0.0925019
FUNDC2	FUNDC2-206	ENST00000485289.5	retained_intron	FUNDC2	protein_coding	0.0506187	0.061672	0.0394594	0.0997535	0.179736	0.139025	0.112429	1	0.0129042	1	FALSE	-0.080854	0.0999595	-0.0925019
FXN	FXN-203	ENST00000484259.3	protein_coding	FXN	protein_coding	0.405668	0.341292	0.389322	0.388469	0.58557	0.592914	0.573595	1	0.000361477	1	FALSE	-0.202838	0.220259	-0.202838
FXN	FXN-204	ENST00000498653.5	protein_coding	FXN	protein_coding	0.139944	0.44137	0.360354	0.144637	0.153952	0	0	0	0.000361477	0.000676822	TRUE	0.220259	0.220259	-0.202838
FYN	FYN-201	ENST00000229471.8	protein_coding	FYN	protein_coding	0	0.0133191	0.025822	0.0427069	0.0603236	0.0683787	0.0846426	1	0.0134126	1	FALSE	-0.050653	0.0500244	-0.050653
FYN	FYN-210	ENST00000471959.2	retained_intron	FYN	protein_coding	0.0876653	0.0522305	0.096316	0.094961	0.0461336	0.0359285	0.0477283	1	0.0134126	1	FALSE	0.0395297	0.0500244	-0.050653
FYN	FYN-215	ENST00000495927.5	retained_intron	FYN	protein_coding	0.0890746	0.105603	0.101751	0.0798548	0.017303	0.0411859	0.0736505	1	0.0134126	1	FALSE	0.0500244	0.0500244	-0.050653
FYTTD1	FYTTD1-201	ENST00000241502.9	protein_coding	FYTTD1	protein_coding	0.541694	0.519941	0.494103	0.497534	0.420123	0.414787	0.44867	1	0.0170185	1	FALSE	0.0854581	0.0854581	-0.0803094
FYTTD1	FYTTD1-202	ENST00000412924.5	nonsense_mediated_decay	FYTTD1	protein_coding	0.0397974	0.0366007	0.0591958	0.0573858	0.114182	0.174559	0.0969215	1	0.0170185	1	FALSE	-0.0803094	0.0854581	-0.0803094
FYTTD1	FYTTD1-203	ENST00000415708.6	protein_coding	FYTTD1	protein_coding	0.190558	0.204484	0.230678	0.18653	0.158036	0.167967	0.136782	1	0.0170185	1	FALSE	0.0488009	0.0854581	-0.0803094
FYTTD1	FYTTD1-205	ENST00000424384.2	protein_coding	FYTTD1	protein_coding	0.106563	0.142871	0.128137	0.162696	0.19229	0.210204	0.22041	1	0.0170185	1	FALSE	-0.0725676	0.0854581	-0.0803094
FZD6	FZD6-201	ENST00000358755.5	protein_coding	FZD6	protein_coding	0.403874	0.479412	0	0.466181	0.754702	0.583291	0.667819	1	0.00670795	0.0449467	TRUE	-0.331237	0.23416	-0.331237
FZD6	FZD6-204	ENST00000522484.5	nonsense_mediated_decay	FZD6	protein_coding	0.358064	0.240647	0.530861	0.155131	0	0.122365	0.138683	1	0.00670795	0.25372	FALSE	0.23416	0.23416	-0.331237
G6PD	G6PD-202	ENST00000393562.10	protein_coding	G6PD	protein_coding	0.750659	0.728027	0.76859	0.734334	0.489274	0.574172	0.601265	1	9.99355e-05	3.68891e-06	TRUE	0.190499	0.190499	-0.0779717
G6PD	G6PD-203	ENST00000393564.6	protein_coding	G6PD	protein_coding	0.0477669	0.0616863	0.0861922	0.049643	0.177134	0.121435	0.119312	1	9.99355e-05	1	FALSE	-0.0779717	0.190499	-0.0779717
G6PD	G6PD-208	ENST00000489497.1	retained_intron	G6PD	protein_coding	0.0943117	0.081579	0.0504655	0.0832878	0.157125	0.0987836	0.119909	1	9.99355e-05	1	FALSE	-0.0478616	0.190499	-0.0779717
G6PD	G6PD-211	ENST00000647501.1	retained_intron	G6PD	protein_coding	0.0322167	0.0265414	0.027471	0.0438722	0.0529512	0.115886	0.0788933	1	9.99355e-05	1	FALSE	-0.0500514	0.190499	-0.0779717
GAB3	GAB3-205	ENST00000475685.1	processed_transcript	GAB3	protein_coding	0.133519	0.220965	0.248099	0.191543	0	0	0.12994	1	3.2571e-05	1	FALSE	0.155218	0.155218	-0.0774663
GAB3	GAB3-206	ENST00000496390.5	processed_transcript	GAB3	protein_coding	0	0.0336048	0.0534081	0.0481177	0.124835	0.152438	0.0564739	1	3.2571e-05	1	FALSE	-0.0774663	0.155218	-0.0774663
GABPB1-AS1	GABPB1-AS1-202	ENST00000499624.3	lncRNA	GABPB1-AS1	lncRNA	0.509163	0.464737	0.529817	0.517225	0.554805	0.549289	0.614248	1	0.0223652	1	FALSE	-0.0675454	0.148631	-0.0675454
GABPB1-AS1	GABPB1-AS1-206	ENST00000619314.1	lncRNA	GABPB1-AS1	lncRNA	0.346807	0.340872	0.401283	0.346563	0.183301	0.232167	0.215282	1	0.0223652	1	FALSE	0.148631	0.148631	-0.0675454
GABRR1	GABRR1-204	ENST00000457434.1	nonsense_mediated_decay	GABRR1	protein_coding	0	0	0	0	0.596369	0.437263	0.418013	1	0.0152855	1	FALSE	-0.483882		-0.483882
GALNT15	GALNT15-201	ENST00000339732.10	protein_coding	GALNT15	protein_coding	0.362575	0.412068	0.444573	0.358634	0.164919	0.0298777	0.109785	1	0.00346016	0.00145333	TRUE	0.292936	0.292936	-0.242189
GALNT15	GALNT15-206	ENST00000617544.3	protein_coding	GALNT15	protein_coding	0.418077	0.172108	0.135261	0.171843	0.471029	0.471162	0.457343	1	0.00346016	0.0702538	FALSE	-0.242189	0.292936	-0.242189
GALNT17	GALNT17-201	ENST00000333538.10	protein_coding	GALNT17	protein_coding	0.759463	0.909176	0.730769	0.775417	0.599012	0.430609	0.621155	1	0.00552113	0.0161095	TRUE	0.243448	0.243448	-0.120863
GALNT17	GALNT17-202	ENST00000447516.5	protein_coding	GALNT17	protein_coding	0.0539534	0	0	0.0700736	0.12276	0.129182	0.203666	1	0.00552113	1	FALSE	-0.120863	0.243448	-0.120863
GALNT8	GALNT8-201	ENST00000252318.7	protein_coding	GALNT8	protein_coding	0.606028	0.528616	0.788125	0.622475	0.455604	0.409772	0.289874	1	0.0358594	1	FALSE	0.251228	0.251228	-0.356775
GALNT8	GALNT8-204	ENST00000542998.5	protein_coding	GALNT8	protein_coding	0.393972	0	0	0	0.386505	0.385985	0.593315	0	0.0358594	0.00260128	TRUE	-0.356775	0.251228	-0.356775
GAPVD1	GAPVD1-207	ENST00000394105.6	protein_coding	GAPVD1	protein_coding	0.0410508	0.0511589	0.0503615	0.062134	0.207986	0.203129	0.120074	1	0.00263964	1	FALSE	-0.125887	0.0280374	-0.125887
GAPVD1	GAPVD1-216	ENST00000474637.5	retained_intron	GAPVD1	protein_coding	0.105981	0.108244	0.100359	0.0814979	0.0652629	0.0731816	0.0745044	1	0.00263964	1	FALSE	0.0280374	0.0280374	-0.125887
GAS5	GAS5-218	ENST00000448718.5	lncRNA	GAS5	lncRNA	0.221581	0.218256	0.165325	0.213057	0.233537	0.240941	0.227858	1	0.00044185	1	FALSE	-0.0295573		-0.0295573
GATA4	GATA4-202	ENST00000526021.1	retained_intron	GATA4	protein_coding	0.0873426	0.0737646	0.0703146	0.0595153	0.0400937	0.0489241	0.0416954	1	2.56332e-05	1	FALSE	0.0291632	0.087144	-0.0861312
GATA4	GATA4-204	ENST00000526974.1	protein_coding	GATA4	protein_coding	0.0198546	0.00726077	0.0238495	0.0301901	0.106639	0.0736844	0.0483598	1	2.56332e-05	1	FALSE	-0.055939	0.087144	-0.0861312
GATA4	GATA4-206	ENST00000528712.5	protein_coding	GATA4	protein_coding	0.0715714	0.0843779	0.0623301	0.0887452	0.179753	0.197211	0.111698	1	2.56332e-05	1	FALSE	-0.0861312	0.087144	-0.0861312
GATA4	GATA4-208	ENST00000532977.1	protein_coding	GATA4	protein_coding	0.141048	0.178557	0.158941	0.142519	0.0643954	0.0483049	0.0916667	1	2.56332e-05	1	FALSE	0.087144	0.087144	-0.0861312
GATAD2B	GATAD2B-202	ENST00000634401.1	protein_coding	GATAD2B	protein_coding	0	0.0269694	0.0154983	0.050517	0.0666957	0.105138	0.0717547	1	0.0247603	1	FALSE	-0.0579499		-0.0579499
GATAD2B	GATAD2B-204	ENST00000634544.1	protein_coding	GATAD2B	protein_coding	0.0848186	0.098993	0.113108	0.0463413	0.127747	0.141089	0.161556	1	0.0247603	1	FALSE	-0.057649		-0.0579499
GCDH	GCDH-201	ENST00000222214.10	protein_coding	GCDH	protein_coding	0.310191	0.272036	0.423075	0.398398	0.237995	0	0.24379	1	0.000542257	0.398368	FALSE	0.19033	0.19033	-0.134552
GCDH	GCDH-212	ENST00000590530.5	nonsense_mediated_decay	GCDH	protein_coding	0.0782294	0	0.0322193	0.0178285	0.101788	0.178297	0.133763	1	0.000542257	1	FALSE	-0.10588	0.19033	-0.134552
GCDH	GCDH-213	ENST00000590627.5	retained_intron	GCDH	protein_coding	0	0	0.0981086	0	0.130157	0.198598	0.148482	1	0.000542257	1	FALSE	-0.134552	0.19033	-0.134552
GCK	GCK-201	ENST00000336642.9	protein_coding	GCK	protein_coding	0.729147	0.680398	0.568495	0.441629	0.38203	0	0	1	0.0349071	0.102388	FALSE	0.477574	0.477574
GCNA	GCNA-201	ENST00000373695.1	protein_coding	GCNA	protein_coding	0.803501	0.708462	0.707475	0.62804	0.471293	0.288968	0.527739	1	0.000582201	0.000126019	TRUE	0.282536	0.282536	-0.287782
GCNA	GCNA-202	ENST00000373696.7	protein_coding	GCNA	protein_coding	0.106385	0.194832	0.212982	0.258886	0.430791	0.654116	0.358253	1	0.000582201	3.07227e-05	TRUE	-0.287782	0.282536	-0.287782
GCSAML	GCSAML-201	ENST00000366488.5	protein_coding	GCSAML	protein_coding	0.443225	0.54121	0.375759	0.644107	0.124689	0.269355	0.179436	1	0.0116406	0.265157	FALSE	0.309915	0.309915	-0.247435
GCSAML	GCSAML-209	ENST00000531662.1	processed_transcript	GCSAML	protein_coding	0.556775	0.45879	0.451346	0.248726	0.652446	0.730645	0.645941	1	0.0116406	0.980543	FALSE	-0.247435	0.309915	-0.247435
GDPD4	GDPD4-203	ENST00000527489.1	processed_transcript	GDPD4	protein_coding	0	0	0.0799567	0	0.123401	0.123282	0.266256	1	0.0383124	1	FALSE	-0.15099		-0.161226
GDPD4	GDPD4-205	ENST00000532907.1	processed_transcript	GDPD4	protein_coding	0	0	0	0.0470957	0.14279	0.181503	0.194707	1	0.0383124	1	FALSE	-0.161226		-0.161226
GDPD5	GDPD5-201	ENST00000336898.8	protein_coding	GDPD5	protein_coding	0.400725	0.190167	0.197371	0.219957	0.118244	0.175752	0.0947461	1	0.0130858	1	FALSE	0.122474	0.122474	-0.0671551
GDPD5	GDPD5-203	ENST00000524785.1	processed_transcript	GDPD5	protein_coding	0	0	0	0	0.0811495	0.0712992	0.0490167	1	0.0130858	1	FALSE	-0.0671551	0.122474	-0.0671551
GDPD5	GDPD5-205	ENST00000527322.5	processed_transcript	GDPD5	protein_coding	0	0.065459	0.0721306	0.0841128	0.0928226	0.0999001	0.142211	1	0.0130858	1	FALSE	-0.0562188	0.122474	-0.0671551
GEMIN4	GEMIN4-207	ENST00000576778.1	protein_coding	GEMIN4	protein_coding	0.370408	0.28988	0.260442	0.305755	0.178516	0.211681	0.241645	1	0.0358716	1	FALSE	0.0960072	0.0960072
GFPT1	GFPT1-202	ENST00000361060.5	protein_coding	GFPT1	protein_coding	0.647116	0.654464	0.525218	0.676346	0.37169	0.350993	0.346638	1	0.00313639	0.00522844	TRUE	0.269346	0.269346	-0.223393
GFPT1	GFPT1-204	ENST00000674438.1	protein_coding	GFPT1	protein_coding	0.262122	0.214773	0.374086	0.271612	0.548707	0.537208	0.426208	1	0.00313639	0.0350107	TRUE	-0.223393	0.269346	-0.223393
GGNBP2	GGNBP2-212	ENST00000613102.5	protein_coding	GGNBP2	protein_coding	0.262168	0.344356	0.307606	0.333763	0.394946	0.46897	0.460146	1	1.14303e-10	1	FALSE	-0.129381	0.113703	-0.129381
GGNBP2	GGNBP2-214	ENST00000616019.1	protein_coding	GGNBP2	protein_coding	0.154008	0.0789603	0.178001	0.054242	0	0.00779854	0	1	1.14303e-10	1	FALSE	0.113703	0.113703	-0.129381
GGT1	GGT1-201	ENST00000400380.5	protein_coding	GGT1	protein_coding	0.0391141	0.0345491	0.0237623	0.0541781	0.0872625	0.0576752	0.146637	1	0.000192304	1	FALSE	-0.0592907	0.11893	-0.144391
GGT1	GGT1-212	ENST00000425895.5	nonsense_mediated_decay	GGT1	protein_coding	0.111365	0.0936326	0.0946506	0.0772621	0.176728	0.146734	0.141992	1	0.000192304	1	FALSE	-0.0609238	0.11893	-0.144391
GGT1	GGT1-216	ENST00000438643.6	protein_coding	GGT1	protein_coding	0.12971	0.0495755	0.157595	0.138841	0	0	0	1	0.000192304	1	FALSE	0.11893	0.11893	-0.144391
GGT1	GGT1-225	ENST00000487766.1	retained_intron	GGT1	protein_coding	0.0611591	0.0355592	0.0545561	0.0279568	0.216538	0.274873	0.076187	1	0.000192304	1	FALSE	-0.144391	0.11893	-0.144391
GGT6	GGT6-202	ENST00000381550.8	protein_coding	GGT6	protein_coding	0	0	0	0	0.102782	0.109339	0.105873	1	0.0210828	1	FALSE	-0.105998		-0.105998
GINS4	GINS4-205	ENST00000520631.5	retained_intron	GINS4	protein_coding	0.0899508	0	0	0	0.331925	0.174262	0.164362	1	0.031815	0.00713815	TRUE	-0.201029	0.251991	-0.201029
GINS4	GINS4-206	ENST00000520710.5	protein_coding	GINS4	protein_coding	0.585053	0.705431	0.592448	0.618721	0.327838	0.335719	0.456709	1	0.031815	1	FALSE	0.251991	0.251991	-0.201029
GIT2	GIT2-204	ENST00000361006.9	protein_coding	GIT2	protein_coding	0	0	0	0.115756	0.169034	0.309572	0.0806912	0	1.5758e-08	3.10381e-11	TRUE	-0.157494		-0.157494
GIT2	GIT2-218	ENST00000551721.1	retained_intron	GIT2	protein_coding	0.0469898	0.0394879	0.0466736	0.0472814	0.0621852	0.0502442	0.0553578	1	1.5758e-08	1	FALSE	-0.0108209		-0.157494
GKAP1	GKAP1-201	ENST00000376362.1	processed_transcript	GKAP1	protein_coding	0.140423	0.151287	0.122367	0.13136	0.0767563	0.0751625	0.0705819	1	0.0266715	1	FALSE	0.0621924	0.0931349
GKAP1	GKAP1-207	ENST00000491634.1	processed_transcript	GKAP1	protein_coding	0.183788	0.121779	0.111495	0.0857157	0.0160834	0	0.0815952	1	0.0266715	1	FALSE	0.0931349	0.0931349
GLB1L	GLB1L-202	ENST00000392089.6	protein_coding	GLB1L	protein_coding	0.0127354	0.0282419	0.0135741	0	0.0968371	0.0937391	0.117022	1	8.1001e-05	1	FALSE	-0.088895	0.236841	-0.122682
GLB1L	GLB1L-204	ENST00000424620.1	protein_coding	GLB1L	protein_coding	0.347541	0.309496	0.197082	0.34874	0.0268374	0.0397125	0.125071	1	8.1001e-05	0.0029449	TRUE	0.236841	0.236841	-0.122682
GLB1L	GLB1L-206	ENST00000432839.1	protein_coding	GLB1L	protein_coding	0	0	0.239741	0	0.258303	0.179961	0.109587	0	8.1001e-05	0.00224816	TRUE	-0.122682	0.236841	-0.122682
GLG1	GLG1-202	ENST00000422840.7	protein_coding	GLG1	protein_coding	0.387797	0.381903	0.356255	0.336033	0.216414	0.201884	0.279504	1	0.0236659	1	FALSE	0.132896	0.132896	-0.0864632
GLG1	GLG1-203	ENST00000447066.6	protein_coding	GLG1	protein_coding	0.120865	0.11181	0.147519	0.166277	0.215234	0.248605	0.205404	1	0.0236659	1	FALSE	-0.0864632	0.132896	-0.0864632
GLI3	GLI3-201	ENST00000395925.8	protein_coding	GLI3	protein_coding	0.159181	0.0914423	0.110718	0.174076	0	0	0.0793161	1	0.00446987	1	FALSE	0.107416	0.107416	-0.103827
GLI3	GLI3-206	ENST00000642432.1	protein_coding	GLI3	protein_coding	0	0	0	0	0.0815422	0.0753731	0.154566	1	0.00446987	1	FALSE	-0.103827	0.107416	-0.103827
GLMP	GLMP-201	ENST00000362007.6	protein_coding	GLMP	protein_coding	0.172645	0.161098	0.132327	0.105401	0	0	0.0887471	1	5.96209e-05	1	FALSE	0.113285	0.113285	-0.143768
GLMP	GLMP-204	ENST00000472870.5	nonsense_mediated_decay	GLMP	protein_coding	0.122816	0.150331	0.193486	0.138205	0.0979377	0.102014	0.112252	1	5.96209e-05	1	FALSE	0.0471415	0.113285	-0.143768
GLMP	GLMP-207	ENST00000480968.1	processed_transcript	GLMP	protein_coding	0.704538	0.688571	0.674187	0.637436	0.849229	0.838468	0.772158	1	5.96209e-05	1	FALSE	-0.143768	0.113285	-0.143768
GLT8D1	GLT8D1-201	ENST00000266014.10	protein_coding	GLT8D1	protein_coding	0.204606	0.132146	0.120436	0.0756893	0	0	0.0472949	1	4.56312e-06	1	FALSE	0.117454	0.117454	-0.214014
GLT8D1	GLT8D1-202	ENST00000394783.7	protein_coding	GLT8D1	protein_coding	0.0329387	0	0.141336	0.250509	0.29651	0.412326	0.251794	1	4.56312e-06	9.31755e-05	TRUE	-0.214014	0.117454	-0.214014
GLT8D1	GLT8D1-203	ENST00000463762.1	processed_transcript	GLT8D1	protein_coding	0.0553387	0.0703533	0.0497153	0.0448337	0.0992112	0.110019	0.101126	1	4.56312e-06	1	FALSE	-0.0483917	0.117454	-0.214014
GLT8D1	GLT8D1-206	ENST00000478968.6	protein_coding	GLT8D1	protein_coding	0.170657	0.127318	0.16467	0.238442	0.0624532	0.115026	0.124031	1	4.56312e-06	1	FALSE	0.0747681	0.117454	-0.214014
GLYR1	GLYR1-203	ENST00000586095.1	retained_intron	GLYR1	protein_coding	0.146416	0.124745	0.205004	0.117359	0.067882	0.115917	0.103796	1	0.00216028	1	FALSE	0.0525161	0.0525161	-0.043248
GLYR1	GLYR1-207	ENST00000587936.5	nonsense_mediated_decay	GLYR1	protein_coding	0.0710617	0.0518189	0.0655205	0.0448139	0.0960755	0.11916	0.0894201	1	0.00216028	1	FALSE	-0.043248	0.0525161	-0.043248
GLYR1	GLYR1-209	ENST00000588732.5	nonsense_mediated_decay	GLYR1	protein_coding	0.0626553	0.03849	0.0724548	0.054163	0.101105	0.0831261	0.105856	1	0.00216028	1	FALSE	-0.0397548	0.0525161	-0.043248
GMEB1	GMEB1-203	ENST00000373816.6	protein_coding	GMEB1	protein_coding	1	0.977073	0.952727	0.967928	0.891017	0.871159	0.907622	1	0.0416632	0	TRUE	0.0844993	0.0844993	-0.0844993
GMEB1	GMEB1-204	ENST00000480454.1	processed_transcript	GMEB1	protein_coding	0	0.0229268	0.0472732	0.0320721	0.108983	0.128841	0.092378	1	0.0416632	0	TRUE	-0.0844993	0.0844993	-0.0844993
GMPPA	GMPPA-214	ENST00000635609.1	processed_transcript	GMPPA	protein_coding	0.359126	0.0656841	0.133335	0.0413339	0	0	0	1	0.0354594	1	FALSE	0.14987	0.14987
GNAQ	GNAQ-201	ENST00000286548.9	protein_coding	GNAQ	protein_coding	0.714198	0.754231	0.764283	0.761815	0.886421	0.850274	0.844996	1	0.0233024	0	TRUE	-0.111932	0.111932	-0.111932
GNAQ	GNAQ-202	ENST00000411677.1	protein_coding	GNAQ	protein_coding	0.285802	0.245769	0.235717	0.238185	0.113579	0.149726	0.155004	1	0.0233024	0	TRUE	0.111932	0.111932	-0.111932
GOLGA3	GOLGA3-201	ENST00000204726.8	protein_coding	GOLGA3	protein_coding	0.115912	0.158731	0.142976	0.0913536	0.0734563	0.028255	0.0515533	1	0.0378579	1	FALSE	0.076155	0.076155
GOLGA8K	GOLGA8K-201	ENST00000435655.2	retained_intron	GOLGA8K	protein_coding	0.766487	0.696067	0.693101	0.805763	0.530222	0.388382	0.555677	1	0.0237637	0	TRUE	0.248927	0.248927	-0.248927
GOLGA8K	GOLGA8K-202	ENST00000512626.2	protein_coding	GOLGA8K	protein_coding	0.233513	0.303933	0.306899	0.194237	0.469778	0.611618	0.444323	1	0.0237637	0	TRUE	-0.248927	0.248927	-0.248927
GOLGB1	GOLGB1-201	ENST00000340645.9	protein_coding	GOLGB1	protein_coding	0.265099	0.21457	0.24728	0.177956	0.108409	0.0739917	0.126971	1	0.000240427	1	FALSE	0.123102	0.123102
GPBP1	GPBP1-202	ENST00000309096.4	retained_intron	GPBP1	protein_coding	0.194813	0.178526	0.184641	0.191839	0.170285	0.114932	0.136274	1	0.000165173	1	FALSE	0.0469578	0.0469578
GPC5	GPC5-204	ENST00000618596.1	protein_coding	GPC5	protein_coding	0	0.262168	0	0	0.174595	0.238875	0.2343	0	0.039744	0.00729776	TRUE	-0.150381		-0.150381
GPR137	GPR137-202	ENST00000377702.8	protein_coding	GPR137	protein_coding	0.0981086	0	0	0	0.112302	0.139035	0.142169	1	5.46188e-06	1	FALSE	-0.106642	0.110158	-0.106642
GPR137	GPR137-204	ENST00000438980.7	protein_coding	GPR137	protein_coding	0.357854	0.325817	0.352508	0.39513	0.242834	0.266792	0.233382	1	5.46188e-06	1	FALSE	0.110158	0.110158	-0.106642
GPR137	GPR137-218	ENST00000546139.5	protein_coding	GPR137	protein_coding	0.0734035	0.130342	0.0524387	0.044009	0.0192926	0.0319974	0.0395242	1	5.46188e-06	1	FALSE	0.0447769	0.110158	-0.106642
GPR162	GPR162-202	ENST00000382315.7	protein_coding	GPR162	protein_coding	0	0	0.236348	0	0.463386	0.545092	0.365364	1	8.72326e-05	0.000203928	TRUE	-0.39886	0.265415	-0.39886
GPR162	GPR162-203	ENST00000428545.6	protein_coding	GPR162	protein_coding	0.249269	0.3848	0.346071	0.217344	0	0	0.101869	1	8.72326e-05	0.061999	FALSE	0.265415	0.265415	-0.39886
GPR85	GPR85-202	ENST00000424100.1	protein_coding	GPR85	protein_coding	0	0	0.364757	0.92005	0.604973	1	1	0	0.0231823	0.0215215	TRUE	-0.547123		-0.547123
GPR89B	GPR89B-205	ENST00000488165.5	nonsense_mediated_decay	GPR89B	protein_coding	0	0	0	0.0792662	0.18437	0.22605	0.119933	1	0.0089419	1	FALSE	-0.156968		-0.156968
GRAP2	GRAP2-201	ENST00000344138.9	protein_coding	GRAP2	protein_coding	0.581833	0.46734	0.340044	0.513058	0.216719	0.168185	0.262901	1	0.0165383	0.895315	FALSE	0.259634	0.259634	-0.297982
GRAP2	GRAP2-204	ENST00000460449.1	retained_intron	GRAP2	protein_coding	0	0	0.283389	0	0.283827	0.435812	0.38685	1	0.0165383	0.0067165	TRUE	-0.297982	0.259634	-0.297982
GRB10	GRB10-201	ENST00000335866.7	protein_coding	GRB10	protein_coding	0.0907613	0.0858021	0.0596682	0.0639491	0.0389727	0.04217	0.0538092	1	0.00221462	1	FALSE	0.0300612	0.0300612	-0.0756078
GRB10	GRB10-223	ENST00000644716.1	processed_transcript	GRB10	protein_coding	0	0	0.0185526	0.0508393	0.0798594	0.128647	0.0703613	1	0.00221462	1	FALSE	-0.0756078	0.0300612	-0.0756078
GREB1	GREB1-203	ENST00000381483.6	protein_coding	GREB1	protein_coding	0.104701	0.0933621	0.0901878	0.0884106	0.0748433	0.0722162	0.0852543	1	0.00081176	1	FALSE	0.0167274	0.0370702
GREB1	GREB1-209	ENST00000472040.1	retained_intron	GREB1	protein_coding	0.061079	0.0595028	0.050998	0.0227389	0.00759832	0.0061869	0.0207433	1	0.00081176	1	FALSE	0.0370702	0.0370702
GRIA3	GRIA3-203	ENST00000479118.1	processed_transcript	GRIA3	protein_coding	0.16359	0.0974002	0.151769	0.281942	0	0	0.0640506	1	5.73605e-06	0.309146	FALSE	0.152325	0.193589	-0.425105
GRIA3	GRIA3-204	ENST00000541091.5	protein_coding	GRIA3	protein_coding	0.143131	0.189262	0.117765	0	0.721096	0.51676	0.375077	1	5.73605e-06	0.000267912	TRUE	-0.425105	0.193589	-0.425105
GRIA3	GRIA3-208	ENST00000620581.4	protein_coding	GRIA3	protein_coding	0.167481	0.140012	0.242209	0.224652	0	0	0	1	5.73605e-06	1	FALSE	0.193589	0.193589	-0.425105
GRM2	GRM2-205	ENST00000464585.1	retained_intron	GRM2	protein_coding	0.760934	0.733137	0.775769	0.602691	0.372082	0.396749	0.294908	1	1.36517e-05	0.0359188	TRUE	0.363553	0.363553	-0.354034
GRM2	GRM2-207	ENST00000477330.5	processed_transcript	GRM2	protein_coding	0	0	0	0	0.285185	0.352158	0.42476	1	1.36517e-05	1	FALSE	-0.354034	0.363553	-0.354034
GSN	GSN-204	ENST00000373818.8	protein_coding	GSN	protein_coding	0.74639	0.756672	0.72077	0.517345	0.415427	0.308267	0.62185	0	0.0312098	0.00632352	TRUE	0.23678	0.23678	-0.228242
GSN	GSN-207	ENST00000432226.7	protein_coding	GSN	protein_coding	0.216684	0.198987	0.246971	0.390658	0.521418	0.615322	0.337962	0	0.0312098	0.00911781	TRUE	-0.228242	0.23678	-0.228242
GSTK1	GSTK1-201	ENST00000358406.10	protein_coding	GSTK1	protein_coding	0.436534	0.482352	0.361533	0.35298	0.224038	0.284213	0.209571	1	7.39264e-06	0.00378975	TRUE	0.169076	0.169076	-0.110361
GSTK1	GSTK1-204	ENST00000442394.5	nonsense_mediated_decay	GSTK1	protein_coding	0.00826491	0.0201302	0	0.0425821	0.136821	0.137696	0.0864037	1	7.39264e-06	1	FALSE	-0.102562	0.169076	-0.110361
GSTK1	GSTK1-208	ENST00000489654.1	retained_intron	GSTK1	protein_coding	0.160808	0.132727	0.192401	0.179297	0.303951	0.323592	0.202465	1	7.39264e-06	1	FALSE	-0.110361	0.169076	-0.110361
GSTM3	GSTM3-201	ENST00000256594.7	protein_coding	GSTM3	protein_coding	0.163796	0.171862	0.158331	0.13429	0.256529	0.226359	0.210507	1	0.0482758	1	FALSE	-0.0740616		-0.0740616
GTF2E2	GTF2E2-201	ENST00000355904.9	protein_coding	GTF2E2	protein_coding	0.639226	0.684867	0.648427	0.70358	0.619587	0.597104	0.592357	1	0.000645896	1	FALSE	0.0660092	0.0660092	-0.120716
GTF2E2	GTF2E2-202	ENST00000518445.1	protein_coding	GTF2E2	protein_coding	0	0	0.0460445	0	0.111569	0.203943	0.0811699	1	0.000645896	1	FALSE	-0.120716	0.0660092	-0.120716
GTF2F1	GTF2F1-205	ENST00000595047.5	protein_coding	GTF2F1	protein_coding	0.133827	0.147666	0.0900375	0.141338	0.269441	0.218874	0.190189	1	0.0185078	1	FALSE	-0.0979509	0.184271	-0.0979509
GTF2F1	GTF2F1-206	ENST00000598607.1	protein_coding	GTF2F1	protein_coding	0.36174	0.183895	0.367541	0.391573	0.237078	0	0.188671	0	0.0185078	0.00303747	TRUE	0.184271	0.184271	-0.0979509
GTF3C1	GTF3C1-201	ENST00000356183.9	protein_coding	GTF3C1	protein_coding	0.323782	0.335482	0.429457	0.389537	0.176288	0.272283	0.250626	1	0.0131876	1	FALSE	0.136499	0.136499	-0.124831
GTF3C1	GTF3C1-202	ENST00000561623.5	protein_coding	GTF3C1	protein_coding	0.182062	0.226582	0.185959	0.219903	0.338421	0.329875	0.317078	1	0.0131876	1	FALSE	-0.124831	0.136499	-0.124831
GTPBP2	GTPBP2-201	ENST00000307114.11	protein_coding	GTPBP2	protein_coding	0.0513022	0.174421	0.0472022	0.313897	0	0	0.1208	0	0.031379	0.0192946	TRUE	0.106439	0.106439
GTPBP2	GTPBP2-204	ENST00000432918.5	protein_coding	GTPBP2	protein_coding	0.0935532	0.0870916	0.0723533	0.0611411	0.0477877	0.0504919	0.0566762	1	0.031379	1	FALSE	0.0268829	0.106439
GTPBP2	GTPBP2-209	ENST00000480263.1	processed_transcript	GTPBP2	protein_coding	0.255519	0.267407	0.214745	0.225919	0.117822	0.129159	0.197299	1	0.031379	1	FALSE	0.0928042	0.106439
GTSE1	GTSE1-202	ENST00000466510.5	retained_intron	GTSE1	protein_coding	0.553562	0.732619	0.286735	0.357762	0.143804	0.0899262	0.151589	1	0.00310041	0.00195618	TRUE	0.35423	0.35423	-0.10862
GTSE1	GTSE1-203	ENST00000479645.1	retained_intron	GTSE1	protein_coding	0	0	0	0.0790092	0.166642	0.11702	0.101454	1	0.00310041	1	FALSE	-0.10862	0.35423	-0.10862
GTSE1	GTSE1-204	ENST00000491863.1	retained_intron	GTSE1	protein_coding	0.135799	0	0.0600698	0.0935153	0.160029	0.187322	0.152746	1	0.00310041	1	FALSE	-0.0943529	0.35423	-0.10862
GUSB	GUSB-201	ENST00000304895.9	protein_coding	GUSB	protein_coding	0.448742	0.646125	0.373825	0.357881	0.230428	0.275472	0.285807	1	0.0355291	0.342642	FALSE	0.192741	0.192741	-0.11044
GUSB	GUSB-207	ENST00000462371.1	retained_intron	GUSB	protein_coding	0.0184327	0	0	0.0261968	0.0413454	0.0655792	0.0707085	1	0.0355291	1	FALSE	-0.0480537	0.192741	-0.11044
GUSB	GUSB-212	ENST00000478118.1	processed_transcript	GUSB	protein_coding	0.0580195	0.0231913	0.0394843	0.0747867	0.16453	0.113435	0.199968	1	0.0355291	1	FALSE	-0.11044	0.192741	-0.11044
H2AJ	H2AJ-201	ENST00000389078.3	nonsense_mediated_decay	H2AJ	protein_coding	0.0216598	0.0406095	0	0	0.130395	0.0769104	0.0637911	1	0.013462	1	FALSE	-0.0747981	0.139075	-0.0747981
H2AJ	H2AJ-202	ENST00000501744.2	nonsense_mediated_decay	H2AJ	protein_coding	0.07315	0.0513286	0.0930828	0.0919959	0.137103	0.150652	0.137243	1	0.013462	1	FALSE	-0.0642766	0.139075	-0.0747981
H2AJ	H2AJ-203	ENST00000544848.2	protein_coding	H2AJ	protein_coding	0.90519	0.908062	0.906917	0.908004	0.732503	0.772438	0.798966	1	0.013462	1	FALSE	0.139075	0.139075	-0.0747981
H2AX	H2AX-201	ENST00000375167.1	nonsense_mediated_decay	H2AX	protein_coding	0.194087	0.220401	0.273775	0.21711	0.511259	0.569533	0.384401	1	0.00107666	0	TRUE	-0.262054	0.262054	-0.262054
H2AX	H2AX-202	ENST00000530167.1	protein_coding	H2AX	protein_coding	0.805913	0.779599	0.726225	0.78289	0.488741	0.430467	0.615599	1	0.00107666	0	TRUE	0.262054	0.262054	-0.262054
H2AZ1-DT	H2AZ1-DT-201	ENST00000501976.7	lncRNA	H2AZ1-DT	lncRNA	0.132477	0.268437	0.129691	0.0726384	0.0681063	0.0520259	0	1	0.00525799	1	FALSE	0.110767	0.15594	-0.134846
H2AZ1-DT	H2AZ1-DT-202	ENST00000507494.6	lncRNA	H2AZ1-DT	lncRNA	0.0353051	0.0263175	0.0869036	0.09824	0.122432	0.264851	0.202331	1	0.00525799	1	FALSE	-0.134846	0.15594	-0.134846
H2AZ1-DT	H2AZ1-DT-205	ENST00000666876.1	lncRNA	H2AZ1-DT	lncRNA	0.832218	0.705245	0.735118	0.675786	0.588821	0.493075	0.661561	1	0.00525799	1	FALSE	0.15594	0.15594	-0.134846
H2BW2	H2BW2-202	ENST00000417637.1	protein_coding	H2BW2	protein_coding	0.478474	0.519017	0	0.715255	0	0.138249	0	0	0.000481623	0.0177535	TRUE	0.382104	0.382104	-0.615445
H2BW2	H2BW2-203	ENST00000675318.2	protein_coding	H2BW2	protein_coding	0	0	0.495917	0	0.680098	0.675905	0.862269	1	0.000481623	0.000172878	TRUE	-0.615445	0.382104	-0.615445
HADHA	HADHA-201	ENST00000380649.8	protein_coding	HADHA	protein_coding	0.596154	0.554957	0.52434	0.3654	0.148488	0.257494	0.372849	0	7.31997e-05	8.49258e-05	TRUE	0.250602	0.250602	-0.164265
HADHA	HADHA-203	ENST00000471743.2	retained_intron	HADHA	protein_coding	0.0542391	0.0652109	0.0680967	0.0827148	0.08993	0.0965808	0.0922581	1	7.31997e-05	1	FALSE	-0.0253576	0.250602	-0.164265
HADHA	HADHA-207	ENST00000643233.1	nonsense_mediated_decay	HADHA	protein_coding	0.122729	0.210867	0.17306	0.274706	0.466248	0.33134	0.281229	1	7.31997e-05	0.0448098	TRUE	-0.164265	0.250602	-0.164265
HAGH	HAGH-204	ENST00000564445.5	protein_coding	HAGH	protein_coding	0	0.193806	0	0	0.182813	0.217124	0.0686633	0	0.0364234	0.000743445	TRUE	-0.107749		-0.107749
HAPLN2	HAPLN2-201	ENST00000255039.6	protein_coding	HAPLN2	protein_coding	0.592335	0.335377	0.757433	0.747421	0.11623	0.265316	0.262032	1	0.0366361	0.36471	FALSE	0.393615	0.393615	-0.207802
HAPLN2	HAPLN2-203	ENST00000482204.1	processed_transcript	HAPLN2	protein_coding	0	0	0	0	0.14379	0.180059	0.299557	1	0.0366361	1	FALSE	-0.207802	0.393615	-0.207802
HAUS5	HAUS5-201	ENST00000203166.10	protein_coding	HAUS5	protein_coding	0.797167	0.662127	0.656586	0.683844	0.377311	0.414096	0.601539	1	4.4991e-05	0.624538	FALSE	0.235616	0.235616	-0.211505
HAUS5	HAUS5-206	ENST00000587439.5	nonsense_mediated_decay	HAUS5	protein_coding	0	0	0.178867	0	0.295352	0.281913	0.191402	1	4.4991e-05	0.000190421	TRUE	-0.211505	0.235616	-0.211505
HCFC2	HCFC2-201	ENST00000229330.9	protein_coding	HCFC2	protein_coding	0.545853	0.604082	0.584272	0.608627	0.35916	0.374264	0.509637	1	0.0120003	0.75784	FALSE	0.171355	0.171355	-0.175084
HCFC2	HCFC2-202	ENST00000544223.6	nonsense_mediated_decay	HCFC2	protein_coding	0	0.0975804	0.0681518	0	0.20544	0.336472	0.107639	1	0.0120003	0.000265104	TRUE	-0.175084	0.171355	-0.175084
HCG20	HCG20-207	ENST00000422944.1	lncRNA	HCG20	lncRNA	0.940071	0.927027	0.777865	0.336638	0.211833	0	0.230537	1	0.000797521	0.00313929	TRUE	0.597944	0.597944	-0.60805
HCG20	HCG20-209	ENST00000656751.1	lncRNA	HCG20	lncRNA	0	0	0.222135	0.663362	0.788167	0.930642	0.769463	1	0.000797521	0.000498436	TRUE	-0.60805	0.597944	-0.60805
HDAC10	HDAC10-201	ENST00000216271.10	protein_coding	HDAC10	protein_coding	0.121482	0.186015	0.211142	0.173248	0	0.0792364	0	1	0.00341081	1	FALSE	0.14656	0.14656
HDAC10	HDAC10-219	ENST00000497483.1	processed_transcript	HDAC10	protein_coding	0.174884	0.159452	0.147283	0.110522	0	0	0.101577	1	0.00341081	1	FALSE	0.114176	0.14656
HDAC4-AS1	HDAC4-AS1-203	ENST00000428471.1	lncRNA	HDAC4-AS1	lncRNA	0.584658	0.632144	0.709816	1	0.316937	0.376488	0	1	0.015984	0.0203576	TRUE	0.500513	0.500513
HDAC5	HDAC5-204	ENST00000586802.5	protein_coding	HDAC5	protein_coding	0.414894	0.404393	0.367361	0.436605	0.445042	0.518672	0.439347	1	0.00257392	1	FALSE	-0.061874	0.0270921	-0.0806834
HDAC5	HDAC5-208	ENST00000588419.1	retained_intron	HDAC5	protein_coding	0	0	0	0.0300779	0.142207	0.0783279	0.0440733	1	0.00257392	1	FALSE	-0.0806834	0.0270921	-0.0806834
HDAC5	HDAC5-211	ENST00000592385.5	retained_intron	HDAC5	protein_coding	0.0807243	0.0795532	0.0558874	0.069624	0.0359095	0.0439088	0.053247	1	0.00257392	1	FALSE	0.0270921	0.0270921	-0.0806834
HDAC6	HDAC6-204	ENST00000376643.6	protein_coding	HDAC6	protein_coding	0.0470173	0	0.0611267	0	0.25281	0.311381	0.144484	1	8.57383e-06	4.24851e-07	TRUE	-0.209189	0.0791518	-0.209189
HDAC6	HDAC6-223	ENST00000483506.1	retained_intron	HDAC6	protein_coding	0.267408	0.228587	0.231044	0.227062	0.161676	0.142062	0.174383	1	8.57383e-06	1	FALSE	0.0791518	0.0791518	-0.209189
HDAC6	HDAC6-228	ENST00000488543.1	retained_intron	HDAC6	protein_coding	0.140989	0.146571	0.136632	0.208007	0.10018	0.107004	0.130295	1	8.57383e-06	1	FALSE	0.0455565	0.0791518	-0.209189
HECTD4	HECTD4-203	ENST00000547085.1	retained_intron	HECTD4	protein_coding	0.0562397	0.0652114	0.0504623	0.0410345	0.0338206	0.0332642	0.0358579	1	0.000161346	1	FALSE	0.0189227	0.0189227	-0.0761197
HECTD4	HECTD4-209	ENST00000549141.1	processed_transcript	HECTD4	protein_coding	0	0	0.0331114	0	0.0612901	0.148405	0.0434978	1	0.000161346	1	FALSE	-0.0761197	0.0189227	-0.0761197
HELZ2	HELZ2-205	ENST00000478861.1	processed_transcript	HELZ2	protein_coding	0.119844	0	0	0	0.258903	0.405217	0.168949	1	6.38759e-08	4.58422e-11	TRUE	-0.247728		-0.247728
HEMK1	HEMK1-201	ENST00000232854.9	protein_coding	HEMK1	protein_coding	0.269825	0.250637	0.28799	0.181025	0.390259	0.428326	0.362544	1	2.24691e-06	1	FALSE	-0.14634	0.171439	-0.14634
HEMK1	HEMK1-205	ENST00000448997.5	nonsense_mediated_decay	HEMK1	protein_coding	0.0655131	0.12294	0.117447	0.12749	0.0194782	0.0341914	0	1	2.24691e-06	1	FALSE	0.0904576	0.171439	-0.14634
HEMK1	HEMK1-206	ENST00000455834.5	protein_coding	HEMK1	protein_coding	0.285998	0.268543	0.175921	0.227212	0.0570427	0	0.146898	1	2.24691e-06	2.62649e-05	TRUE	0.171439	0.171439	-0.14634
HEMK1	HEMK1-207	ENST00000482974.1	retained_intron	HEMK1	protein_coding	0.378664	0.357881	0.418642	0.464272	0.53322	0.537483	0.490559	1	2.24691e-06	1	FALSE	-0.115556	0.171439	-0.14634
HERC2P3	HERC2P3-207	ENST00000429926.1	retained_intron	HERC2P3	transcribed_unprocessed_pseudogene	0.0821572	0.0931228	0.0208843	0.0454746	0.00724931	0	0.0171959	1	0.000199573	1	FALSE	0.0522613	0.0522613	-0.0451315
HERC2P3	HERC2P3-211	ENST00000440774.1	processed_transcript	HERC2P3	transcribed_unprocessed_pseudogene	0.0561098	0.034788	0.0109808	0.0187513	0.0771175	0.0910257	0.0577237	1	0.000199573	1	FALSE	-0.0451315	0.0522613	-0.0451315
HERC4	HERC4-202	ENST00000373700.9	protein_coding	HERC4	protein_coding	0.0881836	0.0760102	0.0679446	0.0825	0.0205474	0.01447	0.039201	1	8.48363e-06	1	FALSE	0.0539201	0.0539201	-0.0571684
HERC4	HERC4-206	ENST00000427635.6	nonsense_mediated_decay	HERC4	protein_coding	0.0828532	0.0895036	0.0826927	0.11077	0.171005	0.160315	0.114549	1	8.48363e-06	1	FALSE	-0.0571684	0.0539201	-0.0571684
HERC5	HERC5-201	ENST00000264350.8	protein_coding	HERC5	protein_coding	0.917309	0.946926	0.886728	0.919596	0.745812	0.715325	0.739599	1	6.39206e-09	4.75803e-05	TRUE	0.184061	0.184061	-0.198839
HERC5	HERC5-203	ENST00000508159.1	protein_coding	HERC5	protein_coding	0	0	0.0677121	0	0.228838	0.237394	0.181068	1	6.39206e-09	1.7024e-11	TRUE	-0.198839	0.184061	-0.198839
HES4	HES4-201	ENST00000304952.11	protein_coding	HES4	protein_coding	0	0.0723514	0	0	0.334309	0.512684	0.409747	1	0.00793444	0.000579652	TRUE	-0.400826		-0.400826
HEXB	HEXB-201	ENST00000261416.12	protein_coding	HEXB	protein_coding	0.634747	0.55167	0.576095	0.555248	0.362674	0.406241	0.498987	1	3.33559e-06	1	FALSE	0.156806	0.156806	-0.256375
HEXB	HEXB-211	ENST00000513539.1	processed_transcript	HEXB	protein_coding	0	0	0.0415055	0.115274	0.424684	0.342254	0.119772	1	3.33559e-06	8.35912e-07	TRUE	-0.256375	0.156806	-0.256375
HEXD	HEXD-212	ENST00000582429.5	nonsense_mediated_decay	HEXD	protein_coding	0.106561	0.139597	0.0926088	0.131209	0.157732	0.145598	0.157633	1	0.0125735	1	FALSE	-0.0361604		-0.0674018
HEXD	HEXD-214	ENST00000583978.5	retained_intron	HEXD	protein_coding	0.0951561	0.0575647	0.106049	0.0922067	0.198362	0.160614	0.106462	1	0.0125735	1	FALSE	-0.0674018		-0.0674018
HGF	HGF-210	ENST00000465234.2	protein_coding	HGF	protein_coding	0.0169931	0	0	0	0.348554	0.16657	0.0969459	1	0.000184843	0.00141126	TRUE	-0.199775		-0.199775
HIC1	HIC1-205	ENST00000574370.1	protein_coding	HIC1	protein_coding	0.0133199	0.017845	0.037429	0.0247547	0.149541	0.149552	0.0978968	1	0.0228617	1	FALSE	-0.108993		-0.108993
HIGD1A	HIGD1A-201	ENST00000321331.12	protein_coding	HIGD1A	protein_coding	0.187298	0.154147	0.149027	0.172807	0.143336	0.10993	0.12367	1	1.61482e-05	1	FALSE	0.0401742	0.194321
HIGD1A	HIGD1A-203	ENST00000430190.5	protein_coding	HIGD1A	protein_coding	0.389149	0.261199	0.347631	0.213906	0	0	0.325951	0	1.61482e-05	2.11837e-07	TRUE	0.194321	0.194321
HILPDA	HILPDA-202	ENST00000435296.2	protein_coding	HILPDA	protein_coding	0.227625	0	0.0986547	0.0760954	0.351256	0.275265	0.193649	0	0.0481718	0.0133961	TRUE	-0.172796		-0.172796
HIPK2	HIPK2-201	ENST00000342645.7	protein_coding	HIPK2	protein_coding	0.175507	0.129656	0.243546	0.293885	0.419437	0.34435	0.303416	1	0.0482847	1	FALSE	-0.145086	0.165304	-0.145086
HIPK2	HIPK2-202	ENST00000406875.8	protein_coding	HIPK2	protein_coding	0.68973	0.755834	0.590697	0.585174	0.42172	0.474398	0.574047	1	0.0482847	0.0225635	TRUE	0.165304	0.165304	-0.145086
HLA-C	HLA-C-201	ENST00000376228.9	protein_coding	HLA-C	protein_coding	0.944225	0.958844	0.963279	0.959896	1	0.926173	1	0	0.0393588	0	TRUE	-0.0188302	0.0188302	-0.0188302
HLA-C	HLA-C-207	ENST00000484378.1	retained_intron	HLA-C	protein_coding	0.0557754	0.0411559	0.0367212	0.0401036	0	0.0738265	0	0	0.0393588	0	TRUE	0.0188302	0.0188302	-0.0188302
HLA-DPA1	HLA-DPA1-246	ENST00000476642.5	processed_transcript	HLA-DPA1	protein_coding	0.0343489	0	0	0	0.365511	0.14125	0.0580085	1	0.00115859	9.12436e-05	TRUE	-0.179669		-0.179669
HLTF	HLTF-202	ENST00000392912.6	protein_coding	HLTF	protein_coding	0.0803415	0.118767	0.131972	0.162455	0.25942	0.272241	0.180183	1	0.0300057	1	FALSE	-0.113897		-0.113897
HMBOX1	HMBOX1-205	ENST00000518080.2	processed_transcript	HMBOX1	protein_coding	0.0122621	0.0223404	0.011982	0.037141	0.0502439	0.0695881	0.0605821	1	0.0176737	1	FALSE	-0.0392067		-0.0392067
HMGB1P5	HMGB1P5-201	ENST00000255320.6	transcribed_processed_pseudogene	HMGB1P5	transcribed_processed_pseudogene	0.95169	0.926699	0.914142	0.975562	0.569931	0.509922	0.860714	1	0.0149567	0	TRUE	0.295167	0.295167	-0.295167
HMGB1P5	HMGB1P5-202	ENST00000451497.1	processed_transcript	HMGB1P5	transcribed_processed_pseudogene	0.0483102	0.0733007	0.0858581	0.0244384	0.430069	0.490078	0.139286	1	0.0149567	0	TRUE	-0.295167	0.295167	-0.295167
HMGB3	HMGB3-203	ENST00000430118.1	protein_coding	HMGB3	protein_coding	0.740334	0.706627	0.531905	0.716848	0.474521	0.346636	0.272982	1	0.00176881	0.00468615	TRUE	0.309216	0.309216	-0.310147
HMGB3	HMGB3-205	ENST00000455596.5	protein_coding	HMGB3	protein_coding	0.115036	0	0.150456	0.0765096	0.308647	0.3901	0.488194	1	0.00176881	0.000263042	TRUE	-0.310147	0.309216	-0.310147
HMGN1	HMGN1-204	ENST00000380749.10	protein_coding	HMGN1	protein_coding	0.734756	0.734647	0.707429	0.676032	0.575261	0.646356	0.62524	1	0.00871234	1	FALSE	0.097597	0.097597	-0.0602334
HMGN1	HMGN1-206	ENST00000431390.5	nonsense_mediated_decay	HMGN1	protein_coding	0.0275946	0.0086689	0.0251013	0.0158273	0.0929445	0.0760218	0.0696281	1	0.00871234	1	FALSE	-0.0602334	0.097597	-0.0602334
HNMT	HNMT-203	ENST00000329366.8	protein_coding	HNMT	protein_coding	0.0883024	0.0704639	0.080551	0.0770677	0.0336603	0.0504566	0.0520763	1	0.00063738	1	FALSE	0.0336985	0.105112	-0.116669
HNMT	HNMT-204	ENST00000410115.5	protein_coding	HNMT	protein_coding	0.21777	0.252478	0.204831	0.198519	0.164222	0.101344	0.0742968	1	0.00063738	1	FALSE	0.105112	0.105112	-0.116669
HNMT	HNMT-205	ENST00000467390.5	processed_transcript	HNMT	protein_coding	0.0294646	0	0.0378702	0	0.0574266	0.176901	0.16618	1	0.00063738	1	FALSE	-0.116669	0.105112	-0.116669
HNRNPA1	HNRNPA1-201	ENST00000330752.12	protein_coding	HNRNPA1	protein_coding	0.121955	0.124576	0.156407	0.12299	0.161397	0.264874	0.168531	1	0.00427882	1	FALSE	-0.0667854		-0.0667854
HNRNPC	HNRNPC-203	ENST00000430246.6	protein_coding	HNRNPC	protein_coding	0.099344	0.103156	0.0891801	0.100213	0.12962	0.124219	0.126018	1	1.56562e-06	1	FALSE	-0.0286456		-0.146292
HNRNPC	HNRNPC-230	ENST00000557201.5	protein_coding	HNRNPC	protein_coding	0.176974	0.202556	0.145947	0.105561	0.299523	0.335111	0.27752	1	1.56562e-06	1	FALSE	-0.146292		-0.146292
HNRNPD	HNRNPD-202	ENST00000352301.8	protein_coding	HNRNPD	protein_coding	0.209209	0.209679	0.248217	0.233958	0.102415	0.0868593	0.192338	1	0.0351519	1	FALSE	0.098062	0.098062	-0.132968
HNRNPD	HNRNPD-208	ENST00000509263.5	protein_coding	HNRNPD	protein_coding	0.295771	0.315929	0.235924	0.302462	0.514143	0.419446	0.327881	1	0.0351519	1	FALSE	-0.132968	0.098062	-0.132968
HNRNPDL	HNRNPDL-201	ENST00000295470.9	protein_coding	HNRNPDL	protein_coding	0.104088	0.0918255	0.0827302	0.0888245	0	0	0.0672792	1	4.39121e-06	1	FALSE	0.0694405	0.0694405
HNRNPH3	HNRNPH3-201	ENST00000265866.11	protein_coding	HNRNPH3	protein_coding	0.496603	0.474011	0.532763	0.513271	0.378803	0.359485	0.409743	1	0.000220195	1	FALSE	0.121485	0.121485	-0.0743305
HNRNPH3	HNRNPH3-202	ENST00000354695.5	protein_coding	HNRNPH3	protein_coding	0.0412939	0.00706648	0.051635	0	0.105079	0.0993064	0.0936031	1	0.000220195	1	FALSE	-0.0743305	0.121485	-0.0743305
HNRNPU	HNRNPU-203	ENST00000366527.4	retained_intron	HNRNPU	protein_coding	0.0909469	0.0961095	0.069708	0.072701	0.0308304	0.0388071	0.0610153	1	0.00332637	1	FALSE	0.0388154	0.0670913	-0.0573998
HNRNPU	HNRNPU-204	ENST00000440865.2	protein_coding	HNRNPU	protein_coding	0.288062	0.333759	0.301954	0.304693	0.215014	0.221982	0.283081	1	0.00332637	1	FALSE	0.0670913	0.0670913	-0.0573998
HNRNPU	HNRNPU-228	ENST00000640306.1	nonsense_mediated_decay	HNRNPU	protein_coding	0.0546081	0	0.0476418	0.0535212	0.132371	0.0906291	0.0660279	1	0.00332637	1	FALSE	-0.0573998	0.0670913	-0.0573998
HOOK3	HOOK3-201	ENST00000307602.9	protein_coding	HOOK3	protein_coding	0.71224	0.768029	0.684931	0.76422	0.559222	0.416777	0.647317	1	0.00996229	0.167744	FALSE	0.19125	0.19125	-0.129195
HOOK3	HOOK3-206	ENST00000533539.1	protein_coding	HOOK3	protein_coding	0	0	0.0158276	0.0713781	0.153197	0.227634	0.0721593	1	0.00996229	1	FALSE	-0.129195	0.19125	-0.129195
HOPX	HOPX-201	ENST00000317745.11	protein_coding	HOPX	protein_coding	0.472249	0.301256	0.297492	0.184629	0.0589251	0.0322001	0.213677	0	2.94445e-07	0.0205683	TRUE	0.212306	0.212306	-0.351031
HOPX	HOPX-210	ENST00000553379.6	protein_coding	HOPX	protein_coding	0	0	0	0.143987	0.568559	0.419889	0.172636	1	2.94445e-07	2.7389e-10	TRUE	-0.351031	0.212306	-0.351031
HOXC4	HOXC4-201	ENST00000303406.4	protein_coding	HOXC4	protein_coding	0.283762	0.244092	0.24534	0.305351	0	0.0721833	0	1	0.000127127	5.36775e-06	TRUE	0.245575	0.245575	-0.176573
HOXC4	HOXC4-203	ENST00000507650.1	processed_transcript	HOXC4	protein_coding	0.325668	0.228327	0.562329	0.488133	0.565588	0.601526	0.565947	1	0.000127127	0.42525	FALSE	-0.176573	0.245575	-0.176573
HOXC9	HOXC9-201	ENST00000303450.5	protein_coding	HOXC9	protein_coding	0.542126	0	0.383755	0.217305	0.787136	1	1	1	0.000455981	0	TRUE	-0.643249	0.643249	-0.643249
HOXC9	HOXC9-203	ENST00000508190.1	protein_coding	HOXC9	protein_coding	0.457874	1	0.616245	0.782695	0.212864	0	0	1	0.000455981	0	TRUE	0.643249	0.643249	-0.643249
HP1BP3	HP1BP3-208	ENST00000424732.5	protein_coding	HP1BP3	protein_coding	0.1563	0.147178	0.11536	0.109735	0.167911	0.170616	0.168228	1	0.00451355	1	FALSE	-0.0367749		-0.0770071
HP1BP3	HP1BP3-213	ENST00000488722.5	processed_transcript	HP1BP3	protein_coding	0	0.0343673	0.0059772	0.0113103	0.0814263	0.150529	0.0378073	1	0.00451355	1	FALSE	-0.0770071		-0.0770071
HPCAL1	HPCAL1-206	ENST00000613496.4	protein_coding	HPCAL1	protein_coding	0.0729858	0.13657	0.182673	0.360727	0.0698657	0	0.0414782	1	0.00758201	0.00214023	TRUE	0.151124	0.151124	-0.115562
HPCAL1	HPCAL1-207	ENST00000620771.4	protein_coding	HPCAL1	protein_coding	0.121006	0.137424	0.189423	0.143681	0.21271	0.269838	0.307789	1	0.00758201	1	FALSE	-0.115562	0.151124	-0.115562
HROB	HROB-202	ENST00000319977.8	protein_coding	HROB	protein_coding	0	0	0	0	0.111847	0.149526	0.429542	1	0.0236939	1	FALSE	-0.230305		-0.230305
HS1BP3	HS1BP3-201	ENST00000304031.8	protein_coding	HS1BP3	protein_coding	0.477968	0.557802	0.44213	0.449999	0.371525	0.401092	0.353204	1	3.46621e-05	1	FALSE	0.106701	0.106701	-0.105938
HS1BP3	HS1BP3-206	ENST00000446825.1	protein_coding	HS1BP3	protein_coding	0.0360055	0	0	0	0.112959	0.0826052	0.149254	1	3.46621e-05	1	FALSE	-0.105938	0.106701	-0.105938
HSD17B4	HSD17B4-208	ENST00000508750.1	retained_intron	HSD17B4	protein_coding	0.0947111	0.0657057	0.103559	0.101733	0.0421543	0.0362759	0.0641068	1	0.000102894	1	FALSE	0.0439148	0.173514	-0.0610275
HSD17B4	HSD17B4-213	ENST00000510025.7	protein_coding	HSD17B4	protein_coding	0.408325	0.520683	0.366361	0.350084	0.217329	0.16112	0.335098	1	0.000102894	1	FALSE	0.173514	0.173514	-0.0610275
HSD17B4	HSD17B4-231	ENST00000645832.1	nonsense_mediated_decay	HSD17B4	protein_coding	0	0	0	0.00760129	0.0794341	0.0792129	0.0301365	1	0.000102894	1	FALSE	-0.0610275	0.173514	-0.0610275
HSF1	HSF1-208	ENST00000530661.1	nonsense_mediated_decay	HSF1	protein_coding	0	0.0623548	0.00969211	0.0386997	0.150199	0.0980738	0.101447	1	0.0259272	1	FALSE	-0.0888865		-0.0888865
HSPA12A	HSPA12A-201	ENST00000369209.8	protein_coding	HSPA12A	protein_coding	0.125005	0.0860252	0.0552981	0.0333038	0	0	0	1	0.000619453	1	FALSE	0.0749081	0.0749081
HSPA2	HSPA2-201	ENST00000247207.6	protein_coding	HSPA2	protein_coding	0.111485	0.0398706	0.614266	0.0754618	0.75969	0.828412	0.825894	1	3.85145e-05	0	TRUE	-0.594395	0.594395	-0.594395
HSPA2	HSPA2-202	ENST00000394709.2	protein_coding	HSPA2	protein_coding	0.888515	0.960129	0.385734	0.924538	0.24031	0.171588	0.174106	1	3.85145e-05	0	TRUE	0.594395	0.594395	-0.594395
HSPA4	HSPA4-201	ENST00000304858.7	protein_coding	HSPA4	protein_coding	0.694711	0.735967	0.659354	0.634992	0.3485	0.358346	0.504954	1	0.000102717	4.1253e-05	TRUE	0.277323	0.277323	-0.190262
HSPA4	HSPA4-203	ENST00000514825.1	retained_intron	HSPA4	protein_coding	0.0504592	0.0897622	0.0782945	0.0971434	0.353821	0.283981	0.169729	1	0.000102717	0.000479663	TRUE	-0.190262	0.277323	-0.190262
HSPA4	HSPA4-204	ENST00000615899.1	protein_coding	HSPA4	protein_coding	0.199379	0.174271	0.213421	0.203726	0.290611	0.351268	0.311984	1	0.000102717	1	FALSE	-0.120255	0.277323	-0.190262
HSPH1	HSPH1-202	ENST00000380405.7	protein_coding	HSPH1	protein_coding	0.395625	0.336434	0.421996	0.391332	0.202952	0.22269	0.273771	1	0.0268097	1	FALSE	0.153209	0.153209	-0.161353
HSPH1	HSPH1-209	ENST00000630972.2	protein_coding	HSPH1	protein_coding	0.0672336	0.122345	0.1344	0.186742	0.358993	0.346655	0.161452	0	0.0268097	0.0352817	TRUE	-0.161353	0.153209	-0.161353
HTRA2	HTRA2-201	ENST00000258080.8	protein_coding	HTRA2	protein_coding	0.671751	0.671585	0.579768	0.717956	0.327656	0.209823	0.491597	1	0.0117837	0.175383	FALSE	0.31724	0.31724	-0.263703
HTRA2	HTRA2-204	ENST00000462909.5	processed_transcript	HTRA2	protein_coding	0.03292	0.0604597	0	0	0.223648	0.324738	0.312758	1	0.0117837	0.00143462	TRUE	-0.263703	0.31724	-0.263703
HYLS1	HYLS1-201	ENST00000356438.7	protein_coding	HYLS1	protein_coding	0.791595	0.959212	0.57025	0.593767	0.545577	0.291179	0.371119	1	0.0358655	0.0757647	FALSE	0.326081	0.326081	-0.160064
HYLS1	HYLS1-203	ENST00000526028.1	protein_coding	HYLS1	protein_coding	0	0.0407879	0	0.0909777	0.299938	0.151592	0.127485	1	0.0358655	0.0708977	FALSE	-0.160064	0.326081	-0.160064
ID2	ID2-201	ENST00000234091.8	protein_coding	ID2	protein_coding	0.0431813	0.00674896	0.0119616	0.0148757	0.12497	0.0657661	0.0439648	1	0.0165544	1	FALSE	-0.0590419	0.141716	-0.0590419
ID2	ID2-204	ENST00000472142.1	retained_intron	ID2	protein_coding	0.158849	0.15037	0.205543	0.164402	0	0.0842245	0	1	0.0165544	1	FALSE	0.141716	0.141716	-0.0590419
IDH3A	IDH3A-218	ENST00000560396.5	nonsense_mediated_decay	IDH3A	protein_coding	0.184016	0.0864397	0.135398	0.105202	0.0248333	0.0217902	0	1	3.75873e-05	1	FALSE	0.112223	0.112223
IDH3B	IDH3B-202	ENST00000380851.9	protein_coding	IDH3B	protein_coding	0	0	0.0331572	0	0.051717	0.100654	0.144224	1	0.0149171	1	FALSE	-0.0905757		-0.0905757
IDH3G	IDH3G-201	ENST00000217901.10	protein_coding	IDH3G	protein_coding	0.586574	0.611495	0.556042	0.582725	0.401291	0.338985	0.473618	1	0.047673	0.924787	FALSE	0.179578	0.179578
IDS	IDS-206	ENST00000466323.5	nonsense_mediated_decay	IDS	protein_coding	0.0859223	0.0493432	0.0532368	0.0666586	0.125643	0.133441	0.133744	1	0.0322473	1	FALSE	-0.0671524		-0.0671524
IFFO1	IFFO1-209	ENST00000488007.5	retained_intron	IFFO1	protein_coding	0.219883	0.196414	0.193593	0.228414	0.154023	0.152261	0.125829	1	0.000473925	1	FALSE	0.065538	0.065538	-0.133394
IFFO1	IFFO1-210	ENST00000619571.5	protein_coding	IFFO1	protein_coding	0	0.043678	0.0160622	0.045264	0.0977579	0.144116	0.237062	1	0.000473925	1	FALSE	-0.133394	0.065538	-0.133394
IFRD2	IFRD2-201	ENST00000414734.5	nonsense_mediated_decay	IFRD2	protein_coding	0.0529151	0.0644139	0.051063	0.0620367	0.106811	0.125154	0.0758163	1	0.0181799	1	FALSE	-0.0449866	0.172742	-0.133707
IFRD2	IFRD2-202	ENST00000417626.6	protein_coding	IFRD2	protein_coding	0.512004	0.627909	0.466927	0.586059	0.309233	0.429691	0.387524	1	0.0181799	1	FALSE	0.172742	0.172742	-0.133707
IFRD2	IFRD2-207	ENST00000464258.5	retained_intron	IFRD2	protein_coding	0.175045	0.052547	0.213951	0.0937606	0.337456	0.224645	0.2405	1	0.0181799	1	FALSE	-0.133707	0.172742	-0.133707
IFT122	IFT122-208	ENST00000502304.5	nonsense_mediated_decay	IFT122	protein_coding	0.236464	0.267093	0.215251	0.229345	0.113588	0.15614	0.169135	1	0.000480124	1	FALSE	0.0907505	0.0907505
IFT122	IFT122-221	ENST00000510524.5	nonsense_mediated_decay	IFT122	protein_coding	0.355062	0.266226	0.246782	0.270381	0.216609	0.196287	0.202806	1	0.000480124	1	FALSE	0.0793787	0.0907505
IFT20	IFT20-203	ENST00000395418.8	protein_coding	IFT20	protein_coding	0.235699	0.218323	0.142155	0.17035	0.0312802	0.0749216	0.105231	1	0.00479249	1	FALSE	0.121154	0.121154	-0.06291
IFT20	IFT20-212	ENST00000582797.5	retained_intron	IFT20	protein_coding	0.637333	0.646289	0.69434	0.703529	0.765547	0.712742	0.717462	1	0.00479249	1	FALSE	-0.0615444	0.121154	-0.06291
IFT20	IFT20-214	ENST00000585089.5	protein_coding	IFT20	protein_coding	0	0	0.0682892	0.0252717	0.0986074	0.0721431	0.0881501	1	0.00479249	1	FALSE	-0.06291	0.121154	-0.06291
IFT74	IFT74-204	ENST00000443698.5	protein_coding	IFT74	protein_coding	0	0	0	0.0957062	0.168227	0.133874	0.13363	1	0.0220049	1	FALSE	-0.121317		-0.121317
IFT81	IFT81-204	ENST00000549009.1	processed_transcript	IFT81	protein_coding	0.445386	0.465459	0.426636	0.519297	0.370585	0.263448	0.325079	1	0.0012205	1	FALSE	0.144491	0.144491	-0.200926
IFT81	IFT81-209	ENST00000552912.5	protein_coding	IFT81	protein_coding	0.186511	0.168497	0.1891	0.190808	0.33245	0.526066	0.295448	1	0.0012205	0.00018654	TRUE	-0.200926	0.144491	-0.200926
IGBP1	IGBP1-201	ENST00000342206.10	protein_coding	IGBP1	protein_coding	0	0.0197637	0.111936	0.117617	0.235533	0.140752	0.173714	1	0.0358615	0	TRUE	-0.121004	0.121004	-0.121004
IGBP1	IGBP1-202	ENST00000356413.5	protein_coding	IGBP1	protein_coding	1	0.980236	0.888064	0.882383	0.764467	0.859248	0.826286	1	0.0358615	0	TRUE	0.121004	0.121004	-0.121004
IGDCC4	IGDCC4-202	ENST00000558048.5	processed_transcript	IGDCC4	protein_coding	0.0708373	0.0232816	0.0438966	0.0287694	0.245637	0.121433	0.133129	1	0.0275271	1	FALSE	-0.125037		-0.125037
IGF1R	IGF1R-214	ENST00000560972.1	processed_transcript	IGF1R	protein_coding	0.154382	0.0818057	0.0912564	0.0929354	0	0	0.0768898	1	0.000339471	1	FALSE	0.0794651	0.0794651
IGSF22	IGSF22-203	ENST00000504981.5	retained_intron	IGSF22	protein_coding	0	0	0	0	0.160729	0.536363	0.236042	1	0.00404492	1	FALSE	-0.311045	0.491759	-0.311045
IGSF22	IGSF22-204	ENST00000510673.1	processed_transcript	IGSF22	protein_coding	0.366266	0.73482	0.511823	0.633743	0.209713	0	0	1	0.00404492	0.0874065	FALSE	0.491759	0.491759	-0.311045
IHO1	IHO1-202	ENST00000366429.2	protein_coding	IHO1	protein_coding	0.759689	0.816553	0.605383	0.711391	0.506564	0.326873	0.441571	1	0.00231292	0.000311112	TRUE	0.298252	0.298252	-0.208357
IHO1	IHO1-205	ENST00000493870.1	processed_transcript	IHO1	protein_coding	0.109777	0.0936221	0.353186	0.152826	0.28794	0.42922	0.43997	0	0.00231292	0.00700297	TRUE	-0.208357	0.298252	-0.208357
IKZF5	IKZF5-205	ENST00000617859.4	protein_coding	IKZF5	protein_coding	0.0783679	0.0381297	0	0.0350689	0.335366	0.265752	0.148792	1	0.0130361	0.00472487	TRUE	-0.212078		-0.212078
IL16	IL16-205	ENST00000558332.3	protein_coding	IL16	protein_coding	0.139692	0.102645	0.129447	0.108519	0.0245438	0.0198499	0.082918	1	0.000122171	1	FALSE	0.0776383	0.0811744	-0.292124
IL16	IL16-207	ENST00000559342.1	processed_transcript	IL16	protein_coding	0.0931376	0.0733437	0.0409512	0.117265	0	0	0	1	0.000122171	1	FALSE	0.0811744	0.0811744	-0.292124
IL16	IL16-213	ENST00000560989.1	processed_transcript	IL16	protein_coding	0.0127985	0.0214981	0.235995	0.465112	0.591115	0.557461	0.279348	0	0.000122171	0.00018748	TRUE	-0.292124	0.0811744	-0.292124
IL32	IL32-201	ENST00000008180.13	protein_coding	IL32	protein_coding	0.105391	0.153307	0.0565572	0.160335	0	0.04379	0.0497151	1	0.000150183	1	FALSE	0.0877292	0.0877292	-0.231296
IL32	IL32-211	ENST00000525643.7	protein_coding	IL32	protein_coding	0	0.209194	0.168646	0	0.240483	0.430285	0.3065	1	0.000150183	0.00069766	TRUE	-0.231296	0.0877292	-0.231296
ILF3	ILF3-203	ENST00000449870.5	protein_coding	ILF3	protein_coding	0.128867	0.127458	0.15014	0.126192	0.0858795	0.107458	0.0697813	1	0.0344364	1	FALSE	0.045458	0.045458
ILF3	ILF3-208	ENST00000587928.5	retained_intron	ILF3	protein_coding	0.158761	0.14977	0.154814	0.178823	0.11466	0.125341	0.141554	1	0.0344364	1	FALSE	0.0333572	0.045458
ILK	ILK-204	ENST00000524735.1	processed_transcript	ILK	protein_coding	0.1633	0.166218	0.168278	0.164591	0.112989	0.127711	0.159663	1	0.00612992	1	FALSE	0.0321427	0.0321427	-0.0620139
ILK	ILK-214	ENST00000534706.1	processed_transcript	ILK	protein_coding	0.0878927	0.0707702	0.0984107	0.0988752	0.126385	0.111758	0.21486	1	0.00612992	1	FALSE	-0.0620139	0.0321427	-0.0620139
ILKAP	ILKAP-206	ENST00000466468.5	retained_intron	ILKAP	protein_coding	0.204224	0.181606	0.190406	0.195874	0.159332	0.164567	0.16337	1	0.0321468	1	FALSE	0.0306048	0.0306048
IMPA2	IMPA2-201	ENST00000269159.8	protein_coding	IMPA2	protein_coding	0.244588	0.253499	0.249659	0.239002	0.101132	0.124651	0.164502	1	0.00104961	1	FALSE	0.116592	0.116592	-0.0465406
IMPA2	IMPA2-204	ENST00000588167.1	retained_intron	IMPA2	protein_coding	0.0674824	0.0511947	0.0682844	0.037257	0.0976295	0.0975918	0.112564	1	0.00104961	1	FALSE	-0.0465406	0.116592	-0.0465406
INAFM2	INAFM2-201	ENST00000560415.1	processed_transcript	INAFM2	protein_coding	0	0	0.0384924	0.0496178	0.343722	0.0638928	0.247474	1	0.0107861	0	TRUE	-0.196335	0.196335	-0.196335
INAFM2	INAFM2-202	ENST00000638170.2	protein_coding	INAFM2	protein_coding	1	1	0.961508	0.950382	0.656278	0.936107	0.752526	1	0.0107861	0	TRUE	0.196335	0.196335	-0.196335
INCENP	INCENP-206	ENST00000533896.5	protein_coding	INCENP	protein_coding	0	0	0	0	0.162578	0.13843	0.0568827	1	0.0110457	1	FALSE	-0.119297		-0.119297
INF2	INF2-201	ENST00000252527.8	nonsense_mediated_decay	INF2	protein_coding	0.0521079	0.05861	0.16533	0.0893055	0.0465103	0	0.0449274	1	0.00682694	1	FALSE	0.0608592	0.0608592	-0.108207
INF2	INF2-208	ENST00000481338.1	processed_transcript	INF2	protein_coding	0.1768	0.131334	0.123076	0.13129	0.0450262	0.118004	0.103993	1	0.00682694	1	FALSE	0.051617	0.0608592	-0.108207
INF2	INF2-210	ENST00000617571.5	nonsense_mediated_decay	INF2	protein_coding	0.202871	0.186125	0.252225	0.192589	0.126925	0.139704	0.178609	1	0.00682694	1	FALSE	0.0600397	0.0608592	-0.108207
INF2	INF2-215	ENST00000674686.1	nonsense_mediated_decay	INF2	protein_coding	0.139766	0.158474	0.056483	0.174331	0.219681	0.300556	0.201173	1	0.00682694	1	FALSE	-0.108207	0.0608592	-0.108207
INO80E	INO80E-201	ENST00000304516.11	protein_coding	INO80E	protein_coding	0.0392188	0.0875783	0.108251	0.106979	0.241533	0.27024	0.177459	1	0.000902813	1	FALSE	-0.144237	0.183848	-0.144237
INO80E	INO80E-207	ENST00000563197.6	protein_coding	INO80E	protein_coding	0.319413	0.43144	0.262391	0.383144	0.0998637	0.115483	0.2804	0	0.000902813	0.00305414	TRUE	0.183848	0.183848	-0.144237
INPP5J	INPP5J-201	ENST00000331075.10	protein_coding	INPP5J	protein_coding	0.699645	0.651888	0.42504	0.637764	0.187747	0.0995336	0.177625	1	0.000223564	0.00388991	TRUE	0.448616	0.448616	-0.444564
INPP5J	INPP5J-208	ENST00000412277.6	protein_coding	INPP5J	protein_coding	0	0.0555699	0.275978	0	0.370168	0.713532	0.498652	1	0.000223564	3.34365e-05	TRUE	-0.444564	0.448616	-0.444564
INSIG1	INSIG1-205	ENST00000468307.1	retained_intron	INSIG1	protein_coding	0.0983117	0.162852	0.0798057	0.142831	0.0497027	0.0169321	0.0684356	1	0.0070378	1	FALSE	0.0759266	0.0759266
INTS11	INTS11-208	ENST00000435064.6	protein_coding	INTS11	protein_coding	0.0940057	0.148067	0.0683701	0.140693	0.262199	0.363827	0.192291	1	0.00250629	0.00020511	TRUE	-0.159988		-0.159988
INTS6	INTS6-201	ENST00000311234.9	protein_coding	INTS6	protein_coding	0.14324	0.152029	0.15593	0.134048	0.114975	0.0881088	0.131548	1	1.29326e-05	1	FALSE	0.0347677	0.06143	-0.0673207
INTS6	INTS6-203	ENST00000442263.4	protein_coding	INTS6	protein_coding	0.177791	0.213646	0.159634	0.205278	0.139214	0.109201	0.134557	1	1.29326e-05	1	FALSE	0.06143	0.06143	-0.0673207
INTS6	INTS6-207	ENST00000469430.5	nonsense_mediated_decay	INTS6	protein_coding	0.00593235	0.00639543	0.0151236	0.00786575	0.0556736	0.0648248	0.0368202	1	1.29326e-05	1	FALSE	-0.0436102	0.06143	-0.0673207
INTS6	INTS6-215	ENST00000490542.5	protein_coding	INTS6	protein_coding	0.0625406	0.0614555	0.0723268	0.0571008	0.0444077	0.0552963	0.040351	1	1.29326e-05	1	FALSE	0.0166709	0.06143	-0.0673207
INTS6	INTS6-216	ENST00000491189.5	protein_coding	INTS6	protein_coding	0	0	0.0571419	0.0329992	0.113857	0.0959755	0.0597356	1	1.29326e-05	1	FALSE	-0.0673207	0.06143	-0.0673207
INTS6	INTS6-220	ENST00000497989.5	protein_coding	INTS6	protein_coding	0.110627	0.138235	0.154771	0.185228	0.194734	0.216262	0.205086	1	1.29326e-05	1	FALSE	-0.0581456	0.06143	-0.0673207
IQCB1	IQCB1-201	ENST00000310864.11	protein_coding	IQCB1	protein_coding	0.44925	0.461155	0.538509	0.664599	0.815429	0.831428	0.698787	1	0.00194309	0.0102349	TRUE	-0.253503	0.195267	-0.253503
IQCB1	IQCB1-206	ENST00000471726.1	retained_intron	IQCB1	protein_coding	0.493643	0.429677	0.394821	0.335401	0.184571	0.168572	0.301213	1	0.00194309	0.0880376	FALSE	0.195267	0.195267	-0.253503
IQCG	IQCG-206	ENST00000463651.1	processed_transcript	IQCG	protein_coding	0.044984	0.0576993	0	0.0312479	0.0744987	0.12108	0.227339	1	0.0234984	1	FALSE	-0.10749	0.187814	-0.10749
IQCG	IQCG-209	ENST00000478903.5	retained_intron	IQCG	protein_coding	0.528872	0.557495	0.513254	0.48082	0.358718	0.247232	0.390938	1	0.0234984	0.0984201	FALSE	0.187814	0.187814	-0.10749
IQGAP1	IQGAP1-201	ENST00000268182.10	protein_coding	IQGAP1	protein_coding	0.65967	0.544196	0.513687	0.508936	0.444616	0.379298	0.463087	1	0.0284888	1	FALSE	0.127622	0.127622	-0.0790723
IQGAP1	IQGAP1-203	ENST00000558491.1	retained_intron	IQGAP1	protein_coding	0.0534024	0.0603252	0.0735644	0.0350374	0.0758868	0.0754364	0.085506	1	0.0284888	1	FALSE	-0.0233607	0.127622	-0.0790723
IQGAP1	IQGAP1-218	ENST00000633485.1	nonsense_mediated_decay	IQGAP1	protein_coding	0	0	0.00904132	0.0282438	0.0691716	0.153271	0.0427384	1	0.0284888	1	FALSE	-0.0790723	0.127622	-0.0790723
IQSEC2	IQSEC2-207	ENST00000638630.1	protein_coding	IQSEC2	protein_coding	0.0995377	0.0731724	0.0334788	0.0918048	0	0	0	1	0.0422465	1	FALSE	0.0744984	0.0744984	-0.0962261
IQSEC2	IQSEC2-220	ENST00000674761.1	retained_intron	IQSEC2	protein_coding	0.165869	0.108525	0.102566	0.182347	0.218896	0.294352	0.19491	1	0.0422465	1	FALSE	-0.0962261	0.0744984	-0.0962261
ISG20	ISG20-207	ENST00000558992.1	processed_transcript	ISG20	protein_coding	0	0	0	0.195354	0	0.656888	0.618776	0	0.0428414	0.0095489	TRUE	-0.376383		-0.376383
ISLR2	ISLR2-202	ENST00000419208.2	protein_coding	ISLR2	protein_coding	0.209944	0.565434	0.347741	0.267296	0	0.0884201	0	1	0.00123477	0.000352559	TRUE	0.31813	0.31813
ITGA1	ITGA1-203	ENST00000504669.5	retained_intron	ITGA1	protein_coding	0.22234	0.236522	0.313866	0.377892	0.593959	0.545957	0.356319	0	0.000295438	0.00890154	TRUE	-0.21109	0.0733013	-0.21109
ITGA1	ITGA1-207	ENST00000514262.5	processed_transcript	ITGA1	protein_coding	0.165918	0.0181148	0.0785198	0.0306526	0	0	0	1	0.000295438	1	FALSE	0.0733013	0.0733013	-0.21109
ITGB3BP	ITGB3BP-204	ENST00000460394.5	processed_transcript	ITGB3BP	protein_coding	0.0636082	0.0979334	0.0914033	0.0871638	0.00670904	0.0341348	0.0611196	1	4.73773e-05	1	FALSE	0.0510394	0.0646807	-0.298603
ITGB3BP	ITGB3BP-205	ENST00000461681.5	processed_transcript	ITGB3BP	protein_coding	0.0328544	0.0341578	0.056143	0.0615326	0.0251664	0.0290712	0.0299036	1	4.73773e-05	1	FALSE	0.0181249	0.0646807	-0.298603
ITGB3BP	ITGB3BP-206	ENST00000462285.5	processed_transcript	ITGB3BP	protein_coding	0.12685	0.135229	0.118787	0.10783	0.0553683	0.0487453	0.0683662	1	4.73773e-05	1	FALSE	0.0646807	0.0646807	-0.298603
ITGB3BP	ITGB3BP-207	ENST00000463803.5	processed_transcript	ITGB3BP	protein_coding	0.0922403	0.0559191	0.0636225	0.068598	0.0304381	0.0216848	0.0539186	1	4.73773e-05	1	FALSE	0.0347478	0.0646807	-0.298603
ITGB3BP	ITGB3BP-211	ENST00000478538.1	processed_transcript	ITGB3BP	protein_coding	0.250289	0.352253	0.301051	0.337383	0.677019	0.723285	0.426238	1	4.73773e-05	8.3124e-09	TRUE	-0.298603	0.0646807	-0.298603
ITGBL1	ITGBL1-202	ENST00000376180.8	protein_coding	ITGBL1	protein_coding	0.812817	0.5488	0.844337	0.484138	0.308207	0.251292	0.261206	1	2.30748e-05	0.00418813	TRUE	0.398955	0.398955	-0.290771
ITGBL1	ITGBL1-203	ENST00000474233.1	retained_intron	ITGBL1	protein_coding	0	0	0	0.0981115	0.200122	0.509808	0.235965	1	2.30748e-05	0.000436345	TRUE	-0.290771	0.398955	-0.290771
ITGBL1	ITGBL1-206	ENST00000618057.4	protein_coding	ITGBL1	protein_coding	0	0	0	0.159165	0.251139	0.158834	0.258218	0	2.30748e-05	0.014471	TRUE	-0.182939	0.398955	-0.290771
ITPR1	ITPR1-210	ENST00000477577.2	retained_intron	ITPR1	protein_coding	0.0866151	0.0830588	0.0732435	0.0915783	0.122616	0.108022	0.0963361	1	0.0206452	1	FALSE	-0.0253673		-0.0253673
JADE1	JADE1-205	ENST00000504089.5	protein_coding	JADE1	protein_coding	0.0254242	0	0	0	0.116995	0.043902	0.139149	1	0.00458055	1	FALSE	-0.0936591	0.0397168	-0.0936591
JADE1	JADE1-211	ENST00000512960.5	protein_coding	JADE1	protein_coding	0.0647479	0.0983087	0.0875158	0.0699432	0.0288853	0.045658	0.0466931	1	0.00458055	1	FALSE	0.0397168	0.0397168	-0.0936591
JADE3	JADE3-203	ENST00000611250.4	protein_coding	JADE3	protein_coding	0	0.160719	0.633575	0.308667	0.761973	0.702423	0.531028	0	0.00318391	0.00784237	TRUE	-0.389401	0.422765	-0.389401
JADE3	JADE3-204	ENST00000614628.5	protein_coding	JADE3	protein_coding	0.827258	0.756496	0.270309	0.577276	0.138015	0.203364	0.21383	1	0.00318391	0.0676345	FALSE	0.422765	0.422765	-0.389401
JAK1	JAK1-210	ENST00000672179.1	protein_coding	JAK1	protein_coding	0	0	0	0	0.197549	0.28482	0.0136407	1	0.00039442	1	FALSE	-0.165336		-0.165336
JARID2	JARID2-201	ENST00000341776.7	protein_coding	JARID2	protein_coding	0.857161	0.784858	0.829053	0.815016	0.712052	0.641715	0.650987	1	3.628e-06	1	FALSE	0.153271	0.153271	-0.172672
JARID2	JARID2-202	ENST00000397311.4	protein_coding	JARID2	protein_coding	0.106552	0.154619	0.116358	0.130404	0.260007	0.328518	0.310443	1	3.628e-06	1	FALSE	-0.172672	0.153271	-0.172672
JDP2	JDP2-201	ENST00000267569.5	protein_coding	JDP2	protein_coding	0.395818	0.296293	0.335746	0.251865	0.0731574	0.158732	0.133323	1	0.00208977	1	FALSE	0.198193	0.198193	-0.469537
JDP2	JDP2-208	ENST00000651602.1	protein_coding	JDP2	protein_coding	0.239513	0.128635	0.393237	0	0.736	0.748249	0.495402	1	0.00208977	0.000162968	TRUE	-0.469537	0.198193	-0.469537
JMJD1C	JMJD1C-202	ENST00000399262.7	protein_coding	JMJD1C	protein_coding	0.170817	0.161357	0.189889	0.177779	0.365968	0.320464	0.313467	1	0.000723963	1	FALSE	-0.158339	0.0922061	-0.158339
JMJD1C	JMJD1C-207	ENST00000489372.4	processed_transcript	JMJD1C	protein_coding	0.116392	0.282582	0.130863	0.134746	0.0655817	0.0452995	0.110938	1	0.000723963	1	FALSE	0.0922061	0.0922061	-0.158339
JMJD1C	JMJD1C-212	ENST00000639129.1	protein_coding	JMJD1C	protein_coding	0.0991861	0.124413	0.0773848	0.0734275	0	0.0677449	0.0326973	1	0.000723963	1	FALSE	0.0601222	0.0922061	-0.158339
JPT2	JPT2-205	ENST00000562569.1	protein_coding	JPT2	protein_coding	0.0404495	0	0	0.0299353	0.117102	0.0454844	0.0679677	1	0.0192309	1	FALSE	-0.0592551		-0.0671283
JPT2	JPT2-207	ENST00000565851.5	protein_coding	JPT2	protein_coding	0	0	0.0428719	0	0.0717789	0.118036	0.0437237	1	0.0192309	1	FALSE	-0.0671283		-0.0671283
JPX	JPX-259	ENST00000666059.1	lncRNA	JPX	lncRNA	0.0632832	0.0717288	0.0775261	0.0779235	0.0375113	0.0451118	0.0543871	1	0.00318391	1	FALSE	0.0269454	0.0269454
JUND	JUND-201	ENST00000252818.5	protein_coding	JUND	protein_coding	1	1	0.917874	0.887819	0.717155	0.698451	0.951028	0	0.0284888	0	TRUE	0.162546	0.162546	-0.162546
JUND	JUND-202	ENST00000600972.1	protein_coding	JUND	protein_coding	0	0	0.0821262	0.112181	0.282845	0.301549	0.0489722	0	0.0284888	0	TRUE	-0.162546	0.162546	-0.162546
JUP	JUP-210	ENST00000585793.1	retained_intron	JUP	protein_coding	0.109713	0.0678349	0.228833	0.101847	0.429278	0.363273	0.314089	1	0.0464986	0.0247846	TRUE	-0.241823		-0.241823
KANK2	KANK2-213	ENST00000592903.5	protein_coding	KANK2	protein_coding	0.148442	0.135205	0.167495	0.166731	0.0823728	0.0261451	0.0992713	1	0.00513361	1	FALSE	0.0852052	0.0852052
KAT6A	KAT6A-202	ENST00000396930.4	protein_coding	KAT6A	protein_coding	0	0	0	0	0.106744	0.144368	0.0310121	1	6.15516e-12	1	FALSE	-0.0940412	0.0588018	-0.0940412
KAT6A	KAT6A-209	ENST00000647746.1	protein_coding	KAT6A	protein_coding	0.128193	0.147051	0.102782	0.109908	0.0529453	0.0445893	0.0920105	1	6.15516e-12	1	FALSE	0.0588018	0.0588018	-0.0940412
KAT8	KAT8-202	ENST00000448516.6	protein_coding	KAT8	protein_coding	0.0371034	0.0651322	0	0.0355743	0.0776311	0.108466	0.118584	1	0.0354127	1	FALSE	-0.067108		-0.067108
KBTBD12	KBTBD12-201	ENST00000343941.4	protein_coding	KBTBD12	protein_coding	1	0.910703	0.82997	0.835346	0.682586	0.469385	0.735283	1	0.0108073	0.00551145	TRUE	0.26492	0.26492	-0.15834
KBTBD12	KBTBD12-202	ENST00000405109.5	protein_coding	KBTBD12	protein_coding	0	0	0.12645	0.122963	0.277353	0.277332	0.107395	0	0.0108073	0.012472	TRUE	-0.15834	0.26492	-0.15834
KCNAB2	KCNAB2-206	ENST00000378097.6	protein_coding	KCNAB2	protein_coding	0.0142338	0	0.0240647	0.0219249	0.0680746	0.0709809	0.0538905	1	0.000820518	1	FALSE	-0.0492595	0.0766183	-0.0681025
KCNAB2	KCNAB2-218	ENST00000493807.2	processed_transcript	KCNAB2	protein_coding	0.05631	0	0	0	0.0760004	0.108884	0.0616556	1	0.000820518	1	FALSE	-0.0681025	0.0766183	-0.0681025
KCNAB2	KCNAB2-229	ENST00000656607.1	processed_transcript	KCNAB2	protein_coding	0.0626947	0.104319	0.0659285	0.085516	0.0193037	0.039607	0.0531253	1	0.000820518	1	FALSE	0.0422692	0.0766183	-0.0681025
KCNAB2	KCNAB2-241	ENST00000665338.1	retained_intron	KCNAB2	protein_coding	0.387277	0.35708	0.371387	0.407484	0.308787	0.279459	0.324321	1	0.000820518	1	FALSE	0.0766183	0.0766183	-0.0681025
KCNC4	KCNC4-205	ENST00000459877.1	retained_intron	KCNC4	protein_coding	0.0521648	0.0309017	0.0570801	0.050549	0.0593442	0.081263	0.0707014	1	0.00114346	1	FALSE	-0.0227623		-0.0227623
KCNE1	KCNE1-206	ENST00000432085.5	protein_coding	KCNE1	protein_coding	0	0	0	0.563279	0.247309	0.648087	0.286286	0	0.00947934	0.0399052	TRUE	-0.253075		-0.253075
KCNIP1	KCNIP1-201	ENST00000328939.9	protein_coding	KCNIP1	protein_coding	0.0462127	0.0652321	0.0438168	0.0743169	0.104722	0.134547	0.111267	1	0.00601432	1	FALSE	-0.0594506		-0.0594506
KCNJ3	KCNJ3-203	ENST00000544049.2	protein_coding	KCNJ3	protein_coding	0.470088	0.178139	0.258565	0.151598	0.450639	0.785673	0.490203	0	0.0346379	0.0370182	TRUE	-0.310907		-0.310907
KCNK10	KCNK10-201	ENST00000312350.9	protein_coding	KCNK10	protein_coding	0		0	0	0.136781	0.579954	0.645237	1	0.046123	1	FALSE
KCNK12	KCNK12-201	ENST00000327876.5	protein_coding	KCNK12	protein_coding	1	1	0.669273	0.31242	0.316833	0.138269	0.364542	0	0.044918	0	TRUE	0.472208	0.472208	-0.472208
KCNK12	KCNK12-202	ENST00000493527.1	processed_transcript	KCNK12	protein_coding	0	0	0.330727	0.68758	0.683167	0.861731	0.635458	0	0.044918	0	TRUE	-0.472208	0.472208	-0.472208
KCNMB4	KCNMB4-201	ENST00000258111.5	protein_coding	KCNMB4	protein_coding	0.869007	0.86677	0.900023	0.853008	0.912511	1	1	1	0.0121514	0	TRUE	-0.0986352	0.0986352	-0.0986352
KCNMB4	KCNMB4-202	ENST00000531884.1	nonsense_mediated_decay	KCNMB4	protein_coding	0.130993	0.13323	0.0999774	0.146992	0.0874887	0	0	1	0.0121514	0	TRUE	0.0986352	0.0986352	-0.0986352
KCNQ1	KCNQ1-201	ENST00000155840.12	protein_coding	KCNQ1	protein_coding	0.165057	0.146181	0.181193	0.419624	0.652234	0.845346	0.45596	1	0.0398646	0.0518293	FALSE	-0.423166	0.359771	-0.423166
KCNQ1	KCNQ1-204	ENST00000380776.4	protein_coding	KCNQ1	protein_coding	0.453714	0.348054	0.612923	0.276408	0	0	0.18901	1	0.0398646	0.0256447	TRUE	0.359771	0.359771	-0.423166
KCTD19	KCTD19-206	ENST00000566295.1	protein_coding	KCTD19	protein_coding	0.89672	0.893922	0.790292	0.904321	0.67314	0.436124	0.729674	1	0.00111874	0.000685073	TRUE	0.258335	0.258335	-0.108022
KCTD19	KCTD19-209	ENST00000568736.5	retained_intron	KCTD19	protein_coding	0	0.016192	0	0	0.0658928	0.0966265	0.0342681	1	0.00111874	1	FALSE	-0.0615478	0.258335	-0.108022
KCTD19	KCTD19-210	ENST00000569333.5	retained_intron	KCTD19	protein_coding	0.0426934	0.0341209	0.0928453	0.0399683	0.134622	0.240317	0.106347	1	0.00111874	1	FALSE	-0.108022	0.258335	-0.108022
KCTD19	KCTD19-211	ENST00000570049.5	retained_intron	KCTD19	protein_coding	0.0605866	0.0557649	0.116863	0.0557106	0.126346	0.226933	0.129711	1	0.00111874	1	FALSE	-0.0887654	0.258335	-0.108022
KCTD2	KCTD2-201	ENST00000322444.7	protein_coding	KCTD2	protein_coding	0.956349	0.699669	0.944269	0.700403	0.599973	0.67567	0.622357	1	0.00295995	0.365874	FALSE	0.192506	0.192506	-0.0961998
KCTD2	KCTD2-202	ENST00000375286.7	nonsense_mediated_decay	KCTD2	protein_coding	0	0.264129	0	0.183343	0.240402	0.196577	0.187224	0	0.00295995	0.0312102	TRUE	-0.0961998	0.192506	-0.0961998
KCTD7	KCTD7-201	ENST00000275532.8	protein_coding	KCTD7	protein_coding	0.0221734	0	0.0150881	0.0217811	0.108498	0.0988713	0.0559306	1	0.00360725	1	FALSE	-0.0730058	0.093014	-0.0730058
KCTD7	KCTD7-206	ENST00000639828.2	protein_coding	KCTD7	protein_coding	0.775431	0.802721	0.803706	0.810546	0.682042	0.694467	0.738753	1	0.00360725	1	FALSE	0.093014	0.093014	-0.0730058
KDM1A	KDM1A-202	ENST00000400181.9	protein_coding	KDM1A	protein_coding	0.197452	0.224154	0.186823	0.203179	0.259377	0.294554	0.279248	1	2.36267e-05	1	FALSE	-0.0748243	0.0733139	-0.0748243
KDM1A	KDM1A-204	ENST00000481879.1	retained_intron	KDM1A	protein_coding	0.114217	0.0851619	0.0899017	0.0334158	0	0	0.022081	1	2.36267e-05	1	FALSE	0.0733139	0.0733139	-0.0748243
KDM1A	KDM1A-206	ENST00000602503.1	retained_intron	KDM1A	protein_coding	0.0878241	0.0945486	0.0685576	0.0825855	0.0623502	0.0355818	0.0642284	1	2.36267e-05	1	FALSE	0.0293255	0.0733139	-0.0748243
KDM2B	KDM2B-215	ENST00000542973.5	protein_coding	KDM2B	protein_coding	0	0	0.150763	0.0534727	0.252753	0.18285	0.176779	1	0.00285807	1	FALSE	-0.153069	0.0430068	-0.153069
KDM2B	KDM2B-217	ENST00000543852.5	protein_coding	KDM2B	protein_coding	0.0705165	0.0582281	0.042395	0.0419505	0.0167622	0.00668529	0.00734966	1	0.00285807	1	FALSE	0.0430068	0.0430068	-0.153069
KDM3B	KDM3B-201	ENST00000314358.10	protein_coding	KDM3B	protein_coding	0.495898	0.623604	0.573803	0.530318	0.490662	0.441859	0.458307	1	0.0086867	1	FALSE	0.0922965	0.0922965	-0.078666
KDM3B	KDM3B-204	ENST00000507996.5	nonsense_mediated_decay	KDM3B	protein_coding	0.0570433	0.0420181	0.0570227	0.0969857	0.150155	0.16197	0.113676	1	0.0086867	1	FALSE	-0.078666	0.0922965	-0.078666
KDM3B	KDM3B-207	ENST00000510866.5	nonsense_mediated_decay	KDM3B	protein_coding	0.0106694	0.00972548	0	0	0.0587642	0.0587727	0.0276896	1	0.0086867	1	FALSE	-0.0433101	0.0922965	-0.078666
KDM5C	KDM5C-204	ENST00000375401.8	protein_coding	KDM5C	protein_coding	0.20006	0.271486	0.293992	0.27137	0	0.138008	0.257209	0	0.0159778	0.000125843	TRUE	0.127488	0.127488	-0.0537238
KDM5C	KDM5C-210	ENST00000467093.1	processed_transcript	KDM5C	protein_coding	0.0649323	0.0796972	0.0328747	0.0853181	0.127223	0.0965404	0.134524	1	0.0159778	1	FALSE	-0.0537238	0.127488	-0.0537238
KDM5D	KDM5D-202	ENST00000382806.6	protein_coding	KDM5D	protein_coding	0.0197845	0	0.021505	0.0417543	0.0718687	0.0667244	0.0761148	1	4.5086e-05	1	FALSE	-0.0508084	0.0894118	-0.0589499
KDM5D	KDM5D-203	ENST00000415360.1	protein_coding	KDM5D	protein_coding	0.0199735	0.0170748	0.00609287	0.0343757	0.122744	0.0630099	0.0492332	1	4.5086e-05	1	FALSE	-0.0589499	0.0894118	-0.0589499
KDM5D	KDM5D-208	ENST00000485154.1	retained_intron	KDM5D	protein_coding	0.231444	0.181361	0.218784	0.182131	0.0907638	0.101156	0.150135	1	4.5086e-05	1	FALSE	0.0894118	0.0894118	-0.0589499
KDM6B	KDM6B-204	ENST00000571047.5	processed_transcript	KDM6B	protein_coding	0.0607703	0	0	0.10234	0.243972	0.308118	0.137054	1	0.00039442	8.24197e-06	TRUE	-0.188937		-0.188937
KHDRBS3	KHDRBS3-207	ENST00000521461.5	nonsense_mediated_decay	KHDRBS3	protein_coding	0.0693343	0.038496	0.0309187	0	0.133517	0.114281	0.105019	1	0.0012427	1	FALSE	-0.0829182		-0.172369
KHDRBS3	KHDRBS3-211	ENST00000524199.5	protein_coding	KHDRBS3	protein_coding	0	0	0.122857	0	0.315753	0.193808	0.0996893	0	0.0012427	0.0010777	TRUE	-0.172369		-0.172369
KIAA0408	KIAA0408-204	ENST00000483725.8	protein_coding	KIAA0408	protein_coding	0.391038	0.592874	0.321279	0	0.716448	0.877995	0.355888	0	0.0373181	0.0113045	TRUE	-0.323812	0.164195	-0.323812
KIAA0408	KIAA0408-205	ENST00000487331.2	protein_coding	KIAA0408	protein_coding	0.291732	0.19246	0.2601	0.372938	0.100692	0.0685101	0.176135	1	0.0373181	1	FALSE	0.164195	0.164195	-0.323812
KIAA0513	KIAA0513-202	ENST00000538274.5	protein_coding	KIAA0513	protein_coding	0.257031	0.279522	0.197366	0.209905	0.11634	0.0730497	0.101473	1	0.0260284	1	FALSE	0.139002	0.139002	-0.168852
KIAA0513	KIAA0513-206	ENST00000566428.5	protein_coding	KIAA0513	protein_coding	0.408315	0.411381	0.509687	0.444235	0.669474	0.665083	0.502213	0	0.0260284	0.0365607	TRUE	-0.168852	0.139002	-0.168852
KIAA0753	KIAA0753-207	ENST00000572370.5	protein_coding	KIAA0753	protein_coding	0.0196294	0.014729	0.033319	0.0216158	0.079351	0.108783	0.0335599	1	0.0211837	1	FALSE	-0.0515745		-0.0515745
KIAA0930	KIAA0930-202	ENST00000336156.10	protein_coding	KIAA0930	protein_coding	0.192563	0.192369	0.253327	0.194267	0.175919	0.18962	0.182231	1	0.0118611	1	FALSE	0.0255412	0.0255412	-0.0910469
KIAA0930	KIAA0930-204	ENST00000414854.5	protein_coding	KIAA0930	protein_coding	0	0.015861	0.0765522	0.0471173	0.111814	0.0795414	0.186433	1	0.0118611	1	FALSE	-0.0910469	0.0255412	-0.0910469
KIAA1522	KIAA1522-203	ENST00000373481.7	protein_coding	KIAA1522	protein_coding	0.302595	0.348964	0.436082	0	0.586349	0.631165	0.634214	1	0.0247601	0.0041784	TRUE	-0.345332	0.301168	-0.345332
KIAA1522	KIAA1522-204	ENST00000401073.7	protein_coding	KIAA1522	protein_coding	0.406516	0.386328	0.461473	0.670782	0.208879	0.113203	0.218237	1	0.0247601	0.573913	FALSE	0.301168	0.301168	-0.345332
KIAA1586	KIAA1586-202	ENST00000488682.1	processed_transcript	KIAA1586	protein_coding	0.446339	0.54883	0.385532	0.370381	0.283035	0	0.362728	1	0.018492	0.00214483	TRUE	0.222516	0.222516	-0.082936
KIAA1586	KIAA1586-203	ENST00000545356.5	protein_coding	KIAA1586	protein_coding	0.189674	0.109385	0.19601	0.136365	0.272116	0.230516	0.219752	1	0.018492	1	FALSE	-0.082936	0.222516	-0.082936
KIDINS220	KIDINS220-201	ENST00000256707.8	protein_coding	KIDINS220	protein_coding	0.115855	0.160107	0.127577	0.194933	0	0	0.0648537	1	4.61264e-07	1	FALSE	0.128	0.128
KIF13A	KIF13A-201	ENST00000259711.11	protein_coding	KIF13A	protein_coding	0.0475492	0.0346704	0.0984171	0.073171	0.112551	0.180858	0.179455	1	0.0265946	1	FALSE	-0.0941696		-0.0941696
KIF13B	KIF13B-202	ENST00000522355.5	nonsense_mediated_decay	KIF13B	protein_coding	0.0150249	0.00929949	0.0262447	0.0353835	0.0363459	0.26413	0.0880257	1	0.0117914	1	FALSE	-0.108012		-0.108012
KIF18B	KIF18B-201	ENST00000585687.1	retained_intron	KIF18B	protein_coding	0	0	0.102676	0.0445174	0.153554	0.180354	0.112263	1	0.0243972	1	FALSE	-0.111925		-0.111925
KIF19	KIF19-201	ENST00000359939.10	retained_intron	KIF19	protein_coding	0.697919	0.396501	0.505411	0.708761	0.124126	0	0.297722	1	0.00229187	0.000709142	TRUE	0.436532	0.436532	-0.250057
KIF19	KIF19-204	ENST00000549637.1	retained_intron	KIF19	protein_coding	0	0.0484371	0	0	0.0854435	0.237538	0.0882141	1	0.00229187	1	FALSE	-0.124956	0.436532	-0.250057
KIF19	KIF19-205	ENST00000551017.1	retained_intron	KIF19	protein_coding	0.216805	0.223879	0.359037	0.180331	0.493602	0.617062	0.374545	1	0.00229187	0.57702	FALSE	-0.250057	0.436532	-0.250057
KIF1B	KIF1B-201	ENST00000263934.10	protein_coding	KIF1B	protein_coding	0	0	0.022994	0	0.0598896	0.113906	0.0573256	1	2.89888e-08	1	FALSE	-0.071292	0.056653	-0.071292
KIF1B	KIF1B-205	ENST00000377093.8	protein_coding	KIF1B	protein_coding	0.237223	0.299894	0.255385	0.24769	0.200913	0.194509	0.214763	1	2.89888e-08	1	FALSE	0.056653	0.056653	-0.071292
KIF1B	KIF1B-211	ENST00000620295.2	protein_coding	KIF1B	protein_coding	0.0209276	0.00618875	0.0187971	0.0317801	0.0684388	0.120977	0.0609221	1	2.89888e-08	1	FALSE	-0.0640225	0.056653	-0.071292
KIF1C	KIF1C-203	ENST00000573815.1	processed_transcript	KIF1C	protein_coding	0.173689	0.255704	0	0	0.286237	0.243689	0.160305	0	0.0181928	0.0315247	TRUE	-0.122729		-0.122729
KIF21A	KIF21A-212	ENST00000552908.1	protein_coding	KIF21A	protein_coding	0.188867	0.191734	0.192593	0.140788	0.0627087	0	0.121088	1	0.000361477	1	FALSE	0.11723	0.11723
KIF23	KIF23-201	ENST00000260363.9	protein_coding	KIF23	protein_coding	0	0	0	0.194476	0.128092	0.27813	0.290732	0	0.0479047	0.00456331	TRUE	-0.183699		-0.183699
KIF26B	KIF26B-203	ENST00000479506.1	processed_transcript	KIF26B	protein_coding	0	0	0	0.407001	0.224097	0.41074	0.32395	0	0.0253205	0.0322158	TRUE	-0.217845		-0.217845
KIF2A	KIF2A-201	ENST00000381103.7	protein_coding	KIF2A	protein_coding	0.0559443	0.0614051	0.0796204	0.0560327	0.0973505	0.108971	0.124692	1	4.67701e-06	1	FALSE	-0.0470871	0.101066	-0.170522
KIF2A	KIF2A-202	ENST00000401507.7	protein_coding	KIF2A	protein_coding	0	0.102021	0.126964	0.144514	0.296207	0.28899	0.206495	1	4.67701e-06	0.000715825	TRUE	-0.170522	0.101066	-0.170522
KIF2A	KIF2A-209	ENST00000514082.6	protein_coding	KIF2A	protein_coding	0.177109	0.0831565	0.130363	0.116035	0	0	0.0767996	1	4.67701e-06	1	FALSE	0.101066	0.101066	-0.170522
KIF5C	KIF5C-201	ENST00000435030.6	protein_coding	KIF5C	protein_coding	0.145394	0.288676	0.371522	0.498726	0	0	0.312905	0	0.00192894	0.000163364	TRUE	0.221778	0.221778
KIF9	KIF9-202	ENST00000425452.1	protein_coding	KIF9	protein_coding	0.286109	0.578986	0.219265	0.243554	0.109938	0.0914946	0.0858845	1	0.0405579	0.375278	FALSE	0.236206	0.236206	-0.0826913
KIF9	KIF9-207	ENST00000452770.6	protein_coding	KIF9	protein_coding	0	0.0309602	0	0	0.157175	0.0744384	0.0396802	1	0.0405579	1	FALSE	-0.0826913	0.236206	-0.0826913
KIFBP	KIFBP-203	ENST00000625461.2	retained_intron	KIFBP	protein_coding	0.197721	0.335996	0.226861	0.176842	0	0	0.110547	1	1.92108e-06	5.15629e-09	TRUE	0.197506	0.197506
KIT	KIT-204	ENST00000514582.1	retained_intron	KIT	protein_coding	0.289216	0.160442	0.0951684	0.168473	0	0.131465	0	0	0.0138951	0.00272384	TRUE	0.134503	0.134503
KLC1	KLC1-211	ENST00000538504.6	retained_intron	KLC1	protein_coding	0.0573192	0.0916834	0.109317	0.092897	0.0263513	0.0500726	0.0498299	1	2.7507e-11	1	FALSE	0.0457195	0.0457195	-0.0699313
KLC1	KLC1-213	ENST00000553325.5	protein_coding	KLC1	protein_coding	0	0	0	0	0.116861	0.0772185	0.0157144	1	2.7507e-11	1	FALSE	-0.0699313	0.0457195	-0.0699313
KLC1	KLC1-218	ENST00000555467.1	retained_intron	KLC1	protein_coding	0.0591911	0.0776592	0.0408669	0.0461202	0.102564	0.164465	0.0979934	1	2.7507e-11	1	FALSE	-0.0657148	0.0457195	-0.0699313
KLF11	KLF11-206	ENST00000540845.5	protein_coding	KLF11	protein_coding	0	0	0.389208	0.409959	0.580896	0.421519	0.240555	0	0.033625	0.00496806	TRUE	-0.214532		-0.214532
KLF7	KLF7-201	ENST00000309446.11	protein_coding	KLF7	protein_coding	0.385787	0.29078	0.360688	0.396536	0.273251	0.241754	0.274946	1	0.0157836	1	FALSE	0.095131	0.095131	-0.107868
KLF7	KLF7-203	ENST00000421199.5	protein_coding	KLF7	protein_coding	0.154333	0.099682	0.151817	0.228278	0.236502	0.289756	0.272928	1	0.0157836	1	FALSE	-0.107868	0.095131	-0.107868
KLF7	KLF7-204	ENST00000423015.5	protein_coding	KLF7	protein_coding	0.0174127	0.05431	0.086304	0.0806859	0.221136	0.124896	0.102322	1	0.0157836	1	FALSE	-0.0897731	0.095131	-0.107868
KLHDC8B	KLHDC8B-203	ENST00000462582.1	processed_transcript	KLHDC8B	protein_coding	0.256415	0.154912	0.267141	0.271485	0	0	0.248953	0	0.00268918	3.09264e-05	TRUE	0.154504	0.154504
KLHL21	KLHL21-201	ENST00000377658.8	protein_coding	KLHL21	protein_coding	0.584012	0.532824	0.535015	0.57038	0.462693	0.294794	0.400395	1	3.09739e-05	0.121616	FALSE	0.169597	0.169597	-0.156616
KLHL21	KLHL21-205	ENST00000496707.5	protein_coding	KLHL21	protein_coding	0	0	0.0188325	0.056003	0.168273	0.153891	0.20381	1	3.09739e-05	1	FALSE	-0.156616	0.169597	-0.156616
KLHL3	KLHL3-204	ENST00000504208.5	nonsense_mediated_decay	KLHL3	protein_coding	0	0	0.0161866	0.0124048	0.0518565	0.0742641	0.0648833	1	0.00232798	1	FALSE	-0.0565202	0.0742116	-0.0565202
KLHL3	KLHL3-207	ENST00000506491.5	protein_coding	KLHL3	protein_coding	0.0686463	0.0817554	0.0994349	0.100674	0	0	0.0402484	1	0.00232798	1	FALSE	0.0742116	0.0742116	-0.0565202
KLHL7	KLHL7-213	ENST00000521082.5	nonsense_mediated_decay	KLHL7	protein_coding	0.208051	0.242864	0.220101	0.246228	0.0860802	0.169891	0.0822289	1	0.0422505	1	FALSE	0.116578	0.116578
KLK10	KLK10-206	ENST00000601467.1	nonsense_mediated_decay	KLK10	protein_coding	0.704122	0.845235	0.673171	0.787524	0.952939	0.802316	0.958686	0	0.000998612	0.0433885	TRUE	-0.152134		-0.152134
KLK2	KLK2-207	ENST00000595173.1	retained_intron	KLK2	protein_coding	0	0.0221367	0.0898035	0.0926575	0.142643	0.18662	0.170846	1	0.031801	1	FALSE	-0.115554	0.358472	-0.115554
KLK2	KLK2-218	ENST00000599568.1	protein_coding	KLK2	protein_coding	0.854134	0.900472	0.438474	0.505354	0.287348	0.279796	0.381266	1	0.031801	0.0042696	TRUE	0.358472	0.358472	-0.115554
KMT5B	KMT5B-201	ENST00000304363.9	protein_coding	KMT5B	protein_coding	0.16202	0.147507	0.0959179	0.118346	0.0719723	0.072283	0.0892383	1	0.036834	1	FALSE	0.0531163	0.0938892	-0.0790021
KMT5B	KMT5B-203	ENST00000401547.6	protein_coding	KMT5B	protein_coding	0	0.136778	0.0947163	0.0882906	0.191106	0.144851	0.140888	1	0.036834	1	FALSE	-0.0790021	0.0938892	-0.0790021
KMT5B	KMT5B-212	ENST00000466295.1	retained_intron	KMT5B	protein_coding	0.172721	0.156143	0.222661	0.175937	0.109459	0.0542217	0.100248	1	0.036834	1	FALSE	0.0938892	0.0938892	-0.0790021
KNDC1	KNDC1-201	ENST00000304613.8	protein_coding	KNDC1	protein_coding	0.498212	0.615046	0.49383	0.391131	0.299803	0.221587	0.375038	1	0.0119214	1	FALSE	0.200745	0.200745	-0.309226
KNDC1	KNDC1-203	ENST00000478074.5	processed_transcript	KNDC1	protein_coding	0.131509	0.175278	0.145863	0.226041	0.0527804	0.12309	0.0968618	1	0.0119214	1	FALSE	0.078762	0.200745	-0.309226
KNDC1	KNDC1-204	ENST00000485110.5	processed_transcript	KNDC1	protein_coding	0.278591	0	0	0.0721385	0.384648	0.428536	0.377543	1	0.0119214	0.000402313	TRUE	-0.309226	0.200745	-0.309226
KPNA4	KPNA4-204	ENST00000676799.1	nonsense_mediated_decay	KPNA4	protein_coding	0	0	0.0272959	0	0.101674	0.05196	0.102206	1	2.51611e-10	1	FALSE	-0.0784561	0.0596231	-0.0784561
KPNA4	KPNA4-208	ENST00000678630.1	nonsense_mediated_decay	KPNA4	protein_coding	0.0572346	0.0731767	0.0848274	0.102171	0.0499476	0.00924064	0	1	2.51611e-10	1	FALSE	0.0596231	0.0596231	-0.0784561
KRT18	KRT18-201	ENST00000388835.4	protein_coding	KRT18	protein_coding	1	0.805199	0.956396	0.951326	0.467338	0.629084	0.61407	1	0.000130957	0	TRUE	0.358066	0.358066	-0.358066
KRT18	KRT18-202	ENST00000388837.6	protein_coding	KRT18	protein_coding	0	0.194801	0.0436041	0.0486737	0.532662	0.370916	0.38593	1	0.000130957	0	TRUE	-0.358066	0.358066	-0.358066
KRT8	KRT8-211	ENST00000549176.1	retained_intron	KRT8	protein_coding	0	0	0.0409479	0.047376	0.102496	0.162574	0.223041	1	0.0223652	1	FALSE	-0.140623	0.190278	-0.140623
KRT8	KRT8-212	ENST00000549198.1	processed_transcript	KRT8	protein_coding	0.684762	0.473094	0.393345	0.437511	0.289644	0.285128	0.345929	1	0.0223652	1	FALSE	0.190278	0.190278	-0.140623
KSR1	KSR1-209	ENST00000579399.1	retained_intron	KSR1	protein_coding	0.0889064	0.112618	0.116745	0.0672094	0.0389159	0.0136183	0.039749	1	0.0301236	1	FALSE	0.0656086	0.0781724	-0.0357241
KSR1	KSR1-215	ENST00000582410.5	protein_coding	KSR1	protein_coding	0.0355241	0.0281818	0.0338975	0.0430937	0.0603677	0.0641092	0.088218	1	0.0301236	1	FALSE	-0.0357241	0.0781724	-0.0357241
KSR1	KSR1-220	ENST00000644974.1	protein_coding	KSR1	protein_coding	0.183552	0.167107	0.195669	0.238264	0.13627	0.101962	0.115694	1	0.0301236	1	FALSE	0.0781724	0.0781724	-0.0357241
KTN1	KTN1-205	ENST00000395314.8	protein_coding	KTN1	protein_coding	0.220014	0.268535	0.166428	0.162931	0.138336	0.16223	0.158388	1	0.0479448	1	FALSE	0.051492	0.051492	-0.071282
KTN1	KTN1-209	ENST00000553360.5	nonsense_mediated_decay	KTN1	protein_coding	0.0332682	0.0253734	0.0177272	0.0370813	0.136005	0.0903033	0.0726258	1	0.0479448	1	FALSE	-0.071282	0.051492	-0.071282
LAMB2	LAMB2-212	ENST00000484713.1	retained_intron	LAMB2	protein_coding	0.267659	0.253567	0.126834	0.169482	0	0.124241	0.11602	1	0.00599296	1	FALSE	0.124299	0.124299
LAMTOR1	LAMTOR1-207	ENST00000544594.5	protein_coding	LAMTOR1	protein_coding	0.0893777	0.0627124	0.0723954	0.113194	0	0	0	1	4.83742e-08	1	FALSE	0.08442	0.08442
LARGE2	LARGE2-203	ENST00000414027.2	retained_intron	LARGE2	protein_coding	0	0	0	0	0.263085	0.249569	0.457373	1	0.0220454	1	FALSE	-0.323342		-0.323342
LARP4B	LARP4B-204	ENST00000440895.2	protein_coding	LARP4B	protein_coding	0.0842537	0.129636	0.0940546	0.0624878	0.0481306	0.0190589	0.0271367	1	0.000419687	1	FALSE	0.0611659	0.0611659	-0.0715486
LARP4B	LARP4B-205	ENST00000448368.5	protein_coding	LARP4B	protein_coding	0.0269694	0.019464	0.0303662	0.0399227	0.103996	0.0763394	0.0579093	1	0.000419687	1	FALSE	-0.0502344	0.0611659	-0.0715486
LARP4B	LARP4B-207	ENST00000476529.5	nonsense_mediated_decay	LARP4B	protein_coding	0.0768869	0.0397107	0.0614588	0.095392	0.168336	0.134103	0.117292	1	0.000419687	1	FALSE	-0.0715486	0.0611659	-0.0715486
LARS1	LARS1-203	ENST00000504323.6	retained_intron	LARS1	protein_coding	0.118325	0.124903	0.122998	0.127285	0.0643136	0.075492	0.118316	1	0.0064282	1	FALSE	0.0373371	0.0487149	-0.0471282
LARS1	LARS1-204	ENST00000505223.6	retained_intron	LARS1	protein_coding	0.0712855	0.0725031	0.10258	0.102797	0.140461	0.14056	0.122238	1	0.0064282	1	FALSE	-0.0471282	0.0487149	-0.0471282
LARS1	LARS1-218	ENST00000674218.1	retained_intron	LARS1	protein_coding	0.166755	0.145973	0.134951	0.159115	0.19137	0.180963	0.172923	1	0.0064282	1	FALSE	-0.0300534	0.0487149	-0.0471282
LARS1	LARS1-227	ENST00000674417.1	retained_intron	LARS1	protein_coding	0.212169	0.187424	0.198652	0.173	0.129012	0.160293	0.142983	1	0.0064282	1	FALSE	0.0487149	0.0487149	-0.0471282
LARS2	LARS2-207	ENST00000485461.1	nonsense_mediated_decay	LARS2	protein_coding	0.205049	0.0774658	0.0885528	0.111388	0.323865	0.261429	0.217488	1	5.67952e-07	1	FALSE	-0.14698	0.126606	-0.14698
LARS2	LARS2-209	ENST00000645846.2	protein_coding	LARS2	protein_coding	0.0632689	0.203457	0.129347	0.11035	0	0	0	1	5.67952e-07	1	FALSE	0.126606	0.126606	-0.14698
LAS1L	LAS1L-217	ENST00000678602.1	retained_intron	LAS1L	protein_coding	0.195778	0.0964659	0.191063	0.144778	0.0258139	0.0226711	0.0476058	1	0.0115277	1	FALSE	0.124991	0.124991
LASP1	LASP1-201	ENST00000318008.11	protein_coding	LASP1	protein_coding	0.761854	0.764441	0.719709	0.609667	0.515153	0.521146	0.661258	0	0.0468677	0.0480112	TRUE	0.148066	0.148066
LDLR	LDLR-214	ENST00000560628.1	processed_transcript	LDLR	protein_coding	0.0663568	0.0669547	0.0574347	0.021904	0	0	0.0126781	1	0.0190609	1	FALSE	0.0489365	0.0489365
LEF1-AS1	LEF1-AS1-202	ENST00000506314.1	retained_intron	LEF1-AS1	lncRNA	0.894113	0.655485	0.729222	0.691162	0.382647	0.423805	0.391581	1	0.00600788	0.294655	FALSE	0.343151	0.343151	-0.246696
LEF1-AS1	LEF1-AS1-208	ENST00000659790.1	lncRNA	LEF1-AS1	lncRNA	0	0	0	0	0.262294	0.146574	0.33122	1	0.00600788	1	FALSE	-0.246696	0.343151	-0.246696
LEMD2	LEMD2-209	ENST00000511171.5	retained_intron	LEMD2	protein_coding	0.0790474	0.0798434	0.0735686	0.0801176	0.0834479	0.099723	0.0824243	1	0.00923002	1	FALSE	-0.0103875		-0.0724743
LEMD2	LEMD2-212	ENST00000513832.5	retained_intron	LEMD2	protein_coding	0	0	0	0.0225875	0.0722129	0.118511	0.0436394	1	0.00923002	1	FALSE	-0.0724743		-0.0724743
LEPR	LEPR-204	ENST00000371059.7	protein_coding	LEPR	protein_coding	0.129852	0.0914144	0.171942	0.231243	0.273479	0.398658	0.296651	1	1.93565e-11	0.061838	FALSE	-0.166816	0.251993	-0.166816
LEPR	LEPR-205	ENST00000371060.7	protein_coding	LEPR	protein_coding	0.391681	0.309906	0.160593	0.145791	0	0	0	1	1.93565e-11	1	FALSE	0.251993	0.251993	-0.166816
LGALS8	LGALS8-214	ENST00000475670.2	retained_intron	LGALS8	protein_coding	0.0512661	0.0854281	0.0611431	0.0400093	0	0.0282646	0.0267255	1	4.83742e-08	1	FALSE	0.0411316	0.0588925	-0.17586
LGALS8	LGALS8-227	ENST00000532640.1	retained_intron	LGALS8	protein_coding	0.0651214	0.0426128	0.064215	0.0636207	0	0	0	1	4.83742e-08	1	FALSE	0.0588925	0.0588925	-0.17586
LGALS8	LGALS8-228	ENST00000532826.5	retained_intron	LGALS8	protein_coding	0.0606468	0.0726972	0.0597842	0.157704	0.358995	0.246416	0.185293	1	4.83742e-08	0.000122615	TRUE	-0.17586	0.0588925	-0.17586
LIFR	LIFR-201	ENST00000263409.8	protein_coding	LIFR	protein_coding	0.201975	0.263087	0.261756	0.312446	0.167778	0	0.215928	0	0.023407	0.00354378	TRUE	0.131914	0.131914
LIFR	LIFR-205	ENST00000506990.5	protein_coding	LIFR	protein_coding	0.106341	0.102829	0.0955568	0.074017	0.0488015	0.0226031	0.061589	1	0.023407	1	FALSE	0.0503548	0.131914
LINC-PINT	LINC-PINT-203	ENST00000429901.2	retained_intron	LINC-PINT	lncRNA	0.270385	0.309841	0.285371	0.325394	0.504745	0.486421	0.356677	1	0.0166485	1	FALSE	-0.151533	0.0516958	-0.151533
LINC-PINT	LINC-PINT-206	ENST00000435523.5	lncRNA	LINC-PINT	lncRNA	0.0752363	0.166304	0.078433	0.087589	0.0677119	0.0459192	0.0426448	1	0.0166485	1	FALSE	0.0497986	0.0516958	-0.151533
LINC-PINT	LINC-PINT-222	ENST00000647388.1	lncRNA	LINC-PINT	lncRNA	0.180526	0.129411	0.139052	0.142672	0.0725971	0.0945049	0.121557	1	0.0166485	1	FALSE	0.0516958	0.0516958	-0.151533
LINC00278	LINC00278-206	ENST00000654222.1	lncRNA	LINC00278	lncRNA	0.218229	0.201092	0.314297	0.174223	0.0874102	0.0758803	0.160036	1	0.00220275	1	FALSE	0.119185	0.119185	-0.333541
LINC00278	LINC00278-208	ENST00000665487.1	lncRNA	LINC00278	lncRNA	0.249243	0.206622	0.295301	0.371339	0.760685	0.66865	0.413167	1	0.00220275	0.0023352	TRUE	-0.333541	0.119185	-0.333541
LINC00323	LINC00323-204	ENST00000654244.1	lncRNA	LINC00323	lncRNA	0.283352		0.251082	1	0	0	0	1	0.0206314	1	FALSE
LINC00390	LINC00390-205	ENST00000662947.1	lncRNA	LINC00390	lncRNA	0.690483	0.853734	0.623841	0.587425	0.44543	0.270027	0.472173	1	0.0484436	0.285748	FALSE	0.292994	0.292994
LINC00461	LINC00461-227	ENST00000663994.1	lncRNA	LINC00461	lncRNA	0	0	0	0	0.327285	0.245642	0.33688	1	0.000582201	1	FALSE	-0.303269		-0.303269
LINC00466	LINC00466-201	ENST00000418086.1	lncRNA	LINC00466	lncRNA	0	0	0	0	0.155343	0.089783	0.171838	1	2.79929e-09	1	FALSE	-0.138988	0.730232	-0.18638
LINC00466	LINC00466-202	ENST00000432537.2	retained_intron	LINC00466	lncRNA	0	0	0	0	0.183979	0.0922081	0.0546799	1	2.79929e-09	1	FALSE	-0.110289	0.730232	-0.18638
LINC00466	LINC00466-218	ENST00000658957.1	lncRNA	LINC00466	lncRNA	0	0	0.0798922	0	0.0885858	0.327456	0.203017	1	2.79929e-09	0.498644	FALSE	-0.18638	0.730232	-0.18638
LINC00466	LINC00466-229	ENST00000667879.1	lncRNA	LINC00466	lncRNA	0.86431	1	0.534332	1	0	0	0.358285	1	2.79929e-09	2.99026e-11	TRUE	0.730232	0.730232	-0.18638
LINC00467	LINC00467-206	ENST00000653498.1	lncRNA	LINC00467	lncRNA	0	0	0	0	0.180056	0.124829	0.0820517	1	3.72184e-08	1	FALSE	-0.128979		-0.128979
LINC00467	LINC00467-218	ENST00000662409.1	lncRNA	LINC00467	lncRNA	0.0680462	0.0188202	0.0519796	0.0400654	0.0769935	0.100034	0.0964223	1	3.72184e-08	1	FALSE	-0.0464219		-0.128979
LINC00632	LINC00632-206	ENST00000625883.2	lncRNA	LINC00632	lncRNA	0.654639	0.665738	0.65704	0.58029	0.318714	0.381972	0.649225	0	0.0206968	0.0393255	TRUE	0.189457	0.189457
LINC00654	LINC00654-201	ENST00000379053.4	lncRNA	LINC00654	lncRNA	0.946951	0.878373	0.683037	0.907588	0.437233	0.631964	0.461083	1	0.000168432	0.0168258	TRUE	0.343894	0.343894	-0.22098
LINC00654	LINC00654-204	ENST00000654011.1	lncRNA	LINC00654	lncRNA	0	0.062514	0.0701208	0	0.126936	0.122918	0.173907	1	0.000168432	1	FALSE	-0.108095	0.343894	-0.22098
LINC00654	LINC00654-208	ENST00000664106.1	lncRNA	LINC00654	lncRNA	0	0	0	0	0.267715	0.129982	0.265242	1	0.000168432	1	FALSE	-0.22098	0.343894	-0.22098
LINC00668	LINC00668-202	ENST00000578497.5	lncRNA	LINC00668	lncRNA	0	0	0.282022	0	0.49363	0.568796	0.513618	1	0.00217755	6.76942e-05	TRUE	-0.454842	0.439406	-0.454842
LINC00668	LINC00668-204	ENST00000580197.5	lncRNA	LINC00668	lncRNA	0.70354	1	0.506104	0.659077	0.325304	0.233646	0.274371	1	0.00217755	0.00450509	TRUE	0.439406	0.439406	-0.454842
LINC00683	LINC00683-218	ENST00000659606.1	lncRNA	LINC00683	lncRNA	0.0476215	0.077889	0.0578794	0.0405859	0	0	0.0145211	1	0.0271189	1	FALSE	0.0511536	0.0511536
LINC00839	LINC00839-206	ENST00000667964.1	lncRNA	LINC00839	lncRNA	0.578457	0.591223	0.531159	0.328186	0.254554	0	0.416364	0	0.0125135	0.0309121	TRUE	0.283617	0.283617
LINC00905	LINC00905-204	ENST00000589071.4	retained_intron	LINC00905	lncRNA			0.156952		0.0401809	0.020219	0.145693	1	0.000952865	1	FALSE
LINC00905	LINC00905-215	ENST00000657571.1	lncRNA	LINC00905	lncRNA			0		0.394108	0.495053	0.470104	1	0.000952865	1	FALSE
LINC00905	LINC00905-219	ENST00000659441.1	lncRNA	LINC00905	lncRNA			0.315197		0.0553541	0.12739	0.0458267	1	0.000952865	1	FALSE
LINC00905	LINC00905-223	ENST00000662052.1	lncRNA	LINC00905	lncRNA			0.0858667		0.0367928	0.0594466	0.0687659	1	0.000952865	1	FALSE
LINC00954	LINC00954-205	ENST00000649549.1	lncRNA	LINC00954	lncRNA	0.10853	0.0535757	0.0421633	0.0478912	0	0	0.0155392	1	0.0410545	1	FALSE	0.0578603	0.0578603
LINC00958	LINC00958-210	ENST00000653981.1	lncRNA	LINC00958	lncRNA	0.0178832	0.00589775	0.0382604	0.0269742	0.0561105	0.0991558	0.0764588	1	0.0154452	1	FALSE	-0.0549878	0.254067	-0.13808
LINC00958	LINC00958-214	ENST00000667588.1	lncRNA	LINC00958	lncRNA	0.916753	0.652477	0.831454	0.703975	0.537069	0.447841	0.581382	1	0.0154452	0.27092	FALSE	0.254067	0.254067	-0.13808
LINC00958	LINC00958-215	ENST00000671253.1	lncRNA	LINC00958	lncRNA	0	0.254973	0	0.209173	0.259718	0.271435	0.231197	0	0.0154452	0.0144118	TRUE	-0.13808	0.254067	-0.13808
LINC00989	LINC00989-203	ENST00000654276.1	lncRNA	LINC00989	lncRNA	0.220397	0.1957	0.263003	0.169616	0	0	0	1	1.80679e-07	1	FALSE	0.212179	0.212179	-0.427881
LINC00989	LINC00989-208	ENST00000664228.1	lncRNA	LINC00989	lncRNA	0	0	0	0.728194	0.919349	0.756773	0.153666	0	1.80679e-07	2.57592e-05	TRUE	-0.427881	0.212179	-0.427881
LINC01001	LINC01001-201	ENST00000526704.6	lncRNA	LINC01001	lncRNA	0.4333	0.413929	0.331213	0.492396	0.250417	0.219377	0.324543	1	0.00673575	1	FALSE	0.15293	0.15293	-0.213412
LINC01001	LINC01001-202	ENST00000527683.1	lncRNA	LINC01001	lncRNA	0.272421	0.163264	0.3749	0.190812	0.457459	0.531237	0.402589	1	0.00673575	0.00084751	TRUE	-0.213412	0.15293	-0.213412
LINC01001	LINC01001-203	ENST00000607448.5	lncRNA	LINC01001	lncRNA	0.294279	0.422807	0.293888	0.316792	0.292124	0.249386	0.272868	1	0.00673575	1	FALSE	0.0604821	0.15293	-0.213412
LINC01016	LINC01016-201	ENST00000506222.6	lncRNA	LINC01016	lncRNA	1	1	0.430705	1	0	0.0841801	0.135514	1	6.57366e-07	9.4313e-10	TRUE	0.784445	0.784445	-0.535463
LINC01016	LINC01016-208	ENST00000656906.1	lncRNA	LINC01016	lncRNA	0	0	0.0435802	0	0.338629	0.27847	0.0592018	1	6.57366e-07	0.14307	FALSE	-0.214539	0.784445	-0.535463
LINC01016	LINC01016-212	ENST00000671143.1	lncRNA	LINC01016	lncRNA	0	0	0.330677	0	0.661371	0.574761	0.618265	1	6.57366e-07	0.000247277	TRUE	-0.535463	0.784445	-0.535463
LINC01018	LINC01018-205	ENST00000652158.1	lncRNA	LINC01018	lncRNA	0.362962	0.255772	0.187717	0.489002	0	0.123544	0	1	2.52243e-05	0.0710344	FALSE	0.282682	0.282682	-0.421836
LINC01018	LINC01018-208	ENST00000658850.1	lncRNA	LINC01018	lncRNA	0	0	0	0	0.560637	0.312753	0.392118	1	2.52243e-05	1	FALSE	-0.421836	0.282682	-0.421836
LINC01098	LINC01098-201	ENST00000507870.1	lncRNA	LINC01098	lncRNA	1	1	0.602249	0.864532	0.519119	0.529033	0.411669	1	0.0406536	0.0489563	TRUE	0.380088	0.380088	-0.329765
LINC01098	LINC01098-202	ENST00000666825.1	lncRNA	LINC01098	lncRNA	0	0	0.177599	0	0.372281	0.391874	0.35834	1	0.0406536	0.012101	TRUE	-0.329765	0.380088	-0.329765
LINC01120	LINC01120-201	ENST00000437751.2	lncRNA	LINC01120	lncRNA	0	0	0.0527778	0	0.253254	0.126471	0.11206	1	1.36908e-06	1	FALSE	-0.150734	0.524517	-0.175193
LINC01120	LINC01120-202	ENST00000653180.1	lncRNA	LINC01120	lncRNA	0.603996	0.7619	0.462238	0.803414	0.158848	0.0990749	0.142189	1	1.36908e-06	0.00025056	TRUE	0.524517	0.524517	-0.175193
LINC01120	LINC01120-206	ENST00000664380.1	lncRNA	LINC01120	lncRNA	0.0736205	0	0	0	0.203724	0.239369	0.1377	1	1.36908e-06	0.0253658	TRUE	-0.175193	0.524517	-0.175193
LINC01120	LINC01120-211	ENST00000671078.1	lncRNA	LINC01120	lncRNA	0	0	0.0486983	0	0.0738799	0.159732	0.0529158	1	1.36908e-06	1	FALSE	-0.0833347	0.524517	-0.175193
LINC01194	LINC01194-201	ENST00000505196.1	lncRNA	LINC01194	lncRNA	0.870061	0.973323	0.684785	0.563578	0.231147	0.448507	0.260883	1	1.53529e-06	0.00233517	TRUE	0.459424	0.459424	-0.376645
LINC01194	LINC01194-205	ENST00000664069.1	lncRNA	LINC01194	lncRNA	0	0	0	0	0.633052	0.309719	0.187165	1	1.53529e-06	1	FALSE	-0.376645	0.459424	-0.376645
LINC01203	LINC01203-223	ENST00000671651.1	lncRNA	LINC01203	lncRNA	0	0	0	0	0.0805685	0.0343083	0.130004	1	0.01274	1	FALSE	-0.081627		-0.081627
LINC01206	LINC01206-204	ENST00000482787.7	lncRNA	LINC01206	lncRNA	0.00295026	0.00192094	0.0586687	0.00580881	0.168866	0.321942	0.138906	1	6.29462e-05	4.22818e-06	TRUE	-0.192568		-0.192568
LINC01409	LINC01409-220	ENST00000609830.1	lncRNA	LINC01409	lncRNA	0.175123	0.160869	0.241177	0.302962	0.520856	0.546716	0.400984	1	5.96209e-05	0.00256403	TRUE	-0.269486		-0.269486
LINC01515	LINC01515-216	ENST00000618687.4	lncRNA	LINC01515	lncRNA	0.0466055	0.0525933	0.0357383	0.0214215	0.0696688	0.148547	0.0720432	1	0.00458055	1	FALSE	-0.0576633		-0.100414
LINC01515	LINC01515-228	ENST00000659814.1	lncRNA	LINC01515	lncRNA	0	0	0	0.0482272	0.0897188	0.158133	0.0895592	1	0.00458055	1	FALSE	-0.100414		-0.100414
LINC01551	LINC01551-203	ENST00000550266.1	lncRNA	LINC01551	lncRNA	0.283583	0.343757	0.260795	0.109015	0.0107716	0.0345887	0.191168	0	0.0303316	0	TRUE	0.170445	0.170445	-0.170445
LINC01551	LINC01551-206	ENST00000653638.1	lncRNA	LINC01551	lncRNA	0.716417	0.656243	0.739205	0.890985	0.989228	0.965411	0.808832	0	0.0303316	0	TRUE	-0.170445	0.170445	-0.170445
LINC01579	LINC01579-207	ENST00000557481.6	lncRNA	LINC01579	lncRNA	0.191739	0.188437	0.234978	0.221689	0.108278	0.184561	0.182696	1	0.00848131	1	FALSE	0.0506989	0.122899	-0.078971
LINC01579	LINC01579-217	ENST00000667659.1	lncRNA	LINC01579	lncRNA	0.764322	0.811563	0.701381	0.711885	0.638142	0.539875	0.69515	1	0.00848131	1	FALSE	0.122899	0.122899	-0.078971
LINC01579	LINC01579-218	ENST00000669397.1	lncRNA	LINC01579	lncRNA	0	0	0.0175353	0	0.0606625	0.11737	0.072032	1	0.00848131	1	FALSE	-0.078971	0.122899	-0.078971
LINC01597	LINC01597-201	ENST00000380888.5	lncRNA	LINC01597	lncRNA	0.157202	0.231178	0.370458	0.259122	0.543086	0.676571	0.440849	1	0.0188833	0.126342	FALSE	-0.299012		-0.299012
LINC01667	LINC01667-205	ENST00000651050.1	processed_transcript	LINC01667	transcribed_processed_pseudogene	1	1	0.32698	0.765876	0.116496	0.169652	0.164095	1	0.000112877	2.36948e-06	TRUE	0.623133	0.623133	-0.302273
LINC01667	LINC01667-206	ENST00000651542.1	processed_transcript	LINC01667	transcribed_processed_pseudogene	0	0	0.256387	0	0.390813	0.408034	0.300261	1	0.000112877	0.0241119	TRUE	-0.302273	0.623133	-0.302273
LINC01806	LINC01806-203	ENST00000655684.1	lncRNA	LINC01806	lncRNA	0	0	0	0.511198	0.816368	0.687104	1	1	0.0109942	0.00553015	TRUE	-0.706691		-0.706691
LINC01902	LINC01902-202	ENST00000636983.1	lncRNA	LINC01902	lncRNA	0.233034	0.244486	0.243764	0.261856	0.124343	0.174568	0.194162	1	0.0273601	1	FALSE	0.0814274	0.101533
LINC01902	LINC01902-206	ENST00000663227.1	lncRNA	LINC01902	lncRNA	0.120337	0.10378	0.117358	0.105024	0.0302757	0	0	1	0.0273601	1	FALSE	0.101533	0.101533
LINC02018	LINC02018-203	ENST00000610109.1	lncRNA	LINC02018	lncRNA	0.121123	0.110059	0.171381	0.160852	0.173316	0.219482	0.200941	1	0.000445463	1	FALSE	-0.0570593	0.0901237	-0.0570593
LINC02018	LINC02018-231	ENST00000666979.1	lncRNA	LINC02018	lncRNA	0.152433	0.213485	0.146872	0.159677	0.109673	0	0.124306	1	0.000445463	1	FALSE	0.0901237	0.0901237	-0.0570593
LINC02207	LINC02207-230	ENST00000665888.1	lncRNA	LINC02207	lncRNA	0.414923	0.16728	0.307586	0.659779	0	0	0	1	0.00102002	1	FALSE	0.387392	0.387392
LINC02235	LINC02235-202	ENST00000647805.1	lncRNA	LINC02235	lncRNA	0.769612	0.704949	0.309988	0.588972	0.140246	0.197077	0.249421	1	0.0445016	0.0104305	TRUE	0.397799	0.397799	-0.0870819
LINC02235	LINC02235-204	ENST00000656073.1	lncRNA	LINC02235	lncRNA	0.0814424	0.0393409	0.0837017	0.0458541	0.139429	0.141164	0.168407	1	0.0445016	1	FALSE	-0.0870819	0.397799	-0.0870819
LINC02336	LINC02336-201	ENST00000434117.2	lncRNA	LINC02336	lncRNA	0	0	0.562603	0	0.226034	0.721056	0.403112	0	0.0336994	0	TRUE	-0.309417	0.309417	-0.309417
LINC02336	LINC02336-202	ENST00000659314.1	lncRNA	LINC02336	lncRNA	1	1	0.437397	1	0.773966	0.278944	0.596888	0	0.0336994	0	TRUE	0.309417	0.309417	-0.309417
LINC02482	LINC02482-202	ENST00000515205.1	lncRNA	LINC02482	lncRNA	0	0.237348	0.250692	0	0.410405	0.299532	0.563032	1	0.0405802	0.0249441	TRUE	-0.302313		-0.302313
LINC02552	LINC02552-214	ENST00000661353.1	lncRNA	LINC02552	lncRNA	0.80977	1	0.52324	0.66467	0.351992	0.263055	0.604581	0	0.0398719	0	TRUE	0.342877	0.342877	-0.342877
LINC02552	LINC02552-215	ENST00000662458.1	lncRNA	LINC02552	lncRNA	0.19023	0	0.47676	0.33533	0.648008	0.736945	0.395419	0	0.0398719	0	TRUE	-0.342877	0.342877	-0.342877
LINC02558	LINC02558-201	ENST00000416995.2	lncRNA	LINC02558	lncRNA	0.0143161	0	0.0349775	0.0118108	0.139012	0.100903	0.0884831	1	0.00107666	1	FALSE	-0.0941897	0.236424	-0.142234
LINC02558	LINC02558-202	ENST00000436395.1	lncRNA	LINC02558	lncRNA	0	0.0954391	0.0329997	0	0.153821	0.185884	0.183327	1	0.00107666	1	FALSE	-0.142234	0.236424	-0.142234
LINC02558	LINC02558-203	ENST00000658411.1	lncRNA	LINC02558	lncRNA	0.985684	0.904561	0.932023	0.988189	0.707167	0.713213	0.72819	1	0.00107666	0.00037386	TRUE	0.236424	0.236424	-0.142234
LINC02606	LINC02606-202	ENST00000641507.1	lncRNA	LINC02606	lncRNA	0	0	0.429222	0.36473	0.473795	0.759927	0.50455	1	0.0134232	0.00143579	TRUE	-0.380936		-0.380936
LINC02645	LINC02645-212	ENST00000666064.1	lncRNA	LINC02645	lncRNA	0	0	0	0	0.0821264	0.206714	0.149637	1	0.0454982	1	FALSE	-0.146159		-0.187626
LINC02645	LINC02645-214	ENST00000668732.1	lncRNA	LINC02645	lncRNA	0	0	0	0.209791	0.246887	0.246862	0.226474	1	0.0454982	1	FALSE	-0.187626		-0.187626
LINC02646	LINC02646-202	ENST00000647943.1	lncRNA	LINC02646	lncRNA	1	1	0.852846	0.851796	0.687733	0.393485	0.711203	1	0.00307058	0.102719	FALSE	0.328687	0.328687	-0.338865
LINC02646	LINC02646-203	ENST00000648275.1	lncRNA	LINC02646	lncRNA	0	0	0	0	0.312267	0.46966	0.234667	1	0.00307058	1	FALSE	-0.338865	0.328687	-0.338865
LINC02693	LINC02693-219	ENST00000658783.1	lncRNA	LINC02693	lncRNA	0.0591311	0.0574004	0.0212559	0.0742922	0.177589	0.167255	0.127901	1	0.000984131	1	FALSE	-0.104561	0.173588	-0.104561
LINC02693	LINC02693-225	ENST00000666869.1	lncRNA	LINC02693	lncRNA	0.339962	0.29975	0.408899	0.332811	0.249361	0.14045	0.125491	1	0.000984131	0.233909	FALSE	0.173588	0.173588	-0.104561
LIPE-AS1	LIPE-AS1-201	ENST00000457234.2	lncRNA	LIPE-AS1	lncRNA	0.190036	0.133876	0.139583	0.108247	0.287493	0.293594	0.272385	1	0.0318884	1	FALSE	-0.141555	0.201456	-0.141555
LIPE-AS1	LIPE-AS1-202	ENST00000593491.2	lncRNA	LIPE-AS1	lncRNA	0.221997	0.420641	0.341195	0.360175	0.0942248	0.11967	0.189744	1	0.0318884	0.0220997	TRUE	0.201456	0.201456	-0.141555
LMBRD1	LMBRD1-210	ENST00000648265.1	processed_transcript	LMBRD1	protein_coding	0.0998424	0.130247	0.131564	0.199535	0	0	0.0627691	1	0.000105031	1	FALSE	0.119374	0.119374	-0.0650325
LMBRD1	LMBRD1-211	ENST00000648303.1	nonsense_mediated_decay	LMBRD1	protein_coding	0.0901141	0.0955742	0.108205	0.147892	0.0767014	0.0808429	0.067186	1	0.000105031	1	FALSE	0.0355361	0.119374	-0.0650325
LMBRD1	LMBRD1-224	ENST00000649673.1	nonsense_mediated_decay	LMBRD1	protein_coding	0.339029	0.296899	0.321747	0.291618	0.361037	0.417499	0.353532	1	0.000105031	1	FALSE	-0.0650325	0.119374	-0.0650325
LMNA	LMNA-229	ENST00000675431.1	retained_intron	LMNA	protein_coding	0	0	0	0	0.18296	0.107063	0.0510923	1	0.00468292	1	FALSE	-0.113705		-0.113705
LNPEP	LNPEP-201	ENST00000231368.10	protein_coding	LNPEP	protein_coding	0.697276	0.771896	0.681589	0.667825	0.611205	0.615253	0.640496	1	0.0310309	1	FALSE	0.0823286	0.0823286
LNPK	LNPK-203	ENST00000409660.5	protein_coding	LNPK	protein_coding	0.0821974	0.0543518	0.128773	0.0812888	0.260566	0.568386	0.272311	1	0.0237637	0.234341	FALSE	-0.280435	0.0515843	-0.280435
LNPK	LNPK-206	ENST00000466445.1	processed_transcript	LNPK	protein_coding	0.0644363	0.0613158	0.0221858	0.0820393	0.01773	0	0	1	0.0237637	1	FALSE	0.0515843	0.0515843	-0.280435
LNX2	LNX2-201	ENST00000316334.5	protein_coding	LNX2	protein_coding	1	1	0.654203	1	0.860852	0.770745	0.93958	0	0.0373097	0	TRUE	0.0564919	0.0564919	-0.0564919
LNX2	LNX2-202	ENST00000649248.1	protein_coding	LNX2	protein_coding	0	0	0.345797	0	0.139148	0.229255	0.0604199	0	0.0373097	0	TRUE	-0.0564919	0.0564919	-0.0564919
LPXN	LPXN-201	ENST00000395074.7	protein_coding	LPXN	protein_coding	0	0	0	0	0.173933	0.361915	0.109638	1	2.38981e-09	1	FALSE	-0.215162	0.196581	-0.215162
LPXN	LPXN-203	ENST00000528954.5	protein_coding	LPXN	protein_coding	0.255659	0.325803	0.320288	0.209057	0	0	0.243363	0	2.38981e-09	1.89941e-06	TRUE	0.196581	0.196581	-0.215162
LRBA	LRBA-210	ENST00000510841.1	retained_intron	LRBA	protein_coding	0	0	0	0.0566596	0.0895525	0.0867466	0.115378	1	0.00322991	1	FALSE	-0.0830607		-0.0830607
LRCH4	LRCH4-201	ENST00000310300.11	protein_coding	LRCH4	protein_coding	0.199857	0.187511	0.292641	0.200965	0.107758	0.112646	0.178517	1	0.000183882	1	FALSE	0.0872703	0.0872703	-0.100585
LRCH4	LRCH4-204	ENST00000476881.2	retained_intron	LRCH4	protein_coding	0.0632805	0.0593236	0.0941881	0.058715	0.190086	0.177007	0.141293	1	0.000183882	1	FALSE	-0.100585	0.0872703	-0.100585
LRCH4	LRCH4-205	ENST00000485554.5	protein_coding	LRCH4	protein_coding	0.0876267	0.133359	0.131247	0.172123	0.0730887	0.0295866	0.0729552	1	0.000183882	1	FALSE	0.0725456	0.0872703	-0.100585
LRCOL1	LRCOL1-203	ENST00000544018.6	nonsense_mediated_decay	LRCOL1	protein_coding	0	0	0		1	0.505928	0.226045	1	0.00104961	1	FALSE
LRCOL1	LRCOL1-205	ENST00000616042.1	retained_intron	LRCOL1	protein_coding	0.827802	0.37925	0.765012		0	0	0	1	0.00104961	1	FALSE
LRFN3	LRFN3-201	ENST00000246529.4	protein_coding	LRFN3	protein_coding	0.206106	0.213201	0.190813	0.180049	0.33168	0.232433	0.296289	1	0.0345484	1	FALSE	-0.0892587		-0.113715
LRFN3	LRFN3-202	ENST00000585876.1	processed_transcript	LRFN3	protein_coding	0.381581	0.481691	0.504779	0.438508	0.50841	0.548389	0.639264	1	0.0345484	1	FALSE	-0.113715		-0.113715
LRP1	LRP1-210	ENST00000556247.1	retained_intron	LRP1	protein_coding	0.0856154	0.0862823	0.0847613	0.0967317	0.0773264	0.0833795	0.0751243	1	0.0303269	1	FALSE	0.0097376	0.0097376
LRP1B	LRP1B-201	ENST00000389484.8	protein_coding	LRP1B	protein_coding	0.442566	0.621795	0.48628	0.334024	1	1	0.848109	1	6.59432e-05	2.29565e-05	TRUE	-0.478204	0.282765	-0.478204
LRP1B	LRP1B-202	ENST00000434794.1	protein_coding	LRP1B	protein_coding	0.079026	0.14252	0.346848	0.213359	0	0	0	1	6.59432e-05	1	FALSE	0.195438	0.282765	-0.478204
LRP1B	LRP1B-205	ENST00000486364.1	processed_transcript	LRP1B	protein_coding	0.478408	0.235685	0.166872	0.452617	0	0	0.151891	1	6.59432e-05	0.0113459	TRUE	0.282765	0.282765	-0.478204
LRP8	LRP8-212	ENST00000496580.1	retained_intron	LRP8	protein_coding	0.0627977	0.0718311	0.0977692	0.113445	0.0391506	0.0391812	0.0187727	1	0.00490264	1	FALSE	0.0540925	0.0540925
LRP8	LRP8-228	ENST00000661457.1	nonsense_mediated_decay	LRP8	protein_coding	0.0750014	0.0836429	0.0917383	0.0931046	0.0527101	0.0549983	0.0535521	1	0.00490264	1	FALSE	0.0321183	0.0540925
LRRC24	LRRC24-201	ENST00000529415.7	protein_coding	LRRC24	protein_coding	1	1	1	0.93352	0.718584	0.758907	0.833223	1	0.00647552	0	TRUE	0.213142	0.213142	-0.213142
LRRC24	LRRC24-202	ENST00000533758.1	protein_coding	LRRC24	protein_coding	0	0	0	0.0664802	0.281416	0.241093	0.166777	1	0.00647552	0	TRUE	-0.213142	0.213142	-0.213142
LRRC36	LRRC36-201	ENST00000329956.11	protein_coding	LRRC36	protein_coding	0	0	0	0	0.0743702	0.180465	0.0658554	1	7.19641e-06	1	FALSE	-0.106897	0.24663	-0.116415
LRRC36	LRRC36-206	ENST00000563303.5	processed_transcript	LRRC36	protein_coding	0.651578	0.765005	0.590943	0.700226	0.410171	0.296356	0.584397	1	7.19641e-06	0.0250517	TRUE	0.24663	0.24663	-0.116415
LRRC36	LRRC36-210	ENST00000567723.5	nonsense_mediated_decay	LRRC36	protein_coding	0.0485331	0.0304413	0.0532215	0.0761718	0.104719	0.156337	0.0819095	1	7.19641e-06	1	FALSE	-0.0622299	0.24663	-0.116415
LRRC36	LRRC36-215	ENST00000569228.6	retained_intron	LRRC36	protein_coding	0.0380121	0.0121692	0.0797511	0.0536038	0.114647	0.176654	0.195595	1	7.19641e-06	1	FALSE	-0.116415	0.24663	-0.116415
LRRC37A11P	LRRC37A11P-201	ENST00000425901.2	processed_transcript	LRRC37A11P	transcribed_unprocessed_pseudogene	0.0329421	0.202146	0.164037	0.213151	0.427072	0.530391	0.349705	1	0.0122282	0.039384	TRUE	-0.282654	0.422329	-0.282654
LRRC37A11P	LRRC37A11P-202	ENST00000579258.6	transcribed_unprocessed_pseudogene	LRRC37A11P	transcribed_unprocessed_pseudogene	0.057407	0.0875774	0.177366	0.0658043	0.287967	0.1968	0.225373	1	0.0122282	1	FALSE	-0.139675	0.422329	-0.282654
LRRC37A11P	LRRC37A11P-203	ENST00000647826.1	processed_transcript	LRRC37A11P	transcribed_unprocessed_pseudogene	0.909651	0.710276	0.658597	0.721045	0.28496	0.272809	0.424922	1	0.0122282	0.00150217	TRUE	0.422329	0.422329	-0.282654
LRRC52-AS1	LRRC52-AS1-205	ENST00000438275.5	lncRNA	LRRC52-AS1	lncRNA		0	0	0.0284116	0.175025	0.115032	0.359511	1	0.00506023	1	FALSE
LRRC52-AS1	LRRC52-AS1-207	ENST00000454251.1	lncRNA	LRRC52-AS1	lncRNA		0	0.750093	0.888038	0.368579	0	0	0	0.00506023	0.00478449	TRUE
LRRC57	LRRC57-202	ENST00000397130.8	protein_coding	LRRC57	protein_coding	0.763724	0.81574	0.83178	0.725717	0.904104	0.876533	0.876051	1	0.000181113	1	FALSE	-0.101322	0.110162	-0.101322
LRRC57	LRRC57-203	ENST00000562868.1	retained_intron	LRRC57	protein_coding	0.129313	0.0227661	0.111808	0.17676	0	0	0	1	0.000181113	1	FALSE	0.110162	0.110162	-0.101322
LRRC59	LRRC59-201	ENST00000225972.8	protein_coding	LRRC59	protein_coding	0.979422	1	0.899802	0.965088	0.602574	0.698463	0.729863	1	3.07397e-06	0	TRUE	0.284111	0.284111	-0.284111
LRRC59	LRRC59-202	ENST00000503118.2	protein_coding	LRRC59	protein_coding	0.0205778	0	0.100198	0.0349123	0.397426	0.301537	0.270137	1	3.07397e-06	0	TRUE	-0.284111	0.284111	-0.284111
LRRC74B	LRRC74B-202	ENST00000469766.1	retained_intron	LRRC74B	protein_coding	0	0	0.0860082	0	0.061333	0.299883	0.201349	0	0.0263422	0.0179225	TRUE	-0.16602	0.222316	-0.16602
LRRC74B	LRRC74B-204	ENST00000497328.5	retained_intron	LRRC74B	protein_coding	1	1	0.846283	0.96171	0.822411	0.659409	0.707227	1	0.0263422	0.00919128	TRUE	0.222316	0.222316	-0.16602
LRRFIP2	LRRFIP2-210	ENST00000440742.2	protein_coding	LRRFIP2	protein_coding	0.0116054	0.00996589	0.0427299	0.026522	0.103526	0.062657	0.0491309	1	1.04565e-12	1	FALSE	-0.0490655	0.0608215	-0.162781
LRRFIP2	LRRFIP2-211	ENST00000452742.5	protein_coding	LRRFIP2	protein_coding	0	0	0	0	0.103518	0.236954	0.14787	1	1.04565e-12	1	FALSE	-0.162781	0.0608215	-0.162781
LRRFIP2	LRRFIP2-220	ENST00000496825.2	processed_transcript	LRRFIP2	protein_coding	0.112596	0.120251	0.1216	0.135697	0.0462912	0.0283617	0.110491	1	1.04565e-12	1	FALSE	0.0608215	0.0608215	-0.162781
LRRK1	LRRK1-205	ENST00000526457.3	nonsense_mediated_decay	LRRK1	protein_coding	0.00870684	0.00751829	0	0.11761	0.159601	0.302127	0.0539139	0	0.0152565	0.0122548	TRUE	-0.138422		-0.138422
LRTOMT	LRTOMT-202	ENST00000324866.11	protein_coding	LRTOMT	protein_coding	0.0549738	0.112225	0.1438	0.0223824	0.283778	0.14867	0.284467	1	0.0374442	0.857954	FALSE	-0.155626	0.329314	-0.155626
LRTOMT	LRTOMT-216	ENST00000642510.1	protein_coding	LRTOMT	protein_coding	0.77177	0.768887	0.765707	0.81078	0.363353	0.432106	0.554459	1	0.0374442	0.0452314	TRUE	0.329314	0.329314	-0.155626
LSM14A	LSM14A-201	ENST00000433627.9	protein_coding	LSM14A	protein_coding	0.255098	0.305522	0.160402	0.215567	0	0	0.198325	0	3.31063e-06	7.65284e-08	TRUE	0.168039	0.168039
LSM5	LSM5-206	ENST00000409987.5	protein_coding	LSM5	protein_coding	0.179225	0.15107	0.26365	0.310113	0	0.0673605	0	1	0.0371404	0.00248772	TRUE	0.203561	0.203561
LSS	LSS-201	ENST00000356396.8	protein_coding	LSS	protein_coding	0.0185589	0.0212693	0.015798	0.0381616	0.111542	0.0943382	0.0433944	1	0.00402246	1	FALSE	-0.0596445	0.0837185	-0.0596445
LSS	LSS-205	ENST00000457828.6	protein_coding	LSS	protein_coding	0.353297	0.376671	0.368509	0.341844	0.228788	0.274682	0.325615	1	0.00402246	1	FALSE	0.0837185	0.0837185	-0.0596445
LSS	LSS-208	ENST00000474319.1	retained_intron	LSS	protein_coding	0.0579879	0.0594423	0.065751	0.0623853	0.0933796	0.0775086	0.0667713	1	0.00402246	1	FALSE	-0.0178282	0.0837185	-0.0596445
LTBR	LTBR-201	ENST00000228918.9	protein_coding	LTBR	protein_coding	0.280901	0.236232	0.258634	0.308036	0.0794784	0.0708534	0.160868	1	0.00275382	1	FALSE	0.167217	0.167217	-0.15183
LTBR	LTBR-202	ENST00000440421.2	retained_intron	LTBR	protein_coding	0.580671	0.619302	0.631845	0.52911	0.826265	0.716197	0.683724	1	0.00275382	1	FALSE	-0.15183	0.167217	-0.15183
LUM	LUM-201	ENST00000266718.5	protein_coding	LUM	protein_coding	0.678989	0.729964	0.683089	0.721812	1	1	0.736036	1	0.00126541	0	TRUE	-0.208549	0.208549	-0.208549
LUM	LUM-203	ENST00000548071.1	processed_transcript	LUM	protein_coding	0.321011	0.270036	0.316911	0.278188	0	0	0.263964	1	0.00126541	0	TRUE	0.208549	0.208549	-0.208549
LYN	LYN-203	ENST00000520050.1	protein_coding	LYN	protein_coding	0.348016	0.423091	0.232153	0.158744	0	0	0.382883	0	0.0256241	0.00476844	TRUE	0.162873	0.162873
LYPLAL1	LYPLAL1-202	ENST00000366928.10	protein_coding	LYPLAL1	protein_coding	0.144317	0.219204	0.21859	0.202419	0	0.130728	0	1	9.20756e-06	1	FALSE	0.152556	0.152556	-0.137976
LYPLAL1	LYPLAL1-210	ENST00000481007.1	processed_transcript	LYPLAL1	protein_coding	0.352048	0.422646	0.329689	0.365146	0.582295	0.498124	0.435656	1	9.20756e-06	1	FALSE	-0.137976	0.152556	-0.137976
LYPLAL1	LYPLAL1-212	ENST00000496776.5	processed_transcript	LYPLAL1	protein_coding	0.297273	0.297021	0.292541	0.301977	0.178701	0.231986	0.255861	1	9.20756e-06	1	FALSE	0.0750206	0.152556	-0.137976
LYRM2	LYRM2-209	ENST00000523793.5	processed_transcript	LYRM2	protein_coding	0.18469	0.188499	0.248343	0.244578	0.419955	0.332005	0.275825	1	0.0163598	1	FALSE	-0.126067		-0.126067
LYSMD1	LYSMD1-201	ENST00000368908.10	protein_coding	LYSMD1	protein_coding	0.8818	0.938015	0.912384	0.844749	0.549853	0.659089	0.818426	1	0.03255	0	TRUE	0.218448	0.218448	-0.218448
LYSMD1	LYSMD1-202	ENST00000440902.2	protein_coding	LYSMD1	protein_coding	0.1182	0.0619852	0.0876159	0.155251	0.450147	0.340911	0.181574	1	0.03255	0	TRUE	-0.218448	0.218448	-0.218448
LZTR1	LZTR1-204	ENST00000439171.5	nonsense_mediated_decay	LZTR1	protein_coding	0	0	0.0208867	0.038804	0.0405818	0.0678136	0.0587535	1	0.00327099	1	FALSE	-0.0407936		-0.0407936
LZTR1	LZTR1-217	ENST00000643578.1	retained_intron	LZTR1	protein_coding	0.0378071	0.0637419	0.064072	0.0581809	0.094411	0.0653585	0.0806172	1	0.00327099	1	FALSE	-0.0241784		-0.0407936
MACO1	MACO1-204	ENST00000647928.1	nonsense_mediated_decay	MACO1	protein_coding	0	0.1964	0.348654	0	0.373356	0.539948	0.263362	0	0.0233024	0.00607966	TRUE	-0.255959		-0.255959
MACROD2	MACROD2-202	ENST00000378058.7	protein_coding	MACROD2	protein_coding	0.0855721	0.138378	0.110883	0.0971415	0.0386623	0.0485941	0	1	0.00552377	1	FALSE	0.0789082	0.0843542
[truncated: 2,211 more rows]
